# Supplementary material for: Localization, proteomics, and metabolite profiling reveal a putative vesicular transporter for UDP-glucose
Source: eLife. 2021 Jul 16;10:e65417. doi: 10.7554/eLife.65417 (PMC8373376; doi:10.7554/eLife.65417)
Supplement: Figure 1—source data 1. [file elife-65417-fig1-data1.xlsx]

## Sheet: Sheet1
SLC Gene symbol	Colocalization Ratio	Standard Error
VAChT	0.8742	0.0386
6A17	0.8692	0.0666
6A7	0.8617	0.0288
35F6	0.8492	0.0593
VGLUT1	0.8478	0.0267
35C1	0.8407	0.0393
O2B1	0.8367	0.0374
10A4	0.8333	0.0246
35F2	0.8161	0.0356
26A11	0.8071	0.0279
7A4	0.7911	0.1666
35F3	0.7694	0.0525
19A3	0.762	0.0778
48A1	0.7564	0.1011
35A3	0.7533	0.0867
25A40	0.7514	0.056
36A3	0.7363	0.0558
38A6	0.7347	0.0603
VMAT2	0.734	0.0314
35D3	0.73344	0.15043
35 E4	0.7043	0.0774
22A6	0.7036	0.0765
52A3	0.7023	0.0462
9A1	0.6872	0.1142
35A2	0.6869	0.0782
35F1	0.6795	0.1079
39A5	0.6482	0.0976
35G2	0.64806	0.2111
6A14	0.6408	0.1751
25A13	0.6283	0.0818
41A2	0.6257	0.0975
35B4	0.6195	0.1613
VGAT	0.619	0.0719
38A4	0.6092	0.0254
35D2	0.5989	0.1127
5A7	0.5903	0.096
5A3	0.5883	0.2155
2A6	0.5703	0.1595
35G5	0.5613	0.0987
40A1	0.5598	0.0748
VNUT	0.5491	0.2768
43A3	0.5485	0.1405
5A12	0.5461	0.1325
35B1	0.5395	0.0741
22A24	0.5148	0.0246
VGLUT3	0.5054	0.1094
11A2	0.5053	0.0686
33A1	0.5048	0.1863
35G1	0.5	0.0989
31A1	0.4975	0.1053
5A2	0.4773	0.1416
16A4	0.4697	0.176
25A39	0.4637	0.1059
39A14	0.456	0.1698
4A7	0.4478	0.0616
6A20	0.4451	0.0754
10A1	0.4401	0.0974
27A3	0.4147	0.1109
4A1	0.4067	0.535
8A3	0.4022	0.1592
19A2	0.4016	0.1372
26A5	0.3979	0.1498
25A26	0.3979	0.0995
45A4	0.3968	0.0607
5A7	0.3956	0.2585
O1B1	0.3941	0.1177
4A3	0.3858	0.1211
36A4	0.3805	0.1345
35F1	0.3797	0.118
45A2	0.3777	0.1476
35F5	0.375	0.176
2A11	0.3749	0.127
27A6	0.3737	0.1804
6A17	0.3721	0.1315
22A16	0.3694	0.115
30A3	0.3681	0
35D1	0.3667	0.0277
26A2	0.3651	0.1554
12A3	0.3608	0.1143
35B2	0.3603	0.1235
25A51	0.3583	0.4211
2A8	0.3574	0.0617
44A5	0.3534	0.1475
22A11	0.3476	0.1891
35C2	0.333	0.0103
30A9	0.33	0.2027
5A1	0.3291	0.1555
9A7	0.3261	0.1041
12A7	0.325	0.1464
26A3	0.3234	0.0822
7A2	0.3059	0.0568
9A2	0.3033	0.0997
24A1	0.3022	0.0846
30A2	0.2977	0.1037
O1B3	0.2911	0.0973
VMAT1	0.2908	0.056
7A2	0.2881	0.0711
16A3	0.28	0.0402
O4A1	0.2791	0.1777
35E2B	0.2782	0.0498
20A2	0.2637	0.0822
39A1	0.2621	0.0548
30A5	0.2524	0.1465
35B3	0.2367	0.1485
8A2	0.2315	0.092
41A1	0.2243	0.0724
22A9	0.2189	0.0964
25A28	0.2185	0.2524
50A1	0.1972	0
pero	0.1935	0
7A13	0.1913	0.0106
35C2	0.1888	0.0789
9A8	0.1853	0.0356
22A14(200)	0.1848	0.0615
35 E2	0.1824	0.0682
2A12	0.1782	0.0658
35C1	0.1643	0.1251
22A14(201)	0.1634	0.0591
6A20	0.1498	0.0577
35B4	0.1492	0.0475
LE	0.1392	0.0692
22A17	0.1356	0.0391
47A1	0.1323	0.0629
7A6	0.1319	0.0689
lyso	0.1295	0.1016
22A13	0.1295	0.0474
30A5	0.1234	0.0904
ER	0.1184	0.0211
EE	0.115	0.0642
Golgi	0.1122	0.1401
39A2	0.1105	0.0456
1A6	0.1095	0.0263
35 E1	0.1013	0.0803
35A1	0.1013	0.1366
2A5(143)	0.0938	0.0196
35A5	0.0925	0.0205
mito	0.0714	0
24A6	0.0661	0.0258
5A10	0.0623	0.0286
38A1	0.061	0
SLC1A5	0.0558	0.0246
39A6	0.0489	0.0191
22A25	0.0424	0.0441
2A10	0.0352	0.0001
26A7	0.0268	0
6A11	0.0097	0
