# Supplementary material for: Localization, proteomics, and metabolite profiling reveal a putative vesicular transporter for UDP-glucose
Source: eLife. 2021 Jul 16;10:e65417. doi: 10.7554/eLife.65417 (PMC8373376; doi:10.7554/eLife.65417)
Supplement: Figure 2—source data 1. [file elife-65417-fig2-data1.xlsx]

## Sheet: Sheet1
Protein IDs	Majority protein IDs	Peptide counts (all)	Peptide counts (razor+unique)	Peptide counts (unique)	Fasta headers	Number of proteins	Peptides	Razor + unique peptides	Unique peptides	Peptides IgG1	Peptides IgG2	Peptides IgG3	Peptides SYP1	Peptides SYP2	Peptides SYP3	Razor + unique peptides IgG1	Razor + unique peptides IgG2	Razor + unique peptides IgG3	Razor + unique peptides SYP1	Razor + unique peptides SYP2	Razor + unique peptides SYP3	Unique peptides IgG1	Unique peptides IgG2	Unique peptides IgG3	Unique peptides SYP1	Unique peptides SYP2	Unique peptides SYP3	Sequence coverage [%]	Unique + razor sequence coverage [%]	Unique sequence coverage [%]	Mol. weight [kDa]	Sequence length	Sequence lengths	Q-value	Score	Sequence coverage IgG1 [%]	Sequence coverage IgG2 [%]	Sequence coverage IgG3 [%]	Sequence coverage SYP1 [%]	Sequence coverage SYP2 [%]	Sequence coverage SYP3 [%]	Intensity	Intensity IgG1	Intensity IgG2	Intensity IgG3	Intensity SYP1	Intensity SYP2	Intensity SYP3	LFQ intensity IgG1
sp|Q8BGN3|ENPP6_MOUSE	sp|Q8BGN3|ENPP6_MOUSE	13	13	13	sp|Q8BGN3|ENPP6_MOUSE Glycerophosphocholine cholinephosphodiesterase ENPP6 OS=Mus musculus OX=10090 GN=Enpp6 PE=1 SV=1	1	13	13	13	2	0	2	10	11	8	2	0	2	10	11	8	2	0	2	10	11	8	41.4	41.4	41.4	50.618	440	440	0	198.94	4.5	0	4.5	32.5	35.5	23.6	1920600000	0	0	17382000	681290000	834120000	387810000	0
sp|Q52KR3|PRUN2_MOUSE	sp|Q52KR3|PRUN2_MOUSE	3	3	3	sp|Q52KR3|PRUN2_MOUSE Protein prune homolog 2 OS=Mus musculus OX=10090 GN=Prune2 PE=1 SV=2	1	3	3	3	0	0	0	3	3	2	0	0	0	3	3	2	0	0	0	3	3	2	0.9	0.9	0.9	339.51	3084	3084	0	13.157	0	0	0	0.9	0.9	0.7	258540000	0	0	0	36439000	90585000	131520000	0
sp|Q9CQ22|LTOR1_MOUSE	sp|Q9CQ22|LTOR1_MOUSE	9	9	9	sp|Q9CQ22|LTOR1_MOUSE Ragulator complex protein LAMTOR1 OS=Mus musculus OX=10090 GN=Lamtor1 PE=1 SV=1	1	9	9	9	0	0	0	7	6	7	0	0	0	7	6	7	0	0	0	7	6	7	74.5	74.5	74.5	17.749	161	161	0	161.91	0	0	0	64.6	52.8	52.8	847330000	0	0	0	228430000	331930000	286970000	0
sp|P13595|NCAM1_MOUSE	sp|P13595|NCAM1_MOUSE	30	30	30	sp|P13595|NCAM1_MOUSE Neural cell adhesion molecule 1 OS=Mus musculus OX=10090 GN=Ncam1 PE=1 SV=3	1	30	30	30	5	1	5	25	24	22	5	1	5	25	24	22	5	1	5	25	24	22	40.1	40.1	40.1	119.43	1115	1115	0	323.31	5.1	1.1	4.9	36.1	33.7	32.6	4174700000	16970000	0	10661000	1298800000	1902400000	945890000	8419600
sp|Q922Q1|MARC2_MOUSE	sp|Q922Q1|MARC2_MOUSE	1	1	1	sp|Q922Q1|MARC2_MOUSE Mitochondrial amidoxime reducing component 2 OS=Mus musculus OX=10090 GN=Marc2 PE=1 SV=1	1	1	1	1	0	0	0	1	1	1	0	0	0	1	1	1	0	0	0	1	1	1	3	3	3	38.194	338	338	0.0055141	2.3772	0	0	0	3	3	3	14364000	0	0	0	3152300	5300300	5911100	0
sp|Q922S4|PDE2A_MOUSE	sp|Q922S4|PDE2A_MOUSE	38	38	38	sp|Q922S4|PDE2A_MOUSE cGMP-dependent 3,5-cyclic phosphodiesterase OS=Mus musculus OX=10090 GN=Pde2a PE=1 SV=4	1	38	38	38	3	1	2	31	27	30	3	1	2	31	27	30	3	1	2	31	27	30	52.8	52.8	52.8	105.62	939	939	0	323.31	2.3	1.5	2.9	48.2	37.3	41.2	6371200000	3052000	1111700	4900400	1721900000	1965900000	2674300000	403640
sp|P18052|PTPRA_MOUSE	sp|P18052|PTPRA_MOUSE	5	5	5	sp|P18052|PTPRA_MOUSE Receptor-type tyrosine-protein phosphatase alpha OS=Mus musculus OX=10090 GN=Ptpra PE=1 SV=3	1	5	5	5	0	0	0	2	2	5	0	0	0	2	2	5	0	0	0	2	2	5	6.6	6.6	6.6	93.696	829	829	0	8.0449	0	0	0	3	3.4	6.6	56428000	0	0	0	10558000	23768000	22103000	0
sp|Q5DQR4|STB5L_MOUSE;sp|Q3TJ91|L2GL2_MOUSE	sp|Q5DQR4|STB5L_MOUSE	38;1	38;1	37;1	sp|Q5DQR4|STB5L_MOUSE Syntaxin-binding protein 5-like OS=Mus musculus OX=10090 GN=Stxbp5l PE=1 SV=1	2	38	38	37	1	0	2	30	30	32	1	0	2	30	30	32	1	0	2	30	29	32	41.6	41.6	40.9	131.84	1185	1185;1027	0	323.31	1.4	0	2.9	36.5	35.9	36.7	4995300000	793330	0	9191700	1486400000	2223800000	1275100000	210630
sp|P61226|RAP2B_MOUSE;sp|Q8BU31|RAP2C_MOUSE	sp|P61226|RAP2B_MOUSE	9;4	9;4	5;0	sp|P61226|RAP2B_MOUSE Ras-related protein Rap-2b OS=Mus musculus OX=10090 GN=Rap2b PE=1 SV=1	2	9	9	5	0	0	0	5	7	5	0	0	0	5	7	5	0	0	0	3	3	2	62.8	62.8	36.6	20.504	183	183;183	0	120.6	0	0	0	35.5	48.1	29	698840000	0	0	0	238090000	225590000	235170000	0
sp|O08532|CA2D1_MOUSE	sp|O08532|CA2D1_MOUSE	23	23	23	sp|O08532|CA2D1_MOUSE Voltage-dependent calcium channel subunit alpha-2/delta-1 OS=Mus musculus OX=10090 GN=Cacna2d1 PE=1 SV=1	1	23	23	23	0	0	0	16	7	14	0	0	0	16	7	14	0	0	0	16	7	14	23.6	23.6	23.6	124.63	1103	1103	0	154.27	0	0	0	17.7	7.6	15.2	354320000	0	0	0	85910000	158510000	109890000	0
sp|Q9Z0P4|PALM_MOUSE	sp|Q9Z0P4|PALM_MOUSE	10	10	10	sp|Q9Z0P4|PALM_MOUSE Paralemmin-1 OS=Mus musculus OX=10090 GN=Palm PE=1 SV=1	1	10	10	10	0	0	0	5	6	6	0	0	0	5	6	6	0	0	0	5	6	6	33.2	33.2	33.2	41.614	383	383	0	157.89	0	0	0	18	20.4	19.1	194050000	0	0	0	84391000	47243000	62418000	0
sp|Q8BGN5|NPAL3_MOUSE	sp|Q8BGN5|NPAL3_MOUSE	4	4	4	sp|Q8BGN5|NPAL3_MOUSE NIPA-like protein 3 OS=Mus musculus OX=10090 GN=Nipal3 PE=2 SV=1	1	4	4	4	0	0	0	3	2	2	0	0	0	3	2	2	0	0	0	3	2	2	17.6	17.6	17.6	44.807	410	410	0	102.18	0	0	0	15.6	4.1	10.2	672050000	0	0	0	146720000	267390000	257930000	0
sp|Q8BGU5|CCNY_MOUSE	sp|Q8BGU5|CCNY_MOUSE	6	6	6	sp|Q8BGU5|CCNY_MOUSE Cyclin-Y OS=Mus musculus OX=10090 GN=Ccny PE=1 SV=1	1	6	6	6	0	0	0	3	3	6	0	0	0	3	3	6	0	0	0	3	3	6	22	22	22	39.394	341	341	0	185.14	0	0	0	12.6	12.6	22	288040000	0	0	0	53881000	86851000	147300000	0
sp|Q64314|CD34_MOUSE	sp|Q64314|CD34_MOUSE	2	2	2	sp|Q64314|CD34_MOUSE Hematopoietic progenitor cell antigen CD34 OS=Mus musculus OX=10090 GN=Cd34 PE=1 SV=1	1	2	2	2	0	0	0	2	1	2	0	0	0	2	1	2	0	0	0	2	1	2	5.2	5.2	5.2	40.982	382	382	0.0010549	3.1936	0	0	0	5.2	2.9	5.2	21765000	0	0	0	8649600	2851200	10264000	0
sp|Q9CS84|NRX1A_MOUSE;sp|P0DI97|NRX1B_MOUSE	sp|Q9CS84|NRX1A_MOUSE	11;4	9;4	7;2	sp|Q9CS84|NRX1A_MOUSE Neurexin-1 OS=Mus musculus OX=10090 GN=Nrxn1 PE=1 SV=3	2	11	9	7	1	0	0	5	5	7	0	0	0	4	4	6	0	0	0	4	3	5	9	7.7	6	166.17	1514	1514;468	0	20.728	0.7	0	0	3.7	4.9	5.9	67083000	0	0	0	10523000	31702000	24858000	0
sp|Q99PU5|ACBG1_MOUSE	sp|Q99PU5|ACBG1_MOUSE	54	54	54	sp|Q99PU5|ACBG1_MOUSE Long-chain-fatty-acid--CoA ligase ACSBG1 OS=Mus musculus OX=10090 GN=Acsbg1 PE=1 SV=1	1	54	54	54	16	2	8	47	46	50	16	2	8	47	46	50	16	2	8	47	46	50	68.9	68.9	68.9	80.425	721	721	0	323.31	30.8	3.6	15.3	68.8	63	65.3	68249000000	230430000	5655100	54216000	22530000000	23747000000	21682000000	92636000
sp|Q9JJK2|LANC2_MOUSE	sp|Q9JJK2|LANC2_MOUSE	23	23	23	sp|Q9JJK2|LANC2_MOUSE LanC-like protein 2 OS=Mus musculus OX=10090 GN=Lancl2 PE=1 SV=1	1	23	23	23	7	0	4	17	23	20	7	0	4	17	23	20	7	0	4	17	23	20	72.4	72.4	72.4	50.777	450	450	0	323.31	20.7	0	12	48.4	72.4	66.7	5122500000	63599000	0	64172000	1167100000	2171600000	1656000000	24053000
sp|Q3TDK6|ROGDI_MOUSE	sp|Q3TDK6|ROGDI_MOUSE	22	22	22	sp|Q3TDK6|ROGDI_MOUSE Protein rogdi homolog OS=Mus musculus OX=10090 GN=Rogdi PE=1 SV=2	1	22	22	22	7	0	8	19	21	20	7	0	8	19	21	20	7	0	8	19	21	20	69.7	69.7	69.7	32.1	287	287	0	323.31	35.2	0	38	69	69.7	69	12580000000	26353000	0	63651000	2840000000	4670900000	4979200000	26979000
sp|P42567|EPS15_MOUSE	sp|P42567|EPS15_MOUSE	16	16	16	sp|P42567|EPS15_MOUSE Epidermal growth factor receptor substrate 15 OS=Mus musculus OX=10090 GN=Eps15 PE=1 SV=1	1	16	16	16	0	0	0	6	11	13	0	0	0	6	11	13	0	0	0	6	11	13	25.5	25.5	25.5	98.47	897	897	0	323.31	0	0	0	10.8	18.4	23.2	343690000	0	0	0	67054000	171820000	104810000	0
sp|Q99JI6|RAP1B_MOUSE	sp|Q99JI6|RAP1B_MOUSE	9	2	2	sp|Q99JI6|RAP1B_MOUSE Ras-related protein Rap-1b OS=Mus musculus OX=10090 GN=Rap1b PE=1 SV=2	1	9	2	2	2	3	2	6	9	8	0	0	0	1	2	1	0	0	0	1	2	1	55.4	21.2	21.2	20.825	184	184	0	7.9791	12.5	13.6	13.6	26.6	55.4	41.3	179760000	0	0	0	43091000	65634000	71037000	0
sp|Q99L04|DHRS1_MOUSE	sp|Q99L04|DHRS1_MOUSE	24	24	24	sp|Q99L04|DHRS1_MOUSE Dehydrogenase/reductase SDR family member 1 OS=Mus musculus OX=10090 GN=Dhrs1 PE=1 SV=1	1	24	24	24	1	0	0	21	23	21	1	0	0	21	23	21	1	0	0	21	23	21	78.9	78.9	78.9	34.005	313	313	0	323.31	3.8	0	0	74.4	77.3	73.8	8191600000	2855500	0	0	1882700000	3553400000	2752700000	2552300
sp|Q8BI08|MAL2_MOUSE	sp|Q8BI08|MAL2_MOUSE	2	2	2	sp|Q8BI08|MAL2_MOUSE Protein MAL2 OS=Mus musculus OX=10090 GN=Mal2 PE=1 SV=1	1	2	2	2	1	1	1	2	2	2	1	1	1	2	2	2	1	1	1	2	2	2	17.7	17.7	17.7	19.094	175	175	0	46.346	6.3	11.4	11.4	17.7	17.7	17.7	15220000000	2642300	2819400	4350100	4214300000	5154000000	5841700000	1780200
sp|Q8K3X4|I2BPL_MOUSE	sp|Q8K3X4|I2BPL_MOUSE	31	30	26	sp|Q8K3X4|I2BPL_MOUSE Probable E3 ubiquitin-protein ligase IRF2BPL OS=Mus musculus OX=10090 GN=Irf2bpl PE=1 SV=1	1	31	30	26	7	0	7	31	24	27	7	0	7	30	23	26	7	0	7	26	19	22	55.9	55	48.3	80.564	775	775	0	323.31	12.9	0	14.6	55.9	48.9	52.3	11373000000	30055000	0	40919000	3284900000	4094200000	3923200000	13181000
sp|Q9JIZ9|PLS3_MOUSE	sp|Q9JIZ9|PLS3_MOUSE	2	2	2	sp|Q9JIZ9|PLS3_MOUSE Phospholipid scramblase 3 OS=Mus musculus OX=10090 GN=Plscr3 PE=1 SV=1	1	2	2	2	0	0	0	1	2	2	0	0	0	1	2	2	0	0	0	1	2	2	8.1	8.1	8.1	31.802	296	296	0	4.7043	0	0	0	3.7	8.1	8.1	64287000	0	0	0	5124400	29541000	29622000	0
sp|Q99NF1|BCDO2_MOUSE	sp|Q99NF1|BCDO2_MOUSE	4	4	4	sp|Q99NF1|BCDO2_MOUSE Beta,beta-carotene 9,10-oxygenase OS=Mus musculus OX=10090 GN=Bco2 PE=1 SV=1	1	4	4	4	0	0	0	4	3	2	0	0	0	4	3	2	0	0	0	4	3	2	6.6	6.6	6.6	60.142	532	532	0	7.8383	0	0	0	6.6	6.4	4.3	433440000	0	0	0	157680000	259070000	16691000	0
sp|Q80V42|CBPM_MOUSE	sp|Q80V42|CBPM_MOUSE	12	12	12	sp|Q80V42|CBPM_MOUSE Carboxypeptidase M OS=Mus musculus OX=10090 GN=Cpm PE=1 SV=2	1	12	12	12	0	0	0	10	8	6	0	0	0	10	8	6	0	0	0	10	8	6	27.8	27.8	27.8	50.555	443	443	0	105.44	0	0	0	25.1	22.3	17.6	767920000	0	0	0	262160000	305580000	200180000	0
sp|Q64444|CAH4_MOUSE	sp|Q64444|CAH4_MOUSE	5	5	5	sp|Q64444|CAH4_MOUSE Carbonic anhydrase 4 OS=Mus musculus OX=10090 GN=Ca4 PE=1 SV=1	1	5	5	5	0	0	0	4	3	4	0	0	0	4	3	4	0	0	0	4	3	4	21.6	21.6	21.6	34.351	305	305	0	30.518	0	0	0	18	15.1	18	305120000	0	0	0	75741000	45530000	183850000	0
sp|Q9CYZ2|TPD54_MOUSE	sp|Q9CYZ2|TPD54_MOUSE	28	28	28	sp|Q9CYZ2|TPD54_MOUSE Tumor protein D54 OS=Mus musculus OX=10090 GN=Tpd52l2 PE=1 SV=1	1	28	28	28	3	0	2	23	21	25	3	0	2	23	21	25	3	0	2	23	21	25	87.7	87.7	87.7	24.043	220	220	0	323.31	19.5	0	15	85.5	80.5	82.7	42635000000	13857000	0	9155100	10138000000	15393000000	17081000000	13669000
sp|E9Q1P8|I2BP2_MOUSE	sp|E9Q1P8|I2BP2_MOUSE	29	24	24	sp|E9Q1P8|I2BP2_MOUSE Interferon regulatory factor 2-binding protein 2 OS=Mus musculus OX=10090 GN=Irf2bp2 PE=1 SV=1	1	29	24	24	2	0	3	23	24	25	2	0	3	18	19	20	2	0	3	18	19	20	68.2	57.9	57.9	59.291	570	570	0	323.31	7.2	0	8.9	55.6	60.2	63.2	3992600000	4530000	0	9005100	1178800000	1178200000	1622100000	1794000
sp|Q64008|RAB34_MOUSE	sp|Q64008|RAB34_MOUSE	5	5	5	sp|Q64008|RAB34_MOUSE Ras-related protein Rab-34 OS=Mus musculus OX=10090 GN=Rab34 PE=1 SV=2	1	5	5	5	0	0	0	5	1	4	0	0	0	5	1	4	0	0	0	5	1	4	23.9	23.9	23.9	29.1	259	259	0	12.954	0	0	0	23.9	5.8	19.7	97514000	0	0	0	40159000	25312000	32043000	0
sp|Q8R3Y8|I2BP1_MOUSE	sp|Q8R3Y8|I2BP1_MOUSE	44	44	43	sp|Q8R3Y8|I2BP1_MOUSE Interferon regulatory factor 2-binding protein 1 OS=Mus musculus OX=10090 GN=Irf2bp1 PE=1 SV=2	1	44	44	43	4	0	10	39	41	38	4	0	10	39	41	38	4	0	10	38	40	37	81.5	81.5	80.3	61.75	584	584	0	323.31	12.7	0	23.3	80.5	81	81	99524000000	29761000	0	117270000	29663000000	39622000000	30093000000	13377000
sp|Q14BI2|GRM2_MOUSE;sp|Q68EF4|GRM4_MOUSE	sp|Q14BI2|GRM2_MOUSE	15;1	15;1	14;1	sp|Q14BI2|GRM2_MOUSE Metabotropic glutamate receptor 2 OS=Mus musculus OX=10090 GN=Grm2 PE=1 SV=2	2	15	15	14	0	0	0	9	9	9	0	0	0	9	9	9	0	0	0	8	8	8	18	18	16.3	95.886	872	872;912	0	31.097	0	0	0	11.4	10.2	11.5	348450000	0	0	0	98196000	156780000	93472000	0
sp|Q9QYK7|RNF11_MOUSE	sp|Q9QYK7|RNF11_MOUSE	2	2	2	sp|Q9QYK7|RNF11_MOUSE RING finger protein 11 OS=Mus musculus OX=10090 GN=Rnf11 PE=1 SV=1	1	2	2	2	0	0	0	2	1	1	0	0	0	2	1	1	0	0	0	2	1	1	13.6	13.6	13.6	17.458	154	154	0	6.0065	0	0	0	13.6	5.8	7.8	116110000	0	0	0	36284000	44412000	35412000	0
sp|Q61330|CNTN2_MOUSE	sp|Q61330|CNTN2_MOUSE	7	7	7	sp|Q61330|CNTN2_MOUSE Contactin-2 OS=Mus musculus OX=10090 GN=Cntn2 PE=1 SV=2	1	7	7	7	0	0	0	5	3	3	0	0	0	5	3	3	0	0	0	5	3	3	8.9	8.9	8.9	113.22	1040	1040	0	9.533	0	0	0	6.9	3.1	3.4	49300000	0	0	0	17508000	15655000	16137000	0
sp|Q640M6|GDPD5_MOUSE	sp|Q640M6|GDPD5_MOUSE	8	8	8	sp|Q640M6|GDPD5_MOUSE Glycerophosphodiester phosphodiesterase domain-containing protein 5 OS=Mus musculus OX=10090 GN=Gdpd5 PE=2 SV=1	1	8	8	8	0	0	0	6	7	6	0	0	0	6	7	6	0	0	0	6	7	6	16.6	16.6	16.6	68.889	607	607	0	26.171	0	0	0	11.9	14.7	12.4	715210000	0	0	0	206830000	218270000	290120000	0
sp|Q69ZS6|SV2C_MOUSE	sp|Q69ZS6|SV2C_MOUSE	19	18	18	sp|Q69ZS6|SV2C_MOUSE Synaptic vesicle glycoprotein 2C OS=Mus musculus OX=10090 GN=Sv2c PE=1 SV=2	1	19	18	18	0	0	0	16	14	15	0	0	0	15	13	14	0	0	0	15	13	14	28.7	28.7	28.7	82.29	727	727	0	323.31	0	0	0	27.6	20.9	23.5	8568000000	0	0	0	2308000000	2855900000	3404100000	0
sp|Q62433|NDRG1_MOUSE	sp|Q62433|NDRG1_MOUSE	7	7	7	sp|Q62433|NDRG1_MOUSE Protein NDRG1 OS=Mus musculus OX=10090 GN=Ndrg1 PE=1 SV=1	1	7	7	7	1	0	0	7	6	6	1	0	0	7	6	6	1	0	0	7	6	6	27.4	27.4	27.4	43.008	394	394	0	295.58	3.6	0	0	27.4	23.9	23.9	642370000	0	0	0	124620000	292040000	225710000	0
sp|O54818|TPD53_MOUSE	sp|O54818|TPD53_MOUSE	12	12	12	sp|O54818|TPD53_MOUSE Tumor protein D53 OS=Mus musculus OX=10090 GN=Tpd52l1 PE=1 SV=1	1	12	12	12	1	0	1	11	8	9	1	0	1	11	8	9	1	0	1	11	8	9	74	74	74	22.515	204	204	0	323.31	6.9	0	6.9	74	48.5	51	4347300000	0	0	2543600	1219100000	1420700000	1705000000	0
sp|P63044|VAMP2_MOUSE	sp|P63044|VAMP2_MOUSE	14	14	6	sp|P63044|VAMP2_MOUSE Vesicle-associated membrane protein 2 OS=Mus musculus OX=10090 GN=Vamp2 PE=1 SV=2	1	14	14	6	7	6	7	12	13	12	7	6	7	12	13	12	4	3	4	5	5	5	72.4	72.4	47.4	12.691	116	116	0	323.31	60.3	60.3	60.3	70.7	72.4	70.7	212990000000	115660000	71464000	184510000	48358000000	75353000000	88908000000	54353000
sp|Q6PIC6|AT1A3_MOUSE;sp|Q9Z1W8|AT12A_MOUSE	sp|Q6PIC6|AT1A3_MOUSE	56;5	56;5	37;0	sp|Q6PIC6|AT1A3_MOUSE Sodium/potassium-transporting ATPase subunit alpha-3 OS=Mus musculus OX=10090 GN=Atp1a3 PE=1 SV=1	2	56	56	37	13	5	13	54	43	50	13	5	13	54	43	50	3	1	6	35	26	32	53.9	53.9	34.3	111.69	1013	1013;1035	0	323.31	16.1	6.3	18.4	53.9	46.7	46.8	28821000000	75251000	42302000	155390000	9814400000	8515100000	10219000000	40657000
sp|Q62277|SYPH_MOUSE	sp|Q62277|SYPH_MOUSE	11	11	11	sp|Q62277|SYPH_MOUSE Synaptophysin OS=Mus musculus OX=10090 GN=Syp PE=1 SV=2	1	11	11	11	3	1	2	9	11	11	3	1	2	9	11	11	3	1	2	9	11	11	33.1	33.1	33.1	34.024	314	314	0	323.31	10.5	3.2	6.4	25.5	33.1	33.1	247680000000	73248000	9659700	43816000	54050000000	83976000000	109530000000	53236000
sp|Q7M759|AB17B_MOUSE	sp|Q7M759|AB17B_MOUSE	15	15	15	sp|Q7M759|AB17B_MOUSE Alpha/beta hydrolase domain-containing protein 17B OS=Mus musculus OX=10090 GN=Abhd17b PE=1 SV=1	1	15	15	15	0	0	0	7	6	14	0	0	0	7	6	14	0	0	0	7	6	14	74	74	74	32.2	288	288	0	188.16	0	0	0	38.9	28.5	70.1	1316800000	0	0	0	266180000	382940000	667680000	0
sp|Q9QUR8|SEM7A_MOUSE	sp|Q9QUR8|SEM7A_MOUSE	10	10	10	sp|Q9QUR8|SEM7A_MOUSE Semaphorin-7A OS=Mus musculus OX=10090 GN=Sema7a PE=1 SV=1	1	10	10	10	0	0	0	9	2	4	0	0	0	9	2	4	0	0	0	9	2	4	18.7	18.7	18.7	74.993	664	664	0	27.365	0	0	0	16.4	5.4	9.2	145060000	0	0	0	44907000	54249000	45909000	0
sp|D3YVF0|AKAP5_MOUSE	sp|D3YVF0|AKAP5_MOUSE	19	19	19	sp|D3YVF0|AKAP5_MOUSE A-kinase anchor protein 5 OS=Mus musculus OX=10090 GN=Akap5 PE=1 SV=2	1	19	19	19	0	0	1	15	13	13	0	0	1	15	13	13	0	0	1	15	13	13	48.2	48.2	48.2	79.396	745	745	0	323.31	0	0	3.5	39.6	38.8	37.4	854410000	0	0	1401500	196390000	467810000	188810000	0
sp|Q8BH82|NAPEP_MOUSE	sp|Q8BH82|NAPEP_MOUSE	22	22	22	sp|Q8BH82|NAPEP_MOUSE N-acyl-phosphatidylethanolamine-hydrolyzing phospholipase D OS=Mus musculus OX=10090 GN=Napepld PE=1 SV=1	1	22	22	22	0	0	0	13	17	20	0	0	0	13	17	20	0	0	0	13	17	20	63.4	63.4	63.4	45.815	396	396	0	265.87	0	0	0	38.9	49.7	59.8	3731400000	0	0	0	580370000	1052700000	2098400000	0
sp|Q3TDN2|FAF2_MOUSE	sp|Q3TDN2|FAF2_MOUSE	12	12	12	sp|Q3TDN2|FAF2_MOUSE FAS-associated factor 2 OS=Mus musculus OX=10090 GN=Faf2 PE=1 SV=2	1	12	12	12	0	0	0	11	8	5	0	0	0	11	8	5	0	0	0	11	8	5	37.5	37.5	37.5	52.471	445	445	0	153.35	0	0	0	37.3	28.3	18	528110000	0	0	0	196170000	236470000	95461000	0
sp|Q9JKF6|NECT1_MOUSE	sp|Q9JKF6|NECT1_MOUSE	2	2	2	sp|Q9JKF6|NECT1_MOUSE Nectin-1 OS=Mus musculus OX=10090 GN=Nectin1 PE=1 SV=3	1	2	2	2	0	0	0	2	1	2	0	0	0	2	1	2	0	0	0	2	1	2	5.8	5.8	5.8	57.034	515	515	0.0027211	2.8297	0	0	0	5.8	1.6	5.8	75625000	0	0	0	24564000	9091700	41970000	0
sp|O54991|CNTP1_MOUSE	sp|O54991|CNTP1_MOUSE	14	14	14	sp|O54991|CNTP1_MOUSE Contactin-associated protein 1 OS=Mus musculus OX=10090 GN=Cntnap1 PE=1 SV=2	1	14	14	14	1	0	0	7	5	10	1	0	0	7	5	10	1	0	0	7	5	10	14	14	14	156.31	1385	1385	0	132.79	1.1	0	0	7.1	4.6	10.4	137230000	1797000	0	0	34580000	47091000	53761000	0
sp|P0C7M9|CLC2L_MOUSE	sp|P0C7M9|CLC2L_MOUSE	7	7	7	sp|P0C7M9|CLC2L_MOUSE C-type lectin domain family 2 member L OS=Mus musculus OX=10090 GN=Clec2l PE=1 SV=1	1	7	7	7	0	0	0	3	5	5	0	0	0	3	5	5	0	0	0	3	5	5	35.5	35.5	35.5	23.653	211	211	0	21.21	0	0	0	18.5	30.3	27	287940000	0	0	0	59019000	110570000	118350000	0
sp|Q61735|CD47_MOUSE	sp|Q61735|CD47_MOUSE	3	3	3	sp|Q61735|CD47_MOUSE Leukocyte surface antigen CD47 OS=Mus musculus OX=10090 GN=Cd47 PE=1 SV=2	1	3	3	3	0	0	0	3	3	3	0	0	0	3	3	3	0	0	0	3	3	3	12.2	12.2	12.2	33.097	303	303	0	244.81	0	0	0	12.2	12.2	12.2	1452700000	0	0	0	292820000	439410000	720440000	0
sp|Q3TLI0|TPC10_MOUSE	sp|Q3TLI0|TPC10_MOUSE	18	18	18	sp|Q3TLI0|TPC10_MOUSE Trafficking protein particle complex subunit 10 OS=Mus musculus OX=10090 GN=Trappc10 PE=1 SV=2	1	18	18	18	0	0	0	11	9	11	0	0	0	11	9	11	0	0	0	11	9	11	21	21	21	141.59	1259	1259	0	85.94	0	0	0	11.7	11.3	13.1	138340000	0	0	0	38549000	56672000	43124000	0
sp|Q8BG39|SV2B_MOUSE	sp|Q8BG39|SV2B_MOUSE	30	30	29	sp|Q8BG39|SV2B_MOUSE Synaptic vesicle glycoprotein 2B OS=Mus musculus OX=10090 GN=Sv2b PE=1 SV=1	1	30	30	29	2	0	1	28	23	29	2	0	1	28	23	29	2	0	1	27	22	28	47.3	47.3	47.3	77.456	683	683	0	323.31	3.2	0	1.2	43.3	36.2	41.6	78473000000	6187500	0	2937000	21514000000	24576000000	32374000000	962650
sp|Q8BHC1|RB39B_MOUSE;sp|Q8R1M8|MPTX_MOUSE	sp|Q8BHC1|RB39B_MOUSE	13;1	13;1	12;1	sp|Q8BHC1|RB39B_MOUSE Ras-related protein Rab-39B OS=Mus musculus OX=10090 GN=Rab39b PE=1 SV=1	2	13	13	12	0	0	0	11	11	11	0	0	0	11	11	11	0	0	0	10	10	10	62.9	62.9	57.7	24.636	213	213;219	0	214.79	0	0	0	52.1	59.6	59.6	2717900000	0	0	0	624550000	928010000	1165300000	0
sp|Q8BVA5|LDAH_MOUSE	sp|Q8BVA5|LDAH_MOUSE	15	15	15	sp|Q8BVA5|LDAH_MOUSE Lipid droplet-associated hydrolase OS=Mus musculus OX=10090 GN=Ldah PE=1 SV=1	1	15	15	15	0	0	0	11	10	14	0	0	0	11	10	14	0	0	0	11	10	14	51.5	51.5	51.5	37.374	326	326	0	168.59	0	0	0	41.4	36.5	49.1	1474500000	0	0	0	392090000	401600000	680800000	0
sp|Q6PDC8|MFD4A_MOUSE	sp|Q6PDC8|MFD4A_MOUSE	8	8	8	sp|Q6PDC8|MFD4A_MOUSE Major facilitator superfamily domain-containing protein 4A OS=Mus musculus OX=10090 GN=Mfsd4a PE=2 SV=2	1	8	8	8	0	0	0	6	4	5	0	0	0	6	4	5	0	0	0	6	4	5	20	20	20	56.183	510	510	0	16.022	0	0	0	14.1	11.4	14.5	414700000	0	0	0	71665000	138690000	204340000	0
sp|E9PUL5|PRRT2_MOUSE	sp|E9PUL5|PRRT2_MOUSE	7	7	7	sp|E9PUL5|PRRT2_MOUSE Proline-rich transmembrane protein 2 OS=Mus musculus OX=10090 GN=Prrt2 PE=1 SV=1	1	7	7	7	0	0	0	7	6	6	0	0	0	7	6	6	0	0	0	7	6	6	33.8	33.8	33.8	35.923	346	346	0	256.29	0	0	0	33.8	31.8	31.8	735530000	0	0	0	222410000	219920000	293200000	0
sp|Q9D0I4|STX17_MOUSE	sp|Q9D0I4|STX17_MOUSE	13	13	13	sp|Q9D0I4|STX17_MOUSE Syntaxin-17 OS=Mus musculus OX=10090 GN=Stx17 PE=1 SV=1	1	13	13	13	2	0	2	11	11	12	2	0	2	11	11	12	2	0	2	11	11	12	57.8	57.8	57.8	33.221	301	301	0	323.31	11	0	13	53.2	49.8	54.5	2412100000	5357200	0	13091000	439630000	792430000	1161600000	5052900
sp|Q6NXK7|DPP10_MOUSE	sp|Q6NXK7|DPP10_MOUSE	25	24	24	sp|Q6NXK7|DPP10_MOUSE Inactive dipeptidyl peptidase 10 OS=Mus musculus OX=10090 GN=Dpp10 PE=1 SV=1	1	25	24	24	0	0	0	21	13	21	0	0	0	20	12	20	0	0	0	20	12	20	35.6	34.5	34.5	90.825	797	797	0	90.712	0	0	0	28.9	19.7	30.7	1656100000	0	0	0	423610000	448660000	783860000	0
sp|Q8VCH8|UBXN4_MOUSE	sp|Q8VCH8|UBXN4_MOUSE	5	5	5	sp|Q8VCH8|UBXN4_MOUSE UBX domain-containing protein 4 OS=Mus musculus OX=10090 GN=Ubxn4 PE=1 SV=1	1	5	5	5	0	0	0	3	3	3	0	0	0	3	3	3	0	0	0	3	3	3	14.2	14.2	14.2	56.471	506	506	0	229.17	0	0	0	7.3	11.1	9.1	258850000	0	0	0	73522000	112270000	73067000	0
sp|Q8BHH2|RAB9B_MOUSE	sp|Q8BHH2|RAB9B_MOUSE	4	4	4	sp|Q8BHH2|RAB9B_MOUSE Ras-related protein Rab-9B OS=Mus musculus OX=10090 GN=Rab9b PE=1 SV=1	1	4	4	4	0	0	0	3	3	4	0	0	0	3	3	4	0	0	0	3	3	4	22.9	22.9	22.9	22.704	201	201	0	178.86	0	0	0	20.4	20.4	22.9	412710000	0	0	0	110250000	138260000	164200000	0
sp|Q8BXR1|S7A14_MOUSE	sp|Q8BXR1|S7A14_MOUSE	13	13	13	sp|Q8BXR1|S7A14_MOUSE Probable cationic amino acid transporter OS=Mus musculus OX=10090 GN=Slc7a14 PE=1 SV=1	1	13	13	13	0	0	1	13	10	11	0	0	1	13	10	11	0	0	1	13	10	11	20.6	20.6	20.6	83.983	771	771	0	275.2	0	0	1.3	20.6	15.4	15.4	6622300000	0	0	1149900	2383400000	1847400000	2390400000	0
sp|P62874|GBB1_MOUSE;sp|Q61011|GBB3_MOUSE	sp|P62874|GBB1_MOUSE	19;2	19;2	12;0	sp|P62874|GBB1_MOUSE Guanine nucleotide-binding protein G(I)/G(S)/G(T) subunit beta-1 OS=Mus musculus OX=10090 GN=Gnb1 PE=1 SV=3	2	19	19	12	7	3	9	17	19	19	7	3	9	17	19	19	6	3	6	11	12	12	68.5	68.5	41.2	37.377	340	340;340	0	323.31	18.2	11.2	23.2	68.5	68.5	68.5	25838000000	76810000	8445200	240410000	4807200000	7841000000	12864000000	91341000
sp|Q80ZJ1|RAP2A_MOUSE	sp|Q80ZJ1|RAP2A_MOUSE	8	4	4	sp|Q80ZJ1|RAP2A_MOUSE Ras-related protein Rap-2a OS=Mus musculus OX=10090 GN=Rap2a PE=1 SV=2	1	8	4	4	0	0	0	5	7	7	0	0	0	3	3	4	0	0	0	3	3	4	50.3	24	24	20.642	183	183	0	38.307	0	0	0	32.2	50.3	36.1	257550000	0	0	0	88667000	71249000	97630000	0
sp|P97950|RB33A_MOUSE	sp|P97950|RB33A_MOUSE	8	6	6	sp|P97950|RB33A_MOUSE Ras-related protein Rab-33A OS=Mus musculus OX=10090 GN=Rab33a PE=2 SV=1	1	8	6	6	1	0	0	5	5	7	0	0	0	3	4	5	0	0	0	3	4	5	35.9	27	27	26.54	237	237	0	14.811	4.6	0	0	22.8	24.1	31.6	221070000	0	0	0	47968000	71163000	101940000	0
sp|Q9Z1G4|VPP1_MOUSE;sp|Q920R6|VPP4_MOUSE	sp|Q9Z1G4|VPP1_MOUSE	61;3	61;3	59;2	sp|Q9Z1G4|VPP1_MOUSE V-type proton ATPase 116 kDa subunit a isoform 1 OS=Mus musculus OX=10090 GN=Atp6v0a1 PE=1 SV=3	2	61	61	59	14	4	15	56	43	52	14	4	15	56	43	52	13	4	13	54	41	50	54.6	54.6	53.6	96.466	839	839;833	0	323.31	20.6	5.2	20.9	49.9	43.5	50.9	259620000000	97048000	20198000	218150000	78390000000	90763000000	90134000000	56835000
sp|P97441|ZNT3_MOUSE	sp|P97441|ZNT3_MOUSE	16	16	16	sp|P97441|ZNT3_MOUSE Zinc transporter 3 OS=Mus musculus OX=10090 GN=Slc30a3 PE=1 SV=1	1	16	16	16	0	0	0	12	13	15	0	0	0	12	13	15	0	0	0	12	13	15	35.3	35.3	35.3	41.824	388	388	0	323.31	0	0	0	34.8	34.8	35.3	16421000000	0	0	0	4272400000	6153800000	5995100000	0
sp|O35239|PTN9_MOUSE	sp|O35239|PTN9_MOUSE	36	36	36	sp|O35239|PTN9_MOUSE Tyrosine-protein phosphatase non-receptor type 9 OS=Mus musculus OX=10090 GN=Ptpn9 PE=1 SV=2	1	36	36	36	2	0	1	30	29	33	2	0	1	30	29	33	2	0	1	30	29	33	67.3	67.3	67.3	67.969	593	593	0	323.31	3.7	0	1.9	62.1	59	64.1	21638000000	14386000	0	3586800	6020500000	6585100000	9014200000	2065600
sp|Q9Z218|DPP6_MOUSE	sp|Q9Z218|DPP6_MOUSE	33	33	32	sp|Q9Z218|DPP6_MOUSE Dipeptidyl aminopeptidase-like protein 6 OS=Mus musculus OX=10090 GN=Dpp6 PE=1 SV=1	1	33	33	32	0	0	0	28	20	24	0	0	0	28	20	24	0	0	0	27	19	23	47	47	45.9	91.259	804	804	0	323.31	0	0	0	40.9	31.6	34.6	5148400000	0	0	0	1841000000	1439300000	1868200000	0
sp|Q80XR2|AT2C1_MOUSE	sp|Q80XR2|AT2C1_MOUSE	21	21	21	sp|Q80XR2|AT2C1_MOUSE Calcium-transporting ATPase type 2C member 1 OS=Mus musculus OX=10090 GN=Atp2c1 PE=1 SV=2	1	21	21	21	2	0	1	18	10	17	2	0	1	18	10	17	2	0	1	18	10	17	32.8	32.8	32.8	100.3	918	918	0	237.29	2.7	0	1.2	28.1	17	28.2	1102100000	0	0	0	389270000	212340000	500510000	0
sp|P62488|RPB7_MOUSE	sp|P62488|RPB7_MOUSE	3	3	3	sp|P62488|RPB7_MOUSE DNA-directed RNA polymerase II subunit RPB7 OS=Mus musculus OX=10090 GN=Polr2g PE=1 SV=1	1	3	3	3	0	0	0	2	1	2	0	0	0	2	1	2	0	0	0	2	1	2	19.2	19.2	19.2	19.294	172	172	0	24.856	0	0	0	14.5	7	19.2	47480000	0	0	0	13078000	11103000	23299000	0
sp|Q9JKD3|SCAM5_MOUSE	sp|Q9JKD3|SCAM5_MOUSE	6	6	6	sp|Q9JKD3|SCAM5_MOUSE Secretory carrier-associated membrane protein 5 OS=Mus musculus OX=10090 GN=Scamp5 PE=1 SV=1	1	6	6	6	0	1	1	5	6	6	0	1	1	5	6	6	0	1	1	5	6	6	37.4	37.4	37.4	26.068	235	235	0	231.47	0	4.7	4.7	37	37.4	37.4	36205000000	0	2900600	11423000	7725700000	14475000000	13991000000	0
sp|Q9JIS5|SV2A_MOUSE	sp|Q9JIS5|SV2A_MOUSE	36	36	36	sp|Q9JIS5|SV2A_MOUSE Synaptic vesicle glycoprotein 2A OS=Mus musculus OX=10090 GN=Sv2a PE=1 SV=1	1	36	36	36	6	1	6	34	28	32	6	1	6	34	28	32	6	1	6	34	28	32	51.1	51.1	51.1	82.646	742	742	0	323.31	8.1	1.3	9.6	50.8	41.5	45.6	199300000000	40621000	3785000	66553000	58411000000	64249000000	76529000000	24165000
sp|P98200|AT8A2_MOUSE	sp|P98200|AT8A2_MOUSE	14	13	13	sp|P98200|AT8A2_MOUSE Phospholipid-transporting ATPase IB OS=Mus musculus OX=10090 GN=Atp8a2 PE=1 SV=1	1	14	13	13	1	0	0	8	10	13	0	0	0	7	9	12	0	0	0	7	9	12	13.9	12.9	12.9	129.42	1148	1148	0	36.304	1	0	0	8.5	9.8	12.9	222750000	0	0	0	40235000	81245000	101270000	0
sp|P21956|MFGM_MOUSE	sp|P21956|MFGM_MOUSE	10	10	10	sp|P21956|MFGM_MOUSE Lactadherin OS=Mus musculus OX=10090 GN=Mfge8 PE=1 SV=3	1	10	10	10	0	0	0	7	5	8	0	0	0	7	5	8	0	0	0	7	5	8	23.3	23.3	23.3	51.24	463	463	0	23.47	0	0	0	17.7	11.2	17.7	271550000	0	0	0	112070000	48532000	110940000	0
sp|P97300|NPTN_MOUSE	sp|P97300|NPTN_MOUSE	7	7	7	sp|P97300|NPTN_MOUSE Neuroplastin OS=Mus musculus OX=10090 GN=Nptn PE=1 SV=3	1	7	7	7	0	0	0	5	3	5	0	0	0	5	3	5	0	0	0	5	3	5	21.7	21.7	21.7	44.373	397	397	0	18.965	0	0	0	17.1	10.1	14.6	316770000	0	0	0	108340000	88899000	119530000	0
sp|Q9JJR8|TMM9B_MOUSE	sp|Q9JJR8|TMM9B_MOUSE	4	4	4	sp|Q9JJR8|TMM9B_MOUSE Transmembrane protein 9B OS=Mus musculus OX=10090 GN=Tmem9b PE=1 SV=1	1	4	4	4	0	0	0	3	3	4	0	0	0	3	3	4	0	0	0	3	3	4	33.2	33.2	33.2	22.607	199	199	0	18.795	0	0	0	18.6	26.1	33.2	217430000	0	0	0	48574000	55529000	113330000	0
sp|P70280|VAMP7_MOUSE	sp|P70280|VAMP7_MOUSE	17	17	17	sp|P70280|VAMP7_MOUSE Vesicle-associated membrane protein 7 OS=Mus musculus OX=10090 GN=Vamp7 PE=1 SV=1	1	17	17	17	0	0	0	13	12	17	0	0	0	13	12	17	0	0	0	13	12	17	70.5	70.5	70.5	24.967	220	220	0	323.31	0	0	0	59.1	64.5	70.5	2022900000	0	0	0	487000000	711570000	824340000	0
sp|Q7TSY6|CELF4_MOUSE;sp|Q7TN33|CELF6_MOUSE	sp|Q7TSY6|CELF4_MOUSE	7;1	7;1	6;1	sp|Q7TSY6|CELF4_MOUSE CUGBP Elav-like family member 4 OS=Mus musculus OX=10090 GN=Celf4 PE=1 SV=2	2	7	7	6	1	0	0	6	2	2	1	0	0	6	2	2	1	0	0	5	1	2	16.3	16.3	13.8	51.932	486	486;460	0	13.147	2.1	0	0	14.2	4.1	3.5	129230000	0	0	0	74292000	31575000	23360000	0
sp|P31648|SC6A1_MOUSE	sp|P31648|SC6A1_MOUSE	2	2	2	sp|P31648|SC6A1_MOUSE Sodium- and chloride-dependent GABA transporter 1 OS=Mus musculus OX=10090 GN=Slc6a1 PE=1 SV=2	1	2	2	2	0	0	0	1	2	2	0	0	0	1	2	2	0	0	0	1	2	2	5.5	5.5	5.5	67.001	599	599	0	7.5215	0	0	0	3.5	5.5	5.5	90863000	0	0	0	19114000	25280000	46469000	0
sp|Q3UHK1|MYCT_MOUSE	sp|Q3UHK1|MYCT_MOUSE	15	15	15	sp|Q3UHK1|MYCT_MOUSE Proton myo-inositol cotransporter OS=Mus musculus OX=10090 GN=Slc2a13 PE=1 SV=2	1	15	15	15	0	0	0	14	8	13	0	0	0	14	8	13	0	0	0	14	8	13	25.3	25.3	25.3	69.062	637	637	0	128.36	0	0	0	21.7	17.4	22.8	1272300000	0	0	0	388690000	283680000	599980000	0
sp|P56818|BACE1_MOUSE	sp|P56818|BACE1_MOUSE	6	6	6	sp|P56818|BACE1_MOUSE Beta-secretase 1 OS=Mus musculus OX=10090 GN=Bace1 PE=1 SV=2	1	6	6	6	0	0	0	5	3	5	0	0	0	5	3	5	0	0	0	5	3	5	14.8	14.8	14.8	55.747	501	501	0	111.3	0	0	0	12.8	7.2	12.6	409080000	0	0	0	210690000	58072000	140320000	0
sp|Q91WL8|WWOX_MOUSE	sp|Q91WL8|WWOX_MOUSE	17	17	17	sp|Q91WL8|WWOX_MOUSE WW domain-containing oxidoreductase OS=Mus musculus OX=10090 GN=Wwox PE=1 SV=1	1	17	17	17	0	0	0	9	11	15	0	0	0	9	11	15	0	0	0	9	11	15	44	44	44	46.512	414	414	0	114.55	0	0	0	24.2	33.8	38.9	721610000	0	0	0	62034000	216660000	442910000	0
sp|Q62393|TPD52_MOUSE	sp|Q62393|TPD52_MOUSE	14	14	14	sp|Q62393|TPD52_MOUSE Tumor protein D52 OS=Mus musculus OX=10090 GN=Tpd52 PE=1 SV=2	1	14	14	14	1	0	0	11	12	13	1	0	0	11	12	13	1	0	0	11	12	13	68.3	68.3	68.3	24.313	224	224	0	323.31	6.2	0	0	62.9	46.4	68.3	35170000000	2258900	0	0	10834000000	11275000000	13059000000	2152900
sp|Q8BYM5|NLGN3_MOUSE;sp|Q99K10|NLGN1_MOUSE	sp|Q8BYM5|NLGN3_MOUSE	4;1	4;1	3;1	sp|Q8BYM5|NLGN3_MOUSE Neuroligin-3 OS=Mus musculus OX=10090 GN=Nlgn3 PE=1 SV=2	2	4	4	3	0	0	0	1	1	4	0	0	0	1	1	4	0	0	0	0	0	3	5.8	5.8	4.2	91.161	825	825;843	0	8.0182	0	0	0	1.6	1.6	5.8	53619000	0	0	0	11992000	14726000	26900000	0
sp|P70704|AT8A1_MOUSE;sp|Q148W0|AT8B1_MOUSE	sp|P70704|AT8A1_MOUSE	53;1	53;1	52;1	sp|P70704|AT8A1_MOUSE Phospholipid-transporting ATPase IA OS=Mus musculus OX=10090 GN=Atp8a1 PE=1 SV=2	2	53	53	52	3	0	3	45	41	47	3	0	3	45	41	47	2	0	3	44	40	46	48.5	48.5	47.5	131.41	1164	1164;1251	0	323.31	2.9	0	3.3	42.4	41.9	39.7	27491000000	2356700	0	3873000	7125300000	10885000000	9474000000	2240500
sp|P51791|CLCN3_MOUSE	sp|P51791|CLCN3_MOUSE	16	16	12	sp|P51791|CLCN3_MOUSE H(+)/Cl(-) exchange transporter 3 OS=Mus musculus OX=10090 GN=Clcn3 PE=1 SV=2	1	16	16	12	0	0	0	13	9	12	0	0	0	13	9	12	0	0	0	10	7	9	24.7	24.7	19.8	90.868	818	818	0	100.47	0	0	0	19.8	13.6	18.6	1568000000	0	0	0	630840000	341900000	595280000	0
sp|P32037|GTR3_MOUSE	sp|P32037|GTR3_MOUSE	1	1	1	sp|P32037|GTR3_MOUSE Solute carrier family 2, facilitated glucose transporter member 3 OS=Mus musculus OX=10090 GN=Slc2a3 PE=1 SV=1	1	1	1	1	0	0	0	1	1	1	0	0	0	1	1	1	0	0	0	1	1	1	1.8	1.8	1.8	53.478	493	493	0.0036962	2.6994	0	0	0	1.8	1.8	1.8	31934000	0	0	0	5549900	9816500	16567000	0
sp|Q9D387|LAMP5_MOUSE	sp|Q9D387|LAMP5_MOUSE	5	5	5	sp|Q9D387|LAMP5_MOUSE Lysosome-associated membrane glycoprotein 5 OS=Mus musculus OX=10090 GN=Lamp5 PE=1 SV=2	1	5	5	5	0	0	0	4	3	4	0	0	0	4	3	4	0	0	0	4	3	4	21.4	21.4	21.4	31.721	280	280	0	159.78	0	0	0	20	10.7	12.1	1703100000	0	0	0	327730000	535960000	839370000	0
sp|Q8BRU6|VMAT2_MOUSE	sp|Q8BRU6|VMAT2_MOUSE	2	2	2	sp|Q8BRU6|VMAT2_MOUSE Synaptic vesicular amine transporter OS=Mus musculus OX=10090 GN=Slc18a2 PE=1 SV=1	1	2	2	2	0	0	0	2	2	2	0	0	0	2	2	2	0	0	0	2	2	2	5	5	5	55.753	517	517	0	297.84	0	0	0	5	5	5	598320000	0	0	0	108480000	228840000	261010000	0
sp|Q9DBX3|SUSD2_MOUSE	sp|Q9DBX3|SUSD2_MOUSE	5	5	5	sp|Q9DBX3|SUSD2_MOUSE Sushi domain-containing protein 2 OS=Mus musculus OX=10090 GN=Susd2 PE=1 SV=1	1	5	5	5	0	0	0	5	2	2	0	0	0	5	2	2	0	0	0	5	2	2	7.4	7.4	7.4	90.641	820	820	0	15.596	0	0	0	7.4	2.4	2.4	147990000	0	0	0	55458000	68826000	23709000	0
sp|P57746|VATD_MOUSE	sp|P57746|VATD_MOUSE	24	24	24	sp|P57746|VATD_MOUSE V-type proton ATPase subunit D OS=Mus musculus OX=10090 GN=Atp6v1d PE=1 SV=1	1	24	24	24	2	2	4	21	17	21	2	2	4	21	17	21	2	2	4	21	17	21	74.5	74.5	74.5	28.369	247	247	0	323.31	10.9	10.9	22.7	68.4	64.8	70.9	100340000000	29185000	7352100	35124000	32307000000	27452000000	40505000000	34558000
sp|P01831|THY1_MOUSE	sp|P01831|THY1_MOUSE	6	6	6	sp|P01831|THY1_MOUSE Thy-1 membrane glycoprotein OS=Mus musculus OX=10090 GN=Thy1 PE=1 SV=1	1	6	6	6	2	1	2	6	6	6	2	1	2	6	6	6	2	1	2	6	6	6	33.3	33.3	33.3	18.08	162	162	0	323.31	17.9	8.6	14.8	33.3	33.3	33.3	22239000000	11024000	3544400	19324000	5897300000	7523000000	8784700000	12985000
sp|P62746|RHOB_MOUSE	sp|P62746|RHOB_MOUSE	10	8	8	sp|P62746|RHOB_MOUSE Rho-related GTP-binding protein RhoB OS=Mus musculus OX=10090 GN=Rhob PE=1 SV=1	1	10	8	8	2	1	2	8	6	7	0	0	0	6	4	5	0	0	0	6	4	5	43.9	30.6	30.6	22.123	196	196	0	25.988	13.3	8.7	13.3	37.2	31.1	33.2	751980000	0	0	0	145810000	233290000	372870000	0
sp|P06728|APOA4_MOUSE	sp|P06728|APOA4_MOUSE	24	24	24	sp|P06728|APOA4_MOUSE Apolipoprotein A-IV OS=Mus musculus OX=10090 GN=Apoa4 PE=1 SV=3	1	24	24	24	3	2	2	14	20	22	3	2	2	14	20	22	3	2	2	14	20	22	74.9	74.9	74.9	45.029	395	395	0	323.31	9.6	5.6	6.1	49.9	68.4	71.9	3225700000	8734800	2469600	2542400	415360000	1342400000	1454200000	4661500
sp|P04925|PRIO_MOUSE	sp|P04925|PRIO_MOUSE	12	12	12	sp|P04925|PRIO_MOUSE Major prion protein OS=Mus musculus OX=10090 GN=Prnp PE=1 SV=2	1	12	12	12	2	0	1	8	9	9	2	0	1	8	9	9	2	0	1	8	9	9	42.9	42.9	42.9	27.977	254	254	0	103.44	9.1	0	4.3	26.4	39.8	37.8	1020700000	3558200	0	3126200	218820000	376310000	418840000	3578400
sp|P39655|LOX12_MOUSE	sp|P39655|LOX12_MOUSE	13	13	13	sp|P39655|LOX12_MOUSE Arachidonate 12-lipoxygenase, 12S-type OS=Mus musculus OX=10090 GN=Alox12 PE=1 SV=4	1	13	13	13	0	0	0	4	10	10	0	0	0	4	10	10	0	0	0	4	10	10	27.3	27.3	27.3	75.389	663	663	0	50.519	0	0	0	7.5	19.3	22.2	353600000	0	0	0	51020000	181000000	121570000	0
sp|Q8CBH5|MFSD6_MOUSE	sp|Q8CBH5|MFSD6_MOUSE	10	10	10	sp|Q8CBH5|MFSD6_MOUSE Major facilitator superfamily domain-containing protein 6 OS=Mus musculus OX=10090 GN=Mfsd6 PE=1 SV=1	1	10	10	10	0	0	0	7	6	10	0	0	0	7	6	10	0	0	0	7	6	10	17.3	17.3	17.3	86.075	775	775	0	323.31	0	0	0	12.6	11.1	17.3	2803800000	0	0	0	1176600000	589320000	1037900000	0
sp|Q8BLE7|VGLU2_MOUSE	sp|Q8BLE7|VGLU2_MOUSE	31	31	27	sp|Q8BLE7|VGLU2_MOUSE Vesicular glutamate transporter 2 OS=Mus musculus OX=10090 GN=Slc17a6 PE=1 SV=1	1	31	31	27	0	0	1	29	28	29	0	0	1	29	28	29	0	0	0	25	24	25	53.1	53.1	46.7	64.56	582	582	0	323.31	0	0	1.7	52.9	48.1	52.4	56966000000	0	0	1098000	15509000000	20052000000	21405000000	0
sp|B2RSH2|GNAI1_MOUSE;sp|P20612|GNAT1_MOUSE;sp|Q3V3I2|GNAT3_MOUSE;sp|P50149|GNAT2_MOUSE	sp|B2RSH2|GNAI1_MOUSE	15;2;2;2	13;1;1;1	9;0;0;0	sp|B2RSH2|GNAI1_MOUSE Guanine nucleotide-binding protein G(i) subunit alpha-1 OS=Mus musculus OX=10090 GN=Gnai1 PE=1 SV=1	4	15	13	9	1	2	0	12	13	14	0	0	0	10	11	12	0	0	0	7	7	8	43.2	36.7	24.3	40.361	354	354;350;354;354	0	323.31	3.4	6.5	0	39.3	41.8	42.7	1248200000	0	0	0	183280000	387090000	677790000	0
sp|Q9JIW9|RALB_MOUSE	sp|Q9JIW9|RALB_MOUSE	10	4	4	sp|Q9JIW9|RALB_MOUSE Ras-related protein Ral-B OS=Mus musculus OX=10090 GN=Ralb PE=1 SV=1	1	10	4	4	1	0	0	10	9	9	0	0	0	4	4	3	0	0	0	4	4	3	51	15.5	15.5	23.349	206	206	0	28.356	5.8	0	0	51	48.5	50	263860000	0	0	0	94276000	121850000	47739000	0
sp|P33622|APOC3_MOUSE	sp|P33622|APOC3_MOUSE	3	3	3	sp|P33622|APOC3_MOUSE Apolipoprotein C-III OS=Mus musculus OX=10090 GN=Apoc3 PE=1 SV=2	1	3	3	3	0	0	0	3	2	2	0	0	0	3	2	2	0	0	0	3	2	2	50.5	50.5	50.5	10.982	99	99	0	170.43	0	0	0	50.5	42.4	42.4	324140000	0	0	0	140360000	99757000	84022000	0
sp|Q80Z24|NEGR1_MOUSE	sp|Q80Z24|NEGR1_MOUSE	14	14	14	sp|Q80Z24|NEGR1_MOUSE Neuronal growth regulator 1 OS=Mus musculus OX=10090 GN=Negr1 PE=1 SV=1	1	14	14	14	0	0	0	10	9	13	0	0	0	10	9	13	0	0	0	10	9	13	47.7	47.7	47.7	37.9	348	348	0	323.31	0	0	0	39.7	32.5	47.7	5009600000	0	0	0	1572300000	1618100000	1819200000	0
sp|Q9QYF9|NDRG3_MOUSE	sp|Q9QYF9|NDRG3_MOUSE	12	12	12	sp|Q9QYF9|NDRG3_MOUSE Protein NDRG3 OS=Mus musculus OX=10090 GN=Ndrg3 PE=1 SV=1	1	12	12	12	1	0	0	7	9	11	1	0	0	7	9	11	1	0	0	7	9	11	42.4	42.4	42.4	41.555	375	375	0	274.71	2.7	0	0	24.3	35.7	41.9	1759800000	4754600	0	0	239290000	543930000	971840000	4993700
sp|O35609|SCAM3_MOUSE	sp|O35609|SCAM3_MOUSE	12	12	12	sp|O35609|SCAM3_MOUSE Secretory carrier-associated membrane protein 3 OS=Mus musculus OX=10090 GN=Scamp3 PE=1 SV=3	1	12	12	12	1	0	0	11	10	11	1	0	0	11	10	11	1	0	0	11	10	11	44.4	44.4	44.4	38.458	349	349	0	323.31	4.6	0	0	42.1	40.1	42.4	18813000000	1199700	0	0	3626400000	7176500000	8009300000	1939300
sp|Q99KW9|TIP_MOUSE	sp|Q99KW9|TIP_MOUSE	11	11	11	sp|Q99KW9|TIP_MOUSE T-cell immunomodulatory protein OS=Mus musculus OX=10090 GN=Itfg1 PE=1 SV=2	1	11	11	11	0	0	0	6	9	10	0	0	0	6	9	10	0	0	0	6	9	10	24.1	24.1	24.1	67.464	610	610	0	65.131	0	0	0	18.7	18	19.8	1195000000	0	0	0	211890000	461800000	521290000	0
sp|P55258|RAB8A_MOUSE;sp|Q9DD03|RAB13_MOUSE	sp|P55258|RAB8A_MOUSE	8;2	3;0	3;0	sp|P55258|RAB8A_MOUSE Ras-related protein Rab-8A OS=Mus musculus OX=10090 GN=Rab8a PE=1 SV=2	2	8	3	3	4	0	3	6	7	6	2	0	1	3	3	2	2	0	1	3	3	2	40.6	16.4	16.4	23.668	207	207;202	0	85.641	21.7	0	15.9	30	36.2	27.5	882420000	33180000	0	29508000	122390000	382260000	315090000	6769000
sp|P48318|DCE1_MOUSE	sp|P48318|DCE1_MOUSE	17	16	16	sp|P48318|DCE1_MOUSE Glutamate decarboxylase 1 OS=Mus musculus OX=10090 GN=Gad1 PE=1 SV=2	1	17	16	16	2	2	7	15	13	13	2	2	6	14	12	12	2	2	6	14	12	12	40.3	38.6	38.6	66.648	593	593	0	323.31	4.2	4.9	15	35.6	29.7	30.4	1576100000	22512000	4521400	46004000	535810000	476370000	490870000	11155000
sp|Q99JP7|GGT7_MOUSE	sp|Q99JP7|GGT7_MOUSE	17	17	17	sp|Q99JP7|GGT7_MOUSE Glutathione hydrolase 7 OS=Mus musculus OX=10090 GN=Ggt7 PE=1 SV=2	1	17	17	17	0	0	0	11	16	14	0	0	0	11	16	14	0	0	0	11	16	14	31.3	31.3	31.3	70.251	662	662	0	323.31	0	0	0	19.9	30.2	27.3	1220600000	0	0	0	324800000	436550000	459230000	0
sp|Q8HW98|IGLO5_MOUSE	sp|Q8HW98|IGLO5_MOUSE	5	5	5	sp|Q8HW98|IGLO5_MOUSE IgLON family member 5 OS=Mus musculus OX=10090 GN=Iglon5 PE=2 SV=2	1	5	5	5	0	0	0	4	2	2	0	0	0	4	2	2	0	0	0	4	2	2	19.3	19.3	19.3	36.766	336	336	0	19.266	0	0	0	16.1	6.2	5.7	208550000	0	0	0	44913000	112310000	51324000	0
sp|Q3THK3|T2FA_MOUSE	sp|Q3THK3|T2FA_MOUSE	5	5	5	sp|Q3THK3|T2FA_MOUSE General transcription factor IIF subunit 1 OS=Mus musculus OX=10090 GN=Gtf2f1 PE=1 SV=2	1	5	5	5	0	0	2	3	1	3	0	0	2	3	1	3	0	0	2	3	1	3	12.4	12.4	12.4	57.241	508	508	0	133.01	0	0	5.5	8.1	3.1	7.5	190450000	0	0	1300300	47810000	57411000	83924000	0
sp|Q8CJ61|CKLF4_MOUSE	sp|Q8CJ61|CKLF4_MOUSE	1	1	1	sp|Q8CJ61|CKLF4_MOUSE CKLF-like MARVEL transmembrane domain-containing protein 4 OS=Mus musculus OX=10090 GN=Cmtm4 PE=1 SV=1	1	1	1	1	0	0	0	1	1	1	0	0	0	1	1	1	0	0	0	1	1	1	4.3	4.3	4.3	22.921	208	208	0.0040228	2.6898	0	0	0	4.3	4.3	4.3	69658000	0	0	0	12383000	20676000	36600000	0
sp|Q8BGF8|S35D3_MOUSE	sp|Q8BGF8|S35D3_MOUSE	3	3	3	sp|Q8BGF8|S35D3_MOUSE Solute carrier family 35 member D3 OS=Mus musculus OX=10090 GN=Slc35d3 PE=2 SV=1	1	3	3	3	0	0	0	1	1	3	0	0	0	1	1	3	0	0	0	1	1	3	8.8	8.8	8.8	44.917	422	422	0	4.8049	0	0	0	2.6	2.6	8.8	27797000	0	0	0	3377800	11692000	12727000	0
sp|Q8BL86|MBLC2_MOUSE	sp|Q8BL86|MBLC2_MOUSE	16	16	16	sp|Q8BL86|MBLC2_MOUSE Metallo-beta-lactamase domain-containing protein 2 OS=Mus musculus OX=10090 GN=Mblac2 PE=1 SV=2	1	16	16	16	0	0	0	14	13	14	0	0	0	14	13	14	0	0	0	14	13	14	68.1	68.1	68.1	31.205	279	279	0	323.31	0	0	0	63.1	59.5	56.3	5375800000	0	0	0	1821400000	1552400000	2002000000	0
sp|P53994|RAB2A_MOUSE	sp|P53994|RAB2A_MOUSE	21	21	12	sp|P53994|RAB2A_MOUSE Ras-related protein Rab-2A OS=Mus musculus OX=10090 GN=Rab2a PE=1 SV=1	1	21	21	12	12	4	12	19	19	19	12	4	12	19	19	19	5	3	6	11	11	11	93.9	93.9	63.2	23.547	212	212	0	323.31	63.7	23.6	59.9	81.6	91.5	91	44900000000	627340000	30766000	455560000	10253000000	14787000000	18747000000	301370000
sp|Q9DBL7|COASY_MOUSE	sp|Q9DBL7|COASY_MOUSE	5	5	5	sp|Q9DBL7|COASY_MOUSE Bifunctional coenzyme A synthase OS=Mus musculus OX=10090 GN=Coasy PE=1 SV=2	1	5	5	5	1	0	1	1	3	1	1	0	1	1	3	1	1	0	1	1	3	1	13	13	13	62.022	563	563	0	9.254	2.1	0	2.8	2.1	8	2.1	1386000000	6201400	0	0	794870000	245740000	339180000	0
sp|Q9CVN6|CBY3_MOUSE	sp|Q9CVN6|CBY3_MOUSE	1	1	1	sp|Q9CVN6|CBY3_MOUSE Protein chibby homolog 3 OS=Mus musculus OX=10090 GN=Cby3 PE=2 SV=2	1	1	1	1	0	0	0	1	1	1	0	0	0	1	1	1	0	0	0	1	1	1	6.8	6.8	6.8	26.69	235	235	0.005814	2.3561	0	0	0	6.8	6.8	6.8	127300000	0	0	0	43711000	43076000	40512000	0
sp|Q8BZ60|STON2_MOUSE	sp|Q8BZ60|STON2_MOUSE	7	7	7	sp|Q8BZ60|STON2_MOUSE Stonin-2 OS=Mus musculus OX=10090 GN=Ston2 PE=1 SV=1	1	7	7	7	0	0	0	4	2	4	0	0	0	4	2	4	0	0	0	4	2	4	9.4	9.4	9.4	99.61	895	895	0	11.313	0	0	0	5.4	2.2	5.3	85268000	0	0	0	27971000	30013000	27285000	0
sp|Q9Z0L0|TPBG_MOUSE	sp|Q9Z0L0|TPBG_MOUSE	7	7	7	sp|Q9Z0L0|TPBG_MOUSE Trophoblast glycoprotein OS=Mus musculus OX=10090 GN=Tpbg PE=1 SV=3	1	7	7	7	0	0	0	5	5	6	0	0	0	5	5	6	0	0	0	5	5	6	20.2	20.2	20.2	46.451	426	426	0	193.28	0	0	0	14.6	16	17.8	431350000	0	0	0	159600000	111910000	159830000	0
sp|Q62159|RHOC_MOUSE	sp|Q62159|RHOC_MOUSE	9	1	1	sp|Q62159|RHOC_MOUSE Rho-related GTP-binding protein RhoC OS=Mus musculus OX=10090 GN=Rhoc PE=1 SV=2	1	9	1	1	5	2	7	8	8	9	0	0	1	1	1	1	0	0	1	1	1	1	38.3	6.2	6.2	22.006	193	193	0.0023956	2.8867	26.9	16.6	37.3	37.8	37.8	38.3	185340000	0	0	6667200	54529000	53562000	70582000	0
sp|Q9Z1G3|VATC1_MOUSE	sp|Q9Z1G3|VATC1_MOUSE	48	48	46	sp|Q9Z1G3|VATC1_MOUSE V-type proton ATPase subunit C 1 OS=Mus musculus OX=10090 GN=Atp6v1c1 PE=1 SV=4	1	48	48	46	14	1	5	42	37	42	14	1	5	42	37	42	14	1	5	40	35	40	90.3	90.3	84.6	43.887	382	382	0	323.31	30.9	3.1	16.5	86.4	79.3	86.1	160700000000	102400000	6699000	54943000	36829000000	42748000000	80963000000	49408000
sp|P61021|RAB5B_MOUSE	sp|P61021|RAB5B_MOUSE	8	5	5	sp|P61021|RAB5B_MOUSE Ras-related protein Rab-5B OS=Mus musculus OX=10090 GN=Rab5b PE=1 SV=1	1	8	5	5	8	0	7	8	7	7	5	0	4	5	4	4	5	0	4	5	4	4	53.5	38.6	38.6	23.707	215	215	0	323.31	53.5	0	42.3	53.5	42.3	42.3	4393700000	235710000	0	176930000	1622600000	1311500000	1046900000	39757000
sp|P21279|GNAQ_MOUSE;sp|P30677|GNA14_MOUSE;sp|P27600|GNA12_MOUSE	sp|P21279|GNAQ_MOUSE	15;3;1	14;2;0	10;1;0	sp|P21279|GNAQ_MOUSE Guanine nucleotide-binding protein G(q) subunit alpha OS=Mus musculus OX=10090 GN=Gnaq PE=1 SV=4	3	15	14	10	0	0	0	11	10	12	0	0	0	10	10	12	0	0	0	9	8	8	51	48.7	37	42.158	359	359;355;379	0	323.31	0	0	0	38.7	35.1	41.2	1400600000	0	0	0	250040000	370590000	779970000	0
sp|P46096|SYT1_MOUSE	sp|P46096|SYT1_MOUSE	45	45	35	sp|P46096|SYT1_MOUSE Synaptotagmin-1 OS=Mus musculus OX=10090 GN=Syt1 PE=1 SV=1	1	45	45	35	9	2	8	42	37	38	9	2	8	42	37	38	6	2	6	32	28	28	62	62	54.9	47.417	421	421	0	323.31	24.7	5.7	18.1	62	54.4	54.4	401860000000	159350000	10742000	135820000	130980000000	122660000000	147910000000	32786000
sp|P55821|STMN2_MOUSE;sp|P54227|STMN1_MOUSE	sp|P55821|STMN2_MOUSE	4;1	4;1	4;1	sp|P55821|STMN2_MOUSE Stathmin-2 OS=Mus musculus OX=10090 GN=Stmn2 PE=1 SV=1	2	4	4	4	0	0	0	2	2	3	0	0	0	2	2	3	0	0	0	2	2	3	27.9	27.9	27.9	20.828	179	179;149	0	7.8582	0	0	0	11.2	10.6	22.9	93521000	0	0	0	18060000	22196000	53265000	0
sp|Q9Z266|SNAPN_MOUSE	sp|Q9Z266|SNAPN_MOUSE	3	3	3	sp|Q9Z266|SNAPN_MOUSE SNARE-associated protein Snapin OS=Mus musculus OX=10090 GN=Snapin PE=1 SV=1	1	3	3	3	0	0	1	2	2	3	0	0	1	2	2	3	0	0	1	2	2	3	33.1	33.1	33.1	14.904	136	136	0	135.86	0	0	15.4	25.7	25.7	33.1	51205000	0	0	0	13546000	11925000	25734000	0
sp|Q99MR3|S12A9_MOUSE	sp|Q99MR3|S12A9_MOUSE	13	13	13	sp|Q99MR3|S12A9_MOUSE Solute carrier family 12 member 9 OS=Mus musculus OX=10090 GN=Slc12a9 PE=1 SV=2	1	13	13	13	0	0	0	8	7	13	0	0	0	8	7	13	0	0	0	8	7	13	23.4	23.4	23.4	96.329	914	914	0	67.785	0	0	0	15.4	10.3	23.4	815000000	0	0	0	225030000	168660000	421310000	0
sp|Q9QUI0|RHOA_MOUSE	sp|Q9QUI0|RHOA_MOUSE	12	12	4	sp|Q9QUI0|RHOA_MOUSE Transforming protein RhoA OS=Mus musculus OX=10090 GN=Rhoa PE=1 SV=1	1	12	12	4	6	2	7	10	10	11	6	2	7	10	10	11	1	0	1	3	3	3	60.6	60.6	32.6	21.782	193	193	0	323.31	33.2	16.6	37.3	47.7	52.3	52.8	4397700000	57589000	1811000	83440000	795540000	1385000000	2074300000	49062000
sp|Q64237|DOPO_MOUSE	sp|Q64237|DOPO_MOUSE	7	7	7	sp|Q64237|DOPO_MOUSE Dopamine beta-hydroxylase OS=Mus musculus OX=10090 GN=Dbh PE=1 SV=2	1	7	7	7	0	0	0	5	2	5	0	0	0	5	2	5	0	0	0	5	2	5	11.6	11.6	11.6	70.313	622	622	0	11.035	0	0	0	8.5	4.2	8.7	130770000	0	0	0	41448000	26775000	62551000	0
sp|Q9R1Q9|VAS1_MOUSE	sp|Q9R1Q9|VAS1_MOUSE	6	6	6	sp|Q9R1Q9|VAS1_MOUSE V-type proton ATPase subunit S1 OS=Mus musculus OX=10090 GN=Atp6ap1 PE=1 SV=1	1	6	6	6	0	0	0	5	5	6	0	0	0	5	5	6	0	0	0	5	5	6	10.2	10.2	10.2	51.007	463	463	0	89.423	0	0	0	7.1	7.1	10.2	23975000000	0	0	0	9262200000	7625800000	7086800000	0
sp|O70228|ATP9A_MOUSE	sp|O70228|ATP9A_MOUSE	17	17	13	sp|O70228|ATP9A_MOUSE Probable phospholipid-transporting ATPase IIA OS=Mus musculus OX=10090 GN=Atp9a PE=1 SV=3	1	17	17	13	0	0	0	8	7	14	0	0	0	8	7	14	0	0	0	5	6	10	17.9	17.9	14.9	118.61	1047	1047	0	46.131	0	0	0	7.4	8.1	14.8	280750000	0	0	0	56381000	103840000	120530000	0
sp|P35282|RAB21_MOUSE	sp|P35282|RAB21_MOUSE	13	13	13	sp|P35282|RAB21_MOUSE Ras-related protein Rab-21 OS=Mus musculus OX=10090 GN=Rab21 PE=1 SV=4	1	13	13	13	6	0	6	13	11	12	6	0	6	13	11	12	6	0	6	13	11	12	57.2	57.2	57.2	24.106	222	222	0	323.31	27.9	0	34.2	57.2	46.4	55	5084000000	105850000	0	128790000	1475700000	1873200000	1500400000	24765000
sp|Q99K70|RRAGC_MOUSE;sp|Q7TT45|RRAGD_MOUSE	sp|Q99K70|RRAGC_MOUSE;sp|Q7TT45|RRAGD_MOUSE	4;3	4;3	4;3	sp|Q99K70|RRAGC_MOUSE Ras-related GTP-binding protein C OS=Mus musculus OX=10090 GN=Rragc PE=1 SV=1;sp|Q7TT45|RRAGD_MOUSE Ras-related GTP-binding protein D OS=Mus musculus OX=10090 GN=Rragd PE=1 SV=2	2	4	4	4	0	0	0	1	4	1	0	0	0	1	4	1	0	0	0	1	4	1	12.1	12.1	12.1	44.12	398	398;449	0	8.7176	0	0	0	5.8	12.1	2.3	75709000	0	0	0	7976700	52714000	15018000	0
sp|P70213|FV1_MOUSE	sp|P70213|FV1_MOUSE	8	8	8	sp|P70213|FV1_MOUSE Friend virus susceptibility protein 1 OS=Mus musculus OX=10090 GN=Fv1 PE=4 SV=1	1	8	8	8	0	0	0	6	4	4	0	0	0	6	4	4	0	0	0	6	4	4	23.5	23.5	23.5	51.996	459	459	0	24.741	0	0	0	18.5	9.8	10.2	151000000	0	0	0	54298000	48680000	48027000	0
sp|P12367|KAP2_MOUSE	sp|P12367|KAP2_MOUSE	11	8	8	sp|P12367|KAP2_MOUSE cAMP-dependent protein kinase type II-alpha regulatory subunit OS=Mus musculus OX=10090 GN=Prkar2a PE=1 SV=2	1	11	8	8	4	0	2	10	7	7	2	0	0	7	5	4	2	0	0	7	5	4	39.4	29.2	29.2	45.389	401	401	0	323.31	13.7	0	6.7	35.9	23.4	24.9	856730000	7549900	0	0	412020000	319520000	117630000	5480900
sp|Q9R0K7|AT2B2_MOUSE	sp|Q9R0K7|AT2B2_MOUSE	28	28	22	sp|Q9R0K7|AT2B2_MOUSE Plasma membrane calcium-transporting ATPase 2 OS=Mus musculus OX=10090 GN=Atp2b2 PE=1 SV=2	1	28	28	22	1	0	1	22	15	19	1	0	1	22	15	19	0	0	0	17	10	15	25.5	25.5	20.5	132.59	1198	1198	0	119.25	1.4	0	0.7	20	15.8	18.7	942030000	1863300	0	1770800	261370000	323130000	353900000	350400
sp|Q9JK48|SHLB1_MOUSE	sp|Q9JK48|SHLB1_MOUSE	22;1	21;1	21;1	sp|Q9JK48|SHLB1_MOUSE Endophilin-B1 OS=Mus musculus OX=10090 GN=Sh3glb1 PE=1 SV=1	2	22	21	21	2	0	2	20	18	22	2	0	2	19	17	21	2	0	2	19	17	21	49.3	49.3	49.3	40.855	365	365;1607	0	323.31	8.8	0	7.7	47.1	45.5	49.3	28186000000	5109000	0	0	6733100000	8771700000	12676000000	4888100
sp|P62835|RAP1A_MOUSE	sp|P62835|RAP1A_MOUSE	10	10	3	sp|P62835|RAP1A_MOUSE Ras-related protein Rap-1A OS=Mus musculus OX=10090 GN=Rap1a PE=1 SV=1	1	10	10	3	3	3	3	8	9	9	3	3	3	8	9	9	1	0	1	3	2	2	63.6	63.6	29.3	20.987	184	184	0	250.85	19.6	13.6	20.7	48.9	49.5	49.5	4105400000	37476000	32624000	39431000	648920000	1605700000	1741300000	35427000
sp|O35633|VIAAT_MOUSE	sp|O35633|VIAAT_MOUSE	29	29	29	sp|O35633|VIAAT_MOUSE Vesicular inhibitory amino acid transporter OS=Mus musculus OX=10090 GN=Slc32a1 PE=1 SV=3	1	29	29	29	0	0	1	27	22	25	0	0	1	27	22	25	0	0	1	27	22	25	52	52	52	57.38	525	525	0	323.31	0	0	2.7	51.2	46.9	47.6	74852000000	0	0	0	23459000000	23910000000	27483000000	0
sp|Q80VP0|TCPR1_MOUSE	sp|Q80VP0|TCPR1_MOUSE	39	39	39	sp|Q80VP0|TCPR1_MOUSE Tectonin beta-propeller repeat-containing protein 1 OS=Mus musculus OX=10090 GN=Tecpr1 PE=1 SV=1	1	39	39	39	0	0	0	33	29	29	0	0	0	33	29	29	0	0	0	33	29	29	43.4	43.4	43.4	130.26	1166	1166	0	323.31	0	0	0	37	33.9	32.2	2559800000	0	0	0	792300000	1046300000	721170000	0
sp|P17047|LAMP2_MOUSE	sp|P17047|LAMP2_MOUSE	4	4	4	sp|P17047|LAMP2_MOUSE Lysosome-associated membrane glycoprotein 2 OS=Mus musculus OX=10090 GN=Lamp2 PE=1 SV=2	1	4	4	4	0	0	0	2	3	3	0	0	0	2	3	3	0	0	0	2	3	3	9.9	9.9	9.9	45.681	415	415	0	16.6	0	0	0	4.6	6.5	7.7	334760000	0	0	0	107150000	87868000	139740000	0
sp|Q9D3D0|TTPAL_MOUSE	sp|Q9D3D0|TTPAL_MOUSE	17	17	17	sp|Q9D3D0|TTPAL_MOUSE Alpha-tocopherol transfer protein-like OS=Mus musculus OX=10090 GN=Ttpal PE=1 SV=3	1	17	17	17	2	0	0	13	12	17	2	0	0	13	12	17	2	0	0	13	12	17	54.5	54.5	54.5	38.835	343	343	0	163.56	6.7	0	0	40.8	39.4	54.5	1898700000	4117100	0	0	338870000	370740000	1184900000	3625800
sp|Q99LP6|GRPE1_MOUSE	sp|Q99LP6|GRPE1_MOUSE	10	10	10	sp|Q99LP6|GRPE1_MOUSE GrpE protein homolog 1, mitochondrial OS=Mus musculus OX=10090 GN=Grpel1 PE=1 SV=1	1	10	10	10	0	0	0	8	4	8	0	0	0	8	4	8	0	0	0	8	4	8	49.8	49.8	49.8	24.307	217	217	0	63.563	0	0	0	42.4	22.1	41.9	677370000	0	0	0	285390000	158840000	233150000	0
sp|P62880|GBB2_MOUSE	sp|P62880|GBB2_MOUSE	18	12	9	sp|P62880|GBB2_MOUSE Guanine nucleotide-binding protein G(I)/G(S)/G(T) subunit beta-2 OS=Mus musculus OX=10090 GN=Gnb2 PE=1 SV=3	1	18	12	9	4	2	6	14	15	17	3	2	3	9	9	11	2	1	1	6	6	8	60.9	42.6	38.8	37.331	340	340	0	323.31	16.8	9.7	21.8	52.6	58.2	59.4	7522100000	29916000	21433000	63194000	1377000000	1875700000	4154800000	30198000
sp|Q8BHS6|ARMX3_MOUSE	sp|Q8BHS6|ARMX3_MOUSE	5	5	5	sp|Q8BHS6|ARMX3_MOUSE Armadillo repeat-containing X-linked protein 3 OS=Mus musculus OX=10090 GN=Armcx3 PE=1 SV=1	1	5	5	5	0	0	0	1	4	4	0	0	0	1	4	4	0	0	0	1	4	4	17.7	17.7	17.7	42.619	379	379	0	14.416	0	0	0	2.9	13.2	15	55334000	0	0	0	5271500	20818000	29245000	0
sp|Q63912|OMGP_MOUSE	sp|Q63912|OMGP_MOUSE	3	3	3	sp|Q63912|OMGP_MOUSE Oligodendrocyte-myelin glycoprotein OS=Mus musculus OX=10090 GN=Omg PE=1 SV=1	1	3	3	3	1	0	1	3	1	1	1	0	1	3	1	1	1	0	1	3	1	1	6.6	6.6	6.6	49.283	440	440	0	6.6648	4.1	0	2.3	6.6	2.5	2.5	47916000	6935400	0	0	10606000	13941000	16433000	0
sp|P60764|RAC3_MOUSE;sp|Q8R527|RHOQ_MOUSE;sp|Q9ER71|RHOJ_MOUSE	sp|P60764|RAC3_MOUSE	8;1;1	1;0;0	1;0;0	sp|P60764|RAC3_MOUSE Ras-related C3 botulinum toxin substrate 3 OS=Mus musculus OX=10090 GN=Rac3 PE=1 SV=1	3	8	1	1	6	1	4	7	7	6	0	0	0	1	1	1	0	0	0	1	1	1	40.6	7.3	7.3	21.379	192	192;205;214	0.0017194	2.9457	32.8	5.2	19.8	40.1	31.8	31.2	53728000	0	0	0	17778000	22238000	13711000	0
sp|P18872|GNAO_MOUSE	sp|P18872|GNAO_MOUSE	19	19	17	sp|P18872|GNAO_MOUSE Guanine nucleotide-binding protein G(o) subunit alpha OS=Mus musculus OX=10090 GN=Gnao1 PE=1 SV=3	1	19	19	17	5	2	2	14	16	17	5	2	2	14	16	17	4	0	2	12	14	15	58.2	58.2	51.7	40.084	354	354	0	323.31	20.9	6.5	7.3	42.9	52.8	47.2	15624000000	19935000	24210000	9902800	2621400000	4453900000	8494600000	15622000
sp|Q9Z123|SEM4F_MOUSE	sp|Q9Z123|SEM4F_MOUSE	9	9	9	sp|Q9Z123|SEM4F_MOUSE Semaphorin-4F OS=Mus musculus OX=10090 GN=Sema4f PE=1 SV=2	1	9	9	9	0	0	0	4	4	8	0	0	0	4	4	8	0	0	0	4	4	8	16	16	16	84.489	777	777	0	64.957	0	0	0	7.1	8.1	14.4	318490000	0	0	0	62839000	90619000	165030000	0
sp|Q8BFU8|VGLU3_MOUSE	sp|Q8BFU8|VGLU3_MOUSE	4	2	2	sp|Q8BFU8|VGLU3_MOUSE Vesicular glutamate transporter 3 OS=Mus musculus OX=10090 GN=Slc17a8 PE=2 SV=1	1	4	2	2	0	0	0	3	4	4	0	0	0	1	2	2	0	0	0	1	2	2	9.2	6.8	6.8	66.148	601	601	0	122.59	0	0	0	7.2	9.2	9.2	3398300000	0	0	0	1553400000	1262500000	582410000	0
sp|Q3UNH4|GRIN1_MOUSE	sp|Q3UNH4|GRIN1_MOUSE	5	5	5	sp|Q3UNH4|GRIN1_MOUSE G protein-regulated inducer of neurite outgrowth 1 OS=Mus musculus OX=10090 GN=Gprin1 PE=1 SV=2	1	5	5	5	0	0	0	3	4	2	0	0	0	3	4	2	0	0	0	3	4	2	6.7	6.7	6.7	95.495	932	932	0	9.4001	0	0	0	4.1	5.4	2.5	20704000	0	0	0	2553600	13854000	4296800	0
sp|Q8R191|SNG3_MOUSE	sp|Q8R191|SNG3_MOUSE	9	9	9	sp|Q8R191|SNG3_MOUSE Synaptogyrin-3 OS=Mus musculus OX=10090 GN=Syngr3 PE=1 SV=1	1	9	9	9	4	1	2	8	7	8	4	1	2	8	7	8	4	1	2	8	7	8	28.4	28.4	28.4	24.561	229	229	0	152.37	19.7	6.6	10	27.5	27.5	28.4	111400000000	73507000	0	34117000	29051000000	40715000000	41531000000	9391500
sp|Q8R3V5|SHLB2_MOUSE	sp|Q8R3V5|SHLB2_MOUSE	27	27	26	sp|Q8R3V5|SHLB2_MOUSE Endophilin-B2 OS=Mus musculus OX=10090 GN=Sh3glb2 PE=1 SV=2	1	27	27	26	7	1	6	27	25	26	7	1	6	27	25	26	7	1	6	26	24	25	59.5	59.5	59.5	44.503	400	400	0	323.31	17	3.2	17.5	59.5	57.2	58.8	129400000000	117090000	0	178240000	49122000000	39298000000	40689000000	18223000
sp|Q66GT5|PTPM1_MOUSE	sp|Q66GT5|PTPM1_MOUSE	7	7	7	sp|Q66GT5|PTPM1_MOUSE Phosphatidylglycerophosphatase and protein-tyrosine phosphatase 1 OS=Mus musculus OX=10090 GN=Ptpmt1 PE=1 SV=1	1	7	7	7	0	0	0	6	3	3	0	0	0	6	3	3	0	0	0	6	3	3	48.7	48.7	48.7	21.942	193	193	0	51.542	0	0	0	39.9	20.2	21.8	817780000	0	0	0	286970000	300180000	230620000	0
sp|Q8VHW2|CCG8_MOUSE	sp|Q8VHW2|CCG8_MOUSE	7	7	7	sp|Q8VHW2|CCG8_MOUSE Voltage-dependent calcium channel gamma-8 subunit OS=Mus musculus OX=10090 GN=Cacng8 PE=1 SV=1	1	7	7	7	0	0	0	7	3	5	0	0	0	7	3	5	0	0	0	7	3	5	21.5	21.5	21.5	43.452	423	423	0	66.286	0	0	0	21.5	10.9	18.7	234880000	0	0	0	63997000	44524000	126360000	0
sp|Q8BJI1|S6A17_MOUSE;sp|Q8BG16|S6A15_MOUSE	sp|Q8BJI1|S6A17_MOUSE	28;1	28;1	28;1	sp|Q8BJI1|S6A17_MOUSE Sodium-dependent neutral amino acid transporter SLC6A17 OS=Mus musculus OX=10090 GN=Slc6a17 PE=1 SV=1	2	28	28	28	1	0	1	26	22	23	1	0	1	26	22	23	1	0	1	26	22	23	42	42	42	81.07	727	727;729	0	323.31	1.8	0	1.7	41.7	34.9	37.1	25234000000	1972000	0	3175000	9187700000	6879000000	9162200000	347490
sp|Q8K400|STXB5_MOUSE	sp|Q8K400|STXB5_MOUSE	21	20	20	sp|Q8K400|STXB5_MOUSE Syntaxin-binding protein 5 OS=Mus musculus OX=10090 GN=Stxbp5 PE=1 SV=3	1	21	20	20	1	0	6	13	16	11	1	0	6	13	15	11	1	0	6	13	15	11	26.1	25.4	25.4	127.65	1152	1152	0	70.434	1	0	7.8	15.3	20.9	13.3	1023600000	4941100	0	54876000	277070000	428370000	258320000	2425600
sp|Q8BGK9|CC018_MOUSE	sp|Q8BGK9|CC018_MOUSE	2	2	2	sp|Q8BGK9|CC018_MOUSE Uncharacterized protein C3orf18 homolog OS=Mus musculus OX=10090 PE=2 SV=1	1	2	2	2	0	0	0	1	2	2	0	0	0	1	2	2	0	0	0	1	2	2	15.9	15.9	15.9	17.721	164	164	0	6.8641	0	0	0	7.3	15.9	15.9	558930000	0	0	0	85973000	171270000	301690000	0
sp|Q9QXV8|SPY2_MOUSE	sp|Q9QXV8|SPY2_MOUSE	4	3	3	sp|Q9QXV8|SPY2_MOUSE Protein sprouty homolog 2 OS=Mus musculus OX=10090 GN=Spry2 PE=2 SV=1	1	4	3	3	0	0	0	1	2	4	0	0	0	1	2	3	0	0	0	1	2	3	17.5	15.2	15.2	34.623	315	315	0	9.9961	0	0	0	5.7	10.2	17.5	79181000	0	0	0	6222600	16861000	56097000	0
sp|Q8BYP3|RHOF_MOUSE	sp|Q8BYP3|RHOF_MOUSE	3	3	3	sp|Q8BYP3|RHOF_MOUSE Rho-related GTP-binding protein RhoF OS=Mus musculus OX=10090 GN=Rhof PE=1 SV=1	1	3	3	3	0	0	0	2	2	3	0	0	0	2	2	3	0	0	0	2	2	3	17.5	17.5	17.5	23.577	211	211	0	6.8808	0	0	0	12.8	12.8	17.5	35481000	0	0	0	8913700	5197000	21371000	0
sp|P51863|VA0D1_MOUSE	sp|P51863|VA0D1_MOUSE	32	32	32	sp|P51863|VA0D1_MOUSE V-type proton ATPase subunit d 1 OS=Mus musculus OX=10090 GN=Atp6v0d1 PE=1 SV=2	1	32	32	32	6	3	4	27	28	30	6	3	4	27	28	30	6	3	4	27	28	30	65.5	65.5	65.5	40.301	351	351	0	323.31	16	10.3	14.2	58.4	63.8	64.7	309200000000	58621000	51843000	63443000	40507000000	117750000000	150770000000	42945000
sp|Q6NXM3|TM130_MOUSE	sp|Q6NXM3|TM130_MOUSE	4	4	4	sp|Q6NXM3|TM130_MOUSE Transmembrane protein 130 OS=Mus musculus OX=10090 GN=Tmem130 PE=2 SV=1	1	4	4	4	0	0	0	3	2	4	0	0	0	3	2	4	0	0	0	3	2	4	11.7	11.7	11.7	46.627	419	419	0	7.9113	0	0	0	8.6	6.4	11.7	84745000	0	0	0	30136000	20822000	33786000	0
sp|Q9D1G1|RAB1B_MOUSE	sp|Q9D1G1|RAB1B_MOUSE	17	17	11	sp|Q9D1G1|RAB1B_MOUSE Ras-related protein Rab-1B OS=Mus musculus OX=10090 GN=Rab1b PE=1 SV=1	1	17	17	11	10	1	10	16	15	15	10	1	10	16	15	15	5	1	6	10	10	9	88.6	88.6	57.2	22.187	201	201	0	323.31	59.7	5	50.7	82.6	84.1	81.6	27527000000	1219400000	1343900	1131700000	5662000000	9078000000	10434000000	470190000
sp|Q68FE2|ATG9A_MOUSE	sp|Q68FE2|ATG9A_MOUSE	12	12	12	sp|Q68FE2|ATG9A_MOUSE Autophagy-related protein 9A OS=Mus musculus OX=10090 GN=Atg9a PE=1 SV=1	1	12	12	12	1	0	0	6	9	10	1	0	0	6	9	10	1	0	0	6	9	10	23.2	23.2	23.2	63.137	551	551	0	44.252	2.5	0	0	14.2	17.1	17.6	450520000	5552700	0	0	98736000	160410000	185820000	0
sp|P80560|PTPR2_MOUSE	sp|P80560|PTPR2_MOUSE	27	27	26	sp|P80560|PTPR2_MOUSE Receptor-type tyrosine-protein phosphatase N2 OS=Mus musculus OX=10090 GN=Ptprn2 PE=1 SV=2	1	27	27	26	0	0	0	16	16	21	0	0	0	16	16	21	0	0	0	16	15	20	32.8	32.8	31.4	111.5	1001	1001	0	323.31	0	0	0	20	20.7	28.2	3435700000	0	0	0	1165900000	837750000	1432000000	0
sp|Q8BHH9|T179A_MOUSE	sp|Q8BHH9|T179A_MOUSE	3	3	3	sp|Q8BHH9|T179A_MOUSE Transmembrane protein 179 OS=Mus musculus OX=10090 GN=Tmem179 PE=2 SV=1	1	3	3	3	0	0	0	3	3	3	0	0	0	3	3	3	0	0	0	3	3	3	15	15	15	26.462	233	233	0	83.84	0	0	0	15	15	15	337390000	0	0	0	83859000	59681000	193850000	0
sp|P97797|SHPS1_MOUSE	sp|P97797|SHPS1_MOUSE	9	9	9	sp|P97797|SHPS1_MOUSE Tyrosine-protein phosphatase non-receptor type substrate 1 OS=Mus musculus OX=10090 GN=Sirpa PE=1 SV=2	1	9	9	9	0	0	1	7	6	8	0	0	1	7	6	8	0	0	1	7	6	8	23.6	23.6	23.6	56.413	513	513	0	67.275	0	0	2.5	20.5	16.6	23	1583600000	0	0	1566100	436770000	415860000	729450000	0
sp|Q9ERI6|RDH14_MOUSE	sp|Q9ERI6|RDH14_MOUSE	17	17	17	sp|Q9ERI6|RDH14_MOUSE Retinol dehydrogenase 14 OS=Mus musculus OX=10090 GN=Rdh14 PE=1 SV=1	1	17	17	17	4	1	2	15	14	17	4	1	2	15	14	17	4	1	2	15	14	17	56.9	56.9	56.9	36.365	334	334	0	323.31	12.3	2.4	6	51.5	53.9	56.9	4789200000	15562000	0	28854000	1317600000	1334900000	2092200000	14885000
sp|Q61418|CLCN4_MOUSE	sp|Q61418|CLCN4_MOUSE	14	10	9	sp|Q61418|CLCN4_MOUSE H(+)/Cl(-) exchange transporter 4 OS=Mus musculus OX=10090 GN=Clcn4 PE=2 SV=2	1	14	10	9	0	0	0	8	6	10	0	0	0	5	4	7	0	0	0	5	4	6	24.4	19	17.3	83.732	747	747	0	103.62	0	0	0	12.6	11.8	18.5	667450000	0	0	0	303090000	89295000	275060000	0
sp|Q62132|PTPRR_MOUSE	sp|Q62132|PTPRR_MOUSE	10	10	10	sp|Q62132|PTPRR_MOUSE Receptor-type tyrosine-protein phosphatase R OS=Mus musculus OX=10090 GN=Ptprr PE=1 SV=1	1	10	10	10	0	0	0	8	4	5	0	0	0	8	4	5	0	0	0	8	4	5	19.7	19.7	19.7	74.035	656	656	0	77.806	0	0	0	14.5	8.8	11.3	215520000	0	0	0	51005000	50391000	114120000	0
sp|Q9DBS2|TPRGL_MOUSE	sp|Q9DBS2|TPRGL_MOUSE	22	22	22	sp|Q9DBS2|TPRGL_MOUSE Tumor protein p63-regulated gene 1-like protein OS=Mus musculus OX=10090 GN=Tprg1l PE=1 SV=1	1	22	22	22	1	0	0	21	20	22	1	0	0	21	20	22	1	0	0	21	20	22	90.2	90.2	90.2	29.814	266	266	0	323.31	12	0	0	90.2	88.3	90.2	53088000000	6227600	0	0	14565000000	15852000000	22665000000	6879500
sp|P54310|LIPS_MOUSE	sp|P54310|LIPS_MOUSE	20	20	20	sp|P54310|LIPS_MOUSE Hormone-sensitive lipase OS=Mus musculus OX=10090 GN=Lipe PE=1 SV=2	1	20	20	20	0	0	2	11	10	15	0	0	2	11	10	15	0	0	2	11	10	15	31.8	31.8	31.8	83.347	759	759	0	159.94	0	0	4.1	17.5	15.2	26.5	735600000	0	0	3292000	228620000	165500000	338190000	0
sp|Q9DCN2|NB5R3_MOUSE	sp|Q9DCN2|NB5R3_MOUSE	8	8	8	sp|Q9DCN2|NB5R3_MOUSE NADH-cytochrome b5 reductase 3 OS=Mus musculus OX=10090 GN=Cyb5r3 PE=1 SV=3	1	8	8	8	0	0	1	4	5	8	0	0	1	4	5	8	0	0	1	4	5	8	35.5	35.5	35.5	34.127	301	301	0	31.812	0	0	4.3	18.3	19.6	35.5	313830000	0	0	3875500	44836000	64106000	201010000	0
sp|O35963|RB33B_MOUSE	sp|O35963|RB33B_MOUSE	8	8	6	sp|O35963|RB33B_MOUSE Ras-related protein Rab-33B OS=Mus musculus OX=10090 GN=Rab33b PE=1 SV=1	1	8	8	6	1	0	0	7	7	6	1	0	0	7	7	6	0	0	0	5	6	4	42.8	42.8	33.6	25.766	229	229	0	39.024	4.8	0	0	34.9	38.4	31.4	684650000	0	0	0	306380000	137590000	240680000	0
sp|Q9QYY8|SPAST_MOUSE	sp|Q9QYY8|SPAST_MOUSE	2	2	2	sp|Q9QYY8|SPAST_MOUSE Spastin OS=Mus musculus OX=10090 GN=Spast PE=1 SV=3	1	2	2	2	1	0	0	1	1	1	1	0	0	1	1	1	1	0	0	1	1	1	4.9	4.9	4.9	66.455	614	614	0.0037175	2.7501	2.4	0	0	2.4	2.4	2.4	48460000	0	0	0	10494000	9883200	28083000	0
sp|P49586|PCY1A_MOUSE	sp|P49586|PCY1A_MOUSE	25	25	18	sp|P49586|PCY1A_MOUSE Choline-phosphate cytidylyltransferase A OS=Mus musculus OX=10090 GN=Pcyt1a PE=1 SV=1	1	25	25	18	3	0	2	18	21	19	3	0	2	18	21	19	1	0	1	11	15	13	67	67	53.7	41.666	367	367	0	323.31	11.2	0	8.4	54.2	62.7	57.8	12039000000	14808000	0	8953500	1573100000	4673900000	5768500000	11370000
sp|Q9JKV5|SCAM4_MOUSE	sp|Q9JKV5|SCAM4_MOUSE	3	3	3	sp|Q9JKV5|SCAM4_MOUSE Secretory carrier-associated membrane protein 4 OS=Mus musculus OX=10090 GN=Scamp4 PE=1 SV=1	1	3	3	3	0	0	0	2	3	3	0	0	0	2	3	3	0	0	0	2	3	3	32.2	32.2	32.2	25.342	230	230	0	110.8	0	0	0	17.4	32.2	32.2	715450000	0	0	0	177900000	275170000	262370000	0
sp|Q9R1V7|ADA23_MOUSE	sp|Q9R1V7|ADA23_MOUSE	5	5	5	sp|Q9R1V7|ADA23_MOUSE Disintegrin and metalloproteinase domain-containing protein 23 OS=Mus musculus OX=10090 GN=Adam23 PE=1 SV=1	1	5	5	5	0	0	0	3	3	3	0	0	0	3	3	3	0	0	0	3	3	3	9	9	9	91.547	829	829	0	15.899	0	0	0	5.3	5.8	6.5	164670000	0	0	0	50881000	45072000	68718000	0
sp|Q923G2|RPAB3_MOUSE	sp|Q923G2|RPAB3_MOUSE	5	5	5	sp|Q923G2|RPAB3_MOUSE DNA-directed RNA polymerases I, II, and III subunit RPABC3 OS=Mus musculus OX=10090 GN=Polr2h PE=1 SV=3	1	5	5	5	0	0	0	4	4	4	0	0	0	4	4	4	0	0	0	4	4	4	34	34	34	17.143	150	150	0	150.88	0	0	0	23.3	32	32	163070000	0	0	0	20011000	72975000	70085000	0
sp|P97390|VPS45_MOUSE	sp|P97390|VPS45_MOUSE	34	34	34	sp|P97390|VPS45_MOUSE Vacuolar protein sorting-associated protein 45 OS=Mus musculus OX=10090 GN=Vps45 PE=1 SV=1	1	34	34	34	4	3	5	27	22	26	4	3	5	27	22	26	4	3	5	27	22	26	51.8	51.8	51.8	65.052	570	570	0	323.31	9.5	6.8	9.6	42.6	38.6	42.3	5077000000	13302000	4059200	27962000	1409400000	1421200000	2201100000	4513800
sp|Q9DBG3|AP2B1_MOUSE	sp|Q9DBG3|AP2B1_MOUSE	73	73	45	sp|Q9DBG3|AP2B1_MOUSE AP-2 complex subunit beta OS=Mus musculus OX=10090 GN=Ap2b1 PE=1 SV=1	1	73	73	45	31	9	32	69	52	66	31	9	32	69	52	66	15	4	16	42	30	40	69.9	69.9	50.7	104.58	937	937	0	323.31	33.2	10.8	35.4	69.9	61.4	61	71734000000	1013400000	48934000	1160700000	24135000000	14131000000	31245000000	629980000
sp|E9Q4P1|WDFY1_MOUSE	sp|E9Q4P1|WDFY1_MOUSE	31	31	31	sp|E9Q4P1|WDFY1_MOUSE WD repeat and FYVE domain-containing protein 1 OS=Mus musculus OX=10090 GN=Wdfy1 PE=1 SV=1	1	31	31	31	1	0	0	29	26	29	1	0	0	29	26	29	1	0	0	29	26	29	71.7	71.7	71.7	46.217	410	410	0	323.31	2.7	0	0	64.9	71.5	71.7	36176000000	1835700	0	0	5236700000	11610000000	19327000000	1562000
sp|P61264|STX1B_MOUSE	sp|P61264|STX1B_MOUSE	21	21	20	sp|P61264|STX1B_MOUSE Syntaxin-1B OS=Mus musculus OX=10090 GN=Stx1b PE=1 SV=1	1	21	21	20	3	1	3	17	19	21	3	1	3	17	19	21	3	1	3	16	18	20	62.2	62.2	59.7	33.244	288	288	0	323.31	13.2	4.9	13.2	54.5	49.3	62.2	32028000000	5371200	2260400	15161000	5611200000	10545000000	15849000000	4089200
sp|Q99PJ0|NTRI_MOUSE	sp|Q99PJ0|NTRI_MOUSE	12	12	12	sp|Q99PJ0|NTRI_MOUSE Neurotrimin OS=Mus musculus OX=10090 GN=Ntm PE=1 SV=2	1	12	12	12	0	0	0	11	8	10	0	0	0	11	8	10	0	0	0	11	8	10	34.9	34.9	34.9	37.984	344	344	0	323.31	0	0	0	32.6	32.8	32	2794700000	0	0	0	1236600000	681910000	876160000	0
sp|O35526|STX1A_MOUSE	sp|O35526|STX1A_MOUSE	21	20	20	sp|O35526|STX1A_MOUSE Syntaxin-1A OS=Mus musculus OX=10090 GN=Stx1a PE=1 SV=3	1	21	20	20	0	0	0	13	14	19	0	0	0	12	13	18	0	0	0	12	13	18	56.9	54.5	54.5	33.054	288	288	0	323.31	0	0	0	46.2	34.4	43.1	3948700000	0	0	0	613610000	1326200000	2008900000	0
sp|Q8BPN8|DMXL2_MOUSE	sp|Q8BPN8|DMXL2_MOUSE	158	158	156	sp|Q8BPN8|DMXL2_MOUSE DmX-like protein 2 OS=Mus musculus OX=10090 GN=Dmxl2 PE=1 SV=3	1	158	158	156	30	0	26	133	117	124	30	0	26	133	117	124	30	0	26	131	115	122	58.7	58.7	58.2	338.2	3032	3032	0	323.31	12.8	0	11.7	49.9	46.5	48.4	27049000000	117650000	0	163190000	7567200000	11405000000	7796000000	91405000
sp|O08599|STXB1_MOUSE	sp|O08599|STXB1_MOUSE	56	56	56	sp|O08599|STXB1_MOUSE Syntaxin-binding protein 1 OS=Mus musculus OX=10090 GN=Stxbp1 PE=1 SV=2	1	56	56	56	21	5	18	50	45	49	21	5	18	50	45	49	21	5	18	50	45	49	84.5	84.5	84.5	67.568	594	594	0	323.31	45.8	10.6	34.5	80.3	78.8	81.8	67770000000	1058800000	15947000	417490000	28033000000	16874000000	21371000000	466920000
sp|Q6PGE7|SC6A7_MOUSE	sp|Q6PGE7|SC6A7_MOUSE	14	14	14	sp|Q6PGE7|SC6A7_MOUSE Sodium-dependent proline transporter OS=Mus musculus OX=10090 GN=Slc6a7 PE=1 SV=1	1	14	14	14	0	0	0	13	13	14	0	0	0	13	13	14	0	0	0	13	13	14	21.2	21.2	21.2	71.065	637	637	0	323.31	0	0	0	21	21	21.2	6126400000	0	0	0	1626800000	2042200000	2457400000	0
sp|Q924N4|S12A6_MOUSE;sp|Q9JIS8|S12A4_MOUSE	sp|Q924N4|S12A6_MOUSE	10;4	6;2	6;2	sp|Q924N4|S12A6_MOUSE Solute carrier family 12 member 6 OS=Mus musculus OX=10090 GN=Slc12a6 PE=1 SV=2	2	10	6	6	1	0	0	6	8	7	0	0	0	3	5	6	0	0	0	3	5	6	8.8	5.8	5.8	127.53	1150	1150;1085	0	13.704	1	0	0	4.6	7	6.8	93487000	0	0	0	11742000	39584000	42161000	0
sp|Q9JMB8|CNTN6_MOUSE	sp|Q9JMB8|CNTN6_MOUSE	3	3	3	sp|Q9JMB8|CNTN6_MOUSE Contactin-6 OS=Mus musculus OX=10090 GN=Cntn6 PE=1 SV=2	1	3	3	3	0	0	0	2	1	2	0	0	0	2	1	2	0	0	0	2	1	2	4.5	4.5	4.5	113.76	1028	1028	0.00072543	3.5478	0	0	0	2.4	1.3	3.2	9226800	0	0	0	3392400	2998900	2835500	0
sp|O35682|MYADM_MOUSE	sp|O35682|MYADM_MOUSE	2	2	2	sp|O35682|MYADM_MOUSE Myeloid-associated differentiation marker OS=Mus musculus OX=10090 GN=Myadm PE=1 SV=2	1	2	2	2	0	0	0	2	2	2	0	0	0	2	2	2	0	0	0	2	2	2	8.4	8.4	8.4	35.284	320	320	0	5.8574	0	0	0	8.4	8.4	8.4	83211000	0	0	0	14848000	32429000	35934000	0
sp|P12960|CNTN1_MOUSE	sp|P12960|CNTN1_MOUSE	53	53	53	sp|P12960|CNTN1_MOUSE Contactin-1 OS=Mus musculus OX=10090 GN=Cntn1 PE=1 SV=1	1	53	53	53	21	0	8	52	42	41	21	0	8	52	42	41	21	0	8	52	42	41	56.9	56.9	56.9	113.39	1020	1020	0	323.31	29.2	0	7.7	56.4	51	48.2	11455000000	193730000	0	99797000	3483400000	4851100000	2827400000	78564000
sp|P31324|KAP3_MOUSE	sp|P31324|KAP3_MOUSE	18	18	15	sp|P31324|KAP3_MOUSE cAMP-dependent protein kinase type II-beta regulatory subunit OS=Mus musculus OX=10090 GN=Prkar2b PE=1 SV=3	1	18	18	15	9	0	5	17	14	12	9	0	5	17	14	12	7	0	3	14	12	9	61.3	61.3	51.4	46.167	416	416	0	323.31	36.5	0	18.3	54.8	49	37.5	6630600000	348830000	0	126130000	2529400000	1930300000	1695900000	50857000
sp|Q8JZW4|CPNE5_MOUSE;sp|Q1RLL3|CPNE9_MOUSE;sp|Q9DC53|CPNE8_MOUSE	sp|Q8JZW4|CPNE5_MOUSE	26;8;8	26;8;8	25;7;7	sp|Q8JZW4|CPNE5_MOUSE Copine-5 OS=Mus musculus OX=10090 GN=Cpne5 PE=1 SV=1	3	26	26	25	1	0	0	24	19	20	1	0	0	24	19	20	0	0	0	23	18	19	47.2	47.2	47.2	65.592	593	593;553;577	0	323.31	1.5	0	0	47.2	34.9	30.2	4158600000	14674000	0	0	1674900000	1190900000	1278100000	5565100
sp|Q9CPS6|HINT3_MOUSE	sp|Q9CPS6|HINT3_MOUSE	7	7	7	sp|Q9CPS6|HINT3_MOUSE Histidine triad nucleotide-binding protein 3 OS=Mus musculus OX=10090 GN=Hint3 PE=1 SV=1	1	7	7	7	4	0	2	6	4	6	4	0	2	6	4	6	4	0	2	6	4	6	53.9	53.9	53.9	18.787	165	165	0	223.22	35.2	0	15.2	35.2	35.2	53.9	2461700000	20590000	0	8605300	629740000	626910000	1175900000	28226000
sp|Q8VEK0|CC50A_MOUSE;sp|Q8BHG3|CC50B_MOUSE	sp|Q8VEK0|CC50A_MOUSE	17;2	17;2	17;2	sp|Q8VEK0|CC50A_MOUSE Cell cycle control protein 50A OS=Mus musculus OX=10090 GN=Tmem30a PE=1 SV=1	2	17	17	17	0	0	0	17	15	16	0	0	0	17	15	16	0	0	0	17	15	16	42.3	42.3	42.3	41.06	364	364;353	0	323.31	0	0	0	42.3	40.7	42.3	7821400000	0	0	0	2278300000	2311400000	3231700000	0
sp|Q8BVE3|VATH_MOUSE	sp|Q8BVE3|VATH_MOUSE	43	43	43	sp|Q8BVE3|VATH_MOUSE V-type proton ATPase subunit H OS=Mus musculus OX=10090 GN=Atp6v1h PE=1 SV=1	1	43	43	43	10	0	3	39	31	38	10	0	3	39	31	38	10	0	3	39	31	38	78.7	78.7	78.7	55.854	483	483	0	323.31	33.3	0	8.5	74.3	70.2	74.5	206930000000	242230000	0	79412000	70745000000	56012000000	79850000000	36479000
sp|P08556|RASN_MOUSE	sp|P08556|RASN_MOUSE	6	3	2	sp|P08556|RASN_MOUSE GTPase NRas OS=Mus musculus OX=10090 GN=Nras PE=1 SV=1	1	6	3	2	0	0	1	4	5	6	0	0	1	2	2	3	0	0	0	1	1	2	32.3	19	12.7	21.199	189	189	0	35.26	0	0	6.3	18.5	24.3	32.3	304760000	0	0	5269500	57889000	81413000	160190000	0
sp|Q3TXX4|VGLU1_MOUSE;sp|Q61983|NPT1_MOUSE;sp|Q5SZA1|NPT3_MOUSE	sp|Q3TXX4|VGLU1_MOUSE	23;1;1	19;0;0	18;0;0	sp|Q3TXX4|VGLU1_MOUSE Vesicular glutamate transporter 1 OS=Mus musculus OX=10090 GN=Slc17a7 PE=1 SV=2	3	23	19	18	1	0	1	22	18	21	1	0	0	18	14	17	1	0	0	17	13	16	36.4	26.8	25.5	61.637	560	560;465;478	0	323.31	2	0	1.8	35.5	35	36.4	38825000000	17222000	0	0	12755000000	11531000000	14522000000	3470800
sp|Q8K448|ABCA5_MOUSE	sp|Q8K448|ABCA5_MOUSE	12	12	12	sp|Q8K448|ABCA5_MOUSE ATP-binding cassette sub-family A member 5 OS=Mus musculus OX=10090 GN=Abca5 PE=1 SV=2	1	12	12	12	0	0	0	8	6	8	0	0	0	8	6	8	0	0	0	8	6	8	10	10	10	185.89	1642	1642	0	34.9	0	0	0	6.5	4.9	6.8	145860000	0	0	0	31614000	53652000	60599000	0
sp|Q8C7K6|PCYXL_MOUSE	sp|Q8C7K6|PCYXL_MOUSE	9	9	9	sp|Q8C7K6|PCYXL_MOUSE Prenylcysteine oxidase-like OS=Mus musculus OX=10090 GN=Pcyox1l PE=1 SV=1	1	9	9	9	0	0	0	8	3	3	0	0	0	8	3	3	0	0	0	8	3	3	24.6	24.6	24.6	54.874	495	495	0	75.974	0	0	0	19.8	10.9	10.9	490850000	0	0	0	181540000	143450000	165850000	0
sp|P35276|RAB3D_MOUSE	sp|P35276|RAB3D_MOUSE	5	2	2	sp|P35276|RAB3D_MOUSE Ras-related protein Rab-3D OS=Mus musculus OX=10090 GN=Rab3d PE=1 SV=1	1	5	2	2	3	1	3	5	4	5	1	0	1	2	1	2	1	0	1	2	1	2	26	10	10	24.416	219	219	0	17.595	17.4	8.7	17.4	26	21	26	21231000000	429820000	0	617510000	5054000000	6853700000	8276100000	76237000
sp|P35288|RAB23_MOUSE	sp|P35288|RAB23_MOUSE	10	10	10	sp|P35288|RAB23_MOUSE Ras-related protein Rab-23 OS=Mus musculus OX=10090 GN=Rab23 PE=1 SV=2	1	10	10	10	1	0	1	9	6	7	1	0	1	9	6	7	1	0	1	9	6	7	43.5	43.5	43.5	26.678	237	237	0	311.17	4.2	0	6.8	38.8	36.7	42.2	1610900000	0	0	1468300	760280000	449600000	399540000	0
sp|P50518|VATE1_MOUSE;sp|Q9D593|VATE2_MOUSE	sp|P50518|VATE1_MOUSE	30;7	30;7	30;7	sp|P50518|VATE1_MOUSE V-type proton ATPase subunit E 1 OS=Mus musculus OX=10090 GN=Atp6v1e1 PE=1 SV=2	2	30	30	30	7	3	6	27	28	27	7	3	6	27	28	27	7	3	6	27	28	27	82.3	82.3	82.3	26.157	226	226;226	0	323.31	33.2	15	29.2	75.7	81	76.1	230770000000	158820000	33532000	145260000	43087000000	62473000000	124870000000	134870000
sp|Q8R570|SNP47_MOUSE	sp|Q8R570|SNP47_MOUSE	30	30	30	sp|Q8R570|SNP47_MOUSE Synaptosomal-associated protein 47 OS=Mus musculus OX=10090 GN=Snap47 PE=1 SV=1	1	30	30	30	11	0	12	25	23	23	11	0	12	25	23	23	11	0	12	25	23	23	77	77	77	46.524	413	413	0	323.31	36.8	0	42.1	68.3	72.2	75.3	17702000000	402160000	0	712070000	3821800000	6608000000	6157900000	111520000
sp|P60879|SNP25_MOUSE;sp|O09044|SNP23_MOUSE	sp|P60879|SNP25_MOUSE	25;1	25;1	25;1	sp|P60879|SNP25_MOUSE Synaptosomal-associated protein 25 OS=Mus musculus OX=10090 GN=Snap25 PE=1 SV=1	2	25	25	25	1	0	0	25	18	17	1	0	0	25	18	17	1	0	0	25	18	17	81.1	81.1	81.1	23.315	206	206;210	0	323.31	7.8	0	0	81.1	77.7	72.3	13689000000	0	0	0	7535400000	3025200000	3128400000	0
sp|Q91WL5|CP4CA_MOUSE	sp|Q91WL5|CP4CA_MOUSE	1	1	1	sp|Q91WL5|CP4CA_MOUSE Cytochrome P450 4A12A OS=Mus musculus OX=10090 GN=Cyp4a12a PE=1 SV=2	1	1	1	1	1	0	1	1	1	1	1	0	1	1	1	1	1	0	1	1	1	1	2.2	2.2	2.2	58.349	508	508	0.0042947	2.5577	2.2	0	2.2	2.2	2.2	2.2	1693000000	0	0	33429000	162760000	840080000	656770000	0
sp|Q9DBG5|PLIN3_MOUSE	sp|Q9DBG5|PLIN3_MOUSE	10	10	10	sp|Q9DBG5|PLIN3_MOUSE Perilipin-3 OS=Mus musculus OX=10090 GN=Plin3 PE=1 SV=1	1	10	10	10	2	0	2	5	7	8	2	0	2	5	7	8	2	0	2	5	7	8	35.2	35.2	35.2	47.262	437	437	0	138.17	7.8	0	6.9	14.4	26.8	28.6	499270000	35926000	0	13598000	101920000	190300000	157520000	3780800
sp|Q91ZR1|RAB4B_MOUSE	sp|Q91ZR1|RAB4B_MOUSE	13	13	11	sp|Q91ZR1|RAB4B_MOUSE Ras-related protein Rab-4B OS=Mus musculus OX=10090 GN=Rab4b PE=1 SV=2	1	13	13	11	4	0	3	8	11	13	4	0	3	8	11	13	3	0	2	7	9	11	72.8	72.8	66.2	23.629	213	213	0	150.67	23.9	0	17.4	45.5	53.1	72.8	2319300000	42535000	0	29838000	383410000	759250000	1104300000	24187000
sp|P08775|RPB1_MOUSE	sp|P08775|RPB1_MOUSE	68	68	68	sp|P08775|RPB1_MOUSE DNA-directed RNA polymerase II subunit RPB1 OS=Mus musculus OX=10090 GN=Polr2a PE=1 SV=3	1	68	68	68	0	0	0	46	37	59	0	0	0	46	37	59	0	0	0	46	37	59	42.2	42.2	42.2	217.17	1970	1970	0	323.31	0	0	0	31.4	25.3	36.2	2588100000	0	0	0	527770000	930790000	1129600000	0
sp|Q6PHN9|RAB35_MOUSE	sp|Q6PHN9|RAB35_MOUSE	11	10	10	sp|Q6PHN9|RAB35_MOUSE Ras-related protein Rab-35 OS=Mus musculus OX=10090 GN=Rab35 PE=1 SV=1	1	11	10	10	7	0	3	10	10	8	7	0	3	9	9	7	7	0	3	9	9	7	57.7	51.2	51.2	23.025	201	201	0	323.31	34.8	0	15.4	48.3	57.7	41.3	3400800000	209310000	0	120410000	853090000	1343900000	874170000	35607000
sp|P05480|SRC_MOUSE;sp|Q62270|SRMS_MOUSE;sp|P06240|LCK_MOUSE;sp|Q62190|RON_MOUSE;sp|P16056|MET_MOUSE	sp|P05480|SRC_MOUSE	8;1;1;1;1	6;1;0;1;1	5;0;0;0;0	sp|P05480|SRC_MOUSE Neuronal proto-oncogene tyrosine-protein kinase Src OS=Mus musculus OX=10090 GN=Src PE=1 SV=4	5	8	6	5	2	0	0	4	5	8	1	0	0	3	4	6	1	0	0	3	3	5	17.6	13.7	12.2	60.644	541	541;496;509;1378;1379	0	23.026	4.8	0	0	8.7	10.5	17.6	102750000	0	0	0	12409000	38710000	51635000	0
sp|Q9ERB0|SNP29_MOUSE	sp|Q9ERB0|SNP29_MOUSE	18	18	18	sp|Q9ERB0|SNP29_MOUSE Synaptosomal-associated protein 29 OS=Mus musculus OX=10090 GN=Snap29 PE=1 SV=1	1	18	18	18	0	0	3	11	13	13	0	0	3	11	13	13	0	0	3	11	13	13	67.7	67.7	67.7	29.572	260	260	0	278.59	0	0	19.6	45	56.5	50.4	3195400000	0	0	24679000	649940000	886530000	1634300000	0
sp|Q6AXF6|SIDT1_MOUSE	sp|Q6AXF6|SIDT1_MOUSE	6	6	6	sp|Q6AXF6|SIDT1_MOUSE SID1 transmembrane family member 1 OS=Mus musculus OX=10090 GN=Sidt1 PE=1 SV=1	1	6	6	6	0	0	0	2	4	6	0	0	0	2	4	6	0	0	0	2	4	6	10	10	10	93.894	827	827	0	184.76	0	0	0	2.3	5.7	10	710040000	0	0	0	54911000	250750000	404380000	0
sp|O55100|SNG1_MOUSE	sp|O55100|SNG1_MOUSE	6	6	6	sp|O55100|SNG1_MOUSE Synaptogyrin-1 OS=Mus musculus OX=10090 GN=Syngr1 PE=1 SV=2	1	6	6	6	3	0	2	5	4	6	3	0	2	5	4	6	3	0	2	5	4	6	15.4	15.4	15.4	25.652	234	234	0	162.29	14.5	0	10.3	15.4	15.4	15.4	98857000000	35158000	0	45774000	42032000000	25959000000	30786000000	33174000
sp|P15209|NTRK2_MOUSE	sp|P15209|NTRK2_MOUSE	11	11	7	sp|P15209|NTRK2_MOUSE BDNF/NT-3 growth factors receptor OS=Mus musculus OX=10090 GN=Ntrk2 PE=1 SV=1	1	11	11	7	0	0	0	4	5	10	0	0	0	4	5	10	0	0	0	4	5	6	18.4	18.4	13.2	92.132	821	821	0	60.223	0	0	0	7.7	10.1	17.1	291370000	0	0	0	45979000	85859000	159530000	0
sp|Q62283|TSN7_MOUSE	sp|Q62283|TSN7_MOUSE	4	4	4	sp|Q62283|TSN7_MOUSE Tetraspanin-7 OS=Mus musculus OX=10090 GN=Tspan7 PE=1 SV=2	1	4	4	4	0	0	0	3	3	4	0	0	0	3	3	4	0	0	0	3	3	4	18.1	18.1	18.1	27.544	249	249	0	73.734	0	0	0	13.7	13.7	18.1	605060000	0	0	0	151650000	173380000	280030000	0
sp|Q8JZM4|DNER_MOUSE	sp|Q8JZM4|DNER_MOUSE	6	6	6	sp|Q8JZM4|DNER_MOUSE Delta and Notch-like epidermal growth factor-related receptor OS=Mus musculus OX=10090 GN=Dner PE=1 SV=1	1	6	6	6	0	0	0	3	4	4	0	0	0	3	4	4	0	0	0	3	4	4	9.2	9.2	9.2	78.747	737	737	0	35.208	0	0	0	6	7.9	7.1	55745000	0	0	0	7636300	14849000	33260000	0
sp|P58281|OPA1_MOUSE	sp|P58281|OPA1_MOUSE	8	8	8	sp|P58281|OPA1_MOUSE Dynamin-like 120 kDa protein, mitochondrial OS=Mus musculus OX=10090 GN=Opa1 PE=1 SV=1	1	8	8	8	0	0	0	7	2	3	0	0	0	7	2	3	0	0	0	7	2	3	9.3	9.3	9.3	111.34	960	960	0	12.395	0	0	0	8.1	2.2	3.3	78253000	0	0	0	38403000	9611600	30238000	0
sp|Q9ER00|STX12_MOUSE	sp|Q9ER00|STX12_MOUSE	12	12	12	sp|Q9ER00|STX12_MOUSE Syntaxin-12 OS=Mus musculus OX=10090 GN=Stx12 PE=1 SV=1	1	12	12	12	1	2	2	10	10	11	1	2	2	10	10	11	1	2	2	10	10	11	45.3	45.3	45.3	31.195	274	274	0	323.31	3.3	10.6	8.8	44.5	42	45.3	9900000000	2669100	2918200	7599200	1821900000	2458500000	5606400000	1585100
sp|P63001|RAC1_MOUSE;sp|Q05144|RAC2_MOUSE	sp|P63001|RAC1_MOUSE	11;5	11;5	4;1	sp|P63001|RAC1_MOUSE Ras-related C3 botulinum toxin substrate 1 OS=Mus musculus OX=10090 GN=Rac1 PE=1 SV=1	2	11	11	4	9	1	6	10	9	9	9	1	6	10	9	9	3	0	2	4	3	4	54.7	54.7	21.4	21.45	192	192;192	0	43.54	46.9	5.2	34.4	54.2	39.6	45.3	4594800000	135000000	7489400	118020000	1089500000	1362500000	1882300000	112220000
sp|Q920M7|SYT17_MOUSE	sp|Q920M7|SYT17_MOUSE	23	23	23	sp|Q920M7|SYT17_MOUSE Synaptotagmin-17 OS=Mus musculus OX=10090 GN=Syt17 PE=1 SV=1	1	23	23	23	0	0	0	17	19	22	0	0	0	17	19	22	0	0	0	17	19	22	56.2	56.2	56.2	53.293	470	470	0	323.31	0	0	0	46.8	48.1	52.8	3860600000	0	0	0	1072600000	1228700000	1559300000	0
sp|Q9CQD1|RAB5A_MOUSE	sp|Q9CQD1|RAB5A_MOUSE	11	8	8	sp|Q9CQD1|RAB5A_MOUSE Ras-related protein Rab-5A OS=Mus musculus OX=10090 GN=Rab5a PE=1 SV=1	1	11	8	8	8	0	7	11	9	10	5	0	4	8	6	7	5	0	4	8	6	7	70.7	55.8	55.8	23.598	215	215	0	323.31	53.5	0	42.3	70.7	56.7	57.7	6824100000	555130000	0	266660000	2070400000	1933100000	1998700000	83026000
sp|E9Q735|UBE4A_MOUSE	sp|E9Q735|UBE4A_MOUSE	5	5	5	sp|E9Q735|UBE4A_MOUSE Ubiquitin conjugation factor E4 A OS=Mus musculus OX=10090 GN=Ube4a PE=1 SV=1	1	5	5	5	0	0	1	3	4	3	0	0	1	3	4	3	0	0	1	3	4	3	7.4	7.4	7.4	118.2	1028	1028	0	13.214	0	0	1.4	3.8	5.8	3.4	45790000	0	0	1138900	7853900	28957000	7840300	0
sp|O70443|GNAZ_MOUSE	sp|O70443|GNAZ_MOUSE	17	17	16	sp|O70443|GNAZ_MOUSE Guanine nucleotide-binding protein G(z) subunit alpha OS=Mus musculus OX=10090 GN=Gnaz PE=1 SV=4	1	17	17	16	0	0	0	8	12	13	0	0	0	8	12	13	0	0	0	7	12	13	50.1	50.1	47.9	40.849	355	355	0	260.8	0	0	0	25.1	40.3	40.3	1105500000	0	0	0	76555000	330560000	698410000	0
sp|Q8K386|RAB15_MOUSE	sp|Q8K386|RAB15_MOUSE	9	8	8	sp|Q8K386|RAB15_MOUSE Ras-related protein Rab-15 OS=Mus musculus OX=10090 GN=Rab15 PE=1 SV=1	1	9	8	8	1	0	1	5	5	9	0	0	0	4	4	8	0	0	0	4	4	8	59.9	54.7	54.7	24.318	212	212	0	91.826	5.2	0	5.2	37.7	37.7	59.9	457480000	0	0	0	87344000	163340000	206800000	0
sp|Q8CA71|SHSA4_MOUSE	sp|Q8CA71|SHSA4_MOUSE	2	2	2	sp|Q8CA71|SHSA4_MOUSE Protein shisa-4 OS=Mus musculus OX=10090 GN=Shisa4 PE=1 SV=1	1	2	2	2	0	0	0	2	2	2	0	0	0	2	2	2	0	0	0	2	2	2	8.6	8.6	8.6	21.483	197	197	0	4.6006	0	0	0	8.6	8.6	8.6	233840000	0	0	0	36336000	85972000	111530000	0
sp|Q99N28|CADM3_MOUSE	sp|Q99N28|CADM3_MOUSE	10	10	10	sp|Q99N28|CADM3_MOUSE Cell adhesion molecule 3 OS=Mus musculus OX=10090 GN=Cadm3 PE=1 SV=1	1	10	10	10	0	0	0	6	6	10	0	0	0	6	6	10	0	0	0	6	6	10	37.6	37.6	37.6	42.964	396	396	0	85.906	0	0	0	24	24	37.6	1370000000	0	0	0	360660000	411400000	597930000	0
sp|P63011|RAB3A_MOUSE	sp|P63011|RAB3A_MOUSE	17	17	14	sp|P63011|RAB3A_MOUSE Ras-related protein Rab-3A OS=Mus musculus OX=10090 GN=Rab3a PE=1 SV=1	1	17	17	14	9	2	7	13	12	16	9	2	7	13	12	16	6	1	5	10	10	14	70	70	45	24.97	220	220	0	323.31	58.6	15.9	42.7	65	57.3	57.3	76648000000	2163500000	57346000	2202900000	18932000000	22890000000	30403000000	411660000
sp|P06837|NEUM_MOUSE	sp|P06837|NEUM_MOUSE	8	8	8	sp|P06837|NEUM_MOUSE Neuromodulin OS=Mus musculus OX=10090 GN=Gap43 PE=1 SV=1	1	8	8	8	0	0	0	5	4	6	0	0	0	5	4	6	0	0	0	5	4	6	51.1	51.1	51.1	23.632	227	227	0	58.899	0	0	0	37	34.8	49.3	323920000	0	0	0	123480000	63433000	137010000	0
sp|P60766|CDC42_MOUSE	sp|P60766|CDC42_MOUSE	9	8	8	sp|P60766|CDC42_MOUSE Cell division control protein 42 homolog OS=Mus musculus OX=10090 GN=Cdc42 PE=1 SV=2	1	9	8	8	3	1	3	6	8	7	2	1	2	5	7	6	2	1	2	5	7	6	57.6	51.8	51.8	21.258	191	191	0	323.31	20.4	8.9	19.9	37.2	42.9	51.8	2319200000	42032000	12131000	69141000	482500000	1049400000	663990000	53150000
sp|Q8BMS1|ECHA_MOUSE	sp|Q8BMS1|ECHA_MOUSE	18	18	18	sp|Q8BMS1|ECHA_MOUSE Trifunctional enzyme subunit alpha, mitochondrial OS=Mus musculus OX=10090 GN=Hadha PE=1 SV=1	1	18	18	18	1	0	2	16	8	8	1	0	2	16	8	8	1	0	2	16	8	8	29	29	29	82.669	763	763	0	93.358	2.8	0	3.8	26.6	13.6	14.3	905710000	13065000	0	3710500	535620000	174850000	178460000	4649800
sp|Q8CFI7|RPB2_MOUSE	sp|Q8CFI7|RPB2_MOUSE	52	52	52	sp|Q8CFI7|RPB2_MOUSE DNA-directed RNA polymerase II subunit RPB2 OS=Mus musculus OX=10090 GN=Polr2b PE=1 SV=2	1	52	52	52	0	0	1	41	24	40	0	0	1	41	24	40	0	0	1	41	24	40	47.5	47.5	47.5	133.91	1174	1174	0	287.51	0	0	1.2	39.2	22.3	39.9	1783300000	0	0	1930500	489820000	489210000	802360000	0
sp|Q8C996|TM163_MOUSE	sp|Q8C996|TM163_MOUSE	11	11	11	sp|Q8C996|TM163_MOUSE Transmembrane protein 163 OS=Mus musculus OX=10090 GN=Tmem163 PE=1 SV=1	1	11	11	11	0	0	0	10	8	10	0	0	0	10	8	10	0	0	0	10	8	10	32.6	32.6	32.6	31.193	288	288	0	323.31	0	0	0	32.6	28.5	28.5	4249300000	0	0	0	1553600000	1125500000	1570200000	0
sp|Q8C561|LMBD2_MOUSE	sp|Q8C561|LMBD2_MOUSE	7	7	7	sp|Q8C561|LMBD2_MOUSE G-protein coupled receptor-associated protein LMBRD2 OS=Mus musculus OX=10090 GN=Lmbrd2 PE=1 SV=1	1	7	7	7	0	0	0	7	2	4	0	0	0	7	2	4	0	0	0	7	2	4	9.9	9.9	9.9	81.1	694	694	0	34.925	0	0	0	9.9	2.2	6.3	158440000	0	0	0	76673000	27501000	54268000	0
sp|P62823|RAB3C_MOUSE	sp|P62823|RAB3C_MOUSE	14	12	11	sp|P62823|RAB3C_MOUSE Ras-related protein Rab-3C OS=Mus musculus OX=10090 GN=Rab3c PE=1 SV=1	1	14	12	11	4	0	4	14	12	12	2	0	3	12	11	11	2	0	3	11	10	10	68.3	52.4	52.4	25.872	227	227	0	323.31	29.1	0	23.3	68.3	53.3	53.3	10653000000	86390000	0	165250000	2931300000	3162400000	4307300000	18467000
sp|B2RXC1|TPC11_MOUSE	sp|B2RXC1|TPC11_MOUSE	20	20	20	sp|B2RXC1|TPC11_MOUSE Trafficking protein particle complex subunit 11 OS=Mus musculus OX=10090 GN=Trappc11 PE=1 SV=1	1	20	20	20	1	0	1	15	11	12	1	0	1	15	11	12	1	0	1	15	11	12	19.6	19.6	19.6	128.39	1133	1133	0	77.789	0.9	0	0.9	14.6	11.7	10.8	340440000	0	0	708180	137400000	102490000	99838000	0
sp|Q8BYK4|RDH12_MOUSE	sp|Q8BYK4|RDH12_MOUSE	1	1	1	sp|Q8BYK4|RDH12_MOUSE Retinol dehydrogenase 12 OS=Mus musculus OX=10090 GN=Rdh12 PE=2 SV=1	1	1	1	1	0	0	0	1	1	1	0	0	0	1	1	1	0	0	0	1	1	1	2.5	2.5	2.5	35.292	316	316	0	4.5391	0	0	0	2.5	2.5	2.5	371810000	0	0	0	102710000	60823000	208270000	0
sp|P17426|AP2A1_MOUSE	sp|P17426|AP2A1_MOUSE	71	71	55	sp|P17426|AP2A1_MOUSE AP-2 complex subunit alpha-1 OS=Mus musculus OX=10090 GN=Ap2a1 PE=1 SV=1	1	71	71	55	42	7	37	62	53	67	42	7	37	62	53	67	31	4	24	49	40	51	72.4	72.4	57.3	107.66	977	977	0	323.31	48.5	9.2	42.7	69.2	57.6	68.1	86171000000	1152700000	34745000	1312500000	27074000000	17036000000	39561000000	815000000
sp|Q80YA3|DDHD1_MOUSE	sp|Q80YA3|DDHD1_MOUSE	13	13	13	sp|Q80YA3|DDHD1_MOUSE Phospholipase DDHD1 OS=Mus musculus OX=10090 GN=Ddhd1 PE=1 SV=1	1	13	13	13	1	0	2	9	7	8	1	0	2	9	7	8	1	0	2	9	7	8	32	32	32	61.822	547	547	0	25.735	2	0	3.5	18.8	13.7	22.1	246310000	1848400	0	4071800	136370000	56126000	47888000	855270
sp|Q9QZ88|VPS29_MOUSE	sp|Q9QZ88|VPS29_MOUSE	5	5	5	sp|Q9QZ88|VPS29_MOUSE Vacuolar protein sorting-associated protein 29 OS=Mus musculus OX=10090 GN=Vps29 PE=1 SV=1	1	5	5	5	0	0	0	3	1	3	0	0	0	3	1	3	0	0	0	3	1	3	37.4	37.4	37.4	20.495	182	182	0	11.258	0	0	0	20.3	5.5	22.5	125550000	0	0	0	23239000	14869000	87440000	0
sp|O08576|RUN3A_MOUSE	sp|O08576|RUN3A_MOUSE	9	9	8	sp|O08576|RUN3A_MOUSE RUN domain-containing protein 3A OS=Mus musculus OX=10090 GN=Rundc3a PE=1 SV=1	1	9	9	8	0	0	0	3	4	8	0	0	0	3	4	8	0	0	0	3	4	7	23.1	23.1	21.5	50.018	446	446	0	96.697	0	0	0	6.1	12.6	17	531520000	0	0	0	147900000	184050000	199580000	0
sp|O35857|TIM44_MOUSE	sp|O35857|TIM44_MOUSE	12	12	12	sp|O35857|TIM44_MOUSE Mitochondrial import inner membrane translocase subunit TIM44 OS=Mus musculus OX=10090 GN=Timm44 PE=1 SV=2	1	12	12	12	0	0	0	8	7	10	0	0	0	8	7	10	0	0	0	8	7	10	28.5	28.5	28.5	51.091	452	452	0	48.029	0	0	0	22.6	18.1	23.9	548760000	0	0	0	164060000	96289000	288410000	0
sp|Q8K4Q7|CERK1_MOUSE	sp|Q8K4Q7|CERK1_MOUSE	10	10	10	sp|Q8K4Q7|CERK1_MOUSE Ceramide kinase OS=Mus musculus OX=10090 GN=Cerk PE=1 SV=2	1	10	10	10	0	0	0	9	6	7	0	0	0	9	6	7	0	0	0	9	6	7	30.9	30.9	30.9	59.842	531	531	0	124.1	0	0	0	27.9	21.7	21.8	356820000	0	0	0	171830000	112490000	72502000	0
sp|O89116|VTI1A_MOUSE	sp|O89116|VTI1A_MOUSE	7	7	7	sp|O89116|VTI1A_MOUSE Vesicle transport through interaction with t-SNAREs homolog 1A OS=Mus musculus OX=10090 GN=Vti1a PE=1 SV=1	1	7	7	7	0	0	0	4	3	6	0	0	0	4	3	6	0	0	0	4	3	6	43.8	43.8	43.8	24.986	217	217	0	323.31	0	0	0	22.1	12.4	40.1	695510000	0	0	0	306590000	103920000	285000000	0
sp|Q9R0N7|SYT7_MOUSE	sp|Q9R0N7|SYT7_MOUSE	10	10	10	sp|Q9R0N7|SYT7_MOUSE Synaptotagmin-7 OS=Mus musculus OX=10090 GN=Syt7 PE=1 SV=1	1	10	10	10	0	0	0	3	5	8	0	0	0	3	5	8	0	0	0	3	5	8	30.8	30.8	30.8	45.472	403	403	0	24.532	0	0	0	8.4	14.4	27.5	174580000	0	0	0	24165000	35859000	114560000	0
sp|P05532|KIT_MOUSE	sp|P05532|KIT_MOUSE	6	6	6	sp|P05532|KIT_MOUSE Mast/stem cell growth factor receptor Kit OS=Mus musculus OX=10090 GN=Kit PE=1 SV=3	1	6	6	6	0	0	0	4	1	6	0	0	0	4	1	6	0	0	0	4	1	6	7.9	7.9	7.9	109.34	979	979	0	10.344	0	0	0	5.7	1	7.9	31920000	0	0	0	7257200	5741000	18922000	0
sp|Q8VDN2|AT1A1_MOUSE;sp|Q64436|ATP4A_MOUSE	sp|Q8VDN2|AT1A1_MOUSE	30;4	14;0	13;0	sp|Q8VDN2|AT1A1_MOUSE Sodium/potassium-transporting ATPase subunit alpha-1 OS=Mus musculus OX=10090 GN=Atp1a1 PE=1 SV=1	2	30	14	13	9	5	8	28	22	26	1	3	3	12	8	11	1	3	3	11	8	11	32.6	15.2	14.5	112.98	1023	1023;1033	0	262.12	10.9	5.8	11.2	31.7	26.6	30	1043200000	2441000	2790800	4888100	312950000	258960000	461180000	1392900
sp|P11438|LAMP1_MOUSE	sp|P11438|LAMP1_MOUSE	5	5	5	sp|P11438|LAMP1_MOUSE Lysosome-associated membrane glycoprotein 1 OS=Mus musculus OX=10090 GN=Lamp1 PE=1 SV=2	1	5	5	5	0	1	0	3	3	4	0	1	0	3	3	4	0	1	0	3	3	4	14	14	14	43.865	406	406	0	40.372	0	2.7	0	7.6	9.4	12.1	508290000	0	2027600	0	110900000	153460000	241910000	0
sp|Q6P1D5|SE6L1_MOUSE	sp|Q6P1D5|SE6L1_MOUSE	6	6	6	sp|Q6P1D5|SE6L1_MOUSE Seizure 6-like protein OS=Mus musculus OX=10090 GN=Sez6l PE=1 SV=1	1	6	6	6	0	0	0	4	4	4	0	0	0	4	4	4	0	0	0	4	4	4	7.8	7.8	7.8	104.83	963	963	0	142.77	0	0	0	5.3	6	5	155130000	0	0	0	42653000	59429000	53049000	0
sp|Q811Q9|PCY1B_MOUSE	sp|Q811Q9|PCY1B_MOUSE	17	10	10	sp|Q811Q9|PCY1B_MOUSE Choline-phosphate cytidylyltransferase B OS=Mus musculus OX=10090 GN=Pcyt1b PE=1 SV=2	1	17	10	10	2	0	1	10	12	13	0	0	0	3	6	7	0	0	0	3	6	7	53.4	40.1	40.1	41.9	369	369	0	28.949	7	0	4.3	31.7	41.5	43.4	385380000	0	0	0	34799000	97688000	252890000	0
sp|Q9CQA1|TPPC5_MOUSE	sp|Q9CQA1|TPPC5_MOUSE	6	6	6	sp|Q9CQA1|TPPC5_MOUSE Trafficking protein particle complex subunit 5 OS=Mus musculus OX=10090 GN=Trappc5 PE=1 SV=1	1	6	6	6	0	0	1	5	3	4	0	0	1	5	3	4	0	0	1	5	3	4	39.4	39.4	39.4	20.795	188	188	0	67.409	0	0	5.3	35.1	24.5	28.7	318070000	0	0	2443800	104500000	99910000	111220000	0
sp|P46097|SYT2_MOUSE	sp|P46097|SYT2_MOUSE	36	28	28	sp|P46097|SYT2_MOUSE Synaptotagmin-2 OS=Mus musculus OX=10090 GN=Syt2 PE=1 SV=1	1	36	28	28	7	0	4	35	32	33	4	0	2	27	24	25	4	0	2	27	24	25	59.2	49.5	49.5	47.262	422	422	0	323.31	17.3	0	9.7	58.5	58.5	58.5	80070000000	50637000	0	29337000	30091000000	23682000000	26217000000	17785000
sp|Q91WC3|ACSL6_MOUSE	sp|Q91WC3|ACSL6_MOUSE	21	21	21	sp|Q91WC3|ACSL6_MOUSE Long-chain-fatty-acid--CoA ligase 6 OS=Mus musculus OX=10090 GN=Acsl6 PE=1 SV=1	1	21	21	21	4	0	9	11	6	14	4	0	9	11	6	14	4	0	9	11	6	14	35.4	35.4	35.4	78.016	697	697	0	82.75	9	0	17.9	20.8	11.2	25	611360000	29509000	0	39447000	176020000	145260000	221120000	12090000
sp|Q9JKM7|RAB37_MOUSE	sp|Q9JKM7|RAB37_MOUSE	8	7	7	sp|Q9JKM7|RAB37_MOUSE Ras-related protein Rab-37 OS=Mus musculus OX=10090 GN=Rab37 PE=1 SV=2	1	8	7	7	0	0	0	7	7	7	0	0	0	6	6	6	0	0	0	6	6	6	48.4	42.6	42.6	24.656	223	223	0	161.27	0	0	0	43.9	43.9	42.6	668410000	0	0	0	225710000	183300000	259410000	0
sp|P08226|APOE_MOUSE	sp|P08226|APOE_MOUSE	26	26	26	sp|P08226|APOE_MOUSE Apolipoprotein E OS=Mus musculus OX=10090 GN=Apoe PE=1 SV=2	1	26	26	26	14	6	8	23	22	21	14	6	8	23	22	21	14	6	8	23	22	21	71.4	71.4	71.4	35.866	311	311	0	323.31	41.8	24.1	32.8	70.7	69.1	57.2	41872000000	188710000	67070000	169950000	15154000000	12234000000	14059000000	291390000
sp|P98195|ATP9B_MOUSE	sp|P98195|ATP9B_MOUSE	17	13	13	sp|P98195|ATP9B_MOUSE Probable phospholipid-transporting ATPase IIB OS=Mus musculus OX=10090 GN=Atp9b PE=1 SV=4	1	17	13	13	0	0	0	12	8	14	0	0	0	9	7	10	0	0	0	9	7	10	15.5	11.9	11.9	129.02	1146	1146	0	29.005	0	0	0	12	7.9	14	267270000	0	0	0	65241000	105980000	96053000	0
sp|P35278|RAB5C_MOUSE	sp|P35278|RAB5C_MOUSE	11	11	8	sp|P35278|RAB5C_MOUSE Ras-related protein Rab-5C OS=Mus musculus OX=10090 GN=Rab5c PE=1 SV=2	1	11	11	8	8	1	8	10	9	10	8	1	8	10	9	10	5	1	5	7	6	7	74.5	74.5	59.7	23.412	216	216	0	323.31	47.7	6.5	47.7	71.8	58.8	61.6	18119000000	1276600000	0	325810000	7056500000	4562400000	4897600000	170450000
sp|P62821|RAB1A_MOUSE	sp|P62821|RAB1A_MOUSE	16	10	10	sp|P62821|RAB1A_MOUSE Ras-related protein Rab-1A OS=Mus musculus OX=10090 GN=Rab1A PE=1 SV=3	1	16	10	10	9	0	8	15	13	15	4	0	4	9	8	9	4	0	4	9	8	9	79.5	48.8	48.8	22.677	205	205	0	323.31	58.5	0	49.3	79.5	69.3	73.7	16100000000	509710000	0	616180000	3174300000	4688800000	7111400000	364400000
sp|Q99P58|RB27B_MOUSE	sp|Q99P58|RB27B_MOUSE	10	10	9	sp|Q99P58|RB27B_MOUSE Ras-related protein Rab-27B OS=Mus musculus OX=10090 GN=Rab27b PE=1 SV=3	1	10	10	9	0	0	0	8	10	10	0	0	0	8	10	10	0	0	0	7	9	9	50.5	50.5	46.8	24.56	218	218	0	162.25	0	0	0	35.3	50.5	50.5	2836200000	0	0	0	759180000	957950000	1119000000	0
sp|Q62442|VAMP1_MOUSE	sp|Q62442|VAMP1_MOUSE	11	7	7	sp|Q62442|VAMP1_MOUSE Vesicle-associated membrane protein 1 OS=Mus musculus OX=10090 GN=Vamp1 PE=1 SV=1	1	11	7	7	2	2	3	11	10	10	1	1	2	7	6	6	1	1	2	7	6	6	71.2	63.6	63.6	12.89	118	118	0	323.31	20.3	20.3	20.3	71.2	71.2	71.2	30686000000	6899100	3475300	19754000	11117000000	9490100000	10049000000	3429100
sp|Q8BGN8|SYNPR_MOUSE	sp|Q8BGN8|SYNPR_MOUSE	7	7	7	sp|Q8BGN8|SYNPR_MOUSE Synaptoporin OS=Mus musculus OX=10090 GN=Synpr PE=1 SV=1	1	7	7	7	1	0	0	7	7	7	1	0	0	7	7	7	1	0	0	7	7	7	33.6	33.6	33.6	29.228	265	265	0	317.29	3.8	0	0	33.6	33.6	33.6	13314000000	1110800	0	0	2263200000	3843400000	7206700000	972790
sp|P39688|FYN_MOUSE;sp|Q04736|YES_MOUSE	sp|P39688|FYN_MOUSE	10;3	10;3	8;1	sp|P39688|FYN_MOUSE Tyrosine-protein kinase Fyn OS=Mus musculus OX=10090 GN=Fyn PE=1 SV=4	2	10	10	8	1	0	0	6	4	6	1	0	0	6	4	6	0	0	0	5	3	4	23.1	23.1	19.2	60.674	537	537;541	0	33.365	1.9	0	0	12.7	9.7	15.1	341510000	2517400	0	0	94467000	94421000	150110000	1736400
sp|Q91WA3|HDA11_MOUSE	sp|Q91WA3|HDA11_MOUSE	24	24	24	sp|Q91WA3|HDA11_MOUSE Histone deacetylase 11 OS=Mus musculus OX=10090 GN=Hdac11 PE=1 SV=1	1	24	24	24	5	0	0	16	18	23	5	0	0	16	18	23	5	0	0	16	18	23	63.1	63.1	63.1	39.157	347	347	0	323.31	19.9	0	0	54.2	51.9	62.8	7965200000	18656000	0	0	920130000	2738400000	4288100000	17589000
sp|Q8K0P3|MEAK7_MOUSE	sp|Q8K0P3|MEAK7_MOUSE	7	7	7	sp|Q8K0P3|MEAK7_MOUSE MTOR-associated protein MEAK7 OS=Mus musculus OX=10090 GN=Meak7 PE=2 SV=1	1	7	7	7	0	0	0	6	4	6	0	0	0	6	4	6	0	0	0	6	4	6	20.4	20.4	20.4	50.844	455	455	0	159.03	0	0	0	15.6	13	16.9	1786600000	0	0	0	703470000	319550000	763540000	0
sp|Q920I9|WDR7_MOUSE	sp|Q920I9|WDR7_MOUSE	65	65	65	sp|Q920I9|WDR7_MOUSE WD repeat-containing protein 7 OS=Mus musculus OX=10090 GN=Wdr7 PE=1 SV=3	1	65	65	65	21	0	23	60	54	59	21	0	23	60	54	59	21	0	23	60	54	59	49.8	49.8	49.8	163.45	1489	1489	0	323.31	17.9	0	18.5	45.1	43.3	47.5	24432000000	92966000	0	147170000	7825200000	10902000000	5465000000	108950000
sp|Q62443|NPTX1_MOUSE	sp|Q62443|NPTX1_MOUSE	15	15	15	sp|Q62443|NPTX1_MOUSE Neuronal pentraxin-1 OS=Mus musculus OX=10090 GN=Nptx1 PE=1 SV=1	1	15	15	15	0	0	0	10	9	13	0	0	0	10	9	13	0	0	0	10	9	13	33.6	33.6	33.6	47.117	432	432	0	323.31	0	0	0	25.2	23.8	31.7	2492500000	0	0	0	567790000	511540000	1413200000	0
sp|P63321|RALA_MOUSE	sp|P63321|RALA_MOUSE	10	10	4	sp|P63321|RALA_MOUSE Ras-related protein Ral-A OS=Mus musculus OX=10090 GN=Rala PE=1 SV=1	1	10	10	4	2	0	1	10	8	9	2	0	1	10	8	9	1	0	1	4	3	3	57.8	57.8	22.3	23.553	206	206	0	323.31	13.1	0	7.3	57.8	48.1	50.5	13303000000	59467000	0	6857000	6363200000	3029400000	3844500000	3211700
sp|P14094|AT1B1_MOUSE	sp|P14094|AT1B1_MOUSE	14	14	14	sp|P14094|AT1B1_MOUSE Sodium/potassium-transporting ATPase subunit beta-1 OS=Mus musculus OX=10090 GN=Atp1b1 PE=1 SV=1	1	14	14	14	1	0	2	13	13	12	1	0	2	13	13	12	1	0	2	13	13	12	43.8	43.8	43.8	35.194	304	304	0	271.92	3.6	0	8.2	43.4	43.8	35.9	9804800000	4493800	0	15563000	2269700000	2915500000	4599600000	5977500
sp|O54940|BNIP2_MOUSE	sp|O54940|BNIP2_MOUSE	2	1	1	sp|O54940|BNIP2_MOUSE BCL2/adenovirus E1B 19 kDa protein-interacting protein 2 OS=Mus musculus OX=10090 GN=Bnip2 PE=1 SV=2	1	2	1	1	1	0	2	2	2	2	0	0	1	1	1	1	0	0	1	1	1	1	7.7	4	4	37.768	326	326	0	12.698	3.7	0	7.7	7.7	7.7	7.7	187080000	0	0	9104900	29821000	89195000	58956000	0
sp|P62814|VATB2_MOUSE	sp|P62814|VATB2_MOUSE	52	52	52	sp|P62814|VATB2_MOUSE V-type proton ATPase subunit B, brain isoform OS=Mus musculus OX=10090 GN=Atp6v1b2 PE=1 SV=1	1	52	52	52	15	1	7	50	43	46	15	1	7	50	43	46	15	1	7	50	43	46	94.1	94.1	94.1	56.55	511	511	0	323.31	45.4	3.9	22.1	93.2	90	92.6	537480000000	464160000	44935000	289470000	204060000000	136330000000	196300000000	89899000
sp|Q8BLF1|NCEH1_MOUSE	sp|Q8BLF1|NCEH1_MOUSE	7	7	7	sp|Q8BLF1|NCEH1_MOUSE Neutral cholesterol ester hydrolase 1 OS=Mus musculus OX=10090 GN=Nceh1 PE=1 SV=1	1	7	7	7	0	0	0	2	4	7	0	0	0	2	4	7	0	0	0	2	4	7	22.5	22.5	22.5	45.739	408	408	0	45.951	0	0	0	10.8	16.4	22.5	437050000	0	0	0	88584000	160480000	187990000	0
sp|Q03137|EPHA4_MOUSE;sp|P29319|EPHA3_MOUSE;sp|Q8CBF3|EPHB1_MOUSE;sp|P54754|EPHB3_MOUSE	sp|Q03137|EPHA4_MOUSE	10;1;1;1	10;1;1;1	8;0;0;0	sp|Q03137|EPHA4_MOUSE Ephrin type-A receptor 4 OS=Mus musculus OX=10090 GN=Epha4 PE=1 SV=2	4	10	10	8	0	0	0	4	6	9	0	0	0	4	6	9	0	0	0	3	5	7	14.3	14.3	12	109.81	986	986;983;984;993	0	149.83	0	0	0	4.9	10	13.3	245290000	0	0	0	50035000	102110000	93140000	0
sp|Q69ZF3|GBA2_MOUSE	sp|Q69ZF3|GBA2_MOUSE	24	24	24	sp|Q69ZF3|GBA2_MOUSE Non-lysosomal glucosylceramidase OS=Mus musculus OX=10090 GN=Gba2 PE=1 SV=2	1	24	24	24	0	0	0	10	17	19	0	0	0	10	17	19	0	0	0	10	17	19	35.5	35.5	35.5	103.29	918	918	0	227.94	0	0	0	15.1	26.3	27	886420000	0	0	0	123580000	422160000	340680000	0
sp|Q9WUC3|LY6H_MOUSE	sp|Q9WUC3|LY6H_MOUSE	4	4	4	sp|Q9WUC3|LY6H_MOUSE Lymphocyte antigen 6H OS=Mus musculus OX=10090 GN=Ly6h PE=1 SV=2	1	4	4	4	0	0	0	2	3	4	0	0	0	2	3	4	0	0	0	2	3	4	29.5	29.5	29.5	14.669	139	139	0	59.992	0	0	0	16.5	29.5	29.5	643760000	0	0	0	22490000	262790000	358480000	0
sp|Q9DB75|CDIP1_MOUSE	sp|Q9DB75|CDIP1_MOUSE	2	2	2	sp|Q9DB75|CDIP1_MOUSE Cell death-inducing p53-target protein 1 OS=Mus musculus OX=10090 GN=Cdip1 PE=2 SV=1	1	2	2	2	0	0	0	2	2	2	0	0	0	2	2	2	0	0	0	2	2	2	13.9	13.9	13.9	21.835	208	208	0	38.832	0	0	0	13.9	13.9	13.9	1230100000	0	0	0	346680000	411680000	471700000	0
sp|Q9ERN0|SCAM2_MOUSE	sp|Q9ERN0|SCAM2_MOUSE	2	2	2	sp|Q9ERN0|SCAM2_MOUSE Secretory carrier-associated membrane protein 2 OS=Mus musculus OX=10090 GN=Scamp2 PE=1 SV=1	1	2	2	2	0	0	0	1	2	2	0	0	0	1	2	2	0	0	0	1	2	2	9.7	9.7	9.7	36.464	329	329	0	323.31	0	0	0	3.6	9.7	9.7	161060000	0	0	0	3373600	66328000	91355000	0
sp|Q8BG92|CLVS2_MOUSE	sp|Q8BG92|CLVS2_MOUSE	19	17	17	sp|Q8BG92|CLVS2_MOUSE Clavesin-2 OS=Mus musculus OX=10090 GN=Clvs2 PE=1 SV=1	1	19	17	17	5	0	4	12	12	19	4	0	2	10	10	17	4	0	2	10	10	17	49.8	43.4	43.4	37.954	327	327	0	260.11	19	0	13.5	37	36.7	49.8	3813300000	14737000	0	3765200	913010000	796380000	2085400000	13073000
sp|Q9ERI2|RB27A_MOUSE	sp|Q9ERI2|RB27A_MOUSE	6	5	5	sp|Q9ERI2|RB27A_MOUSE Ras-related protein Rab-27A OS=Mus musculus OX=10090 GN=Rab27a PE=1 SV=1	1	6	5	5	0	0	0	6	6	5	0	0	0	5	5	4	0	0	0	5	5	4	25.8	22.2	22.2	25.017	221	221	0	37.158	0	0	0	25.8	25.8	25.8	357880000	0	0	0	99187000	113590000	145110000	0
sp|Q9QZI8|SERC1_MOUSE	sp|Q9QZI8|SERC1_MOUSE	6	6	5	sp|Q9QZI8|SERC1_MOUSE Serine incorporator 1 OS=Mus musculus OX=10090 GN=Serinc1 PE=1 SV=1	1	6	6	5	0	0	0	1	6	4	0	0	0	1	6	4	0	0	0	1	5	3	15.7	15.7	13.2	50.508	453	453	0	17.567	0	0	0	2.6	15.7	11.7	151430000	0	0	0	13858000	91678000	45896000	0
sp|Q99J85|NPTXR_MOUSE	sp|Q99J85|NPTXR_MOUSE	12	12	12	sp|Q99J85|NPTXR_MOUSE Neuronal pentraxin receptor OS=Mus musculus OX=10090 GN=Nptxr PE=1 SV=1	1	12	12	12	0	0	0	7	9	12	0	0	0	7	9	12	0	0	0	7	9	12	34.9	34.9	34.9	52.284	493	493	0	167.02	0	0	0	21.3	28.6	34.9	1260900000	0	0	0	202440000	261700000	796800000	0
sp|Q3TWL2|PP4P1_MOUSE	sp|Q3TWL2|PP4P1_MOUSE	6	5	5	sp|Q3TWL2|PP4P1_MOUSE Type 1 phosphatidylinositol 4,5-bisphosphate 4-phosphatase OS=Mus musculus OX=10090 GN=Pip4p1 PE=1 SV=1	1	6	5	5	0	0	0	5	3	3	0	0	0	4	3	3	0	0	0	4	3	3	25.4	21.8	21.8	30.047	284	284	0	41.04	0	0	0	22.2	14.8	15.5	335890000	0	0	0	51836000	72732000	211320000	0
sp|Q9D9E0|S22AH_MOUSE	sp|Q9D9E0|S22AH_MOUSE	4	4	4	sp|Q9D9E0|S22AH_MOUSE Solute carrier family 22 member 17 OS=Mus musculus OX=10090 GN=Slc22a17 PE=2 SV=2	1	4	4	4	0	0	0	2	3	3	0	0	0	2	3	3	0	0	0	2	3	3	10.5	10.5	10.5	43.195	401	401	0	13.839	0	0	0	6.5	8.7	8.2	243720000	0	0	0	42511000	62017000	139200000	0
sp|Q8R361|RFIP5_MOUSE	sp|Q8R361|RFIP5_MOUSE	19	19	19	sp|Q8R361|RFIP5_MOUSE Rab11 family-interacting protein 5 OS=Mus musculus OX=10090 GN=Rab11fip5 PE=1 SV=2	1	19	19	19	1	0	5	14	11	15	1	0	5	14	11	15	1	0	5	14	11	15	39.8	39.8	39.8	69.552	645	645	0	92.795	1.6	0	11.3	35.5	23.1	29.6	554130000	4679400	0	19405000	111200000	165710000	253140000	2422400
sp|Q8CIP5|DISP2_MOUSE	sp|Q8CIP5|DISP2_MOUSE	5	5	5	sp|Q8CIP5|DISP2_MOUSE Protein dispatched homolog 2 OS=Mus musculus OX=10090 GN=Disp2 PE=1 SV=1	1	5	5	5	0	0	0	2	3	5	0	0	0	2	3	5	0	0	0	2	3	5	5.8	5.8	5.8	147.94	1345	1345	0	18.753	0	0	0	1.7	3.1	5.8	85928000	0	0	0	10736000	33771000	41421000	0
sp|P68181|KAPCB_MOUSE	sp|P68181|KAPCB_MOUSE	20	20	7	sp|P68181|KAPCB_MOUSE cAMP-dependent protein kinase catalytic subunit beta OS=Mus musculus OX=10090 GN=Prkacb PE=1 SV=2	1	20	20	7	8	1	3	13	15	17	8	1	3	13	15	17	3	1	1	5	5	6	47	47	21.9	40.707	351	351	0	258.98	20.8	3.4	8.8	34.2	39	38.5	4400600000	112810000	4676900	42463000	741330000	1523200000	1976100000	103470000
sp|P12849|KAP1_MOUSE	sp|P12849|KAP1_MOUSE	5	4	4	sp|P12849|KAP1_MOUSE cAMP-dependent protein kinase type I-beta regulatory subunit OS=Mus musculus OX=10090 GN=Prkar1b PE=1 SV=2	1	5	4	4	1	0	0	2	3	5	1	0	0	2	2	4	1	0	0	2	2	4	18.4	15.2	15.2	43.224	381	381	0	10.557	2.9	0	0	9.2	10.8	18.4	186040000	0	0	0	36583000	67362000	82098000	0
sp|P61027|RAB10_MOUSE	sp|P61027|RAB10_MOUSE	14	13	13	sp|P61027|RAB10_MOUSE Ras-related protein Rab-10 OS=Mus musculus OX=10090 GN=Rab10 PE=1 SV=1	1	14	13	13	7	1	7	11	12	11	6	1	6	10	11	10	6	1	6	10	11	10	57	51.5	51.5	22.541	200	200	0	323.31	36	5.5	39.5	53.5	49	49	13655000000	1042100000	3686100	716240000	2193900000	5387000000	4312000000	242860000
sp|P51150|RAB7A_MOUSE	sp|P51150|RAB7A_MOUSE	18	18	18	sp|P51150|RAB7A_MOUSE Ras-related protein Rab-7a OS=Mus musculus OX=10090 GN=Rab7a PE=1 SV=2	1	18	18	18	11	3	10	17	14	16	11	3	10	17	14	16	11	3	10	17	14	16	80.2	80.2	80.2	23.489	207	207	0	323.31	61.8	18.8	65.7	78.7	74.4	79.7	24851000000	1322200000	7068800	1183900000	5000900000	8558400000	8778600000	379570000
sp|Q8K097|LFG2_MOUSE	sp|Q8K097|LFG2_MOUSE	2	2	2	sp|Q8K097|LFG2_MOUSE Protein lifeguard 2 OS=Mus musculus OX=10090 GN=Faim2 PE=2 SV=1	1	2	2	2	0	0	0	1	2	2	0	0	0	1	2	2	0	0	0	1	2	2	7.3	7.3	7.3	35.257	317	317	0	36.007	0	0	0	6.9	7.3	7.3	364950000	0	0	0	34781000	143740000	186430000	0
sp|P61294|RAB6B_MOUSE	sp|P61294|RAB6B_MOUSE	15	15	5	sp|P61294|RAB6B_MOUSE Ras-related protein Rab-6B OS=Mus musculus OX=10090 GN=Rab6b PE=1 SV=1	1	15	15	5	11	0	8	13	12	14	11	0	8	13	12	14	4	0	2	4	4	4	66.8	66.8	28.8	23.461	208	208	0	323.31	57.2	0	36.5	52.9	61.5	66.8	30026000000	381990000	0	1629700000	6200200000	9371000000	12443000000	534830000
sp|O35474|EDIL3_MOUSE	sp|O35474|EDIL3_MOUSE	7	7	7	sp|O35474|EDIL3_MOUSE EGF-like repeat and discoidin I-like domain-containing protein 3 OS=Mus musculus OX=10090 GN=Edil3 PE=1 SV=2	1	7	7	7	0	0	0	6	2	1	0	0	0	6	2	1	0	0	0	6	2	1	19.2	19.2	19.2	53.711	480	480	0	11.99	0	0	0	16.7	4.6	2.1	68553000	0	0	0	25412000	23976000	19165000	0
sp|P46638|RB11B_MOUSE;sp|Q9WTL2|RAB25_MOUSE	sp|P46638|RB11B_MOUSE	17;1	17;1	5;0	sp|P46638|RB11B_MOUSE Ras-related protein Rab-11B OS=Mus musculus OX=10090 GN=Rab11b PE=1 SV=3	2	17	17	5	10	0	8	16	14	13	10	0	8	16	14	13	1	0	2	4	3	2	72.9	72.9	25.7	24.489	218	218;213	0	323.31	54.1	0	42.2	72.9	59.2	60.6	31029000000	1180200000	0	621500000	8448900000	9241600000	11537000000	185720000
sp|Q8R1Y2|MERB1_MOUSE	sp|Q8R1Y2|MERB1_MOUSE	11	11	11	sp|Q8R1Y2|MERB1_MOUSE bMERB domain-containing protein 1 OS=Mus musculus OX=10090 GN=Bmerb1 PE=1 SV=1	1	11	11	11	0	0	0	9	6	5	0	0	0	9	6	5	0	0	0	9	6	5	53.7	53.7	53.7	23.465	203	203	0	41.211	0	0	0	45.3	35.5	27.1	648140000	0	0	0	274200000	158080000	215860000	0
sp|P47754|CAZA2_MOUSE	sp|P47754|CAZA2_MOUSE	17	17	15	sp|P47754|CAZA2_MOUSE F-actin-capping protein subunit alpha-2 OS=Mus musculus OX=10090 GN=Capza2 PE=1 SV=3	1	17	17	15	9	2	10	11	14	16	9	2	10	11	14	16	8	2	9	10	12	14	78	78	68.5	32.967	286	286	0	323.31	50.7	10.1	57	53.5	67.8	74.8	7475400000	153750000	10143000	333080000	940950000	2437400000	3600100000	129330000
sp|Q96DY5|RN112_MOUSE	sp|Q96DY5|RN112_MOUSE	10	10	10	sp|Q96DY5|RN112_MOUSE RING finger protein 112 OS=Mus musculus OX=10090 GN=Rnf112 PE=1 SV=1	1	10	10	10	1	0	2	4	5	4	1	0	2	4	5	4	1	0	2	4	5	4	21.7	21.7	21.7	71.274	654	654	0	32.136	2.3	0	4.1	9	11.5	7.6	227310000	0	0	6964400	44126000	116010000	60206000	0
sp|P59279|RAB2B_MOUSE	sp|P59279|RAB2B_MOUSE	17	8	8	sp|P59279|RAB2B_MOUSE Ras-related protein Rab-2B OS=Mus musculus OX=10090 GN=Rab2b PE=1 SV=1	1	17	8	8	7	1	6	13	14	16	0	0	0	5	6	8	0	0	0	5	6	8	72.2	37	37	24.198	216	216	0	140.04	31.9	6	28.2	69.9	66.7	72.2	904730000	0	0	0	153930000	299320000	451480000	0
sp|P59644|PI5PA_MOUSE	sp|P59644|PI5PA_MOUSE	23	23	23	sp|P59644|PI5PA_MOUSE Phosphatidylinositol 4,5-bisphosphate 5-phosphatase A OS=Mus musculus OX=10090 GN=Inpp5j PE=1 SV=2	1	23	23	23	6	0	11	15	18	14	6	0	11	15	18	14	6	0	11	15	18	14	31.6	31.6	31.6	107.54	1003	1003	0	177.13	8.4	0	17.3	23.2	25.2	21.8	698180000	14973000	0	47376000	114240000	381870000	139710000	7597300
sp|Q9CPW0|CNTP2_MOUSE	sp|Q9CPW0|CNTP2_MOUSE	13	13	13	sp|Q9CPW0|CNTP2_MOUSE Contactin-associated protein-like 2 OS=Mus musculus OX=10090 GN=Cntnap2 PE=1 SV=2	1	13	13	13	0	0	0	9	5	5	0	0	0	9	5	5	0	0	0	9	5	5	14.3	14.3	14.3	148.2	1332	1332	0	56.4	0	0	0	9.8	4.6	5.4	115300000	0	0	0	44862000	47072000	23363000	0
sp|Q9CZT8|RAB3B_MOUSE;sp|Q8CG50|RAB43_MOUSE	sp|Q9CZT8|RAB3B_MOUSE	10;1	8;0	8;0	sp|Q9CZT8|RAB3B_MOUSE Ras-related protein Rab-3B OS=Mus musculus OX=10090 GN=Rab3b PE=1 SV=1	2	10	8	8	2	0	3	9	6	9	1	0	2	7	4	7	1	0	2	7	4	7	47	37.4	37.4	24.757	219	219;210	0	316.55	11	0	19.6	47	33.3	43.8	4415700000	6963200	0	180100000	1192900000	1105400000	1930400000	1532400
sp|Q920N7|SYT12_MOUSE	sp|Q920N7|SYT12_MOUSE	26	26	26	sp|Q920N7|SYT12_MOUSE Synaptotagmin-12 OS=Mus musculus OX=10090 GN=Syt12 PE=1 SV=1	1	26	26	26	0	0	0	20	22	23	0	0	0	20	22	23	0	0	0	20	22	23	64.6	64.6	64.6	46.68	421	421	0	323.31	0	0	0	58.2	59.6	62	17444000000	0	0	0	4037900000	5509200000	7896500000	0
sp|Q9WV80|SNX1_MOUSE	sp|Q9WV80|SNX1_MOUSE	20	20	18	sp|Q9WV80|SNX1_MOUSE Sorting nexin-1 OS=Mus musculus OX=10090 GN=Snx1 PE=1 SV=1	1	20	20	18	7	0	6	18	10	15	7	0	6	18	10	15	7	0	5	16	10	13	41.4	41.4	37.4	58.951	522	522	0	202.45	16.5	0	14.4	39.1	20.5	32.2	1554400000	45678000	0	46144000	588470000	308390000	565750000	30321000
sp|Q06335|APLP2_MOUSE	sp|Q06335|APLP2_MOUSE	7	6	6	sp|Q06335|APLP2_MOUSE Amyloid-like protein 2 OS=Mus musculus OX=10090 GN=Aplp2 PE=1 SV=4	1	7	6	6	0	0	0	5	4	5	0	0	0	4	3	4	0	0	0	4	3	4	11.6	10.5	10.5	80.466	707	707	0	12.126	0	0	0	7.8	7.1	8.5	100240000	0	0	0	20939000	25412000	53890000	0
sp|Q8BFT9|SVOP_MOUSE	sp|Q8BFT9|SVOP_MOUSE	7	7	7	sp|Q8BFT9|SVOP_MOUSE Synaptic vesicle 2-related protein OS=Mus musculus OX=10090 GN=Svop PE=1 SV=1	1	7	7	7	0	0	0	4	5	5	0	0	0	4	5	5	0	0	0	4	5	5	15.9	15.9	15.9	60.768	548	548	0	115.77	0	0	0	10.2	11.3	10.2	538910000	0	0	0	155900000	194070000	188940000	0
sp|Q8BLV3|SL9A7_MOUSE	sp|Q8BLV3|SL9A7_MOUSE	6	6	6	sp|Q8BLV3|SL9A7_MOUSE Sodium/hydrogen exchanger 7 OS=Mus musculus OX=10090 GN=Slc9a7 PE=1 SV=1	1	6	6	6	0	0	0	5	4	4	0	0	0	5	4	4	0	0	0	5	4	4	9.1	9.1	9.1	80.289	726	726	0	33.957	0	0	0	7	6.6	6.6	478300000	0	0	0	139540000	134180000	204580000	0
sp|Q9DB72|BTBDH_MOUSE	sp|Q9DB72|BTBDH_MOUSE	20	20	20	sp|Q9DB72|BTBDH_MOUSE BTB/POZ domain-containing protein 17 OS=Mus musculus OX=10090 GN=Btbd17 PE=1 SV=1	1	20	20	20	2	6	2	17	18	19	2	6	2	17	18	19	2	6	2	17	18	19	56.5	56.5	56.5	52.602	478	478	0	323.31	6.1	18.2	6.1	53.3	49.4	55	24633000000	11037000	281770000	24527000	7623300000	6649500000	10043000000	2001200
sp|Q8BR63|F177A_MOUSE	sp|Q8BR63|F177A_MOUSE	6	6	6	sp|Q8BR63|F177A_MOUSE Protein FAM177A1 OS=Mus musculus OX=10090 GN=Fam177a1 PE=1 SV=1	1	6	6	6	0	0	0	3	4	5	0	0	0	3	4	5	0	0	0	3	4	5	37.2	37.2	37.2	23.578	207	207	0	67.866	0	0	0	21.3	22.2	30	306710000	0	0	0	45380000	85045000	176290000	0
sp|Q3UR50|VW5B2_MOUSE	sp|Q3UR50|VW5B2_MOUSE	7	7	7	sp|Q3UR50|VW5B2_MOUSE von Willebrand factor A domain-containing protein 5B2 OS=Mus musculus OX=10090 GN=Vwa5b2 PE=2 SV=2	1	7	7	7	0	0	0	2	2	6	0	0	0	2	2	6	0	0	0	2	2	6	6.6	6.6	6.6	133.41	1248	1248	0	13.841	0	0	0	1.5	2.5	5	40609000	0	0	0	3259700	18002000	19348000	0
sp|Q6NVF0|OCRL_MOUSE	sp|Q6NVF0|OCRL_MOUSE	15	15	15	sp|Q6NVF0|OCRL_MOUSE Inositol polyphosphate 5-phosphatase OCRL OS=Mus musculus OX=10090 GN=Ocrl PE=1 SV=1	1	15	15	15	0	0	0	5	7	9	0	0	0	5	7	9	0	0	0	5	7	9	19.6	19.6	19.6	104.28	900	900	0	29.698	0	0	0	6.2	9.7	13	192660000	0	0	0	26592000	96861000	69202000	0
sp|P50516|VATA_MOUSE	sp|P50516|VATA_MOUSE	67	67	67	sp|P50516|VATA_MOUSE V-type proton ATPase catalytic subunit A OS=Mus musculus OX=10090 GN=Atp6v1a PE=1 SV=2	1	67	67	67	18	9	14	61	55	58	18	9	14	61	55	58	18	9	14	61	55	58	97.2	97.2	97.2	68.325	617	617	0	323.31	40	19.8	31.6	95.9	86.1	87.2	595610000000	565010000	82954000	286310000	248170000000	142160000000	204350000000	176480000
sp|Q03157|APLP1_MOUSE	sp|Q03157|APLP1_MOUSE	4	4	4	sp|Q03157|APLP1_MOUSE Amyloid-like protein 1 OS=Mus musculus OX=10090 GN=Aplp1 PE=1 SV=1	1	4	4	4	1	0	0	2	3	3	1	0	0	2	3	3	1	0	0	2	3	3	8.1	8.1	8.1	72.75	653	653	0	8.8191	1.8	0	0	3.4	6.3	6.6	59921000	813680	0	0	8148700	22936000	28022000	1012700
sp|Q8VHQ9|ACO11_MOUSE	sp|Q8VHQ9|ACO11_MOUSE	43	43	43	sp|Q8VHQ9|ACO11_MOUSE Acyl-coenzyme A thioesterase 11 OS=Mus musculus OX=10090 GN=Acot11 PE=1 SV=1	1	43	43	43	23	6	15	42	25	30	23	6	15	42	25	30	23	6	15	42	25	30	72.9	72.9	72.9	67.354	594	594	0	323.31	32.3	10.4	28.1	71.4	50.3	56.2	30393000000	1048600000	42151000	424580000	10609000000	6417900000	11851000000	474750000
sp|Q9CZV8|FXL20_MOUSE	sp|Q9CZV8|FXL20_MOUSE	5	5	4	sp|Q9CZV8|FXL20_MOUSE F-box/LRR-repeat protein 20 OS=Mus musculus OX=10090 GN=Fbxl20 PE=1 SV=3	1	5	5	4	0	0	0	2	3	4	0	0	0	2	3	4	0	0	0	2	3	3	13.3	13.3	10.8	48.396	436	436	0	15.406	0	0	0	4.4	7.6	10.1	100170000	0	0	0	17835000	35124000	47208000	0
sp|Q8CGK7|GNAL_MOUSE	sp|Q8CGK7|GNAL_MOUSE	5	4	4	sp|Q8CGK7|GNAL_MOUSE Guanine nucleotide-binding protein G(olf) subunit alpha OS=Mus musculus OX=10090 GN=Gnal PE=1 SV=1	1	5	4	4	0	1	0	3	2	5	0	0	0	2	1	4	0	0	0	2	1	4	18.6	15.7	15.7	44.308	381	381	0	13.528	0	2.9	0	10.5	5.5	18.6	79371000	0	0	0	23514000	8152900	47704000	0
sp|Q8K596|NAC2_MOUSE	sp|Q8K596|NAC2_MOUSE	7	7	7	sp|Q8K596|NAC2_MOUSE Sodium/calcium exchanger 2 OS=Mus musculus OX=10090 GN=Slc8a2 PE=1 SV=1	1	7	7	7	0	0	0	6	2	5	0	0	0	6	2	5	0	0	0	6	2	5	8.9	8.9	8.9	100.71	921	921	0	31.78	0	0	0	8.8	2.4	4.7	72717000	0	0	0	24972000	8158900	39585000	0
sp|Q9WVK8|CP46A_MOUSE	sp|Q9WVK8|CP46A_MOUSE	13	13	13	sp|Q9WVK8|CP46A_MOUSE Cholesterol 24-hydroxylase OS=Mus musculus OX=10090 GN=Cyp46a1 PE=1 SV=1	1	13	13	13	0	0	1	6	6	9	0	0	1	6	6	9	0	0	1	6	6	9	28	28	28	56.813	500	500	0	63.494	0	0	1.8	13.8	12.2	17.8	236600000	0	0	0	61423000	54214000	120970000	0
sp|Q9D8U8|SNX5_MOUSE	sp|Q9D8U8|SNX5_MOUSE	8	8	8	sp|Q9D8U8|SNX5_MOUSE Sorting nexin-5 OS=Mus musculus OX=10090 GN=Snx5 PE=1 SV=1	1	8	8	8	1	0	1	4	7	6	1	0	1	4	7	6	1	0	1	4	7	6	23.8	23.8	23.8	46.797	404	404	0	94.177	3.7	0	3.7	12.9	20.3	18.8	691690000	0	0	8584400	137950000	229260000	315900000	0
sp|Q99LJ7|RCBT2_MOUSE	sp|Q99LJ7|RCBT2_MOUSE	8	7	7	sp|Q99LJ7|RCBT2_MOUSE RCC1 and BTB domain-containing protein 2 OS=Mus musculus OX=10090 GN=Rcbtb2 PE=1 SV=1	1	8	7	7	0	0	0	5	5	8	0	0	0	5	4	7	0	0	0	5	4	7	19.8	17.4	17.4	60.163	551	551	0	34.23	0	0	0	11.6	11.1	19.8	747890000	0	0	0	89273000	333270000	325340000	0
sp|Q8BGY9|SC5A7_MOUSE	sp|Q8BGY9|SC5A7_MOUSE	6	6	6	sp|Q8BGY9|SC5A7_MOUSE High affinity choline transporter 1 OS=Mus musculus OX=10090 GN=Slc5a7 PE=1 SV=1	1	6	6	6	0	0	0	1	4	4	0	0	0	1	4	4	0	0	0	1	4	4	12.9	12.9	12.9	63.364	580	580	0	20.108	0	0	0	1.7	6.7	10	207880000	0	0	0	19324000	71042000	117510000	0
sp|Q6NXM2|RCBT1_MOUSE	sp|Q6NXM2|RCBT1_MOUSE	10	10	9	sp|Q6NXM2|RCBT1_MOUSE RCC1 and BTB domain-containing protein 1 OS=Mus musculus OX=10090 GN=Rcbtb1 PE=1 SV=1	1	10	10	9	0	0	0	5	7	8	0	0	0	5	7	8	0	0	0	5	6	7	20.9	20.9	18.5	58.379	531	531	0	146.79	0	0	0	14.1	18.1	18.5	914010000	0	0	0	143790000	397350000	372870000	0
sp|Q68FD5|CLH1_MOUSE	sp|Q68FD5|CLH1_MOUSE	107	107	107	sp|Q68FD5|CLH1_MOUSE Clathrin heavy chain 1 OS=Mus musculus OX=10090 GN=Cltc PE=1 SV=3	1	107	107	107	45	12	38	87	90	94	45	12	38	87	90	94	45	12	38	87	90	94	62	62	62	191.55	1675	1675	0	323.31	29.1	9.4	24.9	51.5	55.8	56.3	37846000000	599270000	46508000	448260000	6474300000	14498000000	15780000000	556060000
sp|Q9WTR5|CAD13_MOUSE	sp|Q9WTR5|CAD13_MOUSE	6	6	6	sp|Q9WTR5|CAD13_MOUSE Cadherin-13 OS=Mus musculus OX=10090 GN=Cdh13 PE=1 SV=2	1	6	6	6	1	0	1	4	3	6	1	0	1	4	3	6	1	0	1	4	3	6	12.7	12.7	12.7	78.185	714	714	0	68.576	1.7	0	2	8	4.9	12.7	607110000	1412700	0	1189100	167080000	104740000	332680000	546480
sp|Q8K021|SCAM1_MOUSE	sp|Q8K021|SCAM1_MOUSE	12	12	12	sp|Q8K021|SCAM1_MOUSE Secretory carrier-associated membrane protein 1 OS=Mus musculus OX=10090 GN=Scamp1 PE=1 SV=1	1	12	12	12	3	1	5	9	11	12	3	1	5	9	11	12	3	1	5	9	11	12	41.4	41.4	41.4	38.028	338	338	0	323.31	14.8	8	26.6	35.8	37.9	41.4	60233000000	20778000	8378500	64284000	4705200000	21596000000	33838000000	12514000
sp|Q9JKK1|STX6_MOUSE	sp|Q9JKK1|STX6_MOUSE	13	13	13	sp|Q9JKK1|STX6_MOUSE Syntaxin-6 OS=Mus musculus OX=10090 GN=Stx6 PE=1 SV=1	1	13	13	13	0	1	1	9	10	13	0	1	1	9	10	13	0	1	1	9	10	13	48.2	48.2	48.2	28.996	255	255	0	323.31	0	4.3	4.3	41.6	46.3	48.2	1831300000	0	0	1983900	224850000	435770000	1168700000	0
sp|P84096|RHOG_MOUSE	sp|P84096|RHOG_MOUSE	10	9	9	sp|P84096|RHOG_MOUSE Rho-related GTP-binding protein RhoG OS=Mus musculus OX=10090 GN=Rhog PE=1 SV=1	1	10	9	9	4	1	3	6	8	9	3	1	2	5	7	8	3	1	2	5	7	8	59.2	53.4	53.4	21.308	191	191	0	240.05	32.5	9.9	25.7	46.6	59.2	51.8	656640000	8513800	5025400	13239000	119300000	253630000	256930000	9497400
sp|Q60930|VDAC2_MOUSE	sp|Q60930|VDAC2_MOUSE	5	5	5	sp|Q60930|VDAC2_MOUSE Voltage-dependent anion-selective channel protein 2 OS=Mus musculus OX=10090 GN=Vdac2 PE=1 SV=2	1	5	5	5	1	1	3	1	3	3	1	1	3	1	3	3	1	1	3	1	3	3	21.4	21.4	21.4	31.732	295	295	0	11.611	4.4	4.1	14.2	6.8	14.2	12.9	80699000	1444600	0	4334100	15771000	35126000	24024000	0
sp|Q6P9K9|NRX3A_MOUSE;sp|Q8C985|NRX3B_MOUSE	sp|Q6P9K9|NRX3A_MOUSE	26;6	26;6	22;6	sp|Q6P9K9|NRX3A_MOUSE Neurexin-3 OS=Mus musculus OX=10090 GN=Nrxn3 PE=1 SV=2	2	26	26	22	2	0	2	22	14	15	2	0	2	22	14	15	1	0	2	20	12	13	20.6	20.6	18.2	173.43	1571	1571;567	0	79.768	1.3	0	1.8	18	12.4	12.1	496980000	1019300	0	1884600	157780000	213520000	122780000	876810
sp|Q9EQG7|ENPP5_MOUSE	sp|Q9EQG7|ENPP5_MOUSE	6	6	6	sp|Q9EQG7|ENPP5_MOUSE Ectonucleotide pyrophosphatase/phosphodiesterase family member 5 OS=Mus musculus OX=10090 GN=Enpp5 PE=1 SV=3	1	6	6	6	0	0	0	3	3	5	0	0	0	3	3	5	0	0	0	3	3	5	15.1	15.1	15.1	54.386	477	477	0	66.582	0	0	0	9	6.7	10.9	274630000	0	0	0	37893000	94359000	142380000	0
sp|O70439|STX7_MOUSE	sp|O70439|STX7_MOUSE	10	10	10	sp|O70439|STX7_MOUSE Syntaxin-7 OS=Mus musculus OX=10090 GN=Stx7 PE=1 SV=3	1	10	10	10	0	0	0	9	9	10	0	0	0	9	9	10	0	0	0	9	9	10	45.2	45.2	45.2	29.82	261	261	0	323.31	0	0	0	44.4	44.4	45.2	3522000000	0	0	0	506950000	1208900000	1806200000	0
sp|Q07113|MPRI_MOUSE	sp|Q07113|MPRI_MOUSE	34	34	34	sp|Q07113|MPRI_MOUSE Cation-independent mannose-6-phosphate receptor OS=Mus musculus OX=10090 GN=Igf2r PE=1 SV=1	1	34	34	34	0	0	0	18	13	27	0	0	0	18	13	27	0	0	0	18	13	27	17.2	17.2	17.2	273.81	2483	2483	0	105.43	0	0	0	9	6.4	13.4	495550000	0	0	0	76405000	156250000	262900000	0
sp|O88741|GDAP1_MOUSE	sp|O88741|GDAP1_MOUSE	5	5	5	sp|O88741|GDAP1_MOUSE Ganglioside-induced differentiation-associated protein 1 OS=Mus musculus OX=10090 GN=Gdap1 PE=1 SV=1	1	5	5	5	0	0	0	2	3	5	0	0	0	2	3	5	0	0	0	2	3	5	16.2	16.2	16.2	41.31	358	358	0	80.485	0	0	0	7.3	11.7	16.2	102420000	0	0	0	9494600	31119000	61810000	0
sp|P70663|SPRL1_MOUSE	sp|P70663|SPRL1_MOUSE	6	6	6	sp|P70663|SPRL1_MOUSE SPARC-like protein 1 OS=Mus musculus OX=10090 GN=Sparcl1 PE=1 SV=3	1	6	6	6	2	0	1	5	3	4	2	0	1	5	3	4	2	0	1	5	3	4	11.8	11.8	11.8	72.286	650	650	0	13.323	3.7	0	2	9.4	4.8	7.2	119210000	5273300	0	4651200	38533000	31949000	38807000	1885800
sp|Q9Z1S3|GRP1_MOUSE	sp|Q9Z1S3|GRP1_MOUSE	34	34	34	sp|Q9Z1S3|GRP1_MOUSE RAS guanyl-releasing protein 1 OS=Mus musculus OX=10090 GN=Rasgrp1 PE=1 SV=1	1	34	34	34	11	0	4	21	18	28	11	0	4	21	18	28	11	0	4	21	18	28	60.4	60.4	60.4	90.303	795	795	0	323.31	22.5	0	9.4	43.3	35.6	49.9	4039300000	107820000	0	36991000	859650000	963060000	2071800000	46556000
sp|Q9D4C9|CLVS1_MOUSE	sp|Q9D4C9|CLVS1_MOUSE	22	22	20	sp|Q9D4C9|CLVS1_MOUSE Clavesin-1 OS=Mus musculus OX=10090 GN=Clvs1 PE=1 SV=1	1	22	22	20	3	0	5	15	14	20	3	0	5	15	14	20	2	0	3	13	12	18	61.3	61.3	55.4	40.613	354	354	0	323.31	9.9	0	15.8	40.1	39.8	61	7601100000	34819000	0	45873000	1700400000	1382900000	4437200000	34333000
sp|Q9Z1L5|CA2D3_MOUSE	sp|Q9Z1L5|CA2D3_MOUSE	7	7	7	sp|Q9Z1L5|CA2D3_MOUSE Voltage-dependent calcium channel subunit alpha-2/delta-3 OS=Mus musculus OX=10090 GN=Cacna2d3 PE=1 SV=1	1	7	7	7	0	0	0	2	6	4	0	0	0	2	6	4	0	0	0	2	6	4	8.6	8.6	8.6	122.78	1091	1091	0	8.6492	0	0	0	1.8	7.1	4.6	85287000	0	0	0	11151000	45681000	28455000	0
sp|Q5FWK3|RHG01_MOUSE	sp|Q5FWK3|RHG01_MOUSE	30	30	30	sp|Q5FWK3|RHG01_MOUSE Rho GTPase-activating protein 1 OS=Mus musculus OX=10090 GN=Arhgap1 PE=1 SV=1	1	30	30	30	5	0	4	27	25	28	5	0	4	27	25	28	5	0	4	27	25	28	86.3	86.3	86.3	50.41	439	439	0	323.31	16.2	0	11.4	84.5	72	72	26911000000	75570000	0	61137000	8245100000	6968500000	11561000000	9586000
sp|Q8BGK5|S35F1_MOUSE	sp|Q8BGK5|S35F1_MOUSE	2	2	2	sp|Q8BGK5|S35F1_MOUSE Solute carrier family 35 member F1 OS=Mus musculus OX=10090 GN=Slc35f1 PE=1 SV=1	1	2	2	2	0	0	0	1	1	2	0	0	0	1	1	2	0	0	0	1	1	2	11.3	11.3	11.3	45.304	408	408	0	43.627	0	0	0	8.6	2.7	11.3	78608000	0	0	0	10560000	12386000	55662000	0
sp|Q8BIV3|RNBP6_MOUSE	sp|Q8BIV3|RNBP6_MOUSE	12	11	11	sp|Q8BIV3|RNBP6_MOUSE Ran-binding protein 6 OS=Mus musculus OX=10090 GN=Ranbp6 PE=1 SV=3	1	12	11	11	1	0	1	4	6	7	0	0	0	4	5	7	0	0	0	4	5	7	12.5	11.4	11.4	124.59	1105	1105	0	26.857	1.1	0	1.1	4.3	5.7	7.7	81569000	0	0	0	14661000	31484000	35423000	0
sp|Q62313|TGON1_MOUSE;sp|Q62314|TGON2_MOUSE	sp|Q62313|TGON1_MOUSE;sp|Q62314|TGON2_MOUSE	2;2	2;2	2;2	sp|Q62313|TGON1_MOUSE Trans-Golgi network integral membrane protein 1 OS=Mus musculus OX=10090 GN=Tgoln1 PE=1 SV=1;sp|Q62314|TGON2_MOUSE Trans-Golgi network integral membrane protein 2 OS=Mus musculus OX=10090 GN=Tgoln2 PE=1 SV=1	2	2	2	2	0	0	0	2	2	2	0	0	0	2	2	2	0	0	0	2	2	2	2.8	2.8	2.8	37.848	353	353;363	0	4.3329	0	0	0	2.8	2.8	2.8	194550000	0	0	0	41429000	31868000	121250000	0
sp|Q60673|PTPRN_MOUSE	sp|Q60673|PTPRN_MOUSE	10	9	9	sp|Q60673|PTPRN_MOUSE Receptor-type tyrosine-protein phosphatase-like N OS=Mus musculus OX=10090 GN=Ptprn PE=1 SV=2	1	10	9	9	0	0	0	3	4	8	0	0	0	3	3	7	0	0	0	3	3	7	16.3	14.9	14.9	106.08	979	979	0	44.251	0	0	0	5.7	7.8	14.1	119550000	0	0	0	11952000	47231000	60364000	0
sp|Q9QYG0|NDRG2_MOUSE	sp|Q9QYG0|NDRG2_MOUSE	15	15	15	sp|Q9QYG0|NDRG2_MOUSE Protein NDRG2 OS=Mus musculus OX=10090 GN=Ndrg2 PE=1 SV=1	1	15	15	15	7	0	4	14	14	14	7	0	4	14	14	14	7	0	4	14	14	14	66.6	66.6	66.6	40.789	371	371	0	323.31	31.8	0	18.9	58.2	58.2	60.4	3920000000	78565000	0	28898000	524680000	1396300000	1891600000	79386000
sp|Q80Y55|BSDC1_MOUSE	sp|Q80Y55|BSDC1_MOUSE	10	10	10	sp|Q80Y55|BSDC1_MOUSE BSD domain-containing protein 1 OS=Mus musculus OX=10090 GN=Bsdc1 PE=1 SV=1	1	10	10	10	3	0	2	10	8	7	3	0	2	10	8	7	3	0	2	10	8	7	32.3	32.3	32.3	46.952	427	427	0	323.31	9.1	0	4.9	32.3	26.9	24.4	797550000	6931700	0	5661700	401930000	177670000	205360000	5022100
sp|Q8R420|ABCA3_MOUSE;sp|E9PX95|ABCAH_MOUSE	sp|Q8R420|ABCA3_MOUSE	7;1	7;1	7;1	sp|Q8R420|ABCA3_MOUSE ATP-binding cassette sub-family A member 3 OS=Mus musculus OX=10090 GN=Abca3 PE=1 SV=3	2	7	7	7	0	0	0	2	3	5	0	0	0	2	3	5	0	0	0	2	3	5	5	5	5	191.97	1704	1704;1733	0	11.87	0	0	0	1.4	1.8	3.6	32065000	0	0	0	3999200	6835100	21231000	0
sp|P61028|RAB8B_MOUSE	sp|P61028|RAB8B_MOUSE	8	5	3	sp|P61028|RAB8B_MOUSE Ras-related protein Rab-8B OS=Mus musculus OX=10090 GN=Rab8b PE=1 SV=1	1	8	5	3	4	0	3	6	6	6	2	0	1	3	4	3	2	0	1	3	2	2	41.5	28	17.4	23.603	207	207	0	128.16	21.7	0	15.9	30.9	32.4	29.5	1045300000	30890000	0	37411000	148670000	435860000	392510000	25868000
sp|Q80Y98|DDHD2_MOUSE	sp|Q80Y98|DDHD2_MOUSE	9	9	9	sp|Q80Y98|DDHD2_MOUSE Phospholipase DDHD2 OS=Mus musculus OX=10090 GN=Ddhd2 PE=1 SV=3	1	9	9	9	0	0	0	5	2	7	0	0	0	5	2	7	0	0	0	5	2	7	16.9	16.9	16.9	79.576	699	699	0	14.56	0	0	0	9	3.3	11.6	69157000	0	0	0	33006000	18827000	17324000	0
sp|Q62465|VAT1_MOUSE	sp|Q62465|VAT1_MOUSE	23	23	23	sp|Q62465|VAT1_MOUSE Synaptic vesicle membrane protein VAT-1 homolog OS=Mus musculus OX=10090 GN=Vat1 PE=1 SV=3	1	23	23	23	10	0	2	22	19	23	10	0	2	22	19	23	10	0	2	22	19	23	57.9	57.9	57.9	43.096	406	406	0	323.31	35.2	0	7.6	57.9	56.4	57.9	21416000000	572940000	0	32605000	5945800000	5024000000	9841200000	105980000
sp|P11627|L1CAM_MOUSE	sp|P11627|L1CAM_MOUSE	7	7	7	sp|P11627|L1CAM_MOUSE Neural cell adhesion molecule L1 OS=Mus musculus OX=10090 GN=L1cam PE=1 SV=1	1	7	7	7	0	0	0	5	3	4	0	0	0	5	3	4	0	0	0	5	3	4	7.4	7.4	7.4	140.97	1260	1260	0	12.089	0	0	0	5	2.9	4.5	51921000	0	0	0	11130000	12743000	28048000	0
sp|Q91V41|RAB14_MOUSE	sp|Q91V41|RAB14_MOUSE	23	23	23	sp|Q91V41|RAB14_MOUSE Ras-related protein Rab-14 OS=Mus musculus OX=10090 GN=Rab14 PE=1 SV=3	1	23	23	23	13	0	9	21	18	20	13	0	9	21	18	20	13	0	9	21	18	20	86.5	86.5	86.5	23.897	215	215	0	323.31	71.2	0	62.3	82.8	82.8	82.8	22076000000	874940000	0	272830000	5351300000	6269900000	9307100000	208940000
sp|Q923S9|RAB30_MOUSE	sp|Q923S9|RAB30_MOUSE	13	13	12	sp|Q923S9|RAB30_MOUSE Ras-related protein Rab-30 OS=Mus musculus OX=10090 GN=Rab30 PE=1 SV=1	1	13	13	12	0	0	0	8	7	13	0	0	0	8	7	13	0	0	0	7	6	12	69.5	69.5	63.1	23.058	203	203	0	222.04	0	0	0	45.8	45.3	69.5	2089600000	0	0	0	501460000	494880000	1093300000	0
sp|P62071|RRAS2_MOUSE;sp|P10833|RRAS_MOUSE	sp|P62071|RRAS2_MOUSE	3;1	3;1	3;1	sp|P62071|RRAS2_MOUSE Ras-related protein R-Ras2 OS=Mus musculus OX=10090 GN=Rras2 PE=1 SV=1	2	3	3	3	0	0	0	2	3	3	0	0	0	2	3	3	0	0	0	2	3	3	17.2	17.2	17.2	23.399	204	204;218	0	28.308	0	0	0	11.8	17.2	17.2	136650000	0	0	0	27093000	44412000	65145000	0
sp|Q9QXV0|PCS1N_MOUSE	sp|Q9QXV0|PCS1N_MOUSE	7	7	7	sp|Q9QXV0|PCS1N_MOUSE ProSAAS OS=Mus musculus OX=10090 GN=Pcsk1n PE=1 SV=2	1	7	7	7	0	0	0	1	6	5	0	0	0	1	6	5	0	0	0	1	6	5	39.1	39.1	39.1	27.27	258	258	0	18.818	0	0	0	5.8	31	29.8	135890000	0	0	0	6851400	76539000	52500000	0
sp|O70480|VAMP4_MOUSE	sp|O70480|VAMP4_MOUSE	4	4	4	sp|O70480|VAMP4_MOUSE Vesicle-associated membrane protein 4 OS=Mus musculus OX=10090 GN=Vamp4 PE=1 SV=1	1	4	4	4	0	0	0	3	4	3	0	0	0	3	4	3	0	0	0	3	4	3	36.9	36.9	36.9	16.353	141	141	0	274.2	0	0	0	31.9	36.9	36.9	221870000	0	0	0	27072000	86701000	108100000	0
sp|Q9WTT4|VATG2_MOUSE	sp|Q9WTT4|VATG2_MOUSE	11	11	11	sp|Q9WTT4|VATG2_MOUSE V-type proton ATPase subunit G 2 OS=Mus musculus OX=10090 GN=Atp6v1g2 PE=1 SV=1	1	11	11	11	2	2	2	11	9	9	2	2	2	11	9	9	2	2	2	11	9	9	63.6	63.6	63.6	13.651	118	118	0	323.31	13.6	13.6	13.6	63.6	61.9	61.9	65986000000	23642000	7481300	11614000	25537000000	13669000000	26737000000	18248000
sp|Q3TFQ1|SPRY7_MOUSE	sp|Q3TFQ1|SPRY7_MOUSE	8	8	8	sp|Q3TFQ1|SPRY7_MOUSE SPRY domain-containing protein 7 OS=Mus musculus OX=10090 GN=Spryd7 PE=1 SV=2	1	8	8	8	0	0	0	5	3	6	0	0	0	5	3	6	0	0	0	5	3	6	50.5	50.5	50.5	21.681	196	196	0	25.61	0	0	0	30.6	13.8	36.7	437760000	0	0	0	84444000	66916000	286400000	0
sp|Q922P8|T132A_MOUSE	sp|Q922P8|T132A_MOUSE	4	4	4	sp|Q922P8|T132A_MOUSE Transmembrane protein 132A OS=Mus musculus OX=10090 GN=Tmem132a PE=1 SV=2	1	4	4	4	0	0	0	1	2	4	0	0	0	1	2	4	0	0	0	1	2	4	5.6	5.6	5.6	110.24	1018	1018	0	8.9736	0	0	0	1.6	3.1	5.6	12394000	0	0	0	507530	2529600	9356600	0
sp|Q9Z0H4|CELF2_MOUSE	sp|Q9Z0H4|CELF2_MOUSE	15	15	12	sp|Q9Z0H4|CELF2_MOUSE CUGBP Elav-like family member 2 OS=Mus musculus OX=10090 GN=Celf2 PE=1 SV=1	1	15	15	12	6	5	6	15	11	10	6	5	6	15	11	10	6	4	5	12	8	7	34.6	34.6	28.5	54.27	508	508	0	289.41	15.7	10	14.2	34.6	20.5	18.7	4630900000	166070000	55427000	208620000	2446200000	816940000	937640000	31687000
sp|Q80ZJ7|SNX32_MOUSE	sp|Q80ZJ7|SNX32_MOUSE	4	4	4	sp|Q80ZJ7|SNX32_MOUSE Sorting nexin-32 OS=Mus musculus OX=10090 GN=Snx32 PE=2 SV=1	1	4	4	4	0	0	0	1	4	3	0	0	0	1	4	3	0	0	0	1	4	3	12.1	12.1	12.1	46.646	404	404	0	8.346	0	0	0	2.2	12.1	8.7	84465000	0	0	0	7774800	33711000	42980000	0
sp|O35643|AP1B1_MOUSE	sp|O35643|AP1B1_MOUSE	62	34	34	sp|O35643|AP1B1_MOUSE AP-1 complex subunit beta-1 OS=Mus musculus OX=10090 GN=Ap1b1 PE=1 SV=2	1	62	34	34	31	5	21	54	39	47	15	0	5	27	17	21	15	0	5	27	17	21	64.2	43.6	43.6	103.93	943	943	0	323.31	33	6	21.1	61.7	45.7	49	9420100000	329740000	0	48513000	3448500000	2154000000	3439400000	283490000
sp|Q9R1Q7|PLP2_MOUSE	sp|Q9R1Q7|PLP2_MOUSE	2	2	2	sp|Q9R1Q7|PLP2_MOUSE Proteolipid protein 2 OS=Mus musculus OX=10090 GN=Plp2 PE=1 SV=1	1	2	2	2	0	0	0	1	1	2	0	0	0	1	1	2	0	0	0	1	1	2	17.8	17.8	17.8	16.607	152	152	0	58.147	0	0	0	7.9	7.9	17.8	87477000	0	0	0	17619000	19142000	50716000	0
sp|A2CG49|KALRN_MOUSE	sp|A2CG49|KALRN_MOUSE	10	5	5	sp|A2CG49|KALRN_MOUSE Kalirin OS=Mus musculus OX=10090 GN=Kalrn PE=1 SV=1	1	10	5	5	4	0	2	3	5	6	1	0	1	1	3	3	1	0	1	1	3	3	3.9	2.3	2.3	337	2964	2964	0	11.848	1.5	0	0.7	1.2	1.9	2.5	32689000	600650	0	1143600	3020100	18501000	9424200	0
sp|P10852|4F2_MOUSE	sp|P10852|4F2_MOUSE	7	7	7	sp|P10852|4F2_MOUSE 4F2 cell-surface antigen heavy chain OS=Mus musculus OX=10090 GN=Slc3a2 PE=1 SV=1	1	7	7	7	0	1	0	4	3	5	0	1	0	4	3	5	0	1	0	4	3	5	15	15	15	58.336	526	526	0	32.898	0	2.7	0	9.1	6.5	11.2	163320000	0	2189200	0	50534000	29996000	80599000	0
sp|Q69Z26|CNTN4_MOUSE	sp|Q69Z26|CNTN4_MOUSE	6	6	5	sp|Q69Z26|CNTN4_MOUSE Contactin-4 OS=Mus musculus OX=10090 GN=Cntn4 PE=1 SV=2	1	6	6	5	0	0	0	6	1	4	0	0	0	6	1	4	0	0	0	5	0	3	7.3	7.3	6.3	113.49	1026	1026	0	11.903	0	0	0	7.3	1	4.3	68511000	0	0	0	27204000	17936000	23371000	0
sp|O55013|TPPC3_MOUSE	sp|O55013|TPPC3_MOUSE	5	5	5	sp|O55013|TPPC3_MOUSE Trafficking protein particle complex subunit 3 OS=Mus musculus OX=10090 GN=Trappc3 PE=1 SV=1	1	5	5	5	1	0	1	4	3	4	1	0	1	4	3	4	1	0	1	4	3	4	30.6	30.6	30.6	20.302	180	180	0	24.862	7.2	0	8.3	24.4	21.7	26.1	385430000	2780600	0	3069300	85687000	98015000	195880000	6995800
sp|P60122|RUVB1_MOUSE	sp|P60122|RUVB1_MOUSE	10	10	10	sp|P60122|RUVB1_MOUSE RuvB-like 1 OS=Mus musculus OX=10090 GN=Ruvbl1 PE=1 SV=1	1	10	10	10	4	0	2	6	9	8	4	0	2	6	9	8	4	0	2	6	9	8	32.2	32.2	32.2	50.213	456	456	0	98.022	11.2	0	4.8	19.3	29.2	24.6	663340000	21124000	0	6809100	136310000	342490000	156610000	6062000
sp|Q9EPJ9|ARFG1_MOUSE	sp|Q9EPJ9|ARFG1_MOUSE	30	30	30	sp|Q9EPJ9|ARFG1_MOUSE ADP-ribosylation factor GTPase-activating protein 1 OS=Mus musculus OX=10090 GN=Arfgap1 PE=1 SV=2	1	30	30	30	15	0	18	27	26	29	15	0	18	27	26	29	15	0	18	27	26	29	65.7	65.7	65.7	45.288	414	414	0	323.31	46.9	0	48.8	65.2	64.5	65.7	23736000000	418060000	0	2474100000	4087400000	8184500000	8571900000	175500000
sp|Q60963|PAFA_MOUSE	sp|Q60963|PAFA_MOUSE	18	18	18	sp|Q60963|PAFA_MOUSE Platelet-activating factor acetylhydrolase OS=Mus musculus OX=10090 GN=Pla2g7 PE=2 SV=2	1	18	18	18	2	0	0	11	6	14	2	0	0	11	6	14	2	0	0	11	6	14	46.8	46.8	46.8	49.258	440	440	0	161.12	6.4	0	0	28.6	14.3	35.7	1659800000	28283000	0	0	517320000	257180000	857040000	12345000
sp|Q9CY18|SNX7_MOUSE	sp|Q9CY18|SNX7_MOUSE	5	5	5	sp|Q9CY18|SNX7_MOUSE Sorting nexin-7 OS=Mus musculus OX=10090 GN=Snx7 PE=1 SV=1	1	5	5	5	0	0	0	3	2	3	0	0	0	3	2	3	0	0	0	3	2	3	15.5	15.5	15.5	45	387	387	0	12.734	0	0	0	10.6	7	8	104540000	0	0	0	23364000	28401000	52777000	0
sp|Q8BWM0|PGES2_MOUSE	sp|Q8BWM0|PGES2_MOUSE	15	15	15	sp|Q8BWM0|PGES2_MOUSE Prostaglandin E synthase 2 OS=Mus musculus OX=10090 GN=Ptges2 PE=1 SV=3	1	15	15	15	0	0	0	4	4	12	0	0	0	4	4	12	0	0	0	4	4	12	56.2	56.2	56.2	43.323	384	384	0	165.07	0	0	0	11.5	19.5	45.6	667080000	0	0	0	88011000	150460000	428600000	0
sp|Q80XQ2|TBCD5_MOUSE	sp|Q80XQ2|TBCD5_MOUSE	8	8	8	sp|Q80XQ2|TBCD5_MOUSE TBC1 domain family member 5 OS=Mus musculus OX=10090 GN=Tbc1d5 PE=1 SV=2	1	8	8	8	1	0	1	6	5	3	1	0	1	6	5	3	1	0	1	6	5	3	16.6	16.6	16.6	91.836	815	815	0	57.79	1.7	0	1.7	14.1	7.7	4.3	125850000	4966400	0	3364600	41390000	39600000	36526000	3241200
sp|Q8BLK3|LSAMP_MOUSE	sp|Q8BLK3|LSAMP_MOUSE	14	14	14	sp|Q8BLK3|LSAMP_MOUSE Limbic system-associated membrane protein OS=Mus musculus OX=10090 GN=Lsamp PE=1 SV=1	1	14	14	14	2	0	0	13	8	10	2	0	0	13	8	10	2	0	0	13	8	10	40.2	40.2	40.2	38.086	341	341	0	323.31	5.3	0	0	39.9	26.4	28.2	2441800000	8853000	0	0	840230000	650020000	942710000	11425000
sp|P17427|AP2A2_MOUSE	sp|P17427|AP2A2_MOUSE	61	45	45	sp|P17427|AP2A2_MOUSE AP-2 complex subunit alpha-2 OS=Mus musculus OX=10090 GN=Ap2a2 PE=1 SV=2	1	61	45	45	32	5	37	55	49	57	21	2	24	42	36	41	21	2	24	42	36	41	65	49.4	49.4	104.02	938	938	0	323.31	40.3	5.8	42.5	62	59.7	63.9	47894000000	407520000	4611400	562070000	14717000000	9855700000	22348000000	303600000
sp|O54901|OX2G_MOUSE	sp|O54901|OX2G_MOUSE	6	6	6	sp|O54901|OX2G_MOUSE OX-2 membrane glycoprotein OS=Mus musculus OX=10090 GN=Cd200 PE=1 SV=1	1	6	6	6	0	0	0	3	4	6	0	0	0	3	4	6	0	0	0	3	4	6	21.9	21.9	21.9	31.256	278	278	0	85.128	0	0	0	12.6	15.5	21.9	528020000	0	0	0	39982000	125470000	362560000	0
sp|Q3U0M1|TPPC9_MOUSE	sp|Q3U0M1|TPPC9_MOUSE	14	14	14	sp|Q3U0M1|TPPC9_MOUSE Trafficking protein particle complex subunit 9 OS=Mus musculus OX=10090 GN=Trappc9 PE=1 SV=2	1	14	14	14	1	0	1	11	7	8	1	0	1	11	7	8	1	0	1	11	7	8	14	14	14	128.23	1148	1148	0	42.814	1.1	0	1	10.9	7.2	8.4	171300000	2042200	0	1628300	36660000	67971000	62995000	1202300
sp|Q99JY0|ECHB_MOUSE	sp|Q99JY0|ECHB_MOUSE	15	15	15	sp|Q99JY0|ECHB_MOUSE Trifunctional enzyme subunit beta, mitochondrial OS=Mus musculus OX=10090 GN=Hadhb PE=1 SV=1	1	15	15	15	0	0	0	10	5	10	0	0	0	10	5	10	0	0	0	10	5	10	37.7	37.7	37.7	51.386	475	475	0	70.698	0	0	0	23.4	16.2	28.6	637840000	0	0	0	281450000	87753000	268640000	0
sp|P70232|NCHL1_MOUSE	sp|P70232|NCHL1_MOUSE	6	6	6	sp|P70232|NCHL1_MOUSE Neural cell adhesion molecule L1-like protein OS=Mus musculus OX=10090 GN=Chl1 PE=1 SV=2	1	6	6	6	1	0	0	4	2	4	1	0	0	4	2	4	1	0	0	4	2	4	8.4	8.4	8.4	135.07	1209	1209	0	12.961	0.7	0	0	4.9	1.4	6.2	31938000	0	0	0	9273700	9241900	13422000	0
sp|Q5XJV6|LMTK3_MOUSE	sp|Q5XJV6|LMTK3_MOUSE	15	15	15	sp|Q5XJV6|LMTK3_MOUSE Serine/threonine-protein kinase LMTK3 OS=Mus musculus OX=10090 GN=Lmtk3 PE=1 SV=1	1	15	15	15	0	0	0	9	7	12	0	0	0	9	7	12	0	0	0	9	7	12	16.4	16.4	16.4	150.89	1424	1424	0	70.276	0	0	0	10	8.2	13.5	191950000	0	0	0	25547000	42269000	124130000	0
sp|Q00493|CBPE_MOUSE	sp|Q00493|CBPE_MOUSE	21	21	21	sp|Q00493|CBPE_MOUSE Carboxypeptidase E OS=Mus musculus OX=10090 GN=Cpe PE=1 SV=2	1	21	21	21	0	0	0	11	13	20	0	0	0	11	13	20	0	0	0	11	13	20	55.9	55.9	55.9	53.255	476	476	0	323.31	0	0	0	32.1	38.4	55.9	5081600000	0	0	0	1188000000	1210100000	2683500000	0
sp|P41216|ACSL1_MOUSE;sp|Q8JZR0|ACSL5_MOUSE	sp|P41216|ACSL1_MOUSE	39;2	39;2	39;2	sp|P41216|ACSL1_MOUSE Long-chain-fatty-acid--CoA ligase 1 OS=Mus musculus OX=10090 GN=Acsl1 PE=1 SV=2	2	39	39	39	4	0	2	35	30	28	4	0	2	35	30	28	4	0	2	35	30	28	58.5	58.5	58.5	77.951	699	699;683	0	323.31	7.4	0	3	55.8	49.4	50.1	6955900000	8115500	0	7404200	3803900000	1795900000	1340500000	1499600
sp|A2AWA9|RBGP1_MOUSE	sp|A2AWA9|RBGP1_MOUSE	39	39	36	sp|A2AWA9|RBGP1_MOUSE Rab GTPase-activating protein 1 OS=Mus musculus OX=10090 GN=Rabgap1 PE=1 SV=1	1	39	39	36	7	0	6	16	27	34	7	0	6	16	27	34	6	0	6	16	25	32	39.7	39.7	38.2	120.8	1064	1064	0	177.4	7.8	0	7.1	17.3	26.3	34.4	1374900000	40947000	0	37397000	246680000	429510000	620380000	19136000
sp|O35405|PLD3_MOUSE	sp|O35405|PLD3_MOUSE	3	3	3	sp|O35405|PLD3_MOUSE Phospholipase D3 OS=Mus musculus OX=10090 GN=Pld3 PE=1 SV=1	1	3	3	3	0	0	0	1	1	3	0	0	0	1	1	3	0	0	0	1	1	3	8.4	8.4	8.4	54.388	488	488	0	12.502	0	0	0	2.5	2	8.4	59799000	0	0	0	8531500	9078300	42189000	0
sp|Q8VEH3|ARL8A_MOUSE	sp|Q8VEH3|ARL8A_MOUSE	16	16	8	sp|Q8VEH3|ARL8A_MOUSE ADP-ribosylation factor-like protein 8A OS=Mus musculus OX=10090 GN=Arl8a PE=1 SV=1	1	16	16	8	9	1	11	12	13	14	9	1	11	12	13	14	4	0	6	6	5	6	71	71	43	21.39	186	186	0	323.31	47.8	12.9	59.7	59.7	65.1	71	9688400000	141590000	2197100	419950000	3587200000	3469200000	2068300000	177640000
sp|P62984|RL40_MOUSE;sp|P62983|RS27A_MOUSE;sp|P0CG49|UBB_MOUSE;sp|P0CG50|UBC_MOUSE	sp|P62984|RL40_MOUSE;sp|P62983|RS27A_MOUSE;sp|P0CG49|UBB_MOUSE;sp|P0CG50|UBC_MOUSE	5;5;5;5	5;5;5;5	5;5;5;5	sp|P62984|RL40_MOUSE Ubiquitin-60S ribosomal protein L40 OS=Mus musculus OX=10090 GN=Uba52 PE=1 SV=2;sp|P62983|RS27A_MOUSE Ubiquitin-40S ribosomal protein S27a OS=Mus musculus OX=10090 GN=Rps27a PE=1 SV=2;sp|P0CG49|UBB_MOUSE Polyubiquitin-B OS=Mus musculus	4	5	5	5	3	2	3	4	4	5	3	2	3	4	4	5	3	2	3	4	4	5	36.7	36.7	36.7	14.728	128	128;156;305;734	0	221.82	26.6	19.5	26.6	36.7	36.7	36.7	5200000000	228830000	27237000	235020000	1654400000	1583000000	1471500000	124110000
sp|Q60952|CP250_MOUSE	sp|Q60952|CP250_MOUSE	1	1	1	sp|Q60952|CP250_MOUSE Centrosome-associated protein CEP250 OS=Mus musculus OX=10090 GN=Cep250 PE=1 SV=4	1	1	1	1	0	0	0	1	1	1	0	0	0	1	1	1	0	0	0	1	1	1	0.5	0.5	0.5	276.81	2414	2414	0.0076215	2.1993	0	0	0	0.5	0.5	0.5	195410000	0	0	0	89520000	34574000	71321000	0
sp|P60904|DNJC5_MOUSE	sp|P60904|DNJC5_MOUSE	11	11	11	sp|P60904|DNJC5_MOUSE DnaJ homolog subfamily C member 5 OS=Mus musculus OX=10090 GN=Dnajc5 PE=1 SV=1	1	11	11	11	0	0	2	10	10	11	0	0	2	10	10	11	0	0	2	10	10	11	59.1	59.1	59.1	22.101	198	198	0	323.31	0	0	24.7	54.5	54.5	59.1	44009000000	0	0	10644000	6503600000	13591000000	23904000000	0
sp|Q810U4|NRCAM_MOUSE	sp|Q810U4|NRCAM_MOUSE	7	7	7	sp|Q810U4|NRCAM_MOUSE Neuronal cell adhesion molecule OS=Mus musculus OX=10090 GN=Nrcam PE=1 SV=2	1	7	7	7	1	0	0	6	3	2	1	0	0	6	3	2	1	0	0	6	3	2	7.5	7.5	7.5	138.52	1256	1256	0	36.668	1.2	0	0	6.4	3.7	2	64516000	6939200	0	0	21368000	23914000	12296000	2901100
sp|O35099|M3K5_MOUSE;sp|A2AQW0|M3K15_MOUSE	sp|O35099|M3K5_MOUSE	16;2	16;2	16;2	sp|O35099|M3K5_MOUSE Mitogen-activated protein kinase kinase kinase 5 OS=Mus musculus OX=10090 GN=Map3k5 PE=1 SV=3	2	16	16	16	3	1	1	9	9	7	3	1	1	9	9	7	3	1	1	9	9	7	13.1	13.1	13.1	154.51	1380	1380;1331	0	28.162	2.8	0.7	0.7	7.7	7.7	5.6	173150000	6476600	1329900	3914800	54712000	68208000	38506000	5642700
sp|Q8BVI5|STX16_MOUSE	sp|Q8BVI5|STX16_MOUSE	14	14	14	sp|Q8BVI5|STX16_MOUSE Syntaxin-16 OS=Mus musculus OX=10090 GN=Stx16 PE=1 SV=3	1	14	14	14	0	1	0	8	8	14	0	1	0	8	8	14	0	1	0	8	8	14	55.5	55.5	55.5	37.08	326	326	0	323.31	0	2.8	0	26.1	27.6	55.5	2302200000	0	1524300	0	133020000	610470000	1557100000	0
sp|D3YVE8|S35G2_MOUSE	sp|D3YVE8|S35G2_MOUSE	6	6	6	sp|D3YVE8|S35G2_MOUSE Solute carrier family 35 member G2 OS=Mus musculus OX=10090 GN=Slc35g2 PE=1 SV=1	1	6	6	6	0	0	0	5	2	4	0	0	0	5	2	4	0	0	0	5	2	4	19.2	19.2	19.2	46.395	412	412	0	30.643	0	0	0	16.7	7.3	15	106820000	0	0	0	58978000	9137700	38709000	0
sp|Q9WTQ5|AKA12_MOUSE	sp|Q9WTQ5|AKA12_MOUSE	9	9	9	sp|Q9WTQ5|AKA12_MOUSE A-kinase anchor protein 12 OS=Mus musculus OX=10090 GN=Akap12 PE=1 SV=1	1	9	9	9	4	0	3	6	6	4	4	0	3	6	6	4	4	0	3	6	6	4	6.9	6.9	6.9	180.69	1684	1684	0	99.13	3.6	0	2.6	4.5	5	3.3	194670000	9469500	0	7246500	13647000	123640000	40668000	6733700
sp|Q6QI06|RICTR_MOUSE	sp|Q6QI06|RICTR_MOUSE	17	17	17	sp|Q6QI06|RICTR_MOUSE Rapamycin-insensitive companion of mTOR OS=Mus musculus OX=10090 GN=Rictor PE=1 SV=2	1	17	17	17	2	0	1	8	4	11	2	0	1	8	4	11	2	0	1	8	4	11	12.3	12.3	12.3	191.57	1708	1708	0	35.646	1.2	0	0.6	5.7	3.3	7.2	98756000	2808200	0	2341900	17412000	25984000	50210000	3803700
sp|Q8BQZ4|RLGPB_MOUSE	sp|Q8BQZ4|RLGPB_MOUSE	45	45	45	sp|Q8BQZ4|RLGPB_MOUSE Ral GTPase-activating protein subunit beta OS=Mus musculus OX=10090 GN=Ralgapb PE=1 SV=2	1	45	45	45	6	0	4	33	21	42	6	0	4	33	21	42	6	0	4	33	21	42	40.4	40.4	40.4	165.2	1484	1484	0	323.31	6.1	0	3.7	33.9	22.8	36.9	2829600000	7723400	0	8774700	732810000	448120000	1632100000	6429900
[truncated: 5 more columns]
