# Supplementary material for: Localization, proteomics, and metabolite profiling reveal a putative vesicular transporter for UDP-glucose
Source: eLife. 2021 Jul 16;10:e65417. doi: 10.7554/eLife.65417 (PMC8373376; doi:10.7554/eLife.65417)
Supplement: Figure 3—source data 1. [file elife-65417-fig3-data1.xlsx]

## Sheet: Sheet1
organelle darkness
Mito (OMM)-APEX2	Non-transfected	VGLUT1-APEX2	SLC35D3-APEX2
115.353	88.118	75.332	78.82
111.28	102.684	75.281	78.071
114.661	73.485	63.942	81.953
113.869	83.174	69.592	61.463
121.507	88.76	76.441	71.38
126.693	100.589	72.523	70.948
128.464	100.581	72.819	58.16
127.773	77.573	66.877	81.015
123.809	86.452	56.001	80.629
138.74	95.791	41.714	77.72
137.806	93.087	40.497	80.011
139.366	86.849	47.205	75.765
143.414	92.461	45.174	75.226
150.243	95.244	60.604	78.841
144.175	99.665	77.466	70.565
	93.969	53.601	78.589
	104.936	63.305	52.464
	96.371	60.989	58.907
	111.992	81.839	54.588
	114.756	75.372	60.105
	105.457	78.883	47.639
	107.833	83.34	38.028
	100.256	76.721	47.808
	104.566	79.015	49.852
	120.231	55.685	39.871
	113.967	73.455	48.268
	92.666	71.166	148.015
	106.024	52.242	142.325
	97.446	60.429	156.869
	110.63	155.871	155.838
	90.743	141.742	154.885
	98.343	127.42	156.31
	91.506	153.307	168.105
	101.072	140.423	159.475
	103.859	137.848	129.993
	95.6	146.09	166.962
	99.823	135.351	158.568
	101.173	137.738	141.93
	88.453	138.615	157.85
	99.374	143.923	145.279
	98.155	134.81	141.008
	84.088	147.263	150.826
	86.512	148.806	144.955
	78.865	142.235	120.906
	100.481	129.824	125.939
	108.956	138.8	141.613
	90.166	140.628	154.121
	80.081	127.717	167.896
	74.093	148.999	158.123
	85.367	140.367	156.168
	99.843	145.761	160.534
	88.614	124.114	156.443
	93.975	125.946	155.664
	98.031	132.034	159.484
	90.561	126.798	154.722
	98.829	124.964	146.008
	81.955	114.1	150.891
	100.811	144.247	140.912
	86.794	130.808	147.874
	88	105.776	160.048
	82.493	147.2	145.879
	83.665	138.493	157.99
	88.38	136.744	133.115
	102.779		129.621
	85.147		138.311
	74.181		159.717
	77.241		122.779
	62.758		119.473
	102.003		141.861
	105.144		123.12
	99.68
	88.484
	109.246
	88.584
	91.286
	82.441
	83.725
	67.632
	83.701
	91.492
	89.417
	99.059
	108.991
	114.872
	97.531
	102.912
	98.828
	84.076
	90.55
	84.774
	92.691
