# Supplementary material for: Localization, proteomics, and metabolite profiling reveal a putative vesicular transporter for UDP-glucose
Source: eLife. 2021 Jul 16;10:e65417. doi: 10.7554/eLife.65417 (PMC8373376; doi:10.7554/eLife.65417)
Supplement: Figure 4—source data 1. [file elife-65417-fig4-data1.xlsx]

## Sheet: Fig 4B
	CMP-SA	UDP-gal	UDP-glc	UDP-xyl	UDP-glcNAc & UDP-galNAc	UDP-glcA	GDP-Man	GDP-fuc
Retention time (min)	Ion intensity
0.50757	0	0		1.1e-05	0	0	0	0
0.52424	0	0		1.1e-05	0	0	0	0
0.54091	0	0		0	0	0	0	0
0.55758	0	0		0	0	0	0.000195	0
0.57425	0	0		0	0	0	0.0002	0
0.59093	0	0		0	0	0	0	0
0.6076	7e-06	0		0	0	0	0	0
0.62427	7e-06	0		0	0	0	0	0
0.64094	7e-06	6e-06		0	0	0	0.000269	0
0.65761	9e-06	0		0	0	0	0.000276	0
0.67429	0	0		0	0	0	0	0
0.69096	4.6e-05	0		0	0	0	0	0
0.70763	5.2e-05	3.9e-05		0	0	0	0	0
0.7243	0	9.1e-05		0	0	0	0	0
0.74097	0	0		4e-06	0	0	0	0
0.75765	0	0		4e-06	0	0	0	0
0.77432	0	0		0	0	0	0	0
0.79099	0	0		0	0	0	0	6.39925
0.80766	0	0		0	0	0	0	6.56159
0.82433	6e-06	3.4e-05		0	0	0	0	0
0.84101	6e-06	0.000175		3.49803	0	0	0	0
0.85768	0	0		3.58673	0	0	0	0
0.87435	0	9e-06		4e-06	0	0	0	0
0.89102	0	4.9e-05		0	0	0	0	0
0.90769	4e-06	0		0	0	0	0	0
0.92437	5e-06	0		0.000138	0	0	0	0
0.94104	0	5.1e-05		0	0	0	2.12905	0
0.95771	0	3.9e-05		0	0	0	2.18306	0
0.97439	0	0		0	0	0	0	0
0.99106	0	2.1e-05		3e-05	0	0	0	0
1.00773	3e-06	4.4e-05		0.17464	0	0	0	0
1.0244	3e-06	2.5e-05		0.17911	0	0	0	0
1.04108	0	0		0	0	0	0	0
1.05775	0	5.5e-05		0	0	0	0	0
1.07442	0	4.9e-05		0	0	0	0	0
1.09109	0	0		0.000109	0.0788	0	0	0
1.10776	0	0		0	0.0808	0	0	0
1.12443	0	4e-06		1.6e-05	0	0.000207	0	0
1.14111	1.1e-05	4e-06		2e-05	8e-06	0.000212	0	0
1.15778	0	4.1e-05		0	0.000688	0	0	0
1.17445	2.4e-05	0.000103		3.3e-05	0	0	0	0
1.19112	3.4e-05	6.9e-05		0.000123	0	0	0	0
1.2078	0	4.3e-05		0.000108	0	0	8.2e-05	0
1.22447	0	7.7e-05		3.9e-05	0	0	8.4e-05	0
1.24114	1.4e-05	9.2e-05		0	0	0	0	0
1.25781	1.4e-05	0		0	0	0	0	0
1.27449	0	1.5e-05		0	0	0	0	0
1.29116	0	0		1.3e-05	0	0	0	0
1.30783	0	0		1.3e-05	0	0	1.78314	0
1.3245	0	0		0	0	0	1.82838	0
1.34118	0	0		0	0	0	0	0
1.35785	0	8e-06		0	0.82162	0	0	0
1.37452	7e-06	0		0	0.84246	0	0	0
1.39119	7e-06	0		9e-06	0	0	0	0
1.40786	0	0		3.6e-05	0	0	0	0
1.42454	0	0		0	0	0	0	0
1.44121	0	0		0	0	0.000201	0	0
1.45788	0	0		1.3e-05	0	0.000207	0	0
1.47455	0	0		0.000209	0	0	0	0
1.49122	0	0		0	0	0	0	0
1.5079	0	0		0	0	0	0.000175	0
1.52457	0	0		7e-06	0	0	0.000179	0
1.54124	3e-06	0		4e-06	0	0	0	0
1.55791	4.2e-05	0		9e-06	0	0	0	0
1.57458	3.9e-05	0		0	0	0	0	0
1.59126	0	0		5.5e-05	0	0	0	0
1.60793	0	5.3e-05		6.1e-05	0	0	0	0
1.6246	0	6e-05		1.6e-05	0	0	0	0
1.64127	0	0		3.5e-05	0	0	0	0
1.65794	0	0		0	0	0	0	0
1.67462	0	0		0	0	0	0	0.000112
1.69129	0	0		0	0	0	0	0.000114
1.70796	0	2.4e-05		0	0	0	0	0
1.72463	0	0		0	0	0	0	0
1.7413	0	0		0	0	0	0	0
1.75798	0	0		0	0	0	0	0
1.77465	0	0		0.000125	0	0	0	0
1.79132	0	0		0	0	0	0.000137	0
1.80799	0	6.3e-05		1.8e-05	0	0	0.00014	0
1.82466	0	0		2.8e-05	0	0	0	0
1.84133	1.9e-05	0		0	0	0	0	0
1.858	2e-05	0		0	0	0	0	0
1.87468	0	1.8e-05		0	0	0	0	0
1.89135	0	5e-05		3.2e-05	0	0	0	0
1.90802	0	0		6.5e-05	0	0	0	0
1.92469	0	1e-06		0	0	0	0	0
1.94137	0	1.1e-05		0	0	0	0	0
1.95804	8e-06	0		0	0	0	0	0
1.97471	4.9e-05	0		0	0	0	0	0
1.99138	3.9e-05	0		0.000121	0	0	0	0
2.00806	0	0		8.5e-05	0	0	0	0
2.02473	0	0		0	0	0	0	0
2.0414	0	0		0	0	0	0.000108	0
2.05807	0	1.5e-05		0	0	0	0.000111	0
2.07474	0	1.5e-05		0	0	0	0	0
2.09142	0	0		0	0	0	0	0
2.10809	0	0		0	0	0	0	0
2.12476	4e-06	2.5e-05		0	0	0	0	0
2.14143	0	2.5e-05		0	0	0	0	0
2.1581	0	0		0	0	0	0	0
2.17478	5e-06	0		0	0	14.3252	0	0
2.19145	6e-06	1e-05		0	0	14.6886	0	0
2.20812	0	2e-06		0	0	0	0.000181	0
2.22479	0	7e-06		0	0	0	3.83298	0
2.24146	0	1e-05		5e-06	0	0	3.92998	0
2.25814	0	2e-05		6e-06	0	0	0	0
2.27481	0	2.1e-05		0	0	0	0	0
2.29148	9e-06	0		0	0	0	0	0
2.30815	9e-06	1.1e-05		0	0	0	0	0
2.32482	0	1.6e-05		2.7e-05	0	0	0	0
2.3415	0	0		0	0	0	0	0
2.35817	0	4e-06		6e-06	0	0	0	0
2.37484	0	5e-06		2.2e-05	0	0	0	0
2.39151	0	0		2.1e-05	0	0	0	0
2.40819	0	0		0	0	0	0	0
2.42486	0	0		0	0	0	0	0
2.44153	0	1.8e-05		0	0	0.00015	0	0
2.4582	0	4e-05		4e-06	0.39741	0.000154	0	0
2.47487	0	5.3e-05		1.8e-05	0.40749	0	0	0
2.49154	7e-06	0		2.6e-05	0	7.6e-05	0	0
2.50822	8e-06	5e-06		3.02588	0	0.000165	0	0
2.52489	0	5e-06		3.10263	0	0	0	0
2.54156	0	0		0	0	0	0	0
2.55823	2e-06	0		0	0	0	0	0
2.57491	4.9e-05	0		0	0	0	0	0
2.59158	5.1e-05	0		0	0	0	0	0
2.60825	0	4.2e-05		0.02261	0	0	0	0
2.62492	0	9.4e-05		0.02329	0	0	0	0
2.64159	0	2e-05		0	0	0	0	0
2.65827	0	0		0	0	0	0	0
2.67494	0	0		0	0	0	0	0
2.69161	0	6.2e-05		0	0	0	0	0
2.70828	0	6.7e-05		0	0	0	0	0
2.72496	0	0		5.5e-05	0	0	0	0
2.74163	0	0		2.5e-05	0	0	0	0
2.7583	0	1.1e-05		0	0	0	0	0
2.77498	0	0		6e-06	0	0	0	0
2.79165	0	6e-06		5e-05	0	0	0	0
2.80832	0	1.2e-05		2.2e-05	0	0	0	0
2.82499	0	0		0	0	0	0	0
2.84166	0	6e-06		0	0	0	0	0
2.85833	0	1.3e-05		0.000196	0	0	0	0
2.87501	0	2.9e-05		0.000214	0	0	0	0
2.89168	1.6e-05	4.9e-05		0	0	0	0	0
2.90835	0	4e-06		0	0	0	0	0
2.92502	0	0		0	0	2.62155	0	0
2.9417	0	0		0	0	2.68805	0	0
2.95837	0	0		3e-06	0	0	0	0
2.97504	0	3.1e-05		1.2e-05	0	0	0	0
2.99171	0	3.2e-05		0	0	0	0	0
3.00839	1.6e-05	0		0	0	0	0	0
3.02506	0	1e-06		0	0	0	0	0
3.04173	0	2e-05		0	0	0	0.000138	0
3.0584	0	0		5e-06	0	0	0.000142	0
3.07507	1.6e-05	0		5e-06	0	0.13488	0	0
3.09175	2.5e-05	4e-06		0	0	0.1383	0	0
3.10842	5e-06	4e-05		0	0	0	0	0
3.12509	0	0		0	0	0	0	0
3.14176	0	0		0	0.02607	0	0	0
3.15843	0	0		0	0.02673	0	0	0
3.17511	0	0		0	0	0	3.67089	0
3.19178	0	0		0	0	0	3.76402	0
3.20845	0	0		5e-06	0	0	0	0
3.22512	1.2e-05	5.1e-05		1.4e-05	0	0	0	0
3.24179	1.3e-05	9.4e-05		0.52737	0	0	0	0
3.25847	0	0.000133		0.54074	0	0	0	0
3.27514	0	2.1e-05		1.1e-05	0	0	0	0
3.29181	0	3e-05		1e-05	0	0	0	0
3.30848	0	0		6.4e-05	0	0	0	0
3.32516	0	0		6.3e-05	0	0	0	0
3.34183	0	0		0	0	0	0	0
3.3585	4e-06	1e-05		0	0	0	0	0
3.37517	0	0		0	0	0	0	0
3.39185	0	4.1e-05		0	0	0	0	0
3.40852	0	4.7e-05		0	0	0	0	0
3.42519	4e-06	0		0	0	10.7847	0	0
3.44186	4e-06	9e-06		0	0	11.0583	0	0
3.45853	0	10.2019		0	0	0	0	0
3.47521	0	10.4606		4.5e-05	0	0	0	0
3.49188	0	0		2.1e-05	0	0	0	0
3.50855	0	0		4.9e-05	9.3e-05	0	0	0
3.52522	0	8.6e-05		2.6e-05	9.6e-05	0	0	0
3.54189	0	0		0	0	0	0	0
3.55857	0	3e-05		0	0	0	0	0
3.57524	0	8.3e-05		1.5538	0	0	0	0
3.59191	0	0		1.59325	0	0	8.2e-05	0
3.60858	0	0		6.6e-05	0	0	8.4e-05	0
3.62526	0	2.3e-05		5.2e-05	0	0	0	0
3.64193	0	0		0	0	0	0	0
3.6586	0	5e-06		0	0	0	0	0
3.67527	0	1e-05		0	0	0	0	0
3.69195	0	0		0	0	0	0	0
3.70862	0	2.6e-05		0.000166	0	0	0	0
3.72529	0	3.2e-05		0.000174	0	0	0	0
3.74196	0	0		0	0	0	0	0
3.75863	0	6e-06		0	0	0	0	0
3.77531	0	2e-06		0	0	0	0	0
3.79198	0	0		2.15433	0	0	0	0
3.80865	3.9e-05	8e-06		2.20905	0	0	0	0
3.82532	5e-05	9e-06		7e-05	0	0	0	0
3.842	0	0		0	0	0	0.000521	0
3.85867	0	0		9e-06	0	0	0.000534	0
3.87534	0	0		2e-06	0	0.000292	0	0
3.89201	0	0		8e-06	0	0.000299	0	0
3.90868	0	0		2e-06	0	0	0	0
3.92536	0	5.5e-05		4e-06	0	0	0	0
3.94203	0	5.6e-05		0	0	0	0	0
3.9587	0	0		2e-06	0	0	0	0
3.97537	1.8e-05	0		1.9e-05	0	0	0.000188	0
3.99204	0	0		1.3e-05	0	0	0.000193	0
4.00872	0	1.1e-05		0	0	0	0	0
4.02539	0	0		8e-06	0	0	0	0
4.04206	1.6e-05	0		1.6e-05	0	0	0	0
4.05873	1.7e-05	5e-06		0	0	0	0	0
4.0754	0	1.2e-05		3e-06	0	0	0	0
4.09208	0	5e-06		0	0	0	0	0
4.10875	0	3e-06		4e-06	0	0	0	0
4.12542	0	5.2e-05		6e-06	0	0	0	0
4.14209	0	5.1e-05		0	0	0	0	0
4.15876	0	0		0	0	0	0.000149	0
4.17544	0	4.2e-05		2.9e-05	0	0	0.000153	0
4.19211	0	7e-05		3e-05	0	0.000132	0	0
4.20878	0	8.3e-05		3e-06	0	0.000135	0	0
4.22545	1.3e-05	0		2.8e-05	0	0	0	0
4.24212	4.6e-05	0		4e-05	0	0	0	0
4.2588	0	0		1.6e-05	0	0	0	0
4.27547	0	0		0	0	0	0.000113	0
4.29214	0	0		0	0	0	0.000116	0
4.30881	0	0		1.8e-05	0	0	0	0
4.32548	3.5e-05	0		0	0	0	3.1e-05	0
4.34216	3.6e-05	1.4e-05		0	0	0	9.7e-05	0
4.35883	7e-06	0		0	0	0	0	0
4.3755	8e-06	1.2e-05		0	0	0	0	0
4.39217	0	9e-06		3.31407	0	3.62185	0	0
4.40884	0	0		3.39815	0	3.71373	0	0
4.42552	0	0		0	0	0	0	0
4.44282	0	1.9e-05		0	0	0	5.46787	0
4.45949	2.2e-05	2e-05		0	0	0	12.3438	0
4.47617	0	0		0	0.71842	0	7.02114	0
4.49284	0	0		0	0.73664	0	0.11587	0
4.50951	0	0		0	0	0	0	0
4.52618	2.5e-05	0.000106		3.3e-05	0	0	0	0
4.54286	0	0		7e-06	0	0	0	0
4.55953	2.7e-05	0		2e-06	0	0.32493	6.6e-05	0
4.5762	2.8e-05	0		0	0	0.33318	6.8e-05	0
4.59287	0	4.7e-05		0	0	0	0	0
4.60954	0	4.9e-05		0	0	0	0	0
4.62622	0	3.5e-05		0	0	0	0	0
4.64289	0	0		6e-06	0	0	0	0
4.65956	8e-06	0		3e-05	0	0	0	0
4.67623	8e-06	0.000151		4.3e-05	0	0.000259	0	0
4.6929	0	0.000155		1.5e-05	0	0.000266	0	0
4.70957	0	0		7.5e-05	0	0	0	0
4.72625	0	0		0.000114	0	0	0	0
4.74292	0	6e-06		8e-06	0	0	0	0
4.75959	0	6e-06		0	0	0	8.4e-05	0
4.77626	0	5e-06		2.9e-05	0	0	8.6e-05	0
4.79293	0	3.9e-05		3.4e-05	0	0	0	0
4.80961	0	3.3e-05		0	0	0	0	0
4.82628	0	0		0	0	0	0	0
4.84295	0	4.8e-05		0	0	0	0	0
4.85962	1.8e-05	0		0	0	0	0	0
4.87629	0	3.2e-05		0	0	0	0.000133	0
4.89296	0	3.2e-05		2e-05	0	0	0.000136	0
4.90964	9e-06	2.2e-05		2.6e-05	0	0	0	0
4.92631	0	0		0	0	0	4.60219	0
4.94298	0	2.2e-05		0	0	0	4.71894	0
4.95965	0	3.5e-05		0	0	0	0	0
4.97633	1e-05	0		0	0	0	0	0
4.993	0	0		0	0	0	0	0
5.00967	0	0		2.9e-05	0	0	7.8e-05	0
5.02634	0	0		0	0	0	7.9e-05	0
5.04301	0	0		0	0	0	8e-05	0
5.05969	0	1.8e-05		0	0	0	0.000103	0
5.07636	0	0.000123		0	0	0	0	0
5.09303	0	0		1e-05	0	0	0	0
5.10971	4.8e-05	0		1e-05	0	0	3.68658	0
5.12638	4.9e-05	0		0	0	0	3.78011	0
5.14305	0	5.8e-05		0	0	0	5.5e-05	0
5.15972	0	0.000129		0	0	0	0.000119	0
5.1764	0	0		0	0	0	0	0
5.19307	6.4e-05	0		0	0	0	0	0
5.20974	6.5e-05	0		0	0	0	0	0
5.22641	0	0		0	0	0	0	0
5.24308	0	0		4e-06	0	0	0.73006	0
5.25976	0	1e-05		0	0	0	1.86737	0
5.27643	0	2.6e-05		0	0	0	1.14717	0
5.2931	0	5.6e-05		0	0	0	0	0
5.30977	0	5.9e-05		0	0	0	0	0
5.32644	0	1e-05		3e-06	0	0	0	0
5.34312	0	0		3e-06	0	0	0	0
5.35979	0	3.9e-05		3e-06	0	0	0	0
5.37646	0	4.5e-05		4e-06	0	0	0	0
5.39313	0	0		0	0	0	0	0
5.4098	0	3.3e-05		8e-06	0	0	0	0
5.42648	0	0		1.37531	0	0	0	0
5.44315	0	0		1.41019	0	0	0.34545	0
5.45982	0	0.16988		1.3e-05	0	0	0.35421	0
5.47649	0	0.1744		5e-06	0	0	0	0
5.49316	0	0		0	0	0	0	0
5.50984	0	0		0	0	0	0	0
5.52651	1.2e-05	1.9e-05		0	0	0	0	0
5.54318	1.3e-05	0		0	0	0	0	0
5.55985	0	0		0	0	0	0	0
5.57652	0	0		0	0	0	0	0
5.5932	0	0		0	0	0	0	0
5.60987	0	0		0	0	0	0	0
5.62654	0	0		0	0	0	0	0
5.64321	0	0		4e-06	0	0	0	0
5.65988	0	0		4e-06	0	0	0	0
5.67656	0	0		0	0	0	0	0
5.69323	0	0		0.000103	0	0	0	0
5.7099	0	2.2e-05		0.000107	0	0	0	0
5.72657	1.3e-05	2.3e-05		0	0	0	0	0
5.74324	1.3e-05	0		0	0	0	0	0
5.75991	0	0		2.7e-05	0	0	4.31349	0
5.77659	4e-06	0		2.43612	0	0	10.5185	0
5.79326	0	4.2e-05		2.49789	0	0	6.27837	0
5.80993	0	0		7.7e-05	0	0	0	0
5.8266	0	0		13.3317	0	0	1.97611	0
5.84327	0	0		20.6067	0	0	3.11569	0
5.85994	0	9e-05		10.549	0	0	2.84628	0
5.87662	2.4e-05	5.6e-05		3.52325	0	0	1.77306	0
5.89329	0	0		0	0	0	0	0
5.90996	0	1.8e-05		4e-05	0	0	1.41754	0
5.92663	0	1.9e-05		13.4696	0	0	1.4535	0
5.94331	0	0		18.2653	0	0	0	0
5.95998	0	0		4.56695	0	0	2.78522	0
5.97665	0	0		0.68173	0	0	2.85588	0
5.99332	0	0		0.69903	0	0	0	0
6.01	1.3e-05	5e-06		0	0.000455	0.00024	0	0
6.02667	0	1e-05		0	0.000467	0.28081	0	0
6.04334	0	0		0	0	0.28768	0	0
6.06001	0	0		0	0	0	0	0
6.07668	0	0		0	0	0	0	0
6.09336	0	0		0	0	0	0	0
6.11003	0	0		0.4128	0	0	0	0
6.1267	0	0		0.42327	0	0	0	0
6.14337	0	0		0.00011	0	0	0	0
6.16004	0	0		0.000105	0	0	0	0
6.17672	0.00012	0		0	0	0	0	0
6.19339	0.000123	0		7.11521	0	0	0	0
6.21006	0	4.1e-05		7.29572	0	0	0	0
6.22673	2e-05	4.6e-05		6e-06	0	0	0	0
6.24341	2e-05	0.000104		6e-06	0	0	0.0001	0
6.26008	0	0.000113		0	0	0	0.000103	0
6.27675	0.000131	4.2e-05		1.4e-05	0	0	0	0
6.29342	0.000241	0		4.9e-05	0	0	0	0
6.31009	8.9e-05	0		3e-05	0	0	0	0
6.32677	0	0		0	0	0	0	0
6.34344	0	7e-06		0	0	0	0	0
6.36011	0	0		0	0	0	0	0
6.37678	0	0		0	0	0	0	0
6.39346	0	0		7e-06	0	0	0	0
6.41013	0	3.3e-05		0	0	0	0	0
6.4268	4.5e-05	0		0	0	0	0	0
6.44347	4.6e-05	0		4.3e-05	0	0	0	0
6.46015	0	1.4e-05		5e-05	0.000188	0	2.52595	0
6.47682	2e-06	5e-06		0	0.000193	0	3.00964	0
6.49349	6e-06	2.9e-05		1.6e-05	0	0	3.90106	0
6.51016	0	0		1.7e-05	0	0	3.55885	0
6.52683	0	0		5.6e-05	0	0	0	0
6.54351	0	1.6e-05		2.1e-05	0	0	0	0
6.56018	0	1.6e-05		0	0	0	0	0
6.57685	0	0		0	0	0	0	0
6.59352	0	0		5.3e-05	0	0	8.8e-05	0
6.6102	0	0		8e-05	0	0	9e-05	0
6.62687	0	0		2.80946	0	0	0	0
6.64354	2.4e-05	4e-05		5.85053	0	0	0	0
6.66021	0	0		15.2454	0	0	9.3e-05	0
6.67688	1.1e-05	0		14.7143	0	0	9.6e-05	0
6.69356	3e-05	3e-05		2.26055	0	0	8.1e-05	0
6.71023	0	5.3e-05		0.33593	0	0	0.000108	0
6.7269	0.000133	2.8e-05		0.34459	0	0	0	0
6.74357	0.000143	0		0	0	0	0	0
6.76025	6e-06	0		7e-06	0	0	0	0
6.77692	2e-05	6.6e-05		3e-05	0	0	0	0
6.79359	0	6.8e-05		1e-05	0	0	4.9e-05	0
6.81026	0	0		3.9e-05	0	0	0.000204	0
6.82693	0	1.8e-05		0	0	0	0.000144	0
6.84361	0	0		3.3151	0	0	3.5e-05	0
6.86028	0	0.000156		3.39921	0	0	0.000116	0
6.87695	0	0.000153		4.6e-05	0	0	0.000119	0
6.89362	0	9.3e-05		2.6e-05	0	0	0	0
6.9103	0	0.000131		9e-06	0	0	0.00015	0
6.92697	1.1e-05	1.1e-05		0	1.1846	0	0.000154	0
6.94364	8.4e-05	0		0	1.21465	0	0	0
6.96031	0	3.1e-05		0	0	0	0	0
6.97698	0	0		0	0	0	0	0
6.99366	1.2e-05	2.7e-05		0	0	0	7.4e-05	0
7.01033	0	0		0	0	0	7.6e-05	0
7.027	0	0		0.37149	0	0	0	0
7.04367	0	0		14.968	0	0	0	0
7.06035	0	0		14.9571	0	0	0	0
7.07702	0	4.5e-05		0	0	0	0	0
7.09369	0	2.7e-05		4e-06	0	0.000105	0.000121	0
7.11036	0	8e-06		4e-06	0	0.000108	0.000124	0
7.12704	0	1.2e-05		0	0.000277	0	0	0
7.14371	0	0		0	0.000284	0	0	0
7.16038	0	0		3.8e-05	0	0	0	0
7.17705	0	0		9.6e-05	0	0	0	0
7.19372	0	0		0	0	0.000138	0.00017	0
7.2104	0	9.4e-05		0.02232	0	0.000142	0.000175	0
7.22707	0	0		0.02329	0	0	0	0
7.24374	0	0		0	0	0	0.02449	0
7.26041	0	7e-06		0	0	0	0.02521	0
7.27708	0	8e-06		0.4925	0	0	0	0
7.29376	0	4e-06		0.50499	0	0	0	0
7.31043	0	1.6e-05		0	0	0	0	2.54776
7.3271	5e-06	1.3e-05		0	0	0	0	2.61239
7.34377	6e-06	0		3.25505	0	0	0	0
7.36044	3e-06	1.8e-05		10.2897	0	0	0.87153	0
7.37711	4e-06	1.7e-05		23.7531	0	0	0.89372	0
7.39378	0	0		17.6234	0	0	7.8e-05	0
7.41046	0	0		2.43681	0	0	0	0
7.42713	0	5e-05		2e-05	0	0	0	0
7.4438	0	0.25376		1.23696	0	0	0	0
7.46047	0	0.2602		1.26834	0	0	0	0
7.47714	0	0		4.48349	0	0	0.000254	0
7.49382	0	5.3e-05		4.59735	0	0	0.00026	0
7.51049	0	0		3e-05	0	0	0	0
7.52716	1.9e-05	4.2e-05		6.8e-05	0	0	0	0
7.54383	0	4.3e-05		0.000138	0	0	6.9e-05	0
7.5605	0	0		0	0	0	2.1076	0
7.57718	0	0		1.2e-05	0	0	2.16103	0
7.59385	0	0		0	0.000158	0	5.5e-05	0
7.61052	0	3.7e-05		0	0.000162	0	0	0
7.62719	0	4.67669		0	0	0	0	0
7.64386	0	4.79538		0	0	0.71241	3.16914	0
7.66054	3e-06	3.5e-05		19.1296	0	2.61694	3.24954	0
7.67721	3e-06	0		24.9954	0	1.93446	13.2876	0
7.69388	0	0		5.51698	0	0.000155	13.6247	0
7.71055	4e-06	0		26.9228	0	0	0	0
7.72723	0	0		63.7679	0	0	0	0
7.7439	0	1.2e-05		30.3148	0	0	0	0
7.76057	0	0		0.02499	0	0	0.000127	0
7.77724	0	0		2.51489	0	0	0.00013	0
7.79392	0	0		2.57906	0	0	0	0
7.81059	0	0		3.13073	0	0	0	0
7.82726	0	0		4.15911	0	0	0	0
7.84393	0	0		0.97311	0	0	0	0
7.86061	0	3.2e-05		4e-06	0	0	0	0
7.87728	0	0		4.9e-05	0	0	0	0
7.89395	1.4e-05	0		0	0	0	0	0
7.91062	2.6e-05	0		1.3e-05	0	0	0	0
7.9273	8e-06	1.9e-05		2.4e-05	0	0	0	0
7.94397	0	3e-06		1.1e-05	0	0	0	3.37155
7.96064	0	0		1.1e-05	0	0	0	3.45708
7.97731	0	0		0	0	0	0	0
7.99398	0	0		1.8e-05	0	0	0	0
8.01066	0	1.3e-05		1.8e-05	0	0	0	0
8.02733	9e-06	7.5e-05		0.83627	4.47657	0	0	0
8.044	0	0.000126		25.6786	4.59013	0	0	0
8.06067	0	5.9e-05		25.4508	0	0	0	18.1999
8.07734	0	0		0	0	0	0	18.6616
8.09402	0	2e-06		0	0	0	0	0
8.11069	0	1.8e-05		0	0	0	0.33857	0
8.12736	0	0		0	0	0	0.34743	0
8.14403	0	0		0.59475	0	0	0.000335	0
8.16071	6e-06	10.1894		10.9136	0	3.39052	0	0
8.17738	7e-06	12.6552		18.5677	0	3.47654	0	0
8.19405	0	2.26315		13.722	0	0	0	0
8.21072	0	0		5.80793	0	0	0	0
8.22739	0	0		7.6e-05	0	0	0	0
8.24407	0	0.000119		0	0	0	0	0
8.26074	0	2.2e-05		15.5498	0	0	0	0
8.27741	0	0		20.3991	0.000166	0	0	0
8.29408	0	1e-05		4.56799	0.00017	0	0	0
8.31075	0	0		7.6e-05	0	0	0	0
8.32742	1e-05	0		4.2e-05	0	0	0	0
8.3441	1e-05	9e-06		24.8943	0	0	0	0
8.36077	0	2.6e-05		29.9983	0	0	0	0
8.37744	0	1.5e-05		4.58609	0	0	0	0
8.39411	0	2.9e-05		0	0	0	0	0
8.41078	2.9e-05	4.77116		0	0	0	0	0
8.42746	2.9e-05	4.89212		0.000105	0	0	0	0
8.44413	0	2.6e-05		0	0	0	0	0
8.4608	4.1e-05	0		0.82989	0	0	0	0
8.47747	5.9e-05	1.4e-05		1.78129	0	0	3.19091	0
8.49414	0	1.4e-05		3.34009	0	0	3.27186	0
8.51081	0	7.1e-05		45.7748	0	0	0	0
8.52748	0	7.6e-05		50.313	0	0	0	0
8.54416	0	0		17.986	0	0	0	0
8.56083	6e-06	1.4e-05		18.1577	0	0	0	0
8.5775	6e-06	7e-06		17.8094	0	0	0	0
8.59417	0	0		25.5661	0	3.91011	0	0
8.61084	4.9e-05	1.88073		23.0755	0	4.0093	0	0
8.62752	5.4e-05	6.38262		6.88506	0	0	0	0
8.64419	0	6.09587		0.37371	0	0	0	0
8.66086	0	1.56748		0.38316	0	0	0	0
8.67753	0	0		0	0	0	0	0
8.69421	1.2e-05	0		0	2.12775	0	0	0
8.71088	0	0		3.09936	2.18173	0	0	0.73959
8.72755	0	0		7.82818	0	0	0	0.75835
8.74422	0	3e-06		4.76817	0	0	0	0
8.76089	0	8.5e-05		13.6845	0	0	0	0
8.77756	0	7.42158		14.3368	0	0	0	0
8.79424	0	7.60993		0.31275	2.88406	0	0	0
8.81091	0	3.91542		0	2.95723	0	0	0
8.82758	0	4.01475		0	0	0	5.637	0
8.84425	0	4.6e-05		4.9e-05	0	0	5.78	0
8.86093	0	0		6.2e-05	0	0	0	0
8.8776	0	0		0	0	0	0	0
8.89427	0	6e-06		0	0	0	0	0
8.91094	0	2e-06		26.4857	0	0	0	0
8.92761	1.2e-05	1.9e-05		27.1576	0	0	0	0
8.94429	0	0.95109		0	0	0	0	0
8.96096	0	0.97521		0	0	5.3e-05	0.000213	0
8.97763	0	0		0.000141	0	5.4e-05	0.000218	0
8.9943	8.83424	0		0.000144	0	0	0	0
9.01098	9.05822	0		0	0	0	0	0
9.02765	0	0		0.000124	0	0	0	0
9.04432	0	0.000131		7.57604	0	0	0	0
9.06099	7e-06	0		7.76824	0	0	0	0
9.07766	0	0		2.9e-05	0	0	0.000115	0
9.09434	0	0		0.000115	0	0	0.000118	0
9.11101	0	1.3e-05		0.000142	0	0	3.5e-05	0
9.12768	0	1.3e-05		0	0	0	6.7e-05	0
9.14435	0	2.6e-05		0	0.000175	0	0	0
9.16103	0	2.3e-05		3.1e-05	0.000179	0.000461	0	0
9.1777	0	0		4.3e-05	11.7719	0.000472	0.000282	0
9.19437	0	0		0	12.0705	0	0.000289	0
9.21104	3.7e-05	8.4e-05		0	0	0	0	0
9.22771	0	0		6.26588	0	0	0	0
9.24439	0	0.000101		6.42484	0	0	0.000113	0
9.26106	0	1.71838		0	0	0	0	0
9.27773	0	1.76191		0	0	0	0.000153	0
9.2944	0	0		0	0	0	0.00022	0
9.31107	3.8e-05	3.1e-05		0	0	0	0	0
9.32775	0	3.8e-05		4e-06	0	0	0	0
9.34442	0	6.6e-05		4e-06	2.80896	0	0	0
9.36109	0	8e-06		2.94223	2.88022	0	0	0
9.37776	0	2.6e-05		5.13265	0	0	0	0
9.39443	6.9e-05	2.7e-05		19.1696	0	0	0	0
9.41111	0	0		17.4315	0	0.000166	0	0
9.42778	0	3.6e-05		0	0	0.00017	0	0
9.44445	0	2.2e-05		9.1e-05	0	0	0	0
9.46112	0	0		12.4881	0	0	9e-05	0
9.47779	0	0		24.5849	0	0	9.2e-05	0
9.49446	0	0		12.0789	0.000134	0	0	0
9.51114	0	0		3e-05	0.000138	0	0.000277	0
9.52781	0	0		1.3e-05	0	0	0.000335	0
9.54448	9e-06	0		3.5e-05	0	0	0	0
9.56115	29.0542	10.572		0	0	0	0	0
9.57783	85.308	14.0167		1.4e-05	0	0	0	0
9.5945	129.067	3.25715		3e-05	0	0	0	0
9.61117	233.12	0.000251		0.000113	0.000184	0	0	0
9.62784	468.871	0		9.2e-05	0.000189	0	0	0
9.64451	1068.91	5.2e-05		0	0	0	0	0
9.66119	2579.52	7.4e-05		0.00035	0	0	0	0
9.67786	5408.01	4.8e-05		0.000353	0	0	0.000139	0
9.69453	9426.98	2e-05		0	0	0	0.000143	0
9.7112	15016.3	1.3e-05		0	0	0	0	0
9.72787	23891.4	0		1.4e-05	0	0	0	0
9.74455	33985.2	9e-06		0	1.3e-05	0	0	0
9.76122	45746.9	1.6e-05		6.08	1.3e-05	0	0	0
9.77789	55221.4	0		6.23423	0	0.000128	3.371	0
9.79456	55211.6	0		1.02253	0.000149	0.000132	3.45652	0
9.81123	55700.3	0		1.04847	0	0	5.5e-05	0
9.82791	56750.4	4e-05		0	0	0	5.7e-05	0
9.84458	46994.2	2.3e-05		5.3e-05	0	0	0	0
9.86125	35075.1	6.8e-05		6.1e-05	0	0	0	0.13018
9.87792	24360.4	7.3e-05		2.9e-05	0	0	0	0.13348
9.89459	16164	0		3.6e-05	0	0	0.000216	0
9.91127	11697.7	0		0	0	0	0.000221	0
9.92794	5701.58	2.5e-05		0	0	0	0	0
9.94461	4363.14	1.3e-05		1.2e-05	0	0	0	0
9.96128	3118.47	0		0	0	0	0	0
9.97795	1270.01	0		0	21.7154	0	0	0
9.99463	1152.16	0		0	59.4767	0	0	0
10.0113	644.332	1.2e-05		5e-06	55.5628	0	0	0
10.028	550.543	1.3e-05		19.4051	63.6583	0	0	0
10.0447	412.288	10.1703		29.0418	153.367	0	0	0
10.0613	374.233	10.4282		34.9237	182.641	0	0	0
10.078	233.424	0		23.6545	109.844	0	0	0
10.0947	231.055	0		5.36236	126.69	0	0	0
10.1113	197.446	8.1e-05		5.49839	113.647	0	0	0
10.128	84.3026	6e-06		10.0875	32.4904	0	0	0
10.1447	82.4118	0.00013		10.3434	52.3434	0	0	0
10.1614	116.349	0		0	84.2172	0	0	0
10.178	131.353	0		1.6e-05	35.6636	0	0	0
10.1947	139.555	0		0	43.0425	0	0	0
10.2114	149.679	0		1.4e-05	34.4596	0	0	0
10.228	125.505	0		0	0	0	0.000146	0
10.2447	83.004	0		0	0	0	0.00015	0
10.2614	72.509	9.8e-05		0	0	0	0	0
10.2781	131.212	0		0	0	0	0	0
10.2947	153.652	0		18.8133	0	0	0	5.46278
10.3114	101.686	0.95021		19.2906	0	5.49261	0	5.60137
10.3281	72.4848	0.9743		37.7472	0	5.63195	0	0
10.3447	58.5395	15.1904		44.5243	0	0	0	0
10.3614	64.5839	45.859		21.4501	0	0	0	0
10.3781	48.2026	109.274		15.3485	0	0	0	0
10.3948	53.1104	271.737		0	0	0.000211	0	0
10.4114	99.603	429.536		11.5286	0	0.000216	0	0
10.4281	98.2338	680.298		30.7968	0	0	0	0
10.4448	54.4045	1696.48		23.9229	0	0	0	0
10.4614	52.4357	3519.2		4.57911	0	0	0	0
10.4781	64.0115	6971.77		0	0	0	0	0.81253
10.4948	32.672	13258.5		0.000112	0	0	8.1e-05	0.83314
10.5115	398.964	23390.7		0.00014	0	0	0.000143	0
10.5281	436.017	39072.3		0	0	0	3.9e-05	0
10.5448	24.7012	55800.2		3.2e-05	0	0	0	18.244
10.5615	14.288	72704.4		0	0	0	6.44329	38.9731
10.5782	2.61009	93413.5		0	0	0	18.9841	35.4379
10.5948	1.7e-05	112348		0	0	0	21.3624	25.2629
10.6115	6.50975	121561		6.87343	0	0	16.5678	45.8491
10.6282	15.3453	110931		7.04779	0	0	10.5337	45.9366
10.6448	24.6212	95578.7		0	0	0	2.72971	10.0537
10.6615	16.1452	89411.5		0	0	0	0.0484	5.23036
10.6782	0.000317	71854.2		4.06187	0	0	2.51968	9.15183
10.6949	22.0084	52980.1		49.4027	0	0	2.5836	6.72081
10.7115	26.7877	40556		69.6273	0	0	2.61265	0
10.7282	4.91882	28667.2		50.9702	0	0	2.67908	0
10.7449	0.60575	26284		117.599	0	0	0.000266	0
10.7615	0		27403.9	258.391	0	0	9e-05	0
10.7782	29.5064		35040.7	437.403	0	0	9.2e-05	3.39678
10.7949	30.2549		54161.2	936.018	2.37722	0	0	35.5283
10.8116	5.75847		85498.7	2117.25	12.6788	0	0	64.9108
10.8282	5.91593		120571	4747.8	93.7944	0	22.9095	77.0286
10.8449	7.52419		151415	7889.04	171.142	0	32.2437	73.1323
10.8616	12.1385		180469	11699.9	217.868	0	10.4797	64.7033
10.8782	13.9773		209132	18496.3	380.177	0	4.80192	69.0934
10.8949	9.68116		193886	24888.3	855.247	0	3.37288	108.861
10.9116	0		164952	29137.7	1520.6	0	9.9e-05	97.3311
10.9283	0		161433	37521.8	2509.26	0	0.000139	49.9178
10.9449	0		125313	45555.4	5385.66	0.76235	0	46.0433
10.9616	9e-06		93766.3	45825.2	9902.4	0.78169	0	38.3615
10.9783	9e-06		70681.8	44381.6	15065.5	0	0.000116	12.9905
10.995	18.472		45155.9	41042.6	24003.6	0	0.000119	2.91443
11.0116	20.0699		34132.4	34406.4	33985	10.2591	0	13.8688
11.0283	1.15795		21892.3	27998	40433.8	10.5194	0	11.4438
11.045	1.7e-05		13808.4	19897.9	50620.1	0	0	2.19528
11.0616	0		7812.32	12728.5	60393.6	0	0	0
11.0783	0		4914.16	8690.79	60999.8	1.65233	0	0
11.095	7e-06		3309.5	5687.68	52784.2	1.69425	0.000143	0
11.1117	0		2196.12	4052.18	49866.1	0	0.000147	0
11.1283	0		1595.62	2556.43	49730.3	0	1.3e-05	0
11.145	0		999.144	1274.88	41038.4	0	5.3e-05	0
11.1617	0		701.501	937.64	36213.2	0	0	0
11.1784	0		669.22	645.389	28023	0	0	0
11.195	0		657.81	466.02	19611	1.57054	0	0
11.2117	0		769.718	385.813	15842.3	1.61038	0.000101	0
11.2284	6e-06		731.152	314.691	11128.9	0	0.000104	0
11.2455	0		498.5	161.398	7652.12	0	0	0
11.2622	0		443.357	208.37	4552.57	0	0	0
11.2789	2.50957		526.007	199.438	3706.76	0	0	0
11.2956	2.57326		492.844	193.565	2576.61	0	0	0
11.3122	0.00012		322.025	187.993	1559.88	0	0.000144	0
11.3289	9.6e-05		265.673	113.874	1040.84	0	0.000148	2.6882
11.3456	0		317.117	100.777	651.476	0	0	2.7564
11.3622	0		350.448	112.991	504.276	0	0	0
11.3789	0		374.152	135.279	438.501	0	0.000107	0
11.3956	2e-05		411.143	130.472	360.851	0	0.00011	0
11.4123	0		302.019	115.17	281.673	0	0	0
11.4289	1.6e-05		199.41	76.7875	319.912	0	0	0
11.4456	0		270.947	53.4729	255.615	0	0	0
11.4623	0		262.533	61.879	179.418	0	0	0
11.4789	0		212.215	71.2347	222.992	1.8447	0	0
11.4956	0		230.436	51.7958	286.153	1.89149	0	0
11.5123	0		212.469	25.7925	203.144	0	0	0
11.529	2.2e-05		204.757	41.03	110.734	0	0	0
11.5456	2.2e-05		184.933	58.8756	117.373	0	0	0
11.5623	0		119.249	46.0123	141.248	0	0	0
11.579	0		99.1973	19.4587	141.828	12.4116	0	0
11.5956	0		130.627	24.462	78.6089	12.7265	0.000108	0
11.6123	0		141.52	15.3753	37.3537	0.000185	0.000111	0
11.629	4e-06		166.404	6.5457	53.5621	0.000189	1.84765	0
11.6457	2.6e-05		169.38	27.0781	100.716	0	1.89452	0
11.6623	2.1e-05		90.3627	20.8831	121.703	6.07663	0	0
11.679	0		99.4357	2.17894	127.735	6.23079	0	0
11.6957	0		121.257	2.23434	112.471	0.65142	0	0
11.7124	1.4e-05		110.184	11.8817	54.3974	23.5196	0	0
11.729	0		104.864	22.3668	25.256	54.4174	0	0
11.7457	0		111.402	13.8057	43.5668	59.9142	1.70234	0
11.7624	0.000128		84.2677	9.7012	42.6242	80.7228	1.74553	0
11.779	0.000132		66.6234	6.46452	8.62897	93.317	0	0
11.7957	0		107.766	7.76447	38.8425	86.9384	0	0
11.8124	5.7e-05		85.0682	7.96145	52.733	147.066	0	0
11.8291	0		106.747	0	58.921	189.194	0	0
11.8457	5.9e-05		93.9575	8.12143	51.9063	346.013	0	0
11.8624	6e-05		77.8892	34.6994	15.7514	541.809	0	0
11.8791	0		57.1746	27.0498	14.6231	684.482	0	0
11.8957	0		38.4993	0	25.3988	839.299	0	0
11.9124	0		51.5798	0	34.3655	1136.96	0	0
11.9291	4e-06		26.7273	31.5498	13.6511	1835.01	0	0
11.9458	0		45.3813	34.2236	3.31425	2181.88	7.2e-05	0
11.9624	0		57.6878	5.30742	28.5472	2720.33	7.4e-05	0
11.9791	0		40.0373	5.16745	39.548	3984.33	0	0
11.9958	0		50.6722	1.75299	10.5825	4115.99	4e-05	0
12.0124	0		71.6533	2.16745	17.0602	5008.89	0.000279	0
12.0291	0		51.8783	20.9871	36.9921	7488.18	0.000171	0
12.0458	0		38.6505	29.3438	17.1416	8808.99	0.96091	0
12.0625	0		25.9636	14.4972	1.17161	9992.83	0.98529	0
12.0791	1.7e-05		32.4713	23.7375	2.34507	12539	11.5606	0
12.0958	0		91.8037	20.9211	11.4261	15386	11.8539	0
12.1125	0		92.6769	0.09061	25.3206	16768	0.000264	0
12.1291	0		51.152	0	47.1672	18132.3	0.000141	0
12.1458	2.32296		39.5149	1.9e-05	48.206	19245.4	0.000121	0
12.1625	2.38189		59.0992	0	14.3321	19529.5	0.000161	0
12.1792	0		48.1834	1.1e-05	1.45906	22245.7	0	0
12.1958	0.000147		10.5584	9.71138	0	24766.9	0	0
12.2125	3e-06		26.2729	11.2921	3.86062	24169.5	0	0
12.2292	0		27.4494	1.36826	34.1423	25441	0	0.000185
12.2459	0		19.0574	19.6332	46.583	28004.4	0	0.00019
12.2625	0		24.4623	27.7854	15.9831	27136.2	0	0
12.2792	0		16.8408	10.3654	13.2535	27166.3	0.000259	0
12.2959	7.22352		35.0603	2.581	28.4063	25526.4	0.000266	5.262
12.3125	7.40677		52.6257	10.6512	15.87	20964.7	0	5.39549
12.3292	0		25.3368	10.9215	0.69472	23641.6	0	0
12.3459	0		19.5882	1.9e-05	13.9725	24166.3	0	0
12.3626	0		19.0406	0	48.6675	19499.2	0	0
12.3792	4.5e-05		7.29742	0	39.4067	21370.4	0	0
12.3959	0		10.0481	3.03263	8.78281	20530.8	0.000219	0
12.4126	0		30.547	3.10964	4.64289	15936.5	0.000224	0
12.4292	0		25.9637	0	0	15038.9	0	0
12.4459	0		14.5748	0	5.35469	13575.9	0	0
12.4626	0		43.6461	0	19.4882	11876.9	0	0
12.4793	0		41.8719	4e-05	14.3499	11315.8	0	0
12.4959	0		16.5799	0	0	9467.98	29.9882	0
12.5126	0		11.7653	0	0	8222.9	31.3231	0
12.5293	8e-06		9.16463	0	1.92259	7586.93	0.58881	0
12.546	0		11.865	0	1.97136	6150.31	8.2e-05	0
12.5626	0		13.4808	5.96267	0	5488.64	0	0
12.5793	0		12.9332	6.11393	0	4675.85	0	0
12.596	0		25.3996	10.2078	0	4127.21	0	0
12.6127	0		31.8806	10.4667	0	3525.13	0.000337	0
12.6293	0		25.5718	0	0	2608.43	0.000346	0
12.646	0		10.4937	0.41915	0	2166.85	3.43539	0
12.6627	0		11.049	0.42978	0	1809.77	3.88103	0
12.6793	0		27.6594	0	0	1713.2	0.36742	0
12.696	0		26.0552	0	0	1475.5	0.000205	0
12.7127	1.5e-05		20.4176	0	0	1246.03	0	0
12.7294	1.6e-05		20.8221	4.7e-05	0	1003.08	0	6.60136
12.746	0		49.9346	0.42368	0	631.049	0	6.76883
12.7627	0		52.6616	0.4344	0	444.82	0	0
12.7794	0		36.807	9e-06	0	640.539	0	0
12.796	0		27.84	0	0	501.929	0	0
12.8127	0		13.1496	1.4e-05	0	283.427	1.7386	0
12.8294	5.3e-05		22.1502	1.9e-05	0	363.274	1.78271	0
12.8461	4.7e-05		25.4992	0	0	379.552	0	0
12.8627	0.25971		14.7077	0	0	239.639	0	0
12.8794	0.26671		19.1411	8e-06	6.10109	157.884	0.000247	0
12.8961	0		39.0734	9e-06	8.77598	121.959	0.000253	0
12.9128	0		22.5112	1e-06	19.4337	179.276	0	0
12.9294	0		29.1458	0.58033	17.2788	181.04	0	0
12.9461	7.3e-05		37.3516	0.59505	0	78.5107	0.000112	0
12.9628	5.8e-05		24.1626	9e-06	0	145.33	0.000565	0
12.9794	0		24.2582	9.22114	0	166.317	0.00043	0
12.9961	0		37.8184	9.45519	0	96.3647	0	0
13.0128	0		41.5389	3.839	0	74.8469	0	0
13.0295	0		16.4304	3.93626	0	70.6087	0	0
13.0461	0		5.67709	0	0	82.0555	0	0
13.0628	0		3.96493	1.4181	0	60.2197	0	0
13.0795	0		7.10373	5.29871	0	67.5614	0	0
13.0961	0		3.64709	3.94217	0	59.4043	0	0
13.1128	0		8.50655	0	0	61.0583	0	0
13.1295	0		8.01306	0	0	47.563	0	0
13.1462	0		5e-06	6.1e-05	0	25.8617	0	0
13.1628	0		2.4e-05	2.92922	0	60.9157	0	0
13.1795	0		2.5e-05	3.00354	0	57.7684	0	0
13.1962	8e-06		32.9007	0	2.41546	27.2073	0	0
13.2128	0		36.7462	0	2.47674	12.5213	0	0
13.2295	0		3.08721	1.4e-05	0	24.7294	0	0
13.2462	0		3.55692	1.4e-05	0	57.4185	0	0
13.2629	0		3.64718	0	0	40.685	0	0
13.2795	0		0.78452	0	0.06028	15.5777	0	0
13.2962	0		0.80439	2.6e-05	0.06181	25.3141	5.26542	0
13.3129	0		13.6418	0.000174	0	22.9357	8.33029	0
13.3295	0		20.0222	0.93593	0	31.2688	4.09603	0
13.3462	4.7e-05		8.49894	0.95967	0.6303	25.0398	20.7421	0
13.3629	4.8e-05		2.14111	0	0.64645	1.30438	20.1219	0
13.3796	3.4e-05		4.3e-05	0	0	2.48477	0	0.000125
13.3962	3.7e-05		3.79668	0	5.31523	1.89107	0	0.40022
13.4129	1.15283		13.3184	0	5.45026	1.04144	0	0.41025
13.4296	1.18208		32.6106	8e-06	0.000348	10.9179	0	0
13.4462	0		23.5047	2.1e-05	0.000116	14.4205	0	0
13.4629	0		0	2.1e-05	0	5.4731	0	0
13.4796	1.1e-05		0	0	0	21.1923	0	0
13.4963	1.1e-05		4.6e-05	6.8e-05	0	23.6234	0	0
13.5129	0		0	8.5e-05	0	4.07365	0	0
13.5296	0		0	5.3e-05	0	0	0	0
13.5463	0		0	4.3e-05	0	0	5.9e-05	0
13.563	0		0	5.5e-05	0	19.307	6e-05	0
13.5796	4e-06		0	0	0	31.058	0	0
13.5963	0		0	0	0	64.8279	0	0
13.613	0		2e-05	0	0	66.5537	0	0
13.6296	0		0	0	0	20.1801	0	0
13.6463	0		0.0002	0	0.32783	13.3451	0	0
13.663	0		9.447	1.6e-05	0.33614	16.7769	0.000114	0
13.6797	0		9.68647	1e-06	17.6652	17.7336	0.000248	0
13.6963	0		0	1.1e-05	29.1408	12.5931	7.15665	0
13.713	0		5.23785	11.3911	15.5816	0	21.5377	0
13.7297	0		5.37071	11.6801	4.43062	12.7131	19.1522	0
13.7464	0		0	3.7e-05	0	18.3444	13.3967	0
13.763	0		9e-06	4.5e-05	0	13.9703	31.0787	0
13.7797	0		0	2.7e-05	0	8.76241	34.7441	0
13.7964	0		0	7e-06	0	0.14848	50.8347	0
13.813	0		0	6e-06	7.9e-05	0	104.878	0
13.8297	0		0	1e-05	8.1e-05	2.86589	197.996	0
13.8464	0		2.5e-05	1.8e-05	10.4476	3.46712	273.439	0
13.8631	0		2.6e-05	2e-05	10.7127	0.54193	432.87	0
13.8797	0		0	0	0	0	793.126	0
13.8964	8.7e-05		2.30544	0	0	4.51093	1202.78	0
13.9131	8.9e-05		2.61379	1.3e-05	0	6.5972	1718.19	0
13.9298	0		0.25621	1.4e-05	0	2.02186	2539.38	0
13.9464	4.5e-05		1.2e-05	3e-06	2.48027	0	3631.82	0
13.9631	0		0	0.000108	17.9349	2.64915	5809.58	0
13.9798	0		1.6e-05	0	28.8103	2.71636	8470.74	0
13.9964	0		2.17638	0	17.8515	0	11129.1	0
14.0131	1.2e-05		11.2539	0	9.46752	0	13578.5	0
14.0298	1.2e-05		9.25121	0	4.98417	0	15764.5	0
14.0464	0		3.54974	3.1e-05	0	0	20092.2	0
14.0631	0		33.5769	0	0	0	24019.4	0
14.0798	0		44.9149	1.7e-05	0	3.51079	24734.8	0
14.0965	0		14.5792	4.1e-05	0	3.59986	26664.1	0
14.1131	0		17.3165	0	0	0	27919.5	0
14.1298	0		22.4616	0	0	0	25142.5	0
14.1465	0		4.82499	0	0	1.71102	23250.4	0
14.1631	0		15.8909	0	10.3116	1.75443	21899.3	0
14.1798	0		36.6682	0	10.5732	0	19819.8	0
14.1965	1.4e-05		27.0407	0	0	0	17565.3	0
14.2132	1.5e-05		17.0907	0	0	0	15676.8	0
14.2298	1.2e-05		11.0586	1.6e-05	0	0	13441.3	0
14.2465	1.2e-05		3.9e-05	1.7e-05	0	0	9703.85	0
14.2632	0		1.1e-05	0	0	0	7879.4	0
14.2799	3e-05		0.86043	2.2e-05	2.92013	6.93088	6784.34	0
14.2965	0		0.88226	4.3e-05	2.99421	7.10671	4724.04	0
14.3132	0		1.7e-05	1.7e-05	0	0	3790.81	0
14.3299	3.8e-05		13.6463	0	0	4.80447	3235.08	0
14.3466	3e-05		13.9925	0	0	7.92721	2037.58	0
14.3632	0		2.9e-05	0	0	6.87589	1532.21	0
14.3799	2e-06		4.7e-05	3.4e-05	2.2e-05	3.89528	1230.92	0
14.3966	0		4.5e-05	8e-06	2.2e-05	0	704.492	0
14.4132	0		8.1e-05	5e-05	0	0	611.447	0.91219
14.4299	0		5.6e-05	3.9e-05	0	0	596.975	0.93533
14.4466	4.6e-05		0	0	0	0	523.076	0
14.4633	0		0	1.9e-05	0.000224	0	326.619	0
14.4799	0		0	3e-05	14.7962	0	216.325	0
14.4966	0		1.5e-05	7e-06	15.1713	0	150.76	0
14.5133	0		0	8e-05	0	0	243.04	27.4076
14.5299	0		0	0.000107	0	0	262.194	30.8899
14.5466	0		3.6e-05	7e-06	0	0	187.575	4.79512
14.5633	0		4.3e-05	0	0	0	112.292	3.5467
14.58	0		1.1e-05	0	0	0	126.336	18.5214
14.5966	0		2e-05	0	0	0	136.116	51.5793
14.6133	0		0	3e-06	0	0	92.9343	40.5641
14.63	0		0	3e-06	0	0	63.0713	95.8187
14.6466	0		0	6.5e-05	0	0	79.7877	130.638
14.6633	0		1.2e-05	6.8e-05	11.8744	13.1456	79.6502	98.1524
14.68	0		4e-06	0	12.1756	13.479	76.4886	92.1495
14.6967	0		2.5e-05	0	0	0	72.217	115.904
14.7133	0		9.77101	1.6e-05	0	1.299	63.2276	157.423
14.73	0		10.0189	7e-06	0	1.33195	93.1561	202.951
14.7467	0		6.7515	8e-06	0	0	89.2721	290.734
14.7633	0		6.92277	2.9e-05	0	0	95.3549	419.193
14.78	0		0	3.6e-05	0	0	107.039	653.176
14.7967	0		3.89696	0	0	0	45.1493	1073.42
14.8134	0		3.99583	0	0	0	38.6925	1542.31
14.83	0		1.2e-05	0	0	0	69.808	2276.55
14.8467	7e-06		0	0.000258	0	0	49.491	3182.98
14.8634	0		0	0.000108	0	0	45.4514	4300.82
14.88	0		7.12623	2.4e-05	0.000164	0	55.0451	5684.89
14.8967	0		7.30725	0	0.000168	0	30.417	7017.67
14.9134	0		0	0	0	2.12791	65.3751	8532.32
14.9301	0		2.1e-05	0	0	2.18189	83.5746	9394.45
14.9467	0		10.3008	5e-06	0	20.5259	48.5625	11411.3
14.9634	0		10.5625	5e-06	0	21.0466	68.1176	13349.5
14.9801	0		0.000109	0	0	0	33.8673	12713.1
14.9968	0		0	0	0	0	18.6561	13404.2
15.0134	0		0	0	0	0	44.2536	13521.2
15.0301	5e-06		0	0	0	0	60.7789	12229.4
15.0468	6e-06		0	0	0	3.98824	44.8856	12917
15.0634	3.7e-05		0	2.4e-05	0	4.08942	34.0264	12130.2
15.0801	4e-05		0	4.4e-05	0	0	22.7609	9395.07
15.0968	0		0	0	0	0	29.1644	8318.15
15.1135	0.000124		0.000131	0	0	0.000176	56.2401	7823.67
15.1301	0.000127		0.000316	0	0	5.84262	52.4542	5908.87
15.1468	0		7.8e-05	0	0	18.6193	21.636	4849.3
15.1635	3.3e-05		0	0	0	16.9573	38.5944	4326.12
15.1801	0		7.72841	0	0	4.10998	67.8909	3559.11
15.1968	0		23.7077	0	0	0	32.3723	2730.62
15.2135	1.3e-05		16.1835	0	0	0	7.31251	1834.85
15.2302	1.3e-05		0	0	0	0	15.181	1738.05
15.2468	0		1.50665	3.5e-05	0	0	25.8905	1306.82
15.2635	0		1.54487	1e-06	0	0.000282	13.8525	930.009
15.2802	0		8e-06	2e-06	0	0.000289	18.2915	790.965
15.2968	0		2.3e-05	0	0	0	42.943	542.117
15.3135	1.1e-05		2.8e-05	8e-06	0	0	31.1529	393.146
15.3302	1.1e-05		2.1e-05	9e-06	0	0	8.76427	328.372
15.3469	8e-06		6e-06	6e-05	0	0	9.75539	253.662
15.3635	1.2e-05		0	6.2e-05	0	0	20.5376	214.16
15.3802	0		7.8e-05	0	0.12648	0	19.1043	201.964
15.3969	0		0.000167	8e-06	13.5016	0	11.5192	133.572
15.4136	0		0.0001	0	19.2747	0	5.39068	120.478
15.4302	0		2.96865	0	5.71597	0	11.3271	76.5466
15.4469	0		3.04393	2.2e-05	0	0	13.3904	61.9333
15.4636	0		5e-06	2.8e-05	0	0	4.30664	71.3745
15.4802	1.7e-05		3e-06	0	0	0	26.1525	63.2339
15.4969	1.7e-05		1e-06	1.7e-05	0	0	29.4636	59.5104
15.5136	0		0	0.000107	0	0	4.97557	83.6868
15.5303	0		0	8.5e-05	0	0	19.4474	79.0924
15.5469	0		0	0	0	0	19.9404	55.7635
15.5636	0		0	1.4e-05	0	0	0	42.2233
15.5803	0		0	3e-06	0	0	0	21.5194
15.5969	1e-05		0	0	0	0	27.4451	14.6972
15.6136	0		2.26146	12.2548	0	0	39.9777	10.8859
15.6303	1.3e-05		12.494	12.5657	0	0.96196	12.1366	24.9881
15.647	0		10.4335	1.4e-05	0	0.98637	0	29.2648
15.6636	4e-06		0	0	0	0	0.000213	38.209
15.6803	1.1e-05		0	0	0	0	0	34.2232
15.697	0		2e-06	4.8e-05	0	0	7.82596	25.9257
15.7136	0		6e-06	0.000105	0	0	8.02448	50.4655
15.7303	0		0	6.7e-05	0	0	10.7197	38.3631
15.747	0		3.6e-05	7e-06	0	0	10.9916	11.7665
15.7637	0		9.1e-05	0	0	0	26.0891	5.74726
15.7803	0		0	2.2e-05	0	0	36.9282	0.49829
15.797	0		1.3e-05	2.7e-05	0.000205	0	10.4358	15.4928
15.8137	0		6.4e-05	0	0.00021	0	0.000305	19.3558
15.8303	1.4e-05		0	0	0	0	0	9.66125
15.847	0		2.8e-05	8e-06	5.45106	0	0	6.21467
15.8637	0		6.3e-05	1.5e-05	5.58935	0	0	0
15.8804	0		2.13728	4e-06	0.000503	0	0	4.99489
15.897	5e-06		2.1915	0	0.000515	0	0	12.8841
15.9137	0.000122		2.49818	4e-06	4.4e-05	0	0	7.9594
15.9304	0.000132		2.56156	2e-06	0.00018	0	0	0
15.9471	0		3.1e-05	0	0	0	0	0
15.9637	0		2.7e-05	0	0	0	0	0.41145
15.9804	0		0	0	0	0	32.0722	0.42189
15.9971	0		0.000147	5.7e-05	0	0	32.8858	0
16.0137	0		0.000175	0	0	1.25207	0	0.54506
16.0304	8e-06		0	0	0	1.28383	0	2.19577
16.0471	0		8.4e-05	0	3.01902	0	0	1.67841
16.0637	0		7e-05	0	3.0956	0	0	0
16.0804	0		0	0	0	0	0	0
16.0971	0		9e-06	3e-06	0	0	2.42052	0
16.1138	0		9.8e-05	0	0.000119	0	2.48192	0
16.1304	0		8.3e-05	0	0.000122	4.41837	4e-05	0
16.1471	0		9e-06	7e-06	0	4.53046	5.00873	0
16.1638	0		2.1e-05	7e-06	0	0	13.5423	0
16.1805	0		0	8e-06	0	0	8.61983	0
16.1971	0		0	1e-05	0	1.54602	0	0.30917
16.2138	0		0	0	0	11.8482	0	0.31701
16.2305	0		6e-06	0	0	13.8704	3.29636	0
16.2472	7e-06		0	5.82842	0	4.65421	10.1653	6.82806
16.2638	7e-06		1.4e-05	5.97628	0	1.2588	28.906	7.00129
16.2805	0		4e-05	0	0	0	22.5108	1.63736
16.2972	0		1.7e-05	0	0	0	0.15194	1.67917
16.3138	0		0	0	0	0	7.55944	0.13566
16.3305	0		3.3e-05	0.000149	0	0	9.08626	0
16.3472	0		4.7e-05	0.000153	0	0	24.1683	0
16.3638	1.6e-05		1e-06	0	0	0	34.3194	0
16.3805	0		1.2e-05	0	0	0	11.3972	0
16.3972	1e-05		4.7e-05	4e-05	0	0	0.000131	0
16.4139	2e-06		0	1.3e-05	0	0	0	0
16.4305	5e-06		0	5.2e-05	0	0	0	0
16.4472	0		0	3.9e-05	0	0	0	0
16.4639	4.4e-05		8e-06	0	0.81666	0	0	0.20954
16.4806	4.7e-05		8e-06	0	0.83738	0	0	0.21485
16.4972	5.7e-05		7.4e-05	0	0	27.0889	2.3377	0
16.5139	7.2e-05		9.6e-05	0	0	27.7761	2.3971	0
16.5306	0		6.8e-05	3.8e-05	0	0	7.7e-05	0
16.5472	0		0.000103	0	0	0	0	0
16.5639	0		2.79114	2.2e-05	0	0	0	0
16.5806	1.3e-05		2.86195	2.8e-05	0	0	0	0
16.5973	2.9e-05		6.8e-05	7.9e-05	0	0	0	0
16.6139	1.7e-05		1.1e-05	0.000122	0	0	0	0
16.6306	5.2e-05		5.5e-05	2.7e-05	0	0	0	0
16.6473	6e-05		1.4e-05	0	0	0	0	0
16.6639	6e-06		1.5e-05	0	0	0	0.000156	0
16.6806	3e-06		0	7e-06	0	0	0.000196	0
16.6973	3e-05		6e-06	0	0	0	0.000201	0
16.714	2.3e-05		3.5e-05	0	0	0	0	0
16.7306	0		46.8166	0	0	0	0	1.13987
16.7473	0		63	9.5e-05	0	0	0	1.16879
16.764	6e-06		15.4344	0	0	0	0	0
16.7807	0		0	1e-06	0	0	0	0
16.7973	0		0	8.1e-05	0.000108	0	0	0
16.814	0		0	6e-06	0.00011	0	0	0
16.8307	1.1e-05		7e-05	7e-06	0	1.12047	2.21733	0
16.8473	0		0	9e-06	0	5.07683	2.27358	0
16.864	0		0	1.5e-05	0	4.02786	0	0
16.8807	0		3.2e-05	5.1e-05	0	0.000291	0	0
16.8974	0		2.2e-05	6.6e-05	0	0	14.8914	0
16.914	0		1.7e-05	0	0	0	29.4353	0
16.9307	0		0.44436	0	0	0	17.0061	0
16.9474	0		0.45564	0	0	0	2.61065	0
16.9641	8e-06		0	0	0	0	0	0
16.9807	8e-06		0	0	1.39362	0	0	0
16.9974	0		0.000183	6e-06	1.42897	0	0.000132	0
17.0141	0		4.1e-05	6e-06	0	0	0.000135	0
17.0307	0		0	0	0	0	0	0
17.0474	5e-06		0	0	0	0	0	0
17.0641	1.8e-05		0	0.00013	0	0	0	0
17.0807	0		0	0	0	0	0	0
17.0974	0		0	0	0	0	0.000221	0
17.1141	0		0	2.2e-05	0	0	0.000226	0
17.1308	4.1e-05		6e-06	0	0	0	0	0
17.1474	0		6.5e-05	0	0	0	0	0
17.1641	0		9.1e-05	0	0	8.38826	0	0
17.1808	5e-06		1e-05	1.3e-05	0	14.693	3.72483	0
17.1975	5e-06		3.5e-05	0	0	6.24644	29.1222	0
17.2141	0		3.1e-05	0	0	0	27.4818	0
17.2308	0		5e-06	0	0	0	3.68612	0
17.2475	0		8e-06	0	0	0	6.25907	0
17.2642	0		1.2e-05	4.2e-05	0	0.86479	4.19934	0
17.2808	0		5.1e-05	4.7e-05	0	0.88673	0	0
17.2975	0		3.2e-05	1.6e-05	0	0	9.60415	0
17.3142	0		5.2e-05	4.1e-05	0	0.85038	9.85461	0
17.3308	0		6.5e-05	0	0.00045	28.7441	0	0.23082
17.3475	0		0	0	0.000462	28.5792	0	0.23668
17.3642	1e-05		0	0	0	0	44.7193	0
17.3808	1e-05		0	1.4e-05	0	7.37479	51.1462	0
17.3975	0		0	1.4e-05	0	7.56221	14.2151	0
17.4142	0		6.8e-05	0	0	0	9.18775	0
17.4309	0		8.34499	0	0	0	0.12451	0
17.4475	0.000122		8.55669	0	0	0	0	0
17.4642	6.5e-05		0	0	4.07298	0.64728	0	0
17.4809	0		5e-06	0	4.17631	0.6637	0	0
17.4976	0		0	2.16875	0	0	0	0
17.5142	0		0	2.2238	6.49865	0	0	0
17.5309	0		0	0	6.66351	0	0	0
17.5476	0		1.3e-05	3.8e-05	0	0	0	0
17.5642	0		0	7.1e-05	0	0	0	0
17.5809	9e-06		1.15234	0	0	0	0	0
17.5976	9e-06		1.18157	1.3e-05	0	0	7.3e-05	0
17.6143	0		0	7.8e-05	0	0	7.5e-05	0
17.6309	0		0	4e-06	0	0	0	0
17.6476	4e-06		1.2e-05	1.1e-05	0	0	0	14.8938
17.6643	8e-06		2.3e-05	1.5e-05	0	0	0	20.1264
17.6809	3e-06		1.5e-05	2.1e-05	0	0	0	4.97797
17.6976	1.4e-05		1.1e-05	8.6e-05	0	0	0	0
17.7143	2.6e-05		1.6e-05	5.6e-05	0	0	0.000119	0
17.731	0		1.6e-05	0	0	0	0.00026	0
17.7476	0		7e-06	0	0	0	0.000314	0
17.7643	0		0	7.8e-05	0	0	0.000171	0
17.781	0		2e-05	9.7e-05	0	0	0	0
17.7977	0		0	4e-06	0	0	0	0
17.8143	0		0	1e-06	0	0	2.21776	0
17.831	0		0	5e-06	0	0	2.27402	0
17.8477	1.6e-05		4.3e-05	9.3e-05	0	0	0	0
17.8643	1.7e-05		0	0.000109	0.000147	0	0	0
17.881	0		1e-06	0	0.00015	0	6.20981	0
17.8977	0		5e-06	0	0	2.87786	6.36734	0
17.9144	0		0	1.1e-05	0	2.95087	4.78717	0
17.931	0		9e-06	0	0	0	4.90862	0
17.9477	0		1.2e-05	0	0	0.04235	0	0
17.9644	0		0	1.2e-05	0	0.04342	0	0
17.981	0		2.7e-05	1.2e-05	0	0	0	0
17.9977	0.000124		3.5e-05	0	0	0	0	0
18.0144	0.000359		0	0	0	0	0	0
18.0316	0		0	0	0	0	0	0
18.0482	0		0.00011	0.000159	0	0	19.4677	0
18.0649	1.5e-05		0.000105	0.000208	0	0	19.9615	7.57002
18.0816	0		0	0	0	0	0.0001	7.76206
18.0983	0		0	0	5.49481	5.18438	0.000103	3.48052
18.1149	0		2.6e-05	0	5.6342	5.3159	0	3.56881
18.1316	0		3e-05	1.2e-05	0	0	0	1.12663
18.1483	0		0	1.2e-05	0	0	0	4.63997
18.1649	0		2.5e-05	1.2e-05	0	0	0	3.57323
18.1816	0		4.6e-05	0	0	2.37676	0	0
18.1983	3.5e-05		0	0	0	2.43706	8.51187	0
18.215	7e-06		0	0	0	0	8.72795	0
18.2316	0		0	2.6e-05	0	0	0.000147	0
18.2483	0		0	0	0	0	43.5635	0
18.265	0		0	0	0	0	45.4106	8.37286
18.2816	5e-06		4.9e-05	0.000148	0	0	0.76074	8.58527
18.2983	5e-06		3.4e-05	0.000321	0	0	0	0
18.315	0		1.7e-05	0	0	0	1.12385	1.25741
18.3317	0		1.8e-05	0.000128	0	0	5.27875	1.2893
18.3483	0		0	0	0	0	4.23108	0
18.365	0		0.000213	0	0	0	10.4581	0
18.3817	0		5.7e-05	0	0	0.000169	14.4874	0
18.3984	0		5e-06	0	0	0.000173	3.88175	0
18.415	0		0	0	0	0	7.6e-05	0
18.4317	0		5e-05	7e-06	0	0	7.1e-05	0
18.4484	6e-06		0.000258	5.4e-05	0	0	0.000129	0
18.465	0		0.000193	5.1e-05	0	0	0	0
18.4817	0		0	1.4e-05	0	0	40.3829	0
18.4984	0		4e-05	5.9e-05	2.72307	0	42.4631	0
18.5151	0		8e-06	0	2.79215	0.58416	1.0825	0
18.5317	0		0	1.1e-05	0	9.09494	8.8e-05	0
18.5484	1.3e-05		1.4e-05	1.1e-05	0	8.7115	9e-05	0
18.5651	1.3e-05		3e-06	0	0	11.7827	0	0
18.5817	0		1e-05	1.4e-05	0	13.8704	0	0
18.5984	1.7e-05		2.7e-05	1.9e-05	0	8.3086	0.000124	0
18.6151	0		3e-05	3.5e-05	2.32546	6.63862	0.000258	0
18.6318	7e-06		0	1e-06	2.38445	0	0.000243	0
18.6484	1.7e-05		2.1e-05	3.6e-05	0	0	0.000109	0
18.6651	0		2.2e-05	0.000176	0	0	0.00016	0
18.6818	0		0	0.15554	0	2.91376	0.000195	0
18.6985	1.1e-05		0	0.18266	0	2.98768	0	0
18.7151	0		0	0	0	0	0	0
18.7318	0		2.89287	0	0.000344	0	0.000155	0
18.7485	0		2.96626	0	0.000353	0	0.000159	0
18.7651	0		0	0.000129	0	0	0.000218	0
18.7818	0		1.36364	0.000144	0	0	9.7835	0
18.7985	0		1.39825	0	0	0	10.0314	0
18.8152	4e-06		8e-06	4.99143	0	0	0	0
18.8318	1.3e-05		0	5.11808	0	0	0	0
18.8485	8e-06		0	3.5e-05	0.00011	0	0	0
18.8652	4e-06		0	7e-05	7.53171	0	0	0
18.8819	0		0	0	7.72267	0.000147	0	0
18.8985	0		0	9e-06	7.0264	0.000151	0	0
18.9152	0		0	7.5e-05	7.20465	0	0	0
18.9319	0		4e-06	1.4e-05	0	0	0	0
18.9485	0		4e-06	2.1e-05	0	0	0	0
18.9652	0		0	1.1e-05	0	0	0	0
18.9819	1.9e-05		1.3e-05	6.8e-05	0	0	3.66663	0
18.9986	2e-05		8.1e-05	9.6e-05	0	0	3.75965	0
19.0152	0		6.2e-05	4.9e-05	0	0	0	0
19.0319	0		0	5.1e-05	0	0	0.7027	0
19.0486	0		5.4e-05	1.2e-05	0	0	0.72053	0
19.0652	0		7.7e-05	7e-06	0	0	8.16588	0
19.0819	2.3e-05		1.3e-05	2.2e-05	0	0	8.37304	0
19.0986	6.2e-05		2.8e-05	0	0	0	8.7e-05	0
19.1153	8.4e-05		1.6e-05	0	0	0	7e-05	0
19.1319	0		1.4e-05	0	0	0	0	0
19.1486	0		1.7e-05	4e-06	0	2.16166	0.00016	0
19.1653	9e-06		0	9e-06	0	9.22472	0.000554	0
19.182	0		0	3e-06	0	7.18601	0.000373	0
19.1986	6e-06		0	0	0	0	0	0
19.2153	0		3.9e-05	0	4.36857	0	0	0
19.232	5e-06		0	0	6.37696	0.22149	0.000103	0
19.2486	1.6e-05		0	0	1.94571	0.22711	0.000106	0
19.2653	1.3e-05		0	0.000189	0	0	0	0.60042
19.282	5e-06		8e-06	0	0	0	0	0.61566
19.2986	0		8e-06	0	0	0	0	0
19.3153	0		0	2.4e-05	1.7e-05	0	0	0
19.332	0		2.4e-05	7e-06	1.8e-05	0	0	0
19.3487	0		2.9e-05	0	0	0	0	0
19.3653	3e-06		4.2e-05	0	0	0	0	0
19.382	3e-06		8.2e-05	0	0	0	0	0
19.3987	0		7.1e-05	0	0	0	0	0
19.4154	0		6e-05	2.7e-05	0	3.73436	0.000119	0
19.432	1.2e-05		1.7e-05	0	0	3.8291	0.000122	0
19.4487	1.2e-05		2e-06	1.8e-05	0.000204	0	0.000176	0
19.4654	0		4.2e-05	1.4e-05	0.000209	0	0.000213	0
19.482	0		3.43486	4e-06	0	0	0	0
19.4987	0		3.52195	0	0	0.00025	0	0
19.5154	0		3.3e-05	3.81516	0	0.000256	0	0
19.5321	0		2.8e-05	3.91195	0	0	0	0
19.5487	2.4e-05		1.2e-05	0	0	0	0	0
19.5654	0		1.1e-05	0	0	0	0	0
19.5821	0		0	0	0	0	0	0
19.5987	0		0	0	0	0	0	0
19.6154	0		0	6e-06	0	0	0	0
19.6321	0		0	0	0	0.00014	0	0
19.6488	0		4.1e-05	0	0	0.000143	8.3e-05	0
19.6654	5e-06		9e-06	0	0	0	8.5e-05	0
19.6821	5e-06		0	0	0	0	0	0
19.6988	0		0	0	0	0	0	0
19.7155	0		1.6e-05	0	0	0	0	0
19.7321	0		2.1e-05	0	0	0	0	0
19.7488	0		4e-06	0	0	0	0	0
19.7655	0		0	4.4e-05	0	0	4.36816	0
19.7821	0		2e-06	7.8e-05	0	0.54394	4.47897	0
19.7988	0		4e-06	7.9e-05	0	0.55774	0	0
19.8155	0		0	0.000192	0	0	0	0
19.8322	0		0	0	0	0	1.99237	0
19.8488	6e-06		0	7.6e-05	0	0	2.04291	1.32019
19.8655	6e-06		0	5.8e-05	0	0	0	1.35368
19.8822	0		0.26008	5.1e-05	0	0.000287	9.1e-05	0
19.8988	2e-06		0.26671	0	0	0.000294	9.3e-05	0
19.9155	4.9e-05		1.9e-05	0	0	0	0	0
19.9322	4.2e-05		2e-06	0	0	6.1e-05	0	0
19.9489	6.5e-05		0	0	0	0.000224	0	0
19.9655	6.7e-05		4e-06	4e-06	0	0	0.000187	0
19.9822	0		0	2.3e-05	0	0	7e-05	0
19.9989	0		1.072	1.8e-05	0	0	7.2e-05	0
20.0156	0		1.09921	0	0	3.56093	0	0
20.0322	0		2.1e-05	0	0	3.65127	0	0
20.0489	0		0	0	0	0	0	0.32862
20.0656	0		0	0	0	0	0	0.33696
20.0822	0		0	2.3e-05	0	0	0.000191	0
20.0989	0		5.6e-05	0	0	0	0.000196	0
20.1156	0		3.6e-05	0	0	0	0	0
20.1323	0		0	0	0	0	0	0
20.1489	0.000148		1e-06	0.11605	0	0	0	0
20.1656	0.000151		0.000102	1.24866	0	0	0	0
20.1823	0		9e-05	1.15815	0	0	0	0
20.1989	0		1e-06	1.8e-05	0	0	0	0
20.2156	5.4e-05		4.7e-05	2.1e-05	0	0	0	0
20.2323	0.000128		2.9e-05	0	1.78065	0	0	0
20.249	6e-05		0	0	3.4189	0	0	0
20.2656	0		0	0	1.63349	0	0	0
20.2823	0		0	4.3e-05	0	0.90189	0	0
20.299	0		1.9e-05	1.2e-05	0	5.47829	10.9298	1.57404
20.3157	0		0	1.3e-05	0	14.5056	11.2071	13.2861
20.3323	0		4.83167	0	0	10.0861	0	11.9683
20.349	0		4.95425	0	0	0	0	0
20.3657	0		0	0	0	0	10.0886	0
20.3823	0		0	0	0	0	10.3446	0
20.399	0		2.4e-05	0	0	0	0.000174	0
20.4157	0		3e-05	0	0	0	0.000179	0.7109
20.4323	0		3.5e-05	1.1e-05	0	0	0	0.72894
20.449	0		3.5e-05	1.3e-05	0	0	0	0
20.4657	0		1.6e-05	0	0	0	0	0
20.4824	2.1e-05		0	0	0	0	0	0
20.499	2.2e-05		0	0	0	0	6.3157	0
20.5157	0		0	0	0	0	6.47592	0
20.5324	0		6.2e-05	0	0.000258	0	1.23903	0
20.5491	0		1.8e-05	0	0.000264	0	1.27046	0
20.5657	0		6.9e-05	0	0	0.000213	0	0
20.5824	0		4.1e-05	0	0	0.000218	0	0
20.5991	1e-05		8e-05	0.000187	0	0	33.1241	0
20.6157	2.5e-05		5e-06	0.000378	0	0	33.9644	0
20.6324	1.2e-05		0	0.000164	0	0	0.000123	0
20.6491	0		4.3e-05	0	0	0	0.000126	0
20.6658	0		4.7e-05	0	0	0	8.5e-05	0
20.6824	0		0	1.45275	0	0	0.000121	0
20.6991	0		2.4e-05	1.48961	0	0	0	0
20.7158	3e-05		3.3e-05	3.2e-05	0	0.000174	0	0
20.7325	3.7e-05		0	2.7e-05	0	0.000179	0	0
20.7491	0		0.87058	4.5e-05	0.000138	0	0	0
20.7658	0		0.89266	3.6e-05	0.000142	0	0	0
20.7825	0		0	0	0	0	0	0
20.7991	0		11.7065	0	0	0	0	0
20.8158	0		12.0036	1.7e-05	0	0	0	0
20.8325	9e-06		0.000141	1.8e-05	0	1.26386	0	0
20.8492	6e-06		2.9e-05	0	0	1.29592	0	0
20.8658	6e-06		0	0	0	0	0.25187	0
20.8825	5.9e-05		0	0	0	7.26204	0.25826	0.7009
20.8992	7e-05		0	0	0	7.44627	0	0.71869
20.9158	0		0	0	0	0	0	5e-06
20.9325	0		0	0	0	12.1372	0	9.48757
20.9492	1.3e-05		0	6.2e-05	0.000189	17.564	0	9.72826
20.9659	0		9e-06	0	0.000193	5.2487	0	0
20.9825	0		1e-05	4.2e-05	0	0	0	0
20.9992	0		8e-06	4.1e-05	0	0.000212	0	0
21.0159	0.000145		3e-05	0	0	0.000218	4.73937	0
21.0326	0		4.1e-05	0	0	2.86775	8.57629	0
21.0492	0		2.4e-05	1.81535	0	2.94056	3.81097	0
21.0659	0		9e-06	1.86139	0	0	2.59171	0
21.0826	0		0	1e-06	0	0	7.89011	0
21.0992	0		0	2.2e-05	0	0	13.0336	0
21.1159	4e-06		0	1.9e-05	0	0.000242	7.86278	0
21.1326	4e-06		8e-06	1.4e-05	0	0.000248	0	0
21.1492	0		1.3e-05	1.7e-05	0	0	0.62472	0
21.1659	0		2.6e-05	0	0	0	0.64057	0
21.1826	0		3e-06	0	0	0	0	0
21.1993	2.2e-05		2.6e-05	1.16681	0	0	7.6e-05	0
21.2159	0.000178		3.7e-05	1.19641	0	0.83612	7.7e-05	0
21.2326	0.000157		3e-06	3.6e-05	0	0.85733	5.5701	0
21.2493	0		3.3e-05	6.3e-05	0	1.1307	5.7114	0
21.266	0		6.3e-05	3.9e-05	0	2.75343	0	0
21.2826	2.9e-05		0	0	0	1.31798	0	0
21.2993	0		0.42917	1.8e-05	0	0	0	0
21.316	0		0.44014	4e-05	0	0	0	0
21.3327	0		0	0	0	0	0	0
21.3493	0		5.3e-05	3.4e-05	0	0	0	0
21.366	7e-06		6.69628	0.000108	0	0	0.000114	0
21.3827	8e-06		6.86611	6e-06	0	0	0.000159	0
21.3993	0		0	3.62705	0	12.6867	1.1e-05	0
21.416	0		2.8e-05	3.71907	0	13.0085	0	0
21.4327	0		0	0	0	0	0	0
21.4493	0		3e-06	0	0.000163	0.65104	0	0
21.466	3e-06		1.1e-05	2.3e-05	0.000167	0.66756	0	0
21.4827	3e-06		1.5e-05	4.6e-05	0	1.26817	0	0
21.4994	0		1e-05	0.000232	1.67951	1.30034	0.000149	0
21.516	0		0	0.000161	3.15849	0	0.000153	0
21.5327	5e-06		5.1e-05	0	12.6374	0	0	0
21.5494	5e-06		0.00012	0	18.5452	0	0	0
21.5661	0		0.000116	2.7e-05	11.0214	0	0.000123	0
21.5827	0		6e-05	2e-06	3.61511	0	0.000126	0
21.5994	0		3.1e-05	2.6e-05	5.8e-05	0	0	0
21.6161	0		0.56003	2.3e-05	0	0	0	0
21.6327	0		0.57419	6.7e-05	0	0	0	0
21.6494	0		5e-06	4.3e-05	2.26831	0	0	0
21.6661	0		1.1e-05	0	2.32586	0	0	0
21.6828	0		0	2e-06	0	0	0	0
21.6994	1.2e-05		2.4e-05	8.8e-05	0	0	0	0
21.7161	1.2e-05		4.1e-05	0.000117	0	0	0	0
21.7328	0		3.5e-05	0.00012	0	0	0	0
21.7494	0		4.9e-05	0	0	0	0	0
21.7661	0		4.5e-05	0	0	0	6.8489	0
21.7828	0		0	5e-06	0	0	7.02265	0
21.7995	4e-06		0	5e-06	0.00024	0	0	0
21.8161	0		0	0	0.000246	0	0	0
21.8328	0		3.6e-05	0	0	0	0	0
21.8495	0		0	7e-06	0	4.05987	0	0
21.8662	4e-06		0	2.5e-05	0	4.16286	4.29337	0
21.8828	4e-06		0	3.1e-05	0	0	8.62724	0
21.8995	0		0.000122	0	0	0	4.33213	0
21.9162	0		0.000125	0	0	0	0	0
21.9328	0		7.9e-05	3e-06	0	0	0	0
21.9495	0		14.4871	0.000118	0	0	0	0
21.9662	0		14.8545	6e-06	0	0	0	0
21.9828	0		2.11822	0.000101	0	0	8e-05	0
21.9995	0		2.17195	1e-05	0	20.6284	8.2e-05	0
22.0162	0		4.8e-05	1.1e-05	0	21.1517	0.000107	0
22.0329	0		0.000104	8e-06	0	0	0.000132	0
22.0495	5e-06		0	0	0	0	0	0
22.0662	5e-06		0	1.7e-05	0	0	11.2767	0
22.0829	0		0	6e-06	0	0	11.5628	0
22.0996	0		1e-05	7e-06	0	0	0	0
22.1162	0		0.000131	0	0	0	0	0
22.1329	0		0.000167	0	0	2.53718	0	0
22.1496	0		2.40118	3.78424	0	2.60155	0	0
22.1663	0		19.014	3.8804	0	4.85304	0.000163	0
22.1829	0		16.9718	0	0	14.5131	0.000167	0
22.1996	0		0.91494	0	0	9.7842	0	0
22.2163	0		0.93815	4.8e-05	0.000206	5.72462	0	0
22.2329	0		0	0	0.000211	5.86985	0	0
22.2496	0		5.3e-05	1.8e-05	0.000115	0	0	0
22.2663	0		0	0	0.000175	0	0	0
22.2829	0		1.8e-05	7.25503	0	0	0	0
22.2996	0		0	9.33557	0	6.02496	1.71948	0
22.3163	0		7e-06	1.9446	0	6.17781	1.7631	0
22.333	0		0	1.6e-05	0	0	0	0
22.3496	0		0	0	0	0	0	0
22.3663	6e-06		0	1e-05	0	0	0.000119	0
22.383	1.6e-05		0	7.7e-05	0	0	0	0
22.3997	2.7e-05		0	6.8e-05	0	0	0.000253	0
22.4163	0		0.00011	0	0	0	18.7427	0
22.433	0		0	5e-06	0	2.19652	19.2178	0
22.4497	0		0	0	0	10.064	0	0
22.4663	0		4.1e-05	5.5e-05	0	11.9624	0	0
22.483	0		1.3e-05	5.9e-05	0	4.05278	0.75997	0
22.4997	0		8e-05	0	0	13.2048	0.77925	0
22.5164	0.000102		8.1e-05	1.9e-05	0	21.7464	0	0
22.533	0.000105		0	4.5e-05	0	8.41482	0	0
22.5497	0		0	1.7e-05	0	0	0	0
22.5664	0		0	2e-06	5.1e-05	0	0	0
22.5831	0		6e-06	0	5.2e-05	0	0	0
22.5997	5e-06		0	2.3e-05	0	8.66281	0	0
22.6164	0		0	2.4e-05	0	21.9534	0	0
22.6331	0		0	4.5e-05	0	13.4024	0	0
22.6497	0		0	0	0	1.98006	0	0
22.6664	0		4.2e-05	0	0	2.89951	0	0
22.6831	2.2e-05		1.8e-05	0.97896	0.00717	0.85478	0	0
22.6998	2.2e-05		9e-06	1.00378	0.00736	0	0.69534	0
22.7164	0		0	1.95585	0	0	4.90788	0
22.7331	0		0.000251	9.21966	0	0.000207	4.30131	0
22.7498	4e-06		0.000257	7.39728	0.04247	0.000212	0	0
22.7664	0		0	0	0.04354	0	0	3.89432
22.7831	0		4e-06	0	0	0	0	3.99312
22.7998	0		0	0	0	0	0	0
22.8164	1.3e-05		0	2.2e-05	0	0	0	0
22.8331	1.3e-05		0.000122	0	0	0	0	0
22.8498	1.1e-05		0	1.6e-05	0	0	0	2.64037
22.8665	1.9e-05		0	2.1e-05	0	0	0	3.79775
22.8831	1.9e-05		0	9e-06	0	0	0	1.11805
22.8998	0		0	1.6e-05	0	0	0	0
22.9165	0		0	1e-06	0	0	0	0
22.9332	5e-06		0	3e-06	0	0	0	0
22.9498	2.2e-05		8.39455	3.4e-05	0	0.00018	0	0
22.9665	1.7e-05		8.60751	9.2e-05	0	0.000185	0	0
22.9832	0		2.2e-05	0	0	0	0	0
22.9998	0		0	0	0	0	0	0
23.0165	0		2.7e-05	0	0	0	0	0
23.0332	0		0	0	0	0	0	0
23.0499	0		6e-06	0	0	0	0	0
23.0665	0		0.000238	1.4e-05	0	0	0	0
23.0832	3.8e-05		0.000244	5.6e-05	0	0	0	0
23.0999	0		0.000937	0	0	0	0	0
23.1166	3e-05		0.00096	0	0	0	0	0
23.1332	6e-05		0	0	0	0	0	0
23.1499	0		1.64759	0	0	0	0	5e-06
23.1666	0		4.93514	0	0	0	0	5e-06
23.1832	3.1e-05		9.47546	0	0	0	0	0
23.1999	3.2e-05		6.30329	4.92339	0	0	0	0
23.2166	0		5e-05	5.04835	0	0	0	0
23.2333	1.4e-05		3.5e-05	1.6e-05	0	0	0	0
23.2499	3.2e-05		6e-06	0	0	0	0	0
23.2666	0		3.6e-05	1.6e-05	0	0	7.8e-05	0
23.2833	0		0.000133	0	0	0	8e-05	0
23.2999	0		0.0001	5e-06	0	0	0	0
23.3166	6e-06		0	1.4e-05	0	0	0	0
23.3333	1.9e-05		0	0	2.85352	0	0	0
23.35	4.5e-05		1.3e-05	0	2.92591	0	0	0
23.3666	3.1e-05		0	0	0	0	0	0
23.3833	0		0	0	0.64268	0	0	0
23.4	0		0	0	0.65899	0	1.05159	0
23.4167	9e-06		1.7e-05	0	0	0	12.4206	0
23.4333	1e-05		0	1.2e-05	0	0	11.6301	0
23.45	0		0	8.2e-05	0.000338	0	0	0
23.4667	0		0	4.96444	0.75753	0	0	0
23.4833	1e-05		5.5e-05	5.09034	0.77675	0	0.000123	0
23.5	0		0	0	0	0	0.000126	0
23.5167	0		0	0	0	0	0	0
23.5333	1.2e-05		6e-06	7.1e-05	0	0	0	1.90948
23.55	0		0	0.000172	0	0	0	1.95792
23.5667	0		0	0	0	0	0	0
23.5834	0		0	7.6e-05	0	0	0	0
23.6	0		0	0	0	0.000195	0	0
23.6167	0		0	3.1e-05	0	0.000199	0	0
23.6334	0		0	1.1e-05	0	0	0	0
23.6501	0		3.8073	1.4e-05	0.000178	0	0	0
23.6667	0		3.90388	4.2e-05	0.000183	0	0	0
23.6834	0		0	8e-06	0	0	0	0
23.7001	0		0	0.000122	0	0	0	0
23.7167	0		0	0.000116	0	0	0	0
23.7334	2.2e-05		4.3e-05	0	0	0	0.000228	0
23.7501	0		0	8.6e-05	1.6e-05	1.59626	0.000234	0
23.7668	3e-06		1.2e-05	0	1.7e-05	1.63675	0	0
23.7834	0		0	0	0	2.81388	0	0
23.8001	0		0	0	4.77206	8.00889	0	0
23.8168	0		0	0	4.89312	5.30913	0	0
23.8334	0		0	1.4e-05	0	0.05693	0	0
23.8501	1e-05		0	0	0	28.5669	0.000274	0
23.8668	4.3e-05		2.1e-05	0	0	29.2917	0.000281	0
23.8835	4.1e-05		0	0	0	0	0	0
23.9001	0		0	5.2e-05	0	0	0.000102	0
23.9168	0		1.3e-05	6.41105	0	0	0.000262	0
23.9335	0		0	6.57369	0	0	5e-06	0
23.9502	2.1e-05		0	0	0	0	0.000138	0
23.9668	2.1e-05		0	0	0	0	0	0
23.9835	0		4.5e-05	3.7e-05	0	0	0	0
24.0002	0		6.1e-05	3.8e-05	0	0	0	0
24.0168	3e-06		1.3e-05	0	0	0	0	0
24.0335	3e-06		3.4e-05	0	0	0	0	0
24.0502	2.3e-05		0	0	0	0.73696	0	0
24.0669	2.5e-05		0	4e-05	0	0.75566	0	0
24.0835	0		8e-06	6e-06	0	9.17175	0	0
24.1002	0		0.000155	0	0	26.7053	5.2e-05	0
24.1169	0		0	6.3e-05	0	23.9961	5.3e-05	0.06049
24.1335	0		0	6.8e-05	0.000243	2.30509	0.30037	0.06203
24.1502	0		6e-06	0	0.000249	0	0.30799	0
24.1669	0		0	0	0	0	0	0
24.1836	4e-06		2e-06	0	5.8e-05	0	0	0
24.2002	4e-06		2.1e-05	0	6e-05	0.000196	0	0
24.2169	0		0	0	0	0.000336	0	0
24.2336	0		0	0	0	8.3e-05	0	0
24.2503	0		0	7e-05	0	0	0	0
24.2669	0		5.3e-05	7.5e-05	0	0	0	0
24.2836	0		0	0	0	0	0	0
24.3003	0		2.9e-05	0	0.60142	0	0	0
24.3169	6.6e-05		6e-05	7e-05	0.61668	7.7136	0	5.01071
24.3336	0		0	2e-05	0	13.8928	0.000157	7.79109
24.3503	0		5.6e-05	0	2.09881	6.13534	6.38099	7.19165
24.367	0		5.5e-05	5.1e-05	2.15205	0.28132	6.54266	4.5845
24.3836	5.2e-05		6.17251	4.5e-05	0	0.28845	0	0
24.4003	0		13.9161	0	0	1e-05	0	0
24.417	0		7.77947	0	0	0	0	0
24.4337	0		0	0	0	0	0	0
24.4503	0		6e-06	0	0	0	1.52333	0
24.467	0		3.1e-05	0	0	0	1.56198	0
24.4837	0		0	0	0	0	0	0
24.5003	0		0	0	0	0	0	0
24.517	2.8e-05		0	0	0	0	0	0
24.5337	2.8e-05		8e-06	0	0	0	0.00011	0
24.5504	0		0	3.4e-05	0	2.53573	0.000113	0
24.567	2.3e-05		0	3.5e-05	0	2.60006	0	0
24.5837	4e-05		0.000122	3e-06	0	0	0	0
24.6004	0		0.000125	1.2e-05	0.64858	0	0	0
24.617	0		0	1.6e-05	3.15422	0	0.00012	0
24.6337	0		0	4.6e-05	13.5497	0	0.000123	0
24.6504	1e-05		0	3.2e-05	11.2763	0	0	0
24.667	1e-05		6e-06	0	4.48568	0	0	0
24.6837	0		6e-06	0	4.59948	0	0	0
24.7004	4.3e-05		0	1.2e-05	0	0	0	0
24.7171	4.4e-05		0	0	0	0	3.56173	0
24.7337	0		0	0	0	0	3.65209	0
24.7504	4.2e-05		0	0	0	0	0	0
24.7671	0		7e-06	0	3.99708	0	0	0
24.7838	0		1.4e-05	0	4.09848	0.3459	0	0
24.8004	0		5e-06	8e-06	0	4.48751	0	0
24.8171	1.1e-05		51.1984	7.22163	0	4.23767	0	0
24.8343	1.1e-05		60.4476	15.0493	0	0	0	0
24.8509	0		8.15231	7.76277	0	0	0	0
24.8676	0		0	0.000131	0	0	0	0
24.8843	2e-06		10.1179	10.3175	0.000168	0	0	0
24.901	0		10.3748	27.7451	8.62226	4.77485	0	0
24.9176	0		1.36887	26.4004	8.84097	44.4109	0	0
24.9343	0		7.03219	12.5066	0.000199	48.547	0	0
24.951	0		10.3173	5.22128	5.93517	33.9916	0	0
24.9676	0		15.27	1.74108	9.58289	29.5237	0	0
24.9843	0		44.3619	0	3.58587	3.20365	0	0
25.001	1.43014		54.9678	0	0	0	9e-05	0
25.0177	6.92064		28.8085	0	0	5.87165	17.8245	0
25.0343	5.59259		28.4834	0	0	38.1249	18.2766	0
25.051	0		25.2804	1.3e-05	0	44.128	0	0
25.0677	0		19.0717	2.1e-05	0	11.4902	0	0
25.0844	0		33.0647	1e-05	0	0	0	0
25.101	1.8e-05		26.1152	1e-06	0	0	0	0
25.1177	0		33.6983	4.3e-05	0	6.23534	0	0
25.1344	2.9e-05		67.4198	4.7e-05	0	6.39353	0	0
25.151	0		54.8479	0	1.48593	1.63326	0	0
25.1677	0		8.88637	2e-05	15.7575	14.7533	0	0
25.1844	0		30.2549	1.5e-05	14.5949	21.4127	0	0
25.2011	0		64.5168	4e-06	0	15.6464	9.3e-05	0
25.2177	0		39.949	6e-05	0	7.61999	9.6e-05	0
25.2344	1.6e-05		11.3896	4e-05	0	10.6306	0	0
25.2511	2.1e-05		17.9318	0	0	12.8996	0	0
25.2677	0		28.8474	0	0	31.4493	0	0
25.2844	1.22752		18.9572	0	0	34.9419	0	0
25.3011	1.25866		7.9975	4e-06	0	19.1025	0	0
25.3178	0		11.3249	4e-06	0	15.8348	13.8445	0
25.3344	0		11.3497	0	0	0.66084	14.1957	0
25.3511	3e-06		6.69815	9.9e-05	0	0	0	0
25.3678	3e-06		0	0.000104	0	0	0	0
25.3845	0		0.93796	0	0	0	0	0
25.4011	0		3.04978	0	0	0.000147	0	0
25.4178	0		3.04399	1.4e-05	0	0.00015	0	0
25.4345	2.4e-05		2.24689	0	0	0	0	0
25.4511	0		8.92296	7e-06	0	0	0	0
25.4678	0		7.76056	0	0	0	0	0
25.4845	4e-05		0	3e-06	0	0	0.000131	0
25.5012	3.2e-05		2.4e-05	0	0	0	0.000135	0
25.5178	0		0	0	0	2.7165	0	0
25.5345	0		7e-06	0	0	4.91622	0	0
25.5512	0		0.79208	0	0	2.18486	7.5e-05	0
25.5678	0		0.81216	1.8e-05	0.000191	0	7.7e-05	0
25.5845	0		0	4.3e-05	0.000196	0	0	0
25.6012	0		0	2.1e-05	0	10.8346	0	0
25.6179	1.3e-05		0	0	0	11.1095	0	0
25.6345	0		1.67872	2.8e-05	0	0	0	0
25.6512	1.4e-05		2.05466	4e-05	0	3.98354	6.0106	0
25.6679	2.2e-05		0.34181	0	0	4.30244	6.16308	0
25.6845	0		0.85994	7.14432	0	0.22337	0	0
25.7012	0		5.06211	7.32556	0	0	0	0
25.7179	0		12.0182	0	0	0	0	0
25.7346	0		7.92787	0	0	0	0	0
25.7512	0		0	0	1.68542	0.3977	0	0
25.7679	0		0	0.61671	1.72818	0.40779	0	0
25.7846	0		15.215	0.63236	0	0	0	3.8202
25.8012	0		25.777	0	0	0	0	3.91711
25.8179	0		30.3771	0	0	5.12636	0	0
25.8346	0		27.7553	0	2e-05	6.35218	0	0
25.8513	0		15.3714	0	2e-05	1.12357	0	0
25.8679	0		10.7174	0	0	0	0	0
25.8846	0		4.10042	0	0	0	0	0
25.9013	1.45793		4.37995	0	0	0	0	0
25.918	1.49492		37.4252	0	0	3.35402	0	0
25.9346	0		64.1037	0	0	3.43911	0	0
25.9513	0		30.5675	0	0	0	0	0
25.968	0		0.000107	0.03568	0	9.10148	0	0
25.9846	0		0	0.03659	0	9.33237	0	0
26.0013	1.2e-05		11.8873	0	0	0	0	0
26.018	0		38.3865	0	0	9.32121	0	0
26.0347	0		26.8623	0	0	11.669	0	0
26.0513	0		0	0	0	0	0	0
26.068	0		0	0	0	0	0	0
26.0847	0		16.4647	0	0	14.7859	0	0
26.1014	0		16.8824	0	0	36.112	6.00906	0
26.118	0		5.0645	0	0	21.4832	13.8218	0
26.1347	0		8.07149	0	0	29.5646	16.0295	0
26.1514	0		2.49767	0	0	35.623	8.38222	0
26.168	0		0	0	0	5.4456	0	0
26.1847	4e-06		0	0	0	0	0	0
26.2014	3e-05		0	1.1e-05	0	1.72181	0	0
26.2181	2.6e-05		0	1.5e-05	0	4.74358	0	0
26.2347	0		9.39329	0	0	3.05364	0	0
26.2514	0		9.63158	0	0	2.54053	0	0
26.2681	0		22.2384	0	0	26.9064	0	0
26.2847	0		22.8026	1.6e-05	0	24.9179	0	0
26.3014	0		0	1.6e-05	0	0	0	0
26.3181	0		0	0	0	0	0	0
26.3348	0		3.11057	4.11276	0	0	0	0
26.3514	0		3.18948	4.2171	0	0	0	0
26.3681	0		0.00518	1.7e-05	0	0	0	0
26.3848	0		20.7174	1.7e-05	0	10.4606	0	0
26.4015	0		32.9253	0	0	16.3508	0	0
26.4181	0		17.4952	0	1.34909	5.76746	0	0
26.4348	0		23.7096	0.000106	1.38332	0	0	0
26.4515	0		17.9978	0.000108	0	0	0	0
26.4681	0		4.34909	2e-06	0	0	0	0
26.4848	0		4.45943	3.1e-05	0	0	3.7e-05	0
26.5015	0		0	0	0	0	3.8e-05	0
26.5181	0		0	0	0	0	0	0
26.5348	0		6e-06	0	0	0	0	0
26.5515	0		0.94763	0	0	0	0	0
26.5682	0		5.22642	0	0	0	0	0
26.5848	0		4.12255	0	0	0	0	0
26.6015	0		5.89886	0	0	0	0	0
26.6182	1.10453		10.5111	0	0	0	0	0
26.6349	1.13255		11.0296	0	0	0	0	0
26.6515	0		6.61752	0	0	0	0	0
26.6682	0		0	0	0	0	0	0
26.6849	0		2.82096	0	0	0	0	0
26.7016	0		3.08386	0	0	0	0	0
26.7182	0		0	0	0	0	0	0
26.7349	0		2.6e-05	0	0	0	0	0
26.7516	0		2.7e-05	0	0	0	0	0
26.7682	0		0	0	0	0	0	0
26.7849	0		0	0	0	0	0	0
26.8016	0		0	0	0	0	0	0
26.8182	0		0	0	0.000169	0	1e-05	0
26.8349	0		0	0	0.000173	0	0.000217	0
26.8516	0		0	0	0	0	0.00021	0
26.8683	0		0	0	0	0	0	0
26.8849	0		4.8e-05	0	0	0	0.000116	0
26.9016	0		4.9e-05	0	0	0	0.000237	0
26.9183	0		6e-06	2e-05	0	0	0	0
26.935	0		1.9e-05	2e-05	0	0	0	0
26.9516	0		0	0	0	0	0	0
26.9683	0		9e-06	0	0	0	0	0
26.985	0		2.1e-05	0	0	0	0	0
27.0017	0		0	0	0	0	0	0
27.0183	0		0	0	0	0	0	0
27.035	0		0	0	0	0	0.8188	0
27.0517	0		0	0	0	0	0.83957	0
27.0683	0		0	0	0	0	0	0
27.085	0		0	0	0	0	0	0
27.1017	0		0	0	0	2.28238	0	0
27.1183	0		0	0	0	4.63765	0	0
27.135	0		0	0	0	15.0904	0	0
27.1517	0		0	0	0	13.0578	0	0
27.1684	0		0	0	0	0	0	0
27.185	0		0	0	0	0	0	0
27.2017	0		0	0	0	0	0	0
27.2184	0		0.000131	0	0	0	0	0
27.2351	0		0.000135	0	0	0	0	0
27.2517	0		0	0	0	0	0	0
27.2684	0		0	0	0	0	0	0
27.2851	0		0	0	0	0	0	0
27.3017	0		0	0	0	0	0	0
27.3184	0		0	0	0.000197	0	0	0
27.3351	0		0	0	0.000202	0	0	0
27.3518	0		0	0	0	0	0	0
27.3684	0		0	0	0	0	0	0
27.3851	0		0	0	0	0	0	0
27.4018	0		0	0	0	0	0	0
27.4184	0		0	0	0	0	0	0
27.4351	0		0	0	0	0	0	0
27.4518	0		0	0	0	0	0	0
27.4685	0		0	0	0	0	0	0
27.4851	0		0	3e-05	0	0	0	0
27.5018	0		1.4e-05	3e-05	0	0	0	0
27.5185	0		1.5e-05	0	0	0	0	0
27.5352	0		0	0	0	0	0	0
27.5518	0		0	0	0	0	0	0
27.5685	0		0	0	0	0	1.11111	0
27.5852	0		0	4e-06	0	0	1.1393	0
27.6018	0		0	4e-06	0	0	0	0
27.6185	0		0	0	0	0	0	0
27.6352	0		1.5e-05	0	0	0	0	0
27.6519	0		0	0	0	0	0	0
27.6685	0		0	0	0	0	0	0
27.6852	0		0	0	0	0	0	0
27.7019	0		0	0	0	0	0	0
27.7186	0		0	0	0	0	0	0
27.7352	0		0	0	0	0	0	0
27.7519	0		0	1.2e-05	0	0	0	0
27.7686	0		0	1.2e-05	0	0	0	0
27.7852	0		0	2.4e-05	0	0	0	0
27.8019	0		0	2.8e-05	0	0	0	0
27.8186	3e-06		0	7.5e-05	0	0	0	0
27.8353	3e-06		0	8.3e-05	0	0	0	0
27.8519	0		0	0	0	0	0	0
27.8686	0		0	0	0	0	0	0
27.8853	0		0	0	0	0	0	0
27.9019	0		0	0	0	0	0	0
27.9186	0		0	0	0	0	0	0
27.9353	0		0	0	0	0	0	0
27.952	0		0	0	0	0	0	0
27.9686	0		9e-06	0	0	0	0	0
27.9853	0		1e-05	0	0	0	0	0
28.002	0		0	0	0	0	0	0
28.0187	0		1.4e-05	0	0	0	0	0
28.0353	0		2e-05	0	0	0	0	0
28.052	0		0	0	0	0	0	0
28.0687	0		0	0	0	0	0	0
28.0853	0		0	0	0	0	0	0
28.102	0		0	0	0	0	0	0
28.1187	0		2.8e-05	0	0	0.6606	0	0
28.1354	0		2.9e-05	0	0	0.67735	0	0
28.152	0		0	0	0	0	0	0
28.1687	0		0	0	0	0	0	0
28.1854	0		1.9e-05	0	0	0	0	0
28.202	9e-06		0	0	0	0	0	0
28.2187	1e-05		0	0	0	0	0	0
28.2354	0		0	0	0	0	0	0
28.2521	0		0	0	0	0	0	0
28.2687	0		0	0	0	0	0	0
28.2854	0		0	0	0	0	0	0
28.3021	0		0	0	0	0	0	0
28.3188	0		0	0	0	0	0	0
28.3354	0		0	0	0	0	0	0
28.3521	0		0	0	0	0	0	0
28.3688	0		0	0	0	0	0	0
28.3854	0		0	5.9e-05	0	0	0	0
28.4021	0		0	6.1e-05	0	0	0	0
28.4188	0		0	0	0	0	0	0
28.4354	0		0	0	0	0	0	0
28.4521	0		0	1.2e-05	0	0	0	0
28.4688	0		1.1e-05	1.2e-05	0	0	0	0
28.4855	0		1.1e-05	0	0	0	0	0
28.5021	0		0	0	0	0	0	0
28.5188	0		0	0	0	0	0	0
28.5355	0		0	0	0	0	0	0
28.5522	0		0	0	0	0	0	0
28.5688	0		0.07432	0	0	0	0	0
28.5855	0		0.07621	0	0	0	0	0
28.6022	0		1.6e-05	0	0	0	0	0
28.6188	0		1.1e-05	0	0	0	0	0
28.6355	0		0	9e-06	0	0.000192	0	0
28.6522	0		0	1e-05	0	0.000197	0	0
28.6689	0		0	0	0	0	0	0
28.6855	0		0	0	0	0	0	0
28.7022	0		0	0	0	0	0	0
28.7189	0		0	0	0	0	0	0
28.7355	0		0	0	0	0	0	0
28.7522	0		0	0	0	0	0	0
28.7689	0		0	0	0	0	0	0
28.7856	0		0	0	0	0	0	0
28.8022	0		0	0	0	0	0	0
28.8189	0		0	0	0	0	0	0
28.8356	0		0	0	0	0	0	0
28.8523	0		0	0	0	0	0	0
28.8689	0		0	0	0	0	0	0
28.8856	0		0	0	0	0	0	0
28.9023	0		0	0	0	0	0	0
28.9189	0		0	0	0	0	0	0
28.9356	0		0	0	0	0	0	0
28.9523	0		0	0	0	0	0	0
28.969	0		0	0	0	0	0	0
28.9856	0		0	0	0	0	0	0
29.0023	0		0	0	0	0	0	0
29.019	0		0	0	0	0	0	0
29.0357	0		0	0	0	0	0	0
29.0523	0		0	0	0	0	0	0
29.069	0		0	0	0	0	0	0
29.0857	0		0	0	0	0	0	0
29.1023	0		0	0	0.66161	16.9757	4.65616	0
29.119	5.7e-05		4.73765	0	0.67839	54.9326	4.77428	0
29.1357	5.9e-05		18.3907	7.00728	4.15834	78.6092	0.11124	0
29.1523	0		16.3542	11.4526	22.1794	89.745	11.2605	0.39783
29.169	0		7.87899	6.59689	28.5866	70.4637	23.1714	16.1562
29.1857	1.6e-05		30.0061	3.88903	13.2597	92.1819	13.5379	16.1478
29.2024	0		39.9272	1.67623	2.8546	114.855	1.53908	0
29.219	0		15.1467	0	0	49.5868	1.1e-05	3e-06
29.2357	0		2.2e-05	0	0	4.97519	0	0.000353
29.2524	0		1.4e-05	3.1e-05	0	0	0.08146	0
29.2691	0		5.5e-05	9.2e-05	0	10.7087	0.08357	0
29.2857	0		0	0	0	10.9803	4.9e-05	0
29.3024	0		0	2.6e-05	0	0	0	0
29.3191	5.2e-05		0	0	0	0	0	0
29.3357	0		0	1.3e-05	0.77279	0	0	0
29.3524	0		0	0	0.7924	0	0	0
29.3691	0		2e-05	0	0	0	0	0
29.3858	1.7e-05		2.1e-05	3.44936	0	0	0	0
29.4024	0		1e-06	3.53687	0	0	0	0
29.4191	0		7e-06	0	0	0	0	0
29.4358	0		0	1.7e-05	0	0	0	0
29.4524	0		0.000132	0	0	0	0	0
29.4691	5e-05		0.000139	0	0	0	0	0
29.4858	0.000132		3.8e-05	0	0	0	0	0
29.5025	0.000135		3.9e-05	0	0	6.69815	0	0
29.5191	0		0	0	0	6.86808	0.000351	0
29.5358	1.5e-05		0	1.6e-05	0	0	0.00036	0
29.5525	0		1.3e-05	1.7e-05	0	0	0	0
29.5692	0		3.3e-05	1e-06	4.58801	0	0	0
29.5858	6e-06		5.6e-05	1.8e-05	4.70441	0	0.000119	0
29.6025	2.5e-05		0.000235	1.2e-05	0	25.3802	0.000122	0
29.6192	1.7e-05		0.000298	0	0	37.0802	0	0
29.6358	0		0	2e-06	0	14.4841	0	0
29.6525	9e-06		0	1.35574	0	8.09372	8e-05	0
29.6692	0		0	1.39015	0	5.02487	8.2e-05	0
29.6859	0		5.1e-05	0	0	0	4.75084	0
29.7025	0		0	10.3876	0	0	4.87136	0
29.7192	0.000105		0	19.1807	0	1.39154	8.6e-05	0
29.7359	4.6e-05		5.89373	8.74592	0	1.42684	8.9e-05	0
29.7525	0		10.1981	0	0	0	0	0
29.7692	0		4.26032	4.6e-05	0	0	0	0
29.7859	0		2.7e-05	9.2e-05	0	0	0	0
29.8026	0		0	0.08302	0	0	0	0
29.8192	2e-05		4.5e-05	0.08512	0	0	0	0
29.8359	0		0	0	0	0	0	0
29.8526	0		5e-06	0	0	1.08307	0	0
29.8693	0		1.8e-05	0	0	1.11054	0	0
29.8859	0		2.5e-05	0	0	0.000111	0.000295	0
29.9026	0		7e-06	0	0	0.000114	0.000303	0
29.9193	1.7e-05		0	0.00015	0	0	0	0
29.9359	0		9.3e-05	0	0	5.47472	0.000188	0
29.9526	3e-06		9.5e-05	2.3e-05	0	9.77127	0.000363	0
29.9693	6e-06		3.7e-05	4.7e-05	0	4.26313	0	0
29.9859	1.2e-05		0	0	0	0	1.80443	0
30.0026	0		1.7e-05	0	0.000174	0	1.85021	0

## Sheet: Fig 4B inset
UDP-glc concentration	Ion intensity
-7.89279	4.48528
-7.19382	5.11081
-6.49485	5.85605
-5.79588	6.58747
-5.09691	7.37086
-4.30103	8.0015

## Sheet: Fig 4D
	CMP-SA	UDP-gal	UDP-glc	UDP-xyl	UDP-glcNAc & UDP-galNAc	UDP-glcA	GDP-Man	GDP-fuc
Retention time (min)	Ion intensity
0.50756	0	0	--	0	12.4432	0	0	0
0.52521	0	0	--	0	12.4432	0	0	0
0.54285	0	0	--	0	5.4276	0	1.7e-05	0
0.56049	0	0	--	0	0	0	1.7e-05	0
0.57814	0	0	--	0	0	0	0	0
0.59576	0	0	--	0	0	0	1.7e-05	0
0.61341	0	0	--	0	0	0	2.7e-05	0
0.63105	0	0	--	0	0	0	0	0
0.64869	0	0	--	0	0	0	0	0
0.66634	0	0	--	0	0	0	0	0
0.68399	0	0	--	0	0	0	0	0
0.70164	0	0	--	0	0	0	0	0
0.71928	0	0	--	0	0	0	0	0
0.73693	0	0	--	0	0	0	0	0
0.75455	0	0	--	0	0	0	0	0
0.7722	0	0	--	0	0	0	0	0
0.78984	0	0	--	0	0	0	0	0
0.8075	0	0	--	0	0	0	0	0
0.82515	0	0	--	0	0	0	0	0
0.84277	0	0	--	0	0	0	0	0
0.86041	0	0	--	0	0	0	0	0
0.87805	0	0	--	0	0	0	0	0
0.89569	0	0	--	0	0	0	0	0
0.91333	0	0	--	0	0	0	0	0
0.93098	0	0	--	0	0	0	0	0
0.94862	0	0	--	0	0	0	0	0
0.96627	0	0	--	0	0	0	0	0
0.98391	0	0	--	0	0	0	0	0
1.00155	0	0	--	0	0	0	0	0
1.0192	0	0	--	0	0	0	0	0
1.03686	0	0	--	0	0	0	0	0
1.0545	0	0	--	0	0	8.97151	0	0
1.07213	0	0	--	0	0	9.19911	0	0
1.08977	0	0	--	0	0	0	0	0
1.10743	0	0	--	0	0	0	0	0
1.12507	0	0	--	0	0	0.98786	0	0
1.14272	0	0	--	0	0	1.01292	0	0
1.16036	0	0	--	0	0	0	0	0
1.17799	0	0	--	144.888	63.9363	0	0	10.0081
1.19563	0	0	--	445.519	323.983	0	0	10.262
1.21327	0	0	--	639.725	490.328	0	0	0
1.23091	0	0	--	656.963	272.619	0.000729	4e-06	0
1.24855	0	0	--	475.261	48.6146	0.000747	4e-06	0
1.2662	0.73061	0	--	231.515	0.000613	0	0	0
1.28383	0.74915	0	--	121.922	0.72328	0	0	0
1.30147	0	0	--	120.162	0	0.08033	0	0
1.31912	0	0	--	112.087	0	0.08237	0	0
1.33679	0	0	--	38.0587	0	0	0	0
1.35443	0	0	--	15.9527	0	0	0	0
1.37208	0	0	--	14.8161	0	0	0	0
1.38973	0	0	--	0.63846	0	0	0	0
1.40735	0	0	--	0.65465	0	0	0	0
1.425	0	0	--	0	0	0	0	0
1.44264	0	0	--	0	0	0	0	0
1.46028	0	0	--	0	0	0.75874	0	0
1.47793	0	0	--	0	0	0.77798	0	0
1.49557	0	0	--	0	0	0	0	0
1.51321	0	0	--	0	0	0	0	0
1.53086	0	0	--	0	0	0	0	0
1.5485	0	0	--	0	0	0	0	0
1.56615	0	0	--	0	0	0	0	0
1.5838	0	0	--	0	0	0	0	0
1.60144	0	0	--	0	0	0	0	0
1.61908	0	0	--	0	0	0	0	0
1.63673	0	0	--	0	0	0	0	0
1.65438	0	0	--	0	0	0	0	0
1.67203	0	0	--	0	0	0	0	0
1.68965	0	0	--	0	0	0	0	0
1.7073	0	0	--	0	0	0	0	0
1.72495	0	0	--	0	0	2.75746	0	0
1.74259	0	0	--	0	0	2.82741	0	0
1.76022	0	0	--	0	0	0	0	0
1.77786	0	0	--	0	0	0	0	0
1.79551	0	0	--	0	0	0	0.5277	0
1.81315	0	0	--	0	0	0	0.54109	0
1.83079	0	0	--	0	0	0	0	0
1.84844	0	0	--	0	0	0	0	0
1.86609	0	0	--	0	0	0	0	0
1.88373	0	0	--	0	0	0	0	0
1.90138	0	0	--	0	0	0	0	0
1.91902	0	0	--	0	0	0	0	0
1.93666	0	0	--	0	0	0	0.89826	0
1.95431	0	0	--	0	0	0	0.92105	0
1.97193	0	0	--	0	0	0	0	0
1.98958	0	0	--	0	0	0	0	0
2.00724	0	0	--	0	0	0	0	0
2.02488	0	0	--	0	0	0	0	0
2.04252	0	0	--	0	0	0	0	0
2.06017	0	0	--	0	0	0	0	0
2.07781	0	0	--	0	0	0	0	0
2.09545	0	0	--	0	0	0	8.08104	0
2.11309	0	0	--	0	0	0	8.28605	0
2.13073	0	0	--	0	0	0	0	0
2.14838	0	0	--	0	0	0	0	0
2.16603	0	0	--	0	0	0	0	0
2.18367	0	0	--	0	0	0	0	0
2.20334	0	0	--	0	0	0	0	0
2.22096	0	0	--	0	0	0	0	0
2.23861	0	0	--	0	0	0	0	0
2.25625	0	0	--	0	0	0	0	0
2.2739	0	0	--	0	0	0	0	0
2.29155	0	0	--	0	0	0	0	0
2.30919	0	0	--	0	0	0	0	0
2.32684	0	0	--	0	0	0	0	0
2.34446	0	0	--	0	0	0	0	0
2.36211	0	0	--	0	0	0	0	0
2.37975	0	0	--	0	0	0	0	0
2.39739	0	0	--	0	0.00019	0	0	0
2.41504	0	0	--	0	0.000194	0	0	0
2.43269	0	0	--	0	0	2.34656	0	0
2.45034	0	0	--	0	5.18871	2.40609	0	0
2.46798	0	0	--	0	5.32034	0	0	0
2.48561	0	0	--	0	0	0	0	0
2.50327	0	0	--	0	0	0	0	7.21427
2.52091	0	0	--	0	0	0	0	7.39729
2.53857	0	0	--	0	0	8e-06	0	0
2.55618	0	0	--	0	0	8e-06	0	0
2.57383	0	0	--	0	0	0	0	0
2.59147	0	0	--	0	0	0	0	0
2.60911	0	0	--	0	0	0	0	0
2.62676	0	0	--	0	0	0	0	0
2.64439	0	0	--	0	0	0	0	0
2.66203	0	0	--	0	0	0	0	0
2.67968	0	0	--	0	0	0	0	0
2.69732	0	0	--	0	0	0	0	0
2.71497	0	0	--	0	0	0	0	0
2.73261	0	0	--	0	0	0	0	0
2.75026	0	0	--	0	0	0	0	0
2.7679	0	0	--	0	0	0	0	0
2.78555	0	0	--	0	0	0	0	0
2.80321	0	0	--	0	0	0	0	0
2.82085	0	0	--	0	0	0	0	0
2.83847	0	0	--	0	0	0	0	0
2.85612	0	0	--	0	0	0	0	0
2.87378	0	0	--	0	0	0	0	0
2.89142	0	0	--	0	0	0	0	0
2.90906	0	0	--	0	0	0	0	0
2.92671	0	0	--	0	0	0	0	0
2.94435	0	0	--	0	0	0	0	0
2.96199	0	0	--	0	0	0	0	0
2.97963	0	0	--	0	0	0	0	0
2.99728	0	0	--	0	0	0	0	0
3.01493	0	0	--	0	0	0	0	0
3.03257	0	0	--	0	0	0	0	0
3.05019	0	0	--	0	0	0	0	0
3.06783	0	0	--	3.48608	0	0	0	0
3.08548	0	0	--	3.57452	0	0	0	0
3.10313	0	0	--	0	0	0	0	0
3.12077	0	0	--	0	0	0	0	0
3.1384	0	0	--	0	0	0	0	0
3.15604	0	0	--	0	0	0	0	0
3.1737	0	0	--	0	0	1.55636	0	0
3.19135	0	0	--	0	0	1.59585	0	0
3.20899	0	0	--	0	0	0	0	1.51398
3.22663	0	0	--	0	0	6.19283	0	1.55239
3.24427	0	0	--	0	0	6.34994	0	5.06215
3.26192	0	0	--	0	0	0	0	5.19057
3.27957	0	0	--	0	0	0	0	0
3.29721	0	0	--	0	0	0	0	0
3.31486	0	0	--	0	0	0	0	0
3.33249	0	0	--	0	0	0	0	0
3.35013	0	0	--	0	0	0	0	0
3.36777	0	0	--	0	0	0	0	0
3.38541	0	0	--	0	0	0	0	0
3.40306	0	0	--	0	0	0	0	0
3.42071	0	0	--	0	0	0	0	0
3.43834	0	0	--	0	0	0	0	0
3.45598	0	0	--	0	0	0	0	0
3.47364	0	0	--	0	0	0	0	0
3.49128	0	0	--	0	0	0	0	0
3.50893	0	0	--	0	0	0	0	0
3.52657	0	0	--	0	0	0	0	0
3.54422	0	0	--	0	0	0	0	0
3.56186	0	0	--	0	0	0	0	0
3.57951	0	0	--	0	0	0	0	0
3.59713	0	0	--	0	0	5.3e-05	0	0
3.61477	0	0	--	0	0	5.4e-05	0	0
3.63242	0	0	--	0	0	0	0	0
3.65006	0	0	--	0	0	0	0	0
3.66771	0	0	--	0	0	0	0	0
3.68535	0	0	--	0	0	0	0	0
3.70301	0	0	--	0	0	0	5.14273	0
3.72065	0	0	--	0	0	0	5.27319	0
3.73828	0	0	--	0	0	0	0	0
3.75592	0	0	--	0	0	0	0	0
3.77358	0	0	--	0	0	0	0	0
3.79122	0	0	--	0	0	0	0	0
3.80884	0	0	--	0	0	0	0	0
3.82649	0	0	--	0	0	5e-06	0	0
3.84414	0	0	--	0	0	5e-06	0	0
3.86178	0	0	--	0	0	0	0	0
3.87942	0	0	--	0	0	0	0	0
3.89707	0	0	--	0	0	0	0	0
3.9149	0	0	--	0	0	0	10.7856	0
3.93254	0	0	--	0	0	0	11.0592	0
3.95019	0	0	--	0	0	0	0	0
3.96783	0	0	--	0	0	0	0	0
3.98547	0	0	--	0	0	0	0	0
4.00313	0	0	--	0	0	0	0	0
4.02077	0	0	--	0	0	0	0	0
4.03843	0	0	--	0	0	0	0	0
4.05607	0	0.88643	--	0	0	0	0	0
4.0737	0	0.90892	--	0	0	0	0	0
4.09134	0	0	--	0	0	0	0	0
4.10898	0	0	--	0	0	0	0	0
4.12662	0	0	--	0	0	0	0	0
4.14427	0	0	--	0	0	0	0	0
4.16191	0	0	--	0	0	0	0	0
4.17955	0	0	--	0	0	0	0	0
4.19719	0	0	--	0	0	0	0	0
4.21483	0	0	--	0	13.6974	0	0	0
4.23248	0	0	--	0	14.0449	0	0	0
4.25012	0	0	--	0	0	0	0	0
4.26777	0	0	--	3.42026	0	0	0	0
4.28541	0	0	--	3.50702	0	0	0	0
4.30307	0	0	--	0	0	0	0	0
4.32072	0	0	--	0	0	0	0	0
4.33834	0.000319	0	--	0	0	0	0	0
4.35599	0.000327	0	--	0	0	0	0	0
4.37364	0	0	--	4.36569	0	0	0	0
4.39128	0	0	--	4.47644	0	0	0	0
4.40892	0	0	--	0	0	0	0	0
4.42656	0	0	--	0	0	0	0	0
4.44421	0	0	--	0	0	0	3.80468	0
4.46185	0	0	--	0	0	0	3.9012	0
4.4795	0	0	--	0	0	0	0	0
4.49714	0	0	--	0	0	0	0	0
4.51479	0	0	--	0	0	0	0	0
4.53243	0	0	--	0	0	0.00117	0	0
4.55007	0	0	--	0	0	0.0012	0	0
4.56772	0	0	--	0	0	0	0	0
4.58537	0	0	--	0	0	0	0	0
4.603	0	0	--	0	0	8e-06	0	0
4.62064	0	0	--	0	0	8e-06	0	0
4.63827	0	0	--	0	1.72551	0	0	0
4.65591	0	0	--	4.04541	1.76929	0	2.5e-05	0
4.67356	0	0	--	4.14804	1e-05	0	2.6e-05	0
4.6912	0	0	--	0	0	0	0	0
4.70884	0	0	--	0	0	0	0	0
4.72649	0	0	--	0	0	0	0	0
4.74413	0	0	--	0	0	0	0	0
4.76178	0	0	--	0	0	0	0	0
4.77942	0	0	--	0	0	0	0	0
4.79706	0	0	--	0	0	0	0	0
4.81471	0	0	--	0.65534	0	0	0	0
4.83236	0	0	--	0.67197	0	0	0	0
4.85	0	0	--	0	0	0	0	0
4.86764	0	0	--	0	0	0	0	0
4.88528	0	0	--	0	0	0	0	0
4.90294	0	0	--	0	0	0	0	0
4.92058	0	0	--	0	0	0	0	0
4.93821	0	0	--	0	0	0	0	0
4.95585	0	0	--	0	0	0	0	0
4.97351	0	0	--	0	0	0	0.81992	0
4.99115	0	0	--	0	0	0	0.84072	0
5.0088	0	0	--	0	0	0	0	0
5.02644	0	0	--	0	0	0	0	0
5.04409	0	0	--	0	0	0	0	0
5.06173	0	0	--	0	0	0	0	0
5.07937	0	0	--	0	0	0	0	0
5.09702	0	0	--	0	0	10.1761	0	0
5.11466	0	0	--	0	0	10.4342	0	0
5.13231	0	0	--	0	0	0	0	0
5.14993	0	0	--	0	0	0	0	0
5.16757	0	0	--	0	0.66755	0	0	1.28639
5.18521	0	0	--	0	0.68448	0	0	1.31902
5.20287	0	1.48796	--	0	0	0	0	0
5.22052	0	1.52571	--	0	0	0	0	0
5.23819	0	0	--	0	0	0	0	0
5.2558	0	0	--	0	0	0	0	0
5.27345	0	0	--	0	0	0	0	0
5.2911	0	0	--	0	0	0	0	0
5.30874	0	0	--	0	0	0	0	0
5.32636	0	0	--	0	0	0	52.6516	0
5.34401	0	0	--	0	0	1.29514	53.9873	0
5.36165	0	0	--	0	0	1.328	0	0
5.37929	0	0	--	0	0	0	0	0
5.39694	0	0	--	0	0	0	0	0
5.41458	0	0	--	0	0	0	0	0
5.43223	0	0	--	0	0	0	5.61416	0
5.44987	0	0	--	0	0	0	5.75659	0
5.46751	0	0	--	0	0	0	0	0
5.48516	0	0	--	0	0	0	0	0
5.50281	0	0	--	8.8e-05	0	0	0	0
5.52045	0	2.48423	--	9.1e-05	0	0	0	0
5.5381	0	2.54725	--	0	0	0	0	0
5.55574	0	0	--	0	0	0	0	0
5.57337	0	0	--	0	0	0	0	0
5.59101	0	0	--	0	0	0	0	0
5.60944	0	0	--	0	0	0	0	0
5.62708	0	0	--	0	0	0	0	0
5.64472	0	0	--	0	0	0	0	0
5.66236	0	1.72968	--	0	0	0	0	0
5.68001	0	1.77356	--	0	0	0	0	0
5.69765	0	0	--	0	0	0	0	0
5.71529	0	0	--	0	0	0	0	0
5.73293	0	0	--	0	0	0	0	0
5.75057	0	0	--	0	0.70944	0	0	0
5.76821	0	0	--	0	0.72744	0	0	0
5.78586	0	7.91432	--	0	0	0	0	0
5.80351	0	8.11509	--	0	0	0	0	0
5.82116	0	0	--	0	0	0	0	0
5.83881	0	0	--	0	0	0	0	0
5.85645	0	0	--	0	0	0	0	0
5.8741	0	0	--	0	0	0	0	0
5.89174	0	0	--	0	0	0	0	2.07385
5.90937	0	0	--	0	0	0	0	2.12646
5.92702	0	0	--	0	0	0	0	0
5.94467	0	0	--	0	0	0	0	0
5.96231	0	0	--	0	0	0	0	0
5.97996	0	11.1835	--	0	0	0	0	0
5.9976	0	11.4672	--	0	0	0	0	0
6.01524	0	0	--	0	0	0	0	0
6.03289	0	0	--	0	0	0	0	0
6.05051	0	0	--	0	0	0	0	0
6.06816	0	0	--	0	0	0	0	0
6.08581	0	0	--	0	0	0	0	0
6.10346	0	0	--	0	0	0	0	0
6.12111	0	0	--	0	0	0	0	0
6.13877	0	0	--	0	0	0	0	0
6.15639	0	0	--	0	0	0	0	0
6.17402	0	0	--	0	0	0	0	0
6.19166	0	0	--	0	0	0	0	0
6.20931	0	0	--	0	0	0	2.4e-05	0
6.22695	0	0	--	0	0	0	2.5e-05	0
6.2446	0	0	--	0	0	0	0	0
6.26224	0	0	--	0	0	0	0	0
6.27989	0	0	--	0	0	0	0	0
6.29753	0	0	--	0	0	0	0	0
6.31518	0	0	--	0	0	0	0	0
6.33282	0	0	--	0	0	0	0	0
6.35046	0	0	--	0	0	0	0	0
6.3681	0	0	--	0	0	0	0	0
6.38575	0	0	--	0	0	0	0	0
6.4034	0	0	--	0	0	0	0	0
6.42104	0	0	--	0	0	0	0	0
6.4387	0	0	--	0	0	0	0	0
6.45632	0	24.8359	--	0	0	0	0	0
6.47397	0	25.4659	--	0	0	0	0	0
6.49161	0	10.6686	--	0	0	0	0	2.29492
6.50925	0	10.9393	--	0	0	0	0	2.35314
6.5269	0	0.31688	--	0	0	0	0	3.70293
6.54454	0	14.8899	--	0	0	0	0	3.79687
6.56219	0	14.9345	--	0	0	0	0	3.55223
6.57981	0	0	--	5.7e-05	0	0	0	3.64235
6.59746	0	0	--	5.9e-05	0	0	0	0
6.6151	0	0.11175	--	0	0	0	0	0
6.63274	0	0.11458	--	0	0	0	0	0
6.65039	0	0	--	0	0	0	0	0.9312
6.66803	0	0	--	0	0	0	0	0.95482
6.68568	0	0	--	0	0	0	0	0
6.70333	0	0	--	0	0	0	0	0
6.72097	22.901	0	--	0	0	0	0	0
6.7386	23.4819	0	--	0	0	0	0	0
6.75624	0	0	--	0	0	0	0	0
6.7739	0	0	--	0	0	0	0	21.3673
6.79155	0	0	--	0	0	0	0	21.9093
6.80919	7.20801	0	--	0	0	0	0	0
6.82683	7.39086	0	--	0	0	0	0	0
6.84448	0	0	--	0	0	0	0	0
6.86212	0	0	--	0	0	0	0	0
6.87977	0	0	--	0	0	0	0	0
6.89739	0	0	--	0	0	0	0	0
6.91504	2.07161	0	--	0	0	0	0	0
6.93269	2.12417	0	--	0	0	0	0	0
6.95033	0	0	--	0	0	0	0	0
6.96798	178.698	0	--	0	0	0	0	0
6.98562	189.368	0	--	0	0	0	3e-06	0
7.00328	26.7122	0	--	0	0	0	3e-06	0
7.02089	27.5487	0	--	0	1.76693	0	0	0
7.03855	25.1665	0	--	0	1.81176	0	0	0
7.05619	33.2516	0	--	0	0	0	0	0
7.07386	28.0405	0	--	0	0	0	0	0
7.09148	12.8085	0	--	0	0	0	0	0
7.10912	3e-06	0	--	0	0	0	0.565	0
7.12677	0.99618	0	--	0	0	0	0.57933	0
7.14441	1.02145	0	--	0	0	0	0	0
7.16205	0	0	--	0	0	0	0	0
7.17969	0	0	--	0	0	0	0	0
7.19733	0	0	--	0	0	0	0	0
7.21498	0	0	--	0	0	0	0	0
7.23262	0	0	--	0	0	0	8.46668	0
7.25027	0	0	--	0	0	0	8.68146	0
7.26792	0	0	--	0	0	0	0	0
7.28556	0	0	--	0	0	0	0	0
7.30478	0	0	--	0	0	0	0	0
7.3224	0	0	--	0	0	0	0	0
7.34006	0	0	--	0	0	0	0	0
7.3577	0	0	--	0	0	0	0	0
7.37532	0	0	--	0	0	0	0	0
7.39296	0	0	--	0	0	0	0	0
7.4106	0	0	--	0	0	0	0	0
7.42825	39.2422	0	--	0	0	0	0	0
7.44589	90.1948	0	--	0	0	0	0	0
7.46353	210.058	0	--	0	0	0	0	0
7.48118	616.56	0	--	0	0	0	0	0
7.49882	1221.64	0	--	0	0	0	0	0
7.51647	2031.71	0	--	0	0	0	0	0
7.53411	3643.05	0	--	2.10348	0	0	0	0
7.55175	5929.56	0	--	2.15685	0	0	0	0
7.56941	9117.31	0	--	0	0	0	0	0
7.58706	12905.4	0	--	0	0	0	0	0
7.6047	15963.2	0	--	0	0	0	0	0
7.62234	17504.1	0	--	0	0	0	0	0
7.63997	17821.7	0	--	0	0	0	0	0
7.65761	16858.5	0	--	0	0	0	0	0
7.67526	13906	0	--	0	0	0	0	0
7.69291	10017.8	0	--	0	0	0	0	0
7.71055	6998.9	0	--	0	0	0	8.30136	0
7.72819	5104.48	8.9e-05	--	0	0	0	8.51196	0
7.74584	3521	2.04435	--	0	0	0	0	0
7.76348	2474.95	2.09612	--	0	1.79361	0	0	0
7.78113	1073.9	0	--	0	30.5586	0	0	0
7.79877	741.086	0	--	0	29.448	0	0	0
7.81641	608.488	0	--	0	0	0	0	1.06647
7.83406	222.63	0	--	0	0	0	0	1.09352
7.8517	156.865	0	--	0	3.13601	0	0	0
7.86936	169.274	0	--	0	4.50828	0	0	0
7.88698	79.5384	0	--	0	78.0209	0	0	0
7.90463	39.9997	0	--	0	140.196	12.6133	0	0
7.92227	21.7066	0	--	0	63.1408	12.9333	0	1.69837
7.93991	81.2101	0	--	0	0	0	0	1.74145
7.95755	100.796	0	--	0	0	8.4645	0	0
7.97519	104.8	0	--	0	0	8.67923	0	0
7.99283	86.6865	0	--	0	0	0	0	0
8.01048	23.1882	0	--	4.1485	0	0	9.18526	0
8.02812	53.6309	0	--	4.54763	0	0	9.41828	0
8.04577	53.7465	0	--	0.30134	0	0	0	0
8.06341	60.8284	0	--	0	0	0	0	0
8.08105	69.9452	0	--	0	0	0	0	0
8.0987	43.0673	0	--	0	0	0	0	0
8.11634	42.818	0	--	0	32.4225	0	0	0
8.13399	29.3073	0	--	0	33.245	7.99761	3.67267	0
8.15163	68.1779	6.65197	--	0	0	8.2005	3.76584	0
8.16929	46.8399	11.644	--	0	0	0	0	0
8.18693	6.78261	25.8581	--	0	0	0	0	0
8.20457	13.5442	201.054	--	0	0	0.000176	15.9928	0
8.2222	15.3576	334.534	--	0	0	0.00018	16.3985	0
8.23985	16.1101	519.845	--	0	0	0	0	0
8.25749	9.45368	1175.91	--	0	0	0	0	0
8.27514	2.02786	2619.6	--	0	0	0	4.11839	0
8.29279	0	4775.66	--	0	4.00029	0	4.22287	0
8.31043	0	7506.42	--	0	4.10177	0	0.45508	0
8.32807	0	11167.5	--	0	0	0	0.46663	0
8.34569	0	14324.8	--	0	0	0	0	0
8.36334	0	18253.1	--	0	0	0	0	0
8.38098	7.03451	21016.1	--	0	0	6.36529	0	0
8.39863	7.21297	19188.1	--	0	0	87.166	0	0
8.41627	43.1568	17464.2	--	0	0	187.993	0	0
8.43392	44.2516	14636.8	--	1.00574	0.59862	483.786	0	0
8.45156	5.72944	11135.2	--	1.03125	0.61381	840.199	0	0
8.46922	18.111	8115.3	--	0	0	1175.2	0	0
8.48687	22.3294	4926.32	--	0	0	2383.87	0	0
8.50449	10.031	3650.43	--	0	0	3551.7	0	0
8.52213	0.03785	2746.05	--	0	0	4193.48	0	0
8.53979	0.03881	2309.83	--	0	25.042	6453.15	0	0
8.55743	0		4245.98	0	53.0839	10228.5	0	0
8.57507	0		9738.71	0.62244	196.806	13199.6	0	0
8.59272	0		18856.6	20.8898	360.58	16167.8	0	0
8.61036	0		33038.7	123.332	847.66	20670.4	0	0
8.62801	0		53167.6	337.567	2235.56	27925.5	0.000458	0
8.64565	0		70757.9	584.146	5830.07	33160.6	0.000469	0.32235
8.6633	0		83708.7	960.904	16573.7	35207.2	3.49186	0.33052
8.68091	0		93100.6	1238.73	48131.9	40118.5	4.21183	0
8.69856	0		91862.8	1403.1	123688	47138.6	0.64741	0.45375
8.7162	0		86528.4	1727.24	288938	56399.4	0	19.1543
8.73385	0		76163.8	2019.93	561762	71530.5	0.48266	19.1632
8.7515	0		54572.9	2003.51	858021	81707.7	0.49491	10.3647
8.76915	0.000138		34797.1	1680.07	1.05298e+06	84318.3	0	10.6276
8.78679	0.000141		20833.5	1205.12	1.15223e+06	79359.9	0	0
8.80444	0		12525.7	771.095	1.21129e+06	63231	0	0
8.82208	0		7923.95	423.19	1178706	54402.3	0	0
8.83971	0		3683.03	354.882	1.08413e+06	49130.2	0	0
8.85736	0		2026.24	241.532	956197	37934.7	0	0
8.875	0		1560.98	209.1	769781	29520.6	0	0
8.89264	0		788.393	84.4461	596895	21865.9	0	0
8.91029	0		468.82	31.8697	428212	14858	0	0
8.92794	0		436.384	22.1446	257800	10596.9	0	0
8.94559	0		488.319	15.1919	160765	7437.44	0	0
8.96321	10.3301		461.491	0.08673	106821	4643.44	0	0
8.98085	10.5921		335.689	0	61279.2	3583.6	0	0
8.9985	0		324.195	0	39234.5	3133.22	0	0
9.01686	0		253.578	5.85738	25698.9	2064.83	0	0
9.03451	0		161.28	19.42	14646.5	1693.09	0	0
9.05215	0		97.2863	13.7543	8483.04	1341.23	4e-06	0
9.0698	0		167.387	0	5659.93	756.029	4e-06	0
9.08745	0		304.513	0	4488.44	706.223	0	0
9.1051	0		210.938	0	3234.36	691.97	0	0
9.12274	0		101.953	0	2437.73	414.323	0	0
9.14037	0		166.387	0	1805.22	406.786	0	0
9.15801	0		210.683	0	1782.66	316.296	0	0
9.17565	0		150.533	0.06581	1694.34	289.791	0	0
9.19329	0		121.08	0.06748	1422.25	268.892	0	0
9.21093	0		179.114	0	1588.62	135.497	0	0
9.22857	0		172.316	0	1547.21	283.644	0	0
9.24622	0		205.858	0	1333.3	346.712	0	0
9.26386	0		205.632	0	1487.91	196.46	0	0
9.28151	0		250.393	0	1455.08	136.744	0	0
9.29915	0		208.768	0	1125.67	194.164	0	0
9.31679	0		134.5	0	1266	157.164	0	0
9.33444	0		174.926	0	1349.56	136.284	0	0
9.35208	0		120.233	0	1335.66	116.524	0	0
9.36973	0		119.432	0	1098.45	91.6049	0	0
9.38737	0		167.44	0	1170.72	112.635	0	0
9.40502	0		194.862	0	1339.05	74.2308	0	0
9.42266	0		189.141	0	951.468	97.9718	0	0
9.44032	0		88.0231	0	844.271	106.607	0	0
9.45796	0		103.013	0	1134.21	146.522	0	0
9.47558	0		107.274	0	1108.73	176.034	0	0
9.49322	0		68.2634	0	1358.23	60.2386	0	0
9.51086	0		81.9776	0	1266.68	120.167	0	0
9.52851	0		76.4423	0	900.333	136.91	0	0
9.54615	0		125.512	0	742.907	18.2352	0	0
9.56379	0		134.277	0	595.297	9.32131	0	0
9.58144	0		79.8801	0	557.312	18.3408	0	0
9.59909	0		65.7808	0	580.121	63.6501	0	0
9.61673	0		51.7854	0	519.441	82.5988	0	0
9.63438	0		42.9766	0	574.042	69.4858	0	0
9.65202	0		34.2232	0	486.474	72.8781	0	0
9.66968	0		40.4621	0	450.569	46.973	0	0
9.6873	0		79.4028	0	504.429	12.9888	0	0
9.70495	0		46.9104	0	394.057	5.09676	0	0
9.72259	0		35.156	0	346.304	0	0	0
9.74025	0		41.0171	0	455.415	3.51609	0	0
9.75789	0		45.6812	0	563.325	11.8868	0	0
9.77551	0		74.7524	0	614.177	70.8414	0	2.56783
9.79316	0		70.1206	0	484.239	105.782	0	2.63297
9.8108	0		41.2466	0	327.973	70.2568	0	0
9.82844	0		45.7825	0	383.381	47.4097	0	0
9.84609	0		73.8824	0	349.097	28.5554	0	0
9.86373	0		55.8641	0	305.883	29.8509	0	0
9.88137	0		43.1972	0	287.006	22.4041	6e-06	0
9.89901	0		63.9247	0	398.81	0	7e-06	0
9.91666	0		70.9574	0	336.846	16.1116	0	0
9.93431	0		44.4228	0	302.497	36.4843	0	0
9.95195	0		19.0354	0	235.739	28.2999	0	0
9.9696	0		6.64513	0	169.762	32.7496	0	0
9.98724	0		28.7487	0	255.325	32.0453	0	0
10.0049	0		33.4146	0	359.605	7.55189	0	0
10.0225	0		21.8625	0	342.269	0.70279	0	0
10.0402	0		24.5556	0	512.365	30.1465	0	0
10.0578	0		60.8307	0	550.193	30.9112	0	0
10.0755	0		79.4949	0	370.752	0	0	0
10.0931	0		31.8147	0	336.373	0	0	0
10.1108	0		4.30257	0	422.048	0	0	0
10.1284	0		0	0	331.793	0	38.6152	0
10.146	0		0	0	187.011	0	39.5949	0
10.1637	0		10.4704	0	279.321	0	0	0
10.1813	0		10.736	0	325.772	0	0	0
10.199	0		0	0	302.779	0	0	0
10.2166	0		0	0	267.608	0	0	0
10.2342	0		9.02095	0	333.177	0	0	0
10.2519	0		47.9186	0	374.467	0	0	0
10.2696	0		43.1045	0.41506	243.326	0	0	0
10.2872	0		11.8957	0.42559	183.187	47.811	0	0
10.3048	0		31.2931	0	161.44	49.0239	0	0
10.3225	0		25.9191	0	83.3107	0	0	0
10.3401	0		2.68108	0	108.582	0	0	0
10.3577	0		9.0582	0	96.407	0	0	0
10.3754	0		9.28799	0	134.802	0	0	0
10.393	0		6.15377	0	233.221	0	0	0
10.4107	0		6.30988	0	146.188	13.794	0	0
10.4283	0		24.7912	0.000177	83.2351	39.4524	0	0
10.446	0		37.4444	0.000181	79.5386	25.9506	0	0
10.4636	0		15.4135	0	125.505	0	0	0
10.4813	0		7.58235	0	188.22	4e-05	0	0
10.4989	0		5.1731	0	104.224	0	0	0
10.5165	0		0	0	110.816	0	6.28691	0
10.5342	0		3.21189	8.00378	160.398	0	6.4464	0
10.5518	0		5.95413	8.20683	69.3483	0	0	0
10.5695	0		2.72826	0	99.7569	1.7172	0	0
10.5871	0		0.93387	0	137.72	1.76076	0	0
10.6048	0		0.95756	0	97.7332	0	0	0
10.6224	0		0	0	89.6538	0	0	0
10.6401	0		0	0	71.961	0	0	0
10.6577	0		0	0	113.819	1.86401	0	0
10.6753	0		0	0	90.2233	1.9113	0	0
10.693	0		4.6663	0	66.7681	1.05055	0	0
10.7114	0		23.1097	0	78.9326	17.9707	0	0
10.7291	0		18.7899	0	58.2756	20.0108	0	0
10.7467	0		8.98446	0	151.673	2.79507	0	0
10.7644	0		9.21239	0	129.217	3e-05	4e-06	0
10.782	0		0	0	59.6677	0	4e-06	0
10.7997	0		0	0	66.9592	0	0	0
10.8173	0		0	0	69.3716	0	0	0
10.8349	0		0	0	117.071	0	0	0
10.8526	0		0	0	114.356	5.09826	0	0
10.8702	0		0	0	52.68	25.0152	0	7.03063
10.8879	0		0	0	72.1583	39.6637	0	7.20899
10.9055	0		0	0	69.5795	20.5293	0	0
10.9232	0		0	0	16.9635	11.7521	0	0
10.9408	0		0	0	38.6677	36.4712	0	0
10.9585	0		0	0	68.3247	59.8031	0	0
10.9761	0		0	0	41.0472	29.3238	0	0
10.9938	0		0	0	99.2005	0	0	0
11.0114	0		8.92842	0	99.6514	0	0	0
11.029	0		9.15495	0	100.474	0	0	0
11.0467	0		0	0	123.04	15.5104	0	0
11.0643	0		0	0	157.666	15.9039	0	0
11.082	0		0	0	145.28	0	0	0
11.0996	0		0	0	39.3284	0	18.5414	0
11.1173	0		0	0	67.8756	0	19.0118	0
11.1349	0		5.6323	0	72.6061	0	0	0
11.1525	0		5.77518	0	42.6593	0	0	0
11.1702	0		13.496	0	12.3407	0.52719	4e-06	0
11.1878	0		13.8385	0	27.7469	0.54056	0	0
11.2055	0		0	0	37.1788	1.47198	0	0
11.2231	0		0	11.9645	94.8114	1.50932	0	0
11.2408	0		12.4187	65.3254	96.2948	0	0	0
11.2584	0		12.7337	77.6399	27.9211	0	0	0
11.276	0		2.41144	112.401	43.6313	0	0	0
11.2937	0		4.8463	98.1865	36.419	0	18.1976	0
11.3113	0		2.4339	11.1903	13.9243	0	52.4342	0
11.329	0		11.1952	41.5269	0	0	60.9557	0
11.3466	0		11.4792	42.3482	1.2e-05	0	52.8297	0
11.3643	0		0	45.3235	0.000185	2.91357	116.55	0
11.3819	0		0	41.932	0.000827	14.7216	177.021	0
11.3996	0		0	0	0.000848	12.0318	182.714	0
11.4172	0		0	4.12407	8.53107	0	376.301	0
11.4349	0		0	4.2287	23.7532	0	541.147	0
11.4525	0		0	0	15.3864	0	539.336	0
11.4701	0		0	0	19.2606	0	422.882	0
11.4878	0		0	0	19.7493	0	374.216	0
11.5054	0		0	0	13.3753	0	288.756	0
11.523	0		0	0	25.4121	0	65.8605	0
11.5407	0		1.55533	3.48033	17.4673	0	39.1013	0
11.5584	0		1.59479	3.56862	13.1425	1.62715	60.4177	0
11.576	0		18.2286	0	24.5772	1.66843	92.6137	0
11.5936	0		18.691	0	71.2148	0	60.0616	0
11.6113	0		0	0	77.0779	0	59.8341	0
11.6289	0		0	0	46.3909	0	89.1164	0
11.6465	0		0	10.6202	77.9344	0	57.2433	0.000114
11.6642	0		0	10.8896	63.7949	0	35.1876	0.000117
11.6818	0		0	0	8.47369	0	11.2289	0
11.6995	0		0	0	3.3153	0	0	4.88189
11.7171	0		0	0	34.3842	0	0	18.3409
11.7348	0		0	0	32.5754	0	0	31.1441
11.7524	0		0	0	35.0595	0	3.61921	72.8081
11.7701	0		0	0	52.4771	1.5e-05	3.71102	71.3135
11.7877	0		0	0	54.7451	1.5e-05	18.3873	41.8026
11.8054	0		0	0	45.1919	0	18.8538	98.8675
11.823	0		0	0	9.20643	0	0.000305	85.5708
11.8406	0		0	0	0	0	6.94237	32.5228
11.8583	0		0	0	0	0	22.4884	21.4012
11.8759	0		0	0	15.2315	0	19.1896	11.1572
11.8935	0		1.14044	0	15.8771	0	4.48672	11.4403
11.9112	0		1.16937	0	15.1223	0	0	20.0932
11.9289	0		0	0	15.2335	0	39.063	25.6958
11.9465	0		0	0	2.13315	0	62.5793	27.0568
11.9641	0		0.67967	0	2.18726	0	60.4934	22.3888
11.9818	0		0.69691	0	0	0	111.517	19.3543
11.9994	0		0	0	34.2736	0	75.0281	63.4349
12.0171	0		0	0	48.167	0	0	73.4237
12.0347	0		0	0	13.3544	0	14.2136	93.2734
12.0523	0		0	0	8.1745	0	74.8271	132.581
12.07	0		0	0	33.5065	21.0775	70.0347	328.45
12.0876	0		0	0	34.4576	23.0809	71.0156	526.702
12.1053	0		0	0	8.91616	1.50577	87.5405	718.498
12.1229	0		0	0	0	0	122.199	1026.09
12.1406	0		0	0	3.49719	0	147.204	1818.76
12.1582	0		0	0	3.58591	0	75.9224	2841.92
12.1759	0		0	0	0.8612	0	112.504	3281.94
12.1935	0		0	0	0.88305	0	149.729	4058.43
12.2111	0		0	0	0.47102	0	160.489	4725.22
12.2288	0		0	0	6.47487	0	119.019	4839.91
12.2464	0		0	0	64.7603	0	29.2653	5127.76
12.2641	0		0	0	61.7728	0	57.1664	5172.96
12.2817	0		0	0	1.55833	0	72.3725	4539.46
12.2994	0		0	0	0	0	33.2704	4081.06
12.317	0		0	0	0	0	25.9986	3290.73
12.3346	0		0	0	3.94376	0	111.517	2888.92
12.3523	0		0	0	40.8987	1.6202	136.852	2308.39
12.3699	0		0	0	38.6864	1.66131	52.8226	1673.57
12.3876	0		0	0	45.1697	4.32921	64.5987	1317.62
12.4079	0		0	0	53.382	4.43903	50.8839	965.47
12.4256	0		0	0	48.9945	0	42.4824	619.775
12.4432	0		0	0	52.2895	0	135.564	485.472
12.4609	0		1.44834	0	57.0975	0	179.929	372.075
12.4785	0		1.48508	0	85.687	0	101.942	411.607
12.4962	0		0	0	73.3421	0	68.9115	171.574
12.5138	0		0	0	72.1974	0	61.7853	53.3034
12.5315	0		0	0	77.7336	0	89.7325	58.3192
12.5491	0		0	0	50.9536	0	107.703	91.1085
12.5667	0		0	0	12.7459	0	28.1518	61.3937
12.5844	0		0	5.86097	0	0	26.9684	52.7583
12.602	0		0	6.00965	27.7529	0	102.486	65.0704
12.6197	0		0	0	46.7912	0	103.684	27.3517
12.6373	0		0	0	23.4244	0	44.7916	14.7108
12.655	0		0	0	34.5825	0	39.2775	25.5748
12.6726	0		0	0	70.0754	0	35.901	18.1571
12.6902	0		0	0	43.4567	0	16.7868	2.9716
12.7079	0		0	0	64.3957	0	14.1122	0
12.7255	0		0	0	107.824	0	14.4702	7.04356
12.7432	0		0	0	53.3871	0	0	8.19706
12.7608	0		0	0	7.9816	1.8e-05	22.2522	0.000172
12.7784	0		0	0	0	4.9209	27.8465	0
12.7961	0		0	0	0	5.04572	23.6165	0
12.8137	0		0	0	4.67034	0	53.9496	0
12.8314	0		0	0	7.54276	0	35.1872	0
12.849	0		0	0	85.3459	0	2.2871	0
12.8667	0		0	0	84.6156	0	72.1182	0
12.8843	0		0	0	31.082	0	76.3287	0
12.902	0		0	0	39.2359	0	27.977	0
12.9196	0		0	0	32.0495	0	23.9185	0
12.9373	0		0	0	25.1193	0	42.3703	0
12.9549	0		0	0.0001	0	0	56.526	0
12.9725	0		0	0.000102	0	0	13.4126	0
12.9902	0		0	0	0	0	0	0
13.0078	0		0	0	7.89572	0	0	0
13.0255	0		0	0	8.09602	0	0	0
13.0431	0		0	0	0	0	0	0
13.0608	0		0	0	0	0	0	0
13.0784	0		0.2274	0	0	0	0	3.76141
13.096	0		2.98312	0	0	0	0	3.85683
13.1137	0		2.81972	0	2.24553	0	0	0
13.1313	0		0	0	2.3025	0	0	0
13.149	0		0	0	3.1475	0	0	0
13.1666	0		0	0	3.22735	0	0	0
13.1842	0		0	0	0	0	0	0
13.2019	0		0	0	5.25681	0	0	0
13.2195	0		0	0	5.39017	0	0	0
13.2372	0		0	0	0	0	0	0
13.2548	0		16.6366	0	34.7718	0	0	0
13.2725	0		17.0586	0	87.6542	0	0	0
13.2901	0		0	0	63.0092	0	0	0
13.3078	0		0	0	30.7386	6.52266	0	0
13.3254	0		0	0	25.3004	6.68813	0	0
13.343	0		0	0	15.9564	0	0	0
13.3607	0		0	0	80.5785	0	0	0
13.3783	0		0	0	103.805	0	0	0
13.396	0		0	0	58.7701	0	0	30.7969
13.4136	0		0	0	33.6314	0	9e-06	31.5782
13.4313	0		0	0	24.4882	0	9e-06	0
13.4489	0		0	0	37.738	0	0	0
13.4665	0		0	0	61.0384	0	0	0
13.4842	0		0	0	61.6461	0	1.83186	0
13.5018	0		0	0	60.1981	0	1.87834	0
13.5195	0		0	0	177.196	0	0	4.31753
13.5371	0		0	0	179.401	0	0	4.42706
13.5548	0		0	0	79.8611	0	0	0
13.5724	0		0	0	115.523	0	0	0
13.59	0		0	0	74.3027	0	0	0
13.6077	0		0	0	89.3685	0.05788	0	0
13.6253	0		0	0	146.806	0.05935	0	0
13.643	0		0	0	74.8754	0	0	0
13.6606	0		0	0	33.9151	0	0	0
13.6783	0		0	0	103.624	0	0	0
13.6959	0		0	0	146.563	0	0	0
13.7135	0		0	0	114.157	0	0	0
13.7312	0		0	0	124.328	0	0	0
13.7488	0		0	0	141.828	0	0	0
13.7665	0		0	0	140.009	0	0	0
13.7841	0		6.09761	0	73.895	0	0	0
13.8018	0		6.2523	0	41.544	0	0	0
13.8194	0.51672		0	0	84.2587	0	0	1.2747
13.837	0.52982		2.56366	0	67.4306	0	0	1.30703
13.8547	0		2.6287	0	71.8303	3.3e-05	0	0
13.8723	0		0	0	68.8201	3.4e-05	0	0
13.89	0		0	0	33.9773	0	0	0
13.9077	0		0	0	59.8043	0	0	0
13.9253	0		0	0	194.57	0	0	0
13.9429	0		0	0	271.584	0	0	0
13.9606	0		0	2.95605	185.875	0	0	0
13.9782	0		0	3.03104	87.3211	0	0	0
13.9958	0		0	0	41.8938	0	0	0
14.0135	0		0	0	24.8495	0	0	0
14.0311	0		0	0	89.9899	0	0	4.629
14.0488	0		0	0	118.17	0	0	4.74644
14.0664	0		0	0	119.027	0	0	0
14.084	0		0	0	167.772	0	0	0
14.1037	0		0	0	97.8805	0	0	0
14.1214	0		0	0	27.3773	2.18845	0	0
14.139	0		0.10328	0	25.1259	2.24397	0	0
14.1566	0		0.1059	0	28.802	0	0	0
14.1743	0		0	0	7.13912	0	0	0
14.1919	0		0	0	18.7812	0	0	0
14.2096	0		0	0	20.7622	0	0	0
14.2272	0		0	0	42.1348	0	0	0
14.2449	0		0	2.65178	59.3698	0	0	0
14.2625	0		0	2.71905	141.957	0	0	0
14.2802	0		0	0	156.206	0	0	0
14.2978	0		0	0	37.6674	0	0	0
14.3154	0		0	0	33.6101	0	12.8804	0
14.3331	0		0	0	47.5079	0	13.2072	0
14.3507	0		0	0	63.2355	0	0	0
14.3684	0		0	0	48.0854	0	0	0
14.386	0		0	0	0.000104	0	0	0
14.4036	0		0	0	6.71841	0	0	3.59816
14.4213	0		0	0	11.6051	0	0	3.68944
14.439	0		0	0	19.1533	0	0	0
14.4566	0		0	0	28.4709	0	0	0
14.4742	0		0	0	29.0077	0	0	0
14.4919	0		0	0	23.2652	0	0	0
14.5095	0		0	0	28.9937	0	0	0
14.5271	0		0	0	37.7666	0	0	0
14.5448	0		0	0	19.0539	0	0	0
14.5624	0		0	0	8e-06	4e-05	0	1.21798
14.5801	0		0	0	14.4359	4.1e-05	0	1.24888
14.5977	0		0	0	18.2339	0	0	0
14.6154	0		0	0	8.58975	0	0	0
14.633	0		0	0	8.06791	0	0	0
14.6506	0		0	0	35.5975	0	0	0
14.6683	0		0	0	34.6716	0	0	0
14.6859	0		0	0	18.0537	3e-06	0	0
14.7036	0		3.16854	0	17.2631	3e-06	0	0
14.7212	0		3.24892	0	0	0	0	0
14.7389	0		0	0	2.97537	0	0	0
14.7565	0		4.528	0	53.8168	0	0	0
14.7742	0		4.64287	0.67846	107.017	0	0	0
14.7918	0		0	0.69568	74.6318	0	0	0
14.8094	0		0	0	18.7385	0	0	0
14.8271	0		0	0	0	0	0	0
14.8447	0		0	0	0	0	0	0
14.8624	0		0	0	0.000876	0	0	0
14.88	0		0	0	24.303	0	0	0
14.8977	0		0	0	24.9186	0	0	0
14.9153	0		0	0	0	0	0	0
14.9329	0		0	0	0	0	0	0
14.9506	0		0	0	0	0	0	0
14.9682	0		0	0	4.24848	0	0	0
14.9859	0		0	0	4.35626	0	0	0
15.0035	0		0	0	0	0	0	0.89648
15.0212	0		0	0	0	0	0	0.91922
15.0388	0		0	0	0	0	0	0
15.0565	0		0	0	0	0	0	0
15.0741	0		0	0	0	0	0	0
15.0917	0		0	0	15.5481	0	0	0
15.1094	0		0	0	51.8284	0	0	0
15.127	0		0	0	36.8741	0	0	0
15.1447	0		0	2.18281	0	0	0	0
15.1623	0		0	2.23819	0	0	0	0
15.1799	0		0	0	0	0	0	0
15.1976	0		0	0	0	0	0	0
15.2152	0		0	0	0	0	0	0
15.2329	0		0	0	0	16.5275	0	0
15.2505	0		0	0	0	16.9468	4.97639	0
15.2682	0		0	0	1.36851	0	5.10263	0
15.2858	0		0	0	1.40322	0	0	0
15.3035	0		0	0	0	0	0	2.24805
15.3211	0		0	0	0	0	0	2.30508
15.3387	0		0	0	0	0	0	0
15.3564	0		0	0	0	0	0	0
15.374	0		0	0	0	0	0	0
15.3917	0		0	0	0	0	0	0
15.4093	0		0	0	0	0	0	0
15.427	0		0	0	0.51002	0	0	0
15.4446	0		0	0	0.52296	0	0	0
15.4622	0		0	0	0	0	0	0
15.4799	0		0	0	0	0	0	0
15.4975	0		0	0	0	0	0	0
15.5152	0		0	0	0	0	0	0
15.5328	0		0	0	0	0.52291	0	0
15.5505	0		0	0	19.6415	0.53618	0	0
15.5681	0		0	0	20.1397	0	0	0
15.5858	0		0.52795	0	8.09475	5e-06	0	0
15.6034	0		0.54135	0	13.7435	6e-06	0	0
15.621	0		0	0	0	0	0	0
15.6387	0		0	0	0	0	0	0
15.6563	0		0	0	0	0	0	0
15.6739	0		0	0	0	0	0	0
15.6916	0		0	0	0	0	0	0
15.7092	0		0	0	0	0	0	0
15.7269	0		0	2.17911	0	0	0	0
15.7445	0		0	2.23439	0	0	43.6553	0
15.7622	0		0	0	0	0	44.7628	0
15.7798	0		0	0	0	0	0	0
15.7974	0		0	48.9729	0	0	0	0
15.8152	0		0	50.2152	0	0	0	0
15.8329	0		0	0	0	0	0	0
15.8505	0		0	0	0	0	0	0
15.8682	0		1.06647	0	0	0	0	0
15.8858	0		1.09352	0	0	0	0	0
15.9035	0		0	0	0	0	0	0
15.9211	0		0	0	0	1e-05	0	0
15.9387	0		0	0	0	1e-05	0	0
15.9564	0		0	0	0	0	0	0
15.974	0		0	0	12.2218	1.5e-05	0	0
15.9917	0		0	0	12.5319	2.1e-05	0	0
16.0093	0		0	0	1.48431	0	0	0
16.027	0		0	0	1.52197	0	0	0
16.0446	0		33.2656	0	0	0	11.1722	0
16.0622	0		34.1095	0	0	8.45366	11.4556	0
16.0799	0		0	0	0	8.66812	1.54223	0
16.0975	0		0	0	44.7668	0	1.58135	0
16.1152	0		4.02533	0	45.9025	14.634	0	0
16.1328	0		4.12744	0	0	15.0052	0	0
16.1504	0		0	0	0	0	0	0
16.1681	0		0	0	0	0	0	0
16.1857	0		0	0	0	0	0	0
16.2034	0		0	0	0	0	0	0
16.221	0		0	10.8777	0	0	0	0
16.2387	0		0	11.1537	0	72.7875	0	0
16.2563	0		0	0	0	74.634	0	0
16.274	0		1.98448	0	0	0	0	0
16.2916	0		2.03483	0	0	0	0	0
16.3093	0		0	0	0.00059	0	0	0
16.3269	0		0	0	8.34318	0	0	0
16.3446	0		0	0	8.55421	0	0	5.98651
16.3622	0		1.15113	0	9.28873	0	0	6.93649
16.3798	0		1.18033	0	20.9203	0	0	0.81836
16.3975	0		4.6987	0	64.496	0	0	0
16.4151	0		4.8179	0	63.9772	0	0	0
16.4327	0		0	0	10.0755	0	5.17781	0
16.4504	0		6.08451	0	0.000295	0	5.30917	0
16.468	0		6.23886	0	0	0	0	0
16.4857	0		0	0	0	0	0	0
16.5033	0		0	0	0	0	0	0
16.521	0		0	0	0	0	0	0
16.5386	0		0	0	0	0	0	0
16.5562	0		0	0	24.0828	0	0	0
16.5739	0		2.25853	0	24.6938	0	0	0
16.5915	0		2.31582	0	0	2.86844	0	0
16.6092	0		0	0	0	14.5453	0	0
16.6268	0		0	0	0	34.7811	0	0
16.6445	0		0	0	0	34.2374	10.8849	0
16.6621	0		0	0	0	11.0476	11.161	0
16.6797	0		0	0	0	0	0	0
16.6974	0		0	0	0	0	0	0
16.715	0		0	0	0	0	0	0
16.7327	0		0	0	0	0	0	0
16.7503	0		0	0	1.31425	0.46497	0	0
16.768	0		0	0	1.34759	0.47677	0	0
16.7856	0		0	0	0	0	0	0
16.8033	0		0	0	0	0	0	0
16.8209	0		0	0	0	0	0	0
16.8385	0		0	0	0	0	0	0
16.8562	0		0	0	10.8793	0	0	0
16.8738	0		4.54039	0	43.076	0	0	5.66176
16.8915	0		4.65558	0	75.7544	0	0	5.80539
16.9091	0		6.89505	0	43.0691	0	0	0
16.9267	0		7.06997	0	0.000196	0	8.7449	0
16.9444	0		0	0	0	0	8.82034	0
16.962	0		0	0	0	0	0	0
16.9797	0		0	0	0	0	0	0
16.9973	0		0	0	0	0	0	0
17.015	0		0	0	0	35.3524	0	0
17.0326	0		0	0	0	36.2492	8.1266	0
17.0503	0		0	0	0	42.767	8.33276	0
17.0679	0		0	0	0	60.3154	0	0
17.0856	0		0	0	0	17.5183	0	0
17.1032	0		0	0	6.70723	0	0	0
17.1208	0		0	0	6.87739	0	0	0
17.1385	0		0	0	0	0	0	0
17.1561	0		0	0	0	0	0	0
17.1738	0		0	0	1.35383	9.4e-05	5.70723	0
17.1914	0		0	0	1.38818	9.7e-05	5.85202	0
17.209	0		0	0	0	1.74744	0	0
17.2267	0		0	0	0	1.79177	0	0
17.2443	0		0	0	0.000438	1.9e-05	0	0
17.262	0		0	0	0.000449	0	1.40382	0
17.2796	0		0	0	0	0	1.43943	0
17.2973	0		0	0	0	0	0	0
17.3149	0		0	0	1.8e-05	0	0	0
17.3326	0		0	0	1.8e-05	0	0	0
17.3502	0		0	0	0	0	0	0
17.3678	0		0	0	0	0	0	0
17.3855	0		0	0	0	0	0	0
17.4031	0		0	0	0	0.30596	0	0
17.4208	0		0	0	2.83805	0.31373	0	0
17.4384	0		0	0	2.91005	0	3.88122	0
17.4561	0		0	0	0	8.05465	3.97968	0
17.4737	0		0	0	0	8.25899	4e-06	0
17.4914	0		0	0	0	0	4e-06	0
17.5098	0		0	0	0	0	0	0
17.5275	0		0	0	0	0	0	0
17.5451	0		0	0	0	0	0	0
17.5628	0		0	0	0	0	0	0
17.5804	0		9.66458	1.34376	0	0	0	0
17.598	0		26.4925	1.37785	0	0	0	0
17.6157	0		17.0035	0	0	6.43465	0	0
17.6333	0		0	0	0	37.4414	0	0
17.651	0		0	0	0	31.6259	0	0
17.6686	0		0	0	0	2.92675	0	0
17.6863	0		0	0	0	9.06657	0	0
17.7039	0		0	0	0	6.21807	0	0
17.7215	0		0	0	24.584	0	0	0
17.7392	0		0	0	29.4462	0	0	0
17.7569	0		0	0	4.34602	0	0	0
17.7745	0		0	0	0	0	0	0
17.7921	0		0	0	0	0	0	0
17.8098	0		0	0	0	0	0	0
17.8274	0		1.25685	0	0	0	0	0
17.8451	0		1.28873	0	0	0	0	0
17.8627	0		0	0	0	0	0	0
17.8803	0		0	0	0	0	0	0
17.898	0		0	0	0	0	0	0
17.9156	0		0	0	0	0	0	0
17.9333	0		0	0	10.1316	0	0	9.83238
17.9509	0		0	0	10.3887	0	0	10.0818
17.9686	0		0	0	3.5e-05	5.29373	0	0
17.9862	0		0	0	0	5.42802	0	0
18.0038	0		0	0	3e-06	0	0	0
18.0215	0		0	0	2.3e-05	0	0	0
18.0391	0		0	0	8.19123	0	0	0
18.0568	0		0	0	17.6681	0	0	0
18.0744	0		0	0	19.8994	0.000205	0	0
18.0921	0		0	0	61.3743	0.00021	0	0
18.1097	0		0	0	52.0515	0	0	0
18.1273	0		0	0	0	6.01163	0	0
18.145	0		0	0	0	55.5144	0	0
18.1626	0		0	0	7.87901	50.6022	0	0
18.1803	0		0	0	22.4713	0	0	0
18.1979	0		0	0	14.7575	0	0	0
18.2156	0		0	0	0	0	0	0
18.2332	0		0	0	0	0.98804	0	0
18.2509	0		0	0	0	1.0131	0	0
18.2685	0		0	0	0	0	0	0
18.2861	0		0	0	1.7e-05	0	0	0
18.3038	0		0	0	1.7e-05	0	0	0
18.3214	0		0	0	54.4732	9.47701	0	0
18.3391	0		0	0	62.9378	9.71743	0	0
18.3567	0		0	0	7.26238	0	0	0
18.3743	0		0	0	2.20358	0	0	0
18.392	0		0	0	43.6323	0	0	0
18.4096	0		0	0	42.4224	0	0	0
18.4273	0		0	0	9.5597	0	0	0
18.4449	0		0	0	9.80239	0	0	4.51418
18.4626	0		0	0	11.3572	0	0	4.6287
18.4802	0		3.71307	0	25.6216	0	0	0
18.4978	0		26.2227	0	41.1267	0	0	0
18.5155	0		22.9841	9.2e-05	28.5641	0	0	0
18.5331	0		0	9.4e-05	9.89433	0	0	0
18.5508	0		0	0	8.48498	0	0	0
18.5684	0		0	0	0	0	0	0
18.5861	0		0	0	0	0	0	0
18.6037	0		0	0	30.7785	1.57043	0	0
18.6213	0		0	0	38.4171	1.61027	0	0
18.639	0		17.1005	0	7.03177	0	0	2.39036
18.6566	0		17.5343	0	0	0	0	2.451
18.6743	0		0	0	0	0	0	0.26023
18.6919	0		0	0	0	0	0	0.26683
18.7096	0		0	0	0	0	0	0.41387
18.7272	0		0	0	20.7006	0	0	0.42437
18.7449	0		0	0	46.4449	0	7.12912	0
18.7625	0		0	0	25.859	0	7.30997	0
18.7802	0		0	0	0	0	0	0
18.7978	0		0	0	0	0	0	0
18.8154	0		0	0	22.8023	0.000103	0	2.7539
18.8331	0		0	0	39.995	0.000106	0	2.82377
18.8507	0		0	0	40.5049	0	0	0
18.8684	0		0	0	48.9926	0	0	0
18.886	0		0	0	25.5603	0	0.000319	0
18.9037	0		0	0	0	0	0.000327	0
18.9213	0		0	0	0	0	0	0
18.9389	0		0	0	0	0	0	0
18.9566	0		0	0	0	0	0	0
18.9742	0		4.36064	1.49701	2.90852	0	0	19.2452
18.9919	0		4.47126	5.52296	2.98231	0	0	19.7335
19.0095	0		0	4.08915	1.6157	2.69689	0	0
19.0271	0		0	0	1.65669	11.2406	0	0
19.0448	0		0	0	0	56.9949	0	0
19.0624	0		0	0	0	76.1071	6.55244	0
19.0801	0		0	0	0	27.2513	6.71867	0
19.0977	0		0	0	0	0	0	0
19.1154	0		0	0	5.18863	4.75882	0	0
19.133	0		0	0	5.32027	4.87954	0	0
19.1506	0		5.2e-05	0	0	0	0	0
19.1683	0		5.3e-05	0	0	0	0	0
19.1859	0		0	0	0	0	0	0
19.2063	0		0	0	0	0	0	0
19.2239	0		0	0	0	0	0	0
19.2415	0		0	0	0	0	0	0
19.2592	0		22.7034	1.15727	0	0	0	0
19.2768	0		23.2793	1.18663	1.5e-05	0	0	0
19.2945	0		0	0	1.5e-05	0	0	0
19.3121	0		0.81748	0	0	0	0	0
19.3298	0		0.83822	2.4e-05	0.50916	0	0	0
19.3474	0		0	2.5e-05	3.12617	0	7.03768	0
19.3651	0		0	0	6.341	3.49751	7.21622	0
19.3827	0		0	0	21.3901	3.58624	0	0
19.4003	0		0	0	18.0402	0	0	0
19.418	0		0	0	0	0	0	0
19.4356	0		0	0	0.08349	0	15.7093	0
19.4533	0		0	0	0.08561	0	16.1078	0
19.4709	0		0	0	0	0	0	0
19.4885	0		0	0	0	0	0	0
19.5062	0		0	0	0	0	6e-06	0
19.5238	0		0	0	0	0	6e-06	0
19.5415	0		0.09305	0	24.5784	0	0	0
19.5591	0		8.77245	0	25.2019	0	0	0
19.5768	0		8.90811	0	0	0	0	0
19.5944	0		0	0	0	0	0	0
19.612	0		0	0	0	0	0	0
19.6297	0		0	0	0	0	0	0
19.6473	0		0	0	0	0	0	0
19.665	0		0	0	0	0	0	0
19.6826	0		12.4024	0	0	0	0	0
19.7003	0		12.717	0	4.52752	0	0	0
19.7179	0		0	0	4.64238	0	0	0
19.7355	0		0	0	0	11.6488	0	0
19.7532	0		0	0	0	24.2643	0	0
19.7708	0		0	0	0	14.2442	0	0
19.7885	0		0	0	1.41896	1.66032	0	0
19.8061	0		0	0	1.45495	0	0	0
19.8238	0		0	0	0	0	0	0
19.8414	0		0	0	0	0	0	0
19.8602	0		0	0	0	0	0	0
19.8779	0		0	0	0	0	0	0
19.8955	0		0	0	0	0	0	0
19.9132	0		0	0	0	0.96893	0	0
19.9308	0		0	0	0	6.41623	6e-06	0
19.9485	0		0	0	0	5.28903	0	0
19.9661	0		0	0	0	0	0	0
19.9837	0		0	0	0	0	0	0
20.0014	0		0	0	0	0	0	0
20.019	0		0	0	0	0	0	0
20.0367	0		0	0	3.72682	0	0	0
20.0543	0		0	0	3.82136	0	0	0
20.0719	0		0	0	0	1.72783	0	0
20.0896	0		0	0	0	1.77166	0	0
20.1072	0		0	0	0	0	0	0
20.1249	0		0	0	0	0	0	0
20.1425	0		0	0	0	0	0	0
20.1602	0		0	0	0	0	0	0
20.1778	0		0	0	0	0	0	0
20.1955	0		0	0	0	0	0	0
20.2131	0		0	0	0	0	0	0
20.2307	0		0	0	0	0	0	0
20.2484	0		0	0	0	0	0	0
20.266	0		0	0	0	0	0	0
20.2837	0		0	0	0	0	0	17.0056
20.3013	0		0	0	0	0	0	17.437
20.3189	0		0	0	0	0	0	0
20.3366	0		0	0	0	0	0	0
20.3542	0		0	0	0	0	0	0
20.3719	0		0	0	0	0	0	0
20.3895	0		0	0	0	0	0	0
20.4072	0		0	0	0	0	0	0
20.4248	0		0	0	0	0.12208	0	0
20.4425	0		0	0	0	0.12517	0.06584	0
20.4601	0		0	0	4e-06	0	0.06751	0
20.4777	0		0	0	4e-06	0	1.6e-05	0
20.4954	0		0	0	0	0	1.6e-05	0
20.513	0		0	0	0	0	0	0
20.5307	0		0	0	0	0	0	0
20.5483	0		0	0	0	0	0	0
20.5659	0		0	0	0	33.5207	0	0
20.5836	0		0	0	0	34.3711	0	0
20.6012	0		0	0	0	0	0	0
20.6189	0		0	0	0	0	0	0
20.6365	0		8.77095	0	0	0	0	0.74557
20.6542	0		8.99346	0	0	0	0	0.76448
20.6718	0		0	0	0	0	0	0
20.6895	0		0	0	0	0	0	0
20.7071	0		0	0	0	0	0	0
20.7247	0		0	0	0	0	0	0
20.7424	0		0	0	0	0	2.2e-05	0
20.76	0		0	0.000192	0	0	2.3e-05	0
20.7777	0		0	0.000197	0	0	0	0
20.7953	0		0	0	0	0	0	1.06378
20.813	0		0	0	0	0	0	1.09077
20.8306	0		0	0.1303	0	0	10.0697	5.77059
20.8483	0		0	0.13361	0	0	10.3252	12.5004
20.8659	0		0	0	0	0	5.85196	6.75056
20.8835	0		0	0	0	0	6.00042	7.55942
20.9012	0		0	0	0	0	0	8.0039
20.9188	0		0	0	0	0	0	0
20.9365	0		0	0	0	0	0	0
20.9541	0		0	0	0	0	0	0
20.9718	0		0	0	0	0	0	0
20.9894	0		0	0	0	0.50032	0	0
21.0071	0		0	0	0	0.51301	0	0
21.0247	0		0	0	2.11222	0	0	0
21.0423	0		0	0	2.1658	0	0	0
21.06	0		0	0	0	0	0	0
21.0776	0		0	0	0	0	0	0
21.0953	0		0	0	0	0	0	0
21.1129	0		0	0	0	0	4.60672	0
21.1305	0		0	0	0	0	4.72359	0
21.1482	0		0	0	0	0	0	0
21.1658	0		0	0	0	0	0	0
21.1835	0		0	0	0	0	0	0
21.2011	0		0	0	0	3.37715	0	0
21.2188	0		0	0	4.62425	3.46283	0	0
21.2364	0		0	0	20.3814	0	0	0
21.254	0		0	0	16.0365	0	0	0
21.2717	0		4.48999	0	0	0	0	7.03327
21.2893	0		4.6039	0	0	2.80813	0	7.55114
21.307	0		0	0	0	2.87937	0	0.34806
21.3246	0		0	0	0	0	0	0
21.3422	0		0	0	0	0	4e-06	0
21.3599	0		0	0	0	0	4e-06	0
21.3775	0		0	0.92369	0	0	0	0
21.3952	0		0	0.94712	0	0	0	0
21.4128	0		4.51152	0	0	0	0	0
21.4305	0		4.62598	0	6.269	0	0	0
21.4481	0		0	0	6.42804	0	0	0
21.4657	0		0	0	0	0	3.30736	0
21.4834	0		0	0.80132	0	0	3.39127	0
21.501	0		0	0.82165	20.2685	0	0	0
21.5187	0		0	0	55.6379	0	0	0
21.5363	0		0	0	172.116	1.89282	3.17165	0
21.554	0		0	1.72811	152.111	5.75711	3.25211	0
21.5716	0		0	1.77195	63.0196	3.91308	41.3904	0
21.5892	0		0	0	47.2968	4.01398	42.4404	0
21.6069	0		0	0	84.5272	9.6469	30.2219	10.6637
21.6245	0		0	0	90.4654	5.67142	31.5889	10.9343
21.6422	0		0	0	73.0859	8.86266	0.61559	0
21.6598	0		0	9.37106	97.0682	25.5657	0	0
21.6775	0		0	9.6088	73.5392	16.8959	4e-06	0
21.6951	0		0	0	61.3045	0	1.24466	0
21.7128	0		0	19.8055	61.145	0	1.27624	0
21.7304	0		3.80817	34.3482	105.454	0	0	0
21.7481	0		3.90478	23.886	57.9567	0	0	0
21.7657	0		0	14.6843	11.8934	0	0	0
21.7833	0		0	5.07977	35.5418	1.14365	0	0
21.801	0		73.281	0	32.0194	1.17267	0	0
21.8186	0		75.1401	2.10449	8.2853	0	0	0
21.8363	0		0	2.15787	28.1807	0	0	2.96942
21.8539	0		0	1.54641	46.3326	1.88611	0	7.37763
21.8716	0		0	9.85596	17.8793	1.93396	0	4.44279
21.8892	0		0.23108	8.48012	0	1.43931	9e-06	0
21.9068	0		0.23694	0	73.1581	1.47582	1e-05	0
21.9245	0		0	0	174.298	0	0.000116	0
21.9421	0		0	0	127.671	0	0.000119	0
21.9597	0		0	11.0049	61.8441	0	0	0
21.9774	0		0	16.5123	51.438	0	6.7e-05	0
21.995	0		0	10.2075	65.789	0.00258	9.9e-05	0
22.0127	0		0	4.96965	178.121	0.00265	2.10161	0
22.0303	0		0	0	273.927	0	2.15492	0
22.048	0		0	0	216.462	0	30.3029	0
22.0656	0		0	0	79.009	0	31.0716	0
22.0833	0		61.3101	0	46.552	0	0	0
22.1009	0		82.171	0	130.711	0	0	0
22.1186	0		39.5446	0	119.785	0	0	0
22.1362	0		20.2503	1.07217	213.044	0	0	0
22.1538	0.46931		0	5.08886	236.078	0	15.5794	0
22.1715	0.48121		0.000888	4.09073	114.717	0	15.9746	0
22.1891	0		0.000911	0	151.473	0	0	0
22.2068	0		6.7579	22.6131	231.652	0	0	0
22.2244	0		8.00667	23.1868	148.476	0	0	0
22.242	0		1.10466	0	67.3977	0	0	0
22.2597	0		1.47652	0	117.07	41.7137	0	0
22.2773	0		1.51398	0	92.5234	42.7719	4.16291	0
22.295	0		6.60437	23.3873	98.7209	5.0313	4.26852	0
22.3126	0		10.2015	23.9806	130.687	51.0857	0	0
22.3303	0		3.51661	0	175.807	48.8892	0	0
22.3479	0		0	0	147.21	25.0951	0	0
22.3656	0		7.67229	0	107.092	23.842	0	0
22.3832	0		7.86693	0	172.457	16.2834	0	0
22.4008	0		7.96571	0	272.279	16.6965	0	0
22.4185	0		8.16785	0	225.713	3.38069	0	0
22.4361	0		0	0	183.359	18.5935	0	0
22.4538	0		0	2.60506	239.961	54.9776	0	0
22.4714	0		79.6694	15.6279	248.837	45.7062	0	0
22.4891	0		88.9901	13.2855	139.463	5.37097	0	0
22.5067	0		7.48477	0	115.592	0	0	0
22.5243	0		0	0	148.094	0	0	0.39802
22.542	0		0	0	116.173	0	0	0.40811
22.5596	0		7.75539	0	110.849	0	0	0
22.5773	0		7.95214	0	99.2949	0	0	0
22.5949	0		0	0	69.9641	0	0	0
22.6136	0		0.000203	30.0824	123.782	0	0	2.5236
22.6313	0		0.06796	30.8456	149.925	0	0	2.58858
22.6489	0		0	0.000375	70.649	0	0	0.000983
22.6666	0		0	0.000384	33.8769	0	0	0
22.6842	0		9.29537	0	98.3898	0	0	0
22.7018	0		9.53118	0	116.706	0	0	0
22.7195	0		0	0	33.7159	0	0	0
22.7371	0		16.5246	0	33.9349	0	0	0
22.7548	0		16.9438	0	119.791	0	0	0.27267
22.7724	0		0	0	107.727	0	0	0.27959
22.79	0		0	0	19.6613	0	1.56312	0
22.8077	0		0	0	3e-06	0	1.60277	0
22.8253	0		0	3.84062	7.08995	0	0	0
22.843	0		0	3.93805	52.8973	0	0	0
22.8606	0		0	0	83.6528	0	0	0.94505
22.8783	0		2.41486	0	110.769	0	0	0.96902
22.8959	0		3.13301	3.77431	80.0919	0	0	0
22.9136	0		10.0442	3.87006	15.6813	0	0	0
22.9312	0		24.0971	0	120.764	0	0	0
22.9488	0		14.8563	0	158.197	0	0	0
22.9665	0		8.03853	0	81.0221	0	0	0
22.9841	0		12.4982	0.97721	71.1511	0	3.90042	0
23.0018	0		4.36369	1.002	80.2194	0	3.99937	0
23.0194	0		0	0	72.5458	0	0	0
23.0371	0		0	0	74.4679	0	0	0
23.0547	0		0	0	79.7077	0	11.0023	0
23.0723	0		0	0	62.6157	0	11.2814	0
23.09	0		13.8313	0	23.1509	0	0	0
23.1076	0		38.8356	0	1.34466	0	0	0
23.1253	0		25.2788	0	0	0	0	0
23.1429	0		0.000579	0	0	0	0	0
23.1606	0		0.000594	0	0.0475	0	0	0
23.1782	0		0	0	23.8954	0	0	0
23.1959	0		0	0	43.9262	0	0	0
23.2135	0		0	0	21.9703	0	0	0
23.2311	0		0	0	6.25833	0	0	0
23.2488	0		0	0	10.1029	0	0	0
23.2664	0		0	0	43.368	0	0	0
23.2841	0		0	0	35.1395	0	0	0
23.3017	0		0	0	1.32608	0	0	0
23.3193	0		0	0	0	0	0	0
23.337	0		0	0	25.9923	0	0	0
23.3546	0		0	0	26.6517	0	0	0
23.3723	0		0	0	65.0357	0	0	0
23.3899	0		0	0	87.6916	0	8.34252	0
23.4076	0		0	0	26.031	0	8.55416	0
23.4252	0		0	0	11.6795	0	0	0
23.4428	0		0	0	7.25295	0	0	0
23.4605	10.2749		0	0	4.5749	0	0	0
23.4781	10.5356		0	0	18.6858	0	0	0
23.4958	0		0	0	16.1276	0	0	0
23.5134	0		6e-05	0	2.13931	0	0	0
23.5311	0		6.2e-05	0	9e-06	0	0	0
23.5487	0		5.05045	0	5.72777	0	0	0
23.5663	0		5.17858	0	5.87308	0	0	0
23.584	0		0	0	9.06651	0	0	0
23.6016	0		0	0	16.8753	0	0	0
23.6193	0		0	0	7.77105	0	0	0
23.6369	0		0	1.03278	0	0	0	0
23.6546	0		17.0985	1.05898	0	0	0	0
23.6722	0		17.5325	0	0	0	0	0
23.6898	0		0	0	0	0	2.92764	0
23.7075	0		0	0	0	0	3.00191	0
23.7251	0		0	0	0.11224	0	0	0
23.7428	0		0	0	1.72846	0	0	0
23.7604	0		0	13.1244	25.0908	0	0	0
23.7781	0		0	13.4574	24.8832	0	0	0
23.7957	0		0	0	0.87381	0	0	0
23.8134	0		0	0	0	0	0	0.000323
23.831	0		0	0	11.2571	0	0	0.000331
23.8486	0		0	0	11.5427	0	0	0
23.8663	0		0	0	2.37077	0	0	0
23.8839	0		0	0	2.43091	0	0	0
23.9016	0		0	0	0	0.06765	0	0
23.9192	0		0	0.41168	0	0.06936	0	0
23.9368	0		0	0.42213	0	0	0	0
23.9545	0		0	0	0	0	0	0
23.9721	0		0	0	0	0	0	0
23.9898	0		0	0.000351	0	0	0	0
24.0074	0		0	0.00036	0	5e-06	0	0
24.0251	0		0	0	0	5e-06	0	0
24.0427	0		0	0	0	0	0	0
24.0603	0		0	0	0	0	0	0
24.078	0		0	0	0	0	0	0
24.0956	0		0	0	0	0	0	0
24.1133	0		0	0	0	0	0	0
24.1309	0		0	0	0	0	0	0
24.1486	0		0	0	0	0	0	0
24.1662	0		0	0	0	0	0	0
24.1839	0		0.000307	0	0	9.3e-05	0	0
24.2015	0		0.000315	0	0	9.5e-05	0	0
24.2192	0		0	0	0	0	0	0
24.2368	0		0	0	0	0.000188	0	0
24.2544	0		0	0	0	4.48642	0	0
24.2721	0		0	0	0	4.60004	0	0
24.2897	0		0	0	0	0	0	0
24.3083	0		0	0	0	0	0	0
24.326	0		0	0	0	0	0	0
24.3436	0		0	0	0	0	0	0
24.3613	0		0	0	0	0	0	0
24.3789	0		1.16656	0	0	0	0	0
24.3965	0		1.19615	0	12.2955	0	0	0
24.4142	0		0	0	28.0176	0	0	0
24.4318	0		54.6614	0	21.6919	0	0	0
24.4495	0		56.0481	0	9.48369	0	0	0
24.4671	0		0	0	25.7192	0	0	0
24.4848	0		0	0	84.3076	0	0	0
24.5024	0		0	0	99.6863	0	0	0
24.5201	0		0	0	57.6698	0	0	0
24.5377	0		0	0	142.208	0	0	0
24.5554	0		0	0	149.722	0	0	0
24.573	0		0	0	60.8024	55.8145	0	0
24.5906	0		0	0	76.8312	70.4064	0.59133	0
24.6083	0		0	0	55.9224	16.1287	0.60634	0
24.6259	0		1.29942	0	30.9792	9.8179	0	0
24.6436	0		66.2278	0	8.73646	7.31401	0	0
24.6612	0		66.5417	0	69.57	0	0	5.8074
24.6789	0		0	0	66.0932	0	0	5.95473
24.6965	0		0	0	0	0	0	0
24.7141	0		0	0	9.09862	0	0	0
24.7318	0		0	0.69783	9.32944	0	0	0
24.7494	0		0	0.71553	0	0	0	0
24.7671	0		0	0	0	0	0	0
24.7847	0		0	0	0	4.08918	0	0
24.8023	0		0	0	75.7911	4.19292	0	0
24.82	0		0	0	83.2049	0	0	0
24.8376	0		0	0	5.63031	0	0	0
24.8553	0		0	0	12.63	0	0	0
24.8729	0		0	0	12.9504	0	0	0
24.8906	0		0	0	0	0	0	0
24.9082	0		0	0	0	0	0	0
24.9258	0		0	0	0	0	0	0
24.9435	0		0	0	0	0	0	0
24.9611	0		0	0	0	0	0	0
24.9788	0.47314		0	0	0	0	0	0
24.9964	0.48514		0	0	0.18249	0	0	0

## Sheet: Fig 4E
	UDP-glucose	UDP-galactose	UDP-glucuronic_acid	UDP-xylose	UDP-glcNAC/UDPG-galNAC	GDP-fucose	CMP-SA	GDP-mannose	Total
sample	ion intensity
ctrl 1	455726	114260	511911	10754.3	6.88719e+06	94523.8	99312	39345	8.21302e+06
ctrl 2	742696	170142	935582	14644.7	1.16278e+07	138667	154723	58957	1.38432e+07
ctrl 3	259608	59568.8	225511	8618.87	3.97761e+06	62532	70275	28205	4.69192e+06
ctrl 4	301667	69355	287459	11057.3	5.12539e+06	70354.7	81128	32587	5.979e+06
ctrl 5	159761	40951.8	147047	5083.02	2.18829e+06	50661.7	42187	21697	2.65568e+06
SLC35D3OE 1	406706	93206.1	617040	8974.73	7.3144e+06	127215	121109	56382	8.74504e+06
SLC35D3OE 2	455494	102422	517870	12723.7	7.39244e+06	125475	128462	57715	8.7926e+06
SLC35D3OE 3	516086	115922	550363	11686.2	8.34701e+06	137763	135852	66416	9.8811e+06
	normalization
	UDP-glucose	UDP-galactose	UDP-glucuronic_acid	UDP-xylose	UDP-glcNAC/UDPG-galNAC	GDP-fucose	CMP-SA	GDP-mannose
ctrl 1	1.00858	1.05524	1.10738	0.821712	0.996511	0.875913	0.893045	0.835142
ctrl 2	0.975173	0.932251	1.20074	0.663868	0.998169	0.762358	0.825452	0.742457
ctrl 3	1.00571	0.963003	0.85393	1.15276	1.00743	1.01432	1.10618	1.04797
ctrl 4	0.91708	0.879852	0.854189	1.16054	1.01869	0.895546	1.00211	0.950145
ctrl 5	1.09346	1.16965	0.983753	1.20112	0.979203	1.45187	1.17321	1.42429
SLC35D3OE 1	0.845332	0.808431	1.2536	0.64402	0.993941	1.10714	1.0228	1.12396
SLC35D3OE 2	0.941616	0.883557	1.04643	0.908106	0.999111	1.08608	1.07903	1.14431
SLC35D3OE 3	0.949346	0.889861	0.989579	0.74218	1.00385	1.06109	1.0154	1.17177

## Sheet: Fig 4F
	UDP-glc & UDP-gal				CMP-SA				UDP-glcNAc & UDP-galNAc
	Ctrl	SLC35A2OE			Ctrl	SLC35A2OE			Ctrl	SLC35A2OE
Retention time (min)	Ion intensity			Retention time (min)	Ion intensity			Retention time (min)	Ion intensity
5.30358	0.000539	0.000574931		4.62016	0.08901	0.04095		5.8144	0	0
5.32025	0.000539	0.000574931		4.63683	0.08901	0.04095		5.83107	0	0
5.33692	0.000475	0.00103		4.6535	0.04867	0.07462		5.84774	8.5e-05	0
5.35359	0.000386	0.00218		4.67017	0.00245	0.08043		5.86441	8.7e-05	0
5.37026	0.000598	0.00182		4.68684	0.02663	0.05127		5.88108	0	0
5.38693	0.00106	0.00132		4.70351	0.06219	0.0959		5.89775	0	0
5.4036	0.000881	0.00219		4.72018	0.05788	0.08287		5.91442	0	0
5.42027	0.000499	0.00122		4.73685	0.06641	0.06409		5.93109	0	0
5.43693	0.000571	0.000877706		4.75351	0.09745	0.11084		5.94776	0	0
5.4536	0.000747	0.00131		4.78017	0.07496	0.10071		5.96444	0	0
5.47028	0.00103	0.00121		4.79684	0.00278	0.00109		5.98111	0	0
5.48695	0.00085	0.000915127		4.81351	0	0		5.99778	0	0
5.50361	0.000475	0.00169		4.83018	0.00114	0.000338495		6.01445	0	0
5.52028	0.000667	0.00173		4.84685	0.000649	0.000695701		6.03112	0	0
5.53695	0.00119	0.000876005		4.86352	5.6e-05	0.000108863		6.04779	0	0
5.55363	0.00127	0.000969559		4.88019	0.000456	0.00072972		6.06446	0	0
5.5703	0.00118	0.000275559		4.89686	0.000334	0.000437152		6.08113	0	0
5.58697	0.00103	0.00131		4.91353	0.000757	0.000185407		6.0978	0	0
5.60363	0.00082	0.00217		4.93019	0.000377	0.000282363		6.11447	0	0
5.6203	0.00143	0.000927034		4.94686	0.000567	0.000442255		6.13114	0	0
5.63698	0.00111	0.00157		4.96353	0.000574	0.000702505		6.14781	0	0
5.65365	0.00054	0.0018		4.9802	9.1e-05	0.000957652		6.16448	0	0
5.67032	0.000579	0.000585137		4.99687	8.1e-05	0.000862397		6.18115	0	0
5.68699	0.000346	0.00113		5.01354	0.000241	0.000324887		6.19782	0	0
5.70365	0.000193	0.00127		5.03021	0.000588	0.000142882		6.21449	0	0
5.72033	0.000576	0.00147		5.04688	0.000594	0.00107		6.23116	0	0
5.73699	0.00044	0.00151		5.06354	9.9e-05	0.000981465		6.24784	0	0
5.75366	0.000402	0.000857294		5.08021	0.000528	0.000137779		6.26451	0	0
5.77033	0.000603	0.000656578		5.09688	0.000429	0.000940642		6.28118	0	0
5.787	0.000621	0.000770544		5.11355	0.000176	0.00277		6.29785	0	0
5.80726	0.000539	0.000852191		5.13022	0.000178	0.000784152		6.31452	0	0
5.82393	0.000219	0.000452461		5.14689	0.000242	0.000911725		6.33119	0	0
5.8406	0	0		5.16356	0.000209	0.00141		6.34786	0	0
5.85726	0.00105	0.00148		5.18023	0.000436	0.000535809		6.36453	0	0
5.87394	0.000141	0.000341897		5.19689	0.000436	0.000518799		6.3812	0	0
5.89061	0.00106	0.00108		5.21356	0.000129	0.000547716		6.39787	0	0
5.90728	0.000719	0.000348701		5.23023	0.000108	0.00114		6.41454	0	0
5.92395	0.000904	0.000464368		5.2469	0.000196	0.00108		6.43121	0	0
5.94062	0.000326	0.000923632		5.26357	0.000417	0.00111		6.44788	0	0
5.95729	0.000342	0.00179		5.28024	0.000192	0.00181		6.46455	0	0
5.97396	0.000568	0.00168		5.29691	0.000987	0.000518799		6.48122	0	0
5.99063	0.000455	0.000513696		5.31608	0.000847	0.00026025		6.49789	0	0
6.0073	0.000395	0.000398029		5.33275	0.000249	0.000916828		6.51456	0	0
6.02397	0.000309	0.0012		5.34942	0.000896	0.00131		6.53123	0	0
6.04064	0.00041	0.00153		5.36608	0.000906	0.00111		6.5479	0	0
6.05731	0.000552	0.000639568		5.38276	0.000595	0.001		6.56457	0	0
6.07398	0.000547	0.00142		5.39942	0.000787	0.00203		6.58124	0	0
6.09065	0.000597	0.0018		5.41609	0.000675	0.00297		6.59791	0	0
6.10732	0.00117	0		5.43276	0.000783	0.00216		6.61458	0	0
6.12399	0.00126	0.000474573		5.44943	0.00102	0.00113		6.63125	0	0
6.14067	0.000874	0.00151		5.46611	0.0012	0.000818171		6.64792	0	0
6.15734	0.00103	0.000670186		5.48278	0.00125	0.000828377		6.66459	0	0
6.17401	0.00103	0.000881108		5.49944	0.000831	0.000978064		6.68126	0	0
6.19068	0.00101	0.000792657		5.51611	0.000806	0.00111		6.69793	0	0
6.20735	0.000568	0.000124172		5.53278	0.000964	0.000716113		6.7146	0	0
6.22402	0.0011	0.00107		5.54946	0.000678	0.000692299		6.73127	0	0
6.24069	0.00112	0.00111		5.56613	0.00103	0.000794358		6.74794	0	0
6.25736	0	7.31421e-05		5.58279	0.00118	0.000921931		6.76461	0	0
6.27403	0.000887	0.000216024		5.59946	0.000454	0.00194		6.78128	0	0
6.2907	0.00125	0.000819872		5.61613	0.000737	0.00224		6.79796	0	0
6.30737	0.000566	0.00144		5.63281	0.00105	0.00167		6.81463	0	0
6.32404	0.000578	0.00188		5.64948	0.000646	0.00142		6.83129	0	0
6.34071	0.000617	0.00134		5.66614	0.00113	0.00165		6.84796	0	0
6.35738	0.000678	0.000634466		5.68281	0.00121	0.00146		6.86463	0	0
6.37405	0.0005	0.000654877		5.69948	0.000658	0.00118		6.88131	0	0
6.39073	0.000163	0.000675289		5.71616	0.00021	0.0011		6.89798	0	0
6.4074	0.000366	0.000671887		5.73282	0.000779	0.00174		6.91465	0	0
6.42407	0.000554	0.00188		5.74949	0.000689	0.00222		6.93132	0	0
6.44074	0.000456	0.0024		5.76616	0.000709	0.000847088		6.94798	0	0
6.45741	0.000653	0.000806265		5.78283	0.000763	0.00136		6.96466	0	0
6.47408	0.000527	0.000942343		5.79951	0.000662	0.00206		6.98133	0	0
6.49075	6.9e-05	0.00104		5.81796	0.000855	0.00133		6.998	0	0
6.50742	9.1e-05	0.00114		5.83463	0.000361	0.000522201		7.01467	0	0
6.52409	0.00033	0.00181		5.8513	0	0		7.03134	0	0
6.54076	0.000315	0.00205		5.86797	0.00234	0.00461		7.04801	0	0
6.55743	0.000502	0.00184		5.88464	3.2e-05	0.000644671		7.06468	0	0
6.5741	0.00113	0.00107		5.90131	0.00284	0.00273		7.08135	0	0
6.59077	0.00107	0.00136		5.91798	0.00163	0.00139		7.09802	0	0
6.60744	0.000331	0.00143		5.93465	0.000578	0.00151		7.11469	0	0
6.62411	0.000598	0.00198		5.95132	0.00117	0.00111		7.13136	0	0
6.64078	0.000645	0.00157		5.968	0.000968	0.00373		7.14803	0	0
6.65745	0.000174	0.000831779		5.98467	0.000969	0.00468		7.1647	0	0
6.67412	0.000372	0.000758637		6.00134	0.000836	0.00183		7.18137	0	0
6.69079	0.000749	0.00026025		6.01801	0.000464	0.00237		7.19804	0	0
6.70746	0.00116	0.000216024		6.03468	0.000473	0.0025		7.21471	0	0
6.72414	0.000692	0.00053751		6.05135	0.000462	0.00065998		7.23138	0	0
6.74081	0.000877	0.00168		6.06802	0.00158	0.000750132		7.24805	0	0
6.75748	0.00116	0.00162		6.08469	0.00141	0.00131		7.26472	0	0
6.77415	0.00045	0.0001735		6.10136	0.000189	0.00161		7.28139	0	0
6.79082	0.000515	0.000268755		6.11803	0.00127	0.00202		7.29806	0	0
6.80749	0.000542	0.000644671		6.1347	0.00209	0.00284		7.31473	0	0
6.82416	0.000936	0.00144		6.15137	0.00109	0.00267		7.3314	0	0
6.84083	0.000863	0.00192		6.16804	0.00103	0.00207		7.34807	0	0
6.8575	0.000214	0.00126		6.18471	0.00189	0.00184		7.36474	0	0
6.87417	0.000548	0.000588539		6.20138	0.00169	0.00268		7.38141	0	0
6.89084	0.000627	0.000806265		6.21806	0.00145	0.00416		7.39808	0	0
6.90751	0.000355	0.00152		6.23473	0.00134	0.00296		7.41475	0	0
6.92418	0.00103	0.00137		6.2514	0.00173	0.00129		7.43142	0	0
6.94085	0.00113	0.0018		6.26807	0.00172	0.00226		7.44809	0	0
6.95752	0.000272	0.000923632		6.28474	0.000563	0.00186		7.46476	0	0
6.97419	0.000659	0.000326588		6.30141	0.000903	0.000671887		7.48143	0	0
6.99086	0.000878	0.00107		6.31808	0.000948	0.0012		7.4981	0	0
7.00753	0.00047	0.000525603		6.33475	0.000649	0.00307		7.51478	0	0.000263823
7.0242	0.000942	0.000957652		6.35142	0.00121	0.00271		7.53145	0	0.000270419
7.04087	0.000789	0.00136		6.36809	0.000638	0.00111		7.54812	0	0
7.05754	0.000213	0.000682093		6.38476	0.000545	0.00118		7.56479	0.000179	0
7.07421	0.0004	0.000532407		6.40143	0.00083	0.00118		7.58146	0.000184	0
7.09088	0.00127	0.00046947		6.4181	0.000567	0.0014		7.59813	0	0
7.10756	0.00119	0.000964456		6.43477	0.000884	0.000617456		7.6148	0	0
7.12423	0.000199	0.00097126		6.45144	0.000746	0.000454162		7.63147	0	0
7.1409	0.00101	0.000415039		6.46811	0.000756	0.00204		7.64814	0	0
7.15757	0.00103	0.000605549		6.48479	0.00237	0.0038		7.66481	0	0
7.17424	4e-05	0.000493284		6.50146	0.00204	0.00229		7.68148	0	0
7.19091	0.00021	0.00104		6.51812	0.000401	0.000396328		7.69815	0	0
7.20758	0.000241	0.00144		6.53479	0.00104	0.00191		7.71482	0	0
7.22425	0.000215	0.00088451		6.55147	0.00148	0.00199		7.73149	0	0
7.24092	0.000441	0.000690598		6.56814	0.00137	0.00301		7.74816	0	0
7.25759	0.000604	0.00136		6.58481	0.00104	0.00369		7.76483	0	0
7.27426	0.000427	0.00151		6.60147	0.00177	0.00145		7.7815	0	0
7.29093	0.000433	0.000406534		6.61814	0.00129	0.000906622		7.79817	0	0
7.3076	0.000722	0.000665083		6.63482	0.00084	0.00137		7.81484	0	0
7.32427	0.00077	0.000489882		6.65148	0.00186	0.00251		7.83151	0	0
7.34094	0.00122	0.00102		6.66816	0.000588	0.00235		7.84818	0	0
7.35761	0.000815	0.00181		6.68482	0.00163	0.00205		7.86485	0	0
7.37428	0	0.00159		6.70149	0.00259	0.00303		7.88153	0	0
7.39095	0.000231	0.00218		6.71817	0.00174	0.00261		7.8982	0	0
7.40762	0.000586	0.000932137		6.73484	0.00144	0.00245		7.91487	0	0
7.42429	0.00047	4.25245e-05		6.75151	0.00166	0.00285		7.93153	0	0
7.44096	0.000632	0.000505191		6.76818	0.00258	0.00324		7.9482	0	0
7.45763	0.000227	0.000384421		6.78484	0.00201	0.00331		7.96488	0	0
7.4743	0.000175	0.000178603		6.80152	0.00189	0.00357		7.98155	0	0
7.49097	0.000131	0.000360608		6.81819	0.00222	0.00272		7.99822	0	0
7.50764	0.000145	0.000617456		6.83486	0.00146	0.0012		8.01489	0	0
7.52431	0.00045	0.000722917		6.85153	0.00108	0.00165		8.03156	0	0
7.54098	0.00138	0.00149		6.8682	0.00164	0.00104		8.04823	0	0
7.55766	0.00103	0.00149		6.88487	0.00162	0.00101		8.0649	0	0
7.57433	1.7e-05	0.000396328		6.90154	0.0014	0.00214		8.08157	0	0
7.591	0.000305	0.000773946		6.91821	0.00215	0.00178		8.09824	0	0
7.60767	0.000351	0.000549417		6.93488	0.00207	0.00155		8.11491	0	0
7.62434	0.000357	0.000263652		6.95155	0.00139	0.00103		8.13158	0	0
7.64101	0.000563	0.00108		6.96822	0.00113	0.00183		8.1493	0	0
7.65768	0.000424	0.00155		6.98489	0.000915	0.00287		8.16598	0	0
7.67435	0.000199	0.00137		7.00156	0.000567	0.00217		8.18265	0	0
7.69102	0.000104	0.000551118		7.01823	0.00107	0.0019		8.19932	0	0
7.70769	0.000479	0.000525603		7.0349	0.00165	0.00176		8.216	0	0
7.72436	0.000531	0.000289167		7.05157	0.00101	0.00224		8.23267	0	0
7.74103	0.000663	0.0012		7.06824	0.00133	0.00303		8.24934	0	0
7.7577	0.000857	0.00178		7.08491	0.00174	0.00245		8.26601	0	0
7.77437	0.000441	0.00098997		7.10158	0.00174	0.00139		8.28268	0	0
7.79104	0.000536	0.00165		7.11825	0.0014	0.00165		8.29936	0	0
7.80771	0.000786	0.00119		7.13492	0.000352	0.00315		8.31603	0	0
7.82439	0.000526	0.00055622		7.15159	0.000693	0.00356		8.33271	0	0
7.84106	0.000533	0.00163		7.16826	0.00144	0.00231		8.34938	0	0
7.85773	0.0006	0.00161		7.18493	0.00159	0.00205		8.36605	0	0
7.87439	0.000908	0.000716113		7.2016	0.00109	0.00241		8.38272	0	0
7.89107	0.0013	0.00116		7.21827	0.000782	0.00255		8.3994	0	0
7.90774	0.000894	0.00137		7.23494	0.00153	0.00382		8.41607	0	0
7.92441	0.000602	0.000995073		7.25161	0.00113	0.00363		8.43274	0	0
7.94108	0.000378	0.00101		7.26828	0.000681	0.00305		8.44941	0	0
7.95775	0.000342	0.000324887		7.28495	0.00138	0.00369		8.46609	0	0
7.97442	0.00052	0.000539211		7.30162	0.00132	0.00291		8.48276	0	0
7.99109	0.000389	0.00153		7.31829	0.000968	0.00212		8.49943	0	0
8.00776	0.000287	0.0013		7.33496	0.000846	0.00105		8.51611	0	0
8.02443	0.000348	0.000972961		7.35163	0.00141	0.00128		8.53278	0	0
8.0411	0.000488	0.000792657		7.3683	0.00124	0.00239		8.54945	0	0
8.05777	0.000252	0.000467769		7.38497	0.000526	0.00145		8.56612	0	0
8.07444	0.000787	0.000724617		7.40164	0.00107	0.00111		8.5828	0	0
8.09111	0.00133	0.00122		7.41831	0.00172	0.00111		8.59947	0	0
8.10778	0.000431	0.000874304		7.43498	0.00154	0.000993372		8.61614	0	0
8.12445	0.000586	0.000636167		7.45165	0.00127	0.00266		8.63282	0	0
8.1405	0.000762	0.000683794		7.46833	0.00131	0.00374		8.64949	0	0
8.15717	7.9e-05	0.000267054		7.485	0.00123	0.00234		8.66616	0	0
8.17384	5.4e-05	3.23186e-05		7.50167	0.0013	0.00181		8.68283	0	0
8.19051	9.9e-05	6.63382e-05		7.51834	0.00115	0.00232		8.6995	0	0
8.20718	0.00011	0.000105461		7.53501	0.00111	0.00316		8.71618	0	0
8.22386	3.6e-05	0.000171799		7.55168	0.00163	0.00392		8.73285	0	0
8.24053	3.3e-05	0.000124172		7.56835	0.00161	0.00275		8.74952	0	0
8.2572	0.00012	7.48431e-05		7.58502	0.00113	0.00224		8.7662	0	0
8.27388	0.000297	0.000187108		7.60169	0.00106	0.00408		8.78287	0	0
8.29055	0.000251	0.000234735		7.61836	0.000594	0.00424		8.79954	0	0
8.30722	4.8e-05	8.5049e-05		7.63503	0.000785	0.00186		8.81695	0	0
8.3239	0.000199	9.35539e-05		7.6517	0.0022	0.00254		8.83362	0	0
8.34057	0.000222	0.000159892		7.66837	0.00231	0.00291		8.85029	0	0
8.35724	0	0.000164995		7.68504	0.00248	0.000964456		8.86696	0	0
8.37391	8.7e-05	0.000251745		7.70171	0.00202	0.00149		8.88364	0	0
8.39059	0.000131	0.000421843		7.71838	0.00183	0.00216		8.90031	0	0
8.40726	0.000233	0.000586838		7.73505	0.00248	0.00205		8.91698	0	0
8.42393	0.000326	0.000241539		7.75172	0.0011	0.00208		8.93365	0	0
8.4406	0.000111	3.91225e-05		7.76839	0.00118	0.0011		8.95033	0	0
8.45728	8.7e-05	0.000598745		7.78506	0.00233	0.00144		8.967	0	0
8.47395	0.000158	0.000525603		7.80174	0.00144	0.00234		8.98367	0	0
8.49062	4.9e-05	0		7.81841	0.00108	0.00192		9.00035	0	0
8.5073	0.000168	0.000102059		7.83508	0.00199	0.00195		9.01702	0	0
8.52397	0.00021	9.35539e-05		7.85175	0.000987	0.00114		9.03369	0	0
8.54064	0.000139	0.000112265		7.86842	0.000356	0.00139		9.05036	0	0
8.55731	0.000247	0.00031298		7.88509	0.00108	0.00236		9.06703	0	0
8.57399	0.000296	0.000113966		7.90176	0.00193	0.00271		9.08371	0	0
8.59066	0.000221	0		7.91843	0.00164	0.00258		9.10038	0	0
8.60733	0.000114	0.000146284		7.9351	0.00066	0.00226		9.11705	0	0
8.624	8.7e-05	0.000238137		7.95176	0.000976	0.00329		9.13372	0	0
8.64068	0.000219	0.000159892		7.96844	0.00112	0.00182		9.1504	0	0
8.65735	0.000297	0.000285765		7.98511	0.00185	0.00095425		9.16707	0	0
8.67402	0.000268	0.00036401		8.00178	0.00135	0.00205		9.18374	0	0
8.6907	0.000203	0.000175201		8.01845	0.00102	0.00219		9.20041	0	0
8.70737	9.3e-05	0.000233034		8.03512	0.00179	0.00269		9.21708	0	0
8.72404	0.000168	0.000353804		8.05179	0.000707	0.00276		9.23375	0	0
8.74071	0.000182	0.000154789		8.06846	0.00113	0.00241		9.25043	0	0
8.75739	7.2e-05	0.00019051		8.08513	0.00178	0.00362		9.2671	0	0
8.77406	5.8e-05	0.000275559		8.1018	0.00159	0.00326		9.28377	2.47889	0
8.79073	0.000126	0.000146284		8.11847	0.00204	0.00171		9.30044	2.54178	0
8.80697	0.000204	0		8.13514	0.00109	0.00225		9.31712	0	0
8.82364	0	0		8.15223	0.000694	0.00205		9.33379	0	0
8.84031	0	1.87108e-05		8.16891	0.000663	0.00137		9.35046	0	0
8.85698	0	0		8.18558	5.5e-05	0.000437152		9.36713	0	0
8.87365	1.7e-05	0		8.20225	0.000317	0.000314681		9.3838	0	0
8.89033	0	0		8.21893	0.000379	0.000563024		9.40048	0	0
8.907	1e-05	0		8.2356	0.000623	0.000292569		9.41715	0	0
8.92367	0	1.02059e-05		8.25227	0.000818	0.000665083		9.43382	0	0
8.94034	2e-06	7.48431e-05		8.26894	0.000394	0.000852191		9.45049	0	0
8.95701	1.1e-05	5.44314e-05		8.28562	0.00017	0.000714412		9.46717	0	0
8.97369	1.4e-05	0		8.30229	3.4e-05	0.000413338		9.48384	0	0
8.99036	0	0		8.31897	0.000332	0.000858995		9.50051	0	0
9.00703	0	0		8.33564	0.000581	0.000882809		9.51718	0	0
9.0237	1.6e-05	6.12353e-05		8.35231	0.000457	0.000192211		9.53385	0.000211	0
9.04038	1.7e-05	0		8.36898	0.0007	0.000246642		9.55053	0.000216	0
9.05705	0	0		8.38566	0.000659	0.000467769		9.5672	0	0
9.07372	0	0		8.40233	0.000392	0.000787554		9.58387	0	0
9.09039	6.5e-05	0		8.419	0.000615	0.000678691		9.60054	0	0
9.10706	4.1e-05	8.5049e-06		8.43567	0.000562	0.000352103		9.61721	0	0
9.12374	2.8e-05	8.5049e-06		8.45235	0.000356	0.000627662		9.63389	0	0
9.14041	4e-06	0		8.46902	0.000222	0.000544314		9.65056	0	7.06957
9.15708	2.3e-05	0		8.48569	0.000213	0.000147985		9.66723	0	68.023
9.17375	2.1e-05	0		8.50236	0.000296	0.000127574		9.68416	0	129.907
9.19043	7e-06	0		8.51904	0.000201	0.000505191		9.70083	0	190.934
9.2071	2.2e-05	0		8.53571	0.000628	0.000636167		9.71751	0	609.411
9.22377	2.2e-05	1.19069e-05		8.55238	0.000632	0.000530706		9.73418	0	1442.45
9.24044	2e-06	0		8.56906	0.00048	0.000542613		9.75085	0	3146.69
9.25712	7.3e-05	0		8.58573	0.000646	0.000760338		9.76752	0	6369.44
9.27379	5e-06	0		8.6024	0.000256	0.000995073		9.78419	2.92525	10511
9.29046	4.8e-05	0		8.61907	0.000128	0.000801162		9.80087	30.7287	16545.8
9.30713	0	0		8.63575	7.8e-05	0.000974662		9.81754	103.466	24178.3
9.32381	9.3e-05	0		8.65242	0.000106	0.000964456		9.83421	305.497	30090.8
9.34048	0.000122	4.93284e-05		8.66909	0.000285	0.0005205		9.85088	788.491	34058.1
9.35715	0	0		8.68576	0.90768	0.000889613		9.86756	1602.38	37728.8
9.37382	0	0		8.70244	3.10523	0.00101		9.88423	3257.63	38356.7
9.39049	0	0		8.71911	52.0062	3.09024		9.9009	6896.44	35193.6
9.40717	0	3.23186e-05		8.73578	202.824	34.1816		9.91757	11499.8	30031
9.42384	0	3.40196e-05		8.75246	374.207	179.549		9.93424	17136.4	22723.5
9.44051	2.30298	0		8.76913	575.374	373.486		9.95092	22348.3	18196.4
9.45718	25.7223	4.07517		8.7858	1067.22	645.287		9.96759	27123.3	15514.1
9.47386	50.6113	66.6155		8.80248	1724.66	1003.79		9.98426	31654.3	10180.5
9.49053	72.8448	165.911		8.81944	2328.49	1492.96		10.0009	35003.1	6764.73
9.5072	143.854	189.465		8.83611	2756.45	1848.44		10.0176	38364.9	5038.52
9.52387	206.541	242.672		8.85278	3086.28	2227.97		10.0343	37033.4	2731.91
9.54054	254.266	371.061		8.86946	3347	2686.08		10.051	32528.7	1739.39
9.55722	260.616	419.368		8.88613	2924.74	2531.2		10.0676	26970.7	1193.22
9.57389	272.908	556.417		8.9028	2593.92	2169.03		10.0843	20578	739.205
9.59056	250.799	705.848		8.91947	2173.84	1989.03		10.101	15821.3	529.214
9.60723	186.884	708.04		8.93615	1566.34	1921.38		10.1176	11886.8	283.262
9.6239	238.48	505.154		8.95282	1330.36	1506.85		10.1343	8746.58	288.703
9.64058	202.44	389.477		8.96949	980.079	1093.03		10.151	6059.24	285.326
9.65725	123.834	345.306		8.98617	630.627	841.852		10.1677	3866.05	197.973
9.67392	114.237	196.465		9.00284	399.734	666.261		10.1843	2528.6	109.845
9.69059	75.805	142.299		9.01951	239.809	423.152		10.201	1846.15	36.3398
9.70726	77.3305	120.844		9.03618	183.538	212.808		10.2177	1148.67	50.7644
9.72394	104.272	266.483		9.05286	91.549	77.9546		10.2343	668.841	55.4139
9.74061	173.019	344.224		9.06953	24.5725	82.6371		10.251	403.332	79.1051
9.75728	276.628	228.142		9.0862	42.4534	75.4059		10.2677	206.559	70.9844
9.77395	387.664	430.147		9.10287	37.1063	31.2633		10.2844	198.915	78.1537
9.79063	611.967	815.193		9.11954	32.2637	10.2198		10.301	274.49	75.7642
9.8073	893.051	1013.34		9.13622	22.1124	9.78325		10.3177	227.18	53.1635
9.82397	845.68	1198.71		9.15289	0.9349	0		10.3344	95.9554	70.9509
9.84065	905.416	1422.11		9.16956	1.5e-05	0		10.3511	76.5137	69.1581
9.85732	982.926	1572.04		9.18623	1.8e-05	3.40196e-05		10.3677	50.1791	57.3215
9.87399	875.351	1593.32		9.2029	0	3.40196e-05		10.3844	67.1617	77.6465
9.89066	815.383	1647.9		9.21957	0	0		10.4011	113.61	89.5374
9.90733	774.251	1482.03		9.23624	0	0.000125873		10.4177	171.632	49.6308
9.92401	503.926	976.281		9.25292	1.2e-05	5.95343e-05		10.4344	133.086	45.085
9.94068	305.563	843.122		9.26959	1.2e-05	0.000105461		10.4511	53.729	70.5786
9.95735	229.027	748.534		9.28626	0	0		10.4678	70.9524	60.9667
9.97402	207.872	356.864		9.30294	1.8e-05	0		10.4844	99.6525	42.1195
9.9907	103.182	264.538		9.31961	7e-06	0		10.5011	104.048	43.8002
10.0074	39.6175	207.471		9.33628	0	0		10.5178	95.4496	16.5363
10.024	33.8613	98.0969		9.35295	0	0		10.5344	112.23	15.6001
10.0407	17.2087	45.9769		9.36962	0	3.74216e-05		10.5511	132.91	44.8898
10.0574	22.4179	45.3492		9.3863	2.3e-05	2.21127e-05		10.5678	123.117	62.817
10.0741	26.1984	24.1717		9.40297	2.9e-05	2.21127e-05		10.5845	60.697	35.4457
10.0907	5.26549	7.10149		9.41964	2.7e-05	0		10.6011	47.6927	14.878
10.1074	2.1e-05	7.31421e-05		9.43631	0	0		10.6178	40.0717	37.188
10.1241	0	2.55147e-05		9.45298	5.8e-05	0		10.6345	41.4255	32.41
10.1408	0	0		9.46966	2e-06	0		10.6512	45.0915	6.45953
10.1574	1e-05	0		9.48633	0	8.5049e-06		10.6678	36.4749	44.3665
10.1741	4.6e-05	0		9.503	0	0		10.6845	38.9642	58.7972
10.1908	4.7e-05	0		9.51967	0	0		10.7012	56.6386	38.7667
10.2074	0	0		9.53634	8e-05	0		10.7179	51.4298	38.1032
10.2241	0	2.38137e-05		9.55302	4.3e-05	8.1647e-05		10.7345	36.5415	18.603
10.2408	0	3.23186e-05		9.56969	0	0		10.7512	50.7208	60.2843
10.2575	3.6e-05	0		9.58636	0	0		10.7679	67.1337	87.1332
10.2741	2.4e-05	0		9.60303	0	8.5049e-06		10.7845	57.9923	38.7973
10.2908	1.1e-05	0		9.6197	1e-05	0		10.8012	52.4894	27.1015
10.3075	0	0		9.63638	0.73834	0		10.8179	57.3719	15.0001
10.3241	8e-06	0		9.65305	0.75703	0		10.8346	64.4465	0.73391
10.3408	3e-06	0		9.66972	5.9e-05	0.000161593		10.8512	40.2379	0
10.3575	1.5e-05	0		9.68665	0	0.000113966		10.8679	18.1088	16.3623
10.3742	1.6e-05	0		9.70332	0	5.27304e-05		10.8846	29.7025	34.4372
10.3908	1.2e-05	1.36078e-05		9.72	0	4.93284e-05		10.9012	37.5485	18.1079
10.4075	0.42709	0		9.73667	0	0		10.9179	52.8923	8.09101
10.4242	0.43792	0		9.75334	3e-05	3.91225e-05		10.9346	57.7353	55.7072
10.4408	1.5e-05	0		9.77001	1.1e-05	7.14412e-05		10.9513	37.0384	57.012
10.4575	0.000182	8.5049e-06		9.78668	1.1e-05	0		10.9679	13.023	13.2511
10.4742	0.000174	0		9.80336	0	0		10.9846	0.38876	29.7223
10.4909	0	0		9.82003	0	3.06176e-05		11.0013	6.63313	32.2889
10.5075	0	0		9.8367	0	3.06176e-05		11.018	6.8014	11.4393
10.5242	0	0		9.85338	0	0		11.0346	59.3282	24.523
10.5409	0	0		9.87005	0	2.72157e-05		11.0513	101.478	37.2832
10.5576	3.6e-05	0.000117368		9.88672	3.5e-05	0		11.068	49.471	28.6179
10.5742	0	0		9.90339	0	0		11.0846	45.1052	26.6654
10.5909	0	7.48431e-05		9.92007	4e-06	0		11.1013	58.0103	47.583
10.6076	0	2.38137e-05		9.93674	2.9e-05	0		11.118	15.4729	50.3546
10.6242	0	0		9.95341	4e-06	7.65441e-05		11.1347	10.2567	20.8345
10.6409	0	2.21127e-05		9.97008	0	0		11.1513	25.4635	31.0364
10.6576	0	3.57206e-05		9.98676	0	0		11.168	26.0933	45.0609
10.6743	5.9e-05	0		10.0034	0	0		11.1847	12.039	22.811
10.6909	0	0		10.0201	5e-05	0		11.2013	15.0596	3.03396e-05
10.7076	0	3.74216e-05		10.0368	0	0		11.218	16.0916	3.50608
10.7243	0	3.91225e-05		10.0534	0	6.97402e-05		11.2347	3.93453	4.27418
10.741	0.000107	0		10.0701	0	3.91225e-05		11.2514	23.2717	6.75065
10.7576	0	3.57206e-05		10.0868	8.4e-05	3.91225e-05		11.268	24.4788	11.8131
10.7743	0	0		10.1035	3.1e-05	3.06176e-05		11.2847	4.31655	5.01527
10.791	0	0		10.1201	0	4.08235e-05		11.3014	0	0
10.8077	2.2e-05	0		10.1368	0	0		11.3181	10.0802	0
10.8243	1.5e-05	5.44314e-05		10.1535	0	0		11.3347	10.3359	6.97277
10.841	6.8e-05	4.25245e-05		10.1701	0	5.95343e-05		11.3514	0	7.14966
10.8577	0	4.76274e-05		10.1868	0	5.10294e-06		11.3681	0	0
10.8743	0	5.10294e-05		10.2035	0	2.38137e-05		11.3847	6.70535	0
10.891	0	5.10294e-06		10.2202	0	1.87108e-05		11.4014	42.7016	0
10.9077	0	0		10.2368	4e-05	2.04118e-05		11.4181	42.3059	5.7602
10.9244	0	0		10.2535	4.1e-05	0		11.4348	22.9486	5.90633
10.941	0	0		10.2702	0	0		11.4514	33.6172	0
10.9577	0	0		10.2869	0	0		11.4681	14.8301	0
10.9744	3e-06	0		10.3035	0	0		11.4848	2.08791	0
10.991	3e-06	1.36078e-05		10.3202	1.6e-05	0		11.5015	7.18507	0
11.0077	7e-06	0		10.3369	0	0		11.5181	17.2396	0
11.0244	1.9e-05	6.29363e-05		10.3536	0	0		11.5348	28.5844	0
11.0411	0	1.53088e-05		10.3702	9e-06	0		11.5515	19.5418	7.17951
11.0577	0	0		10.3869	0	0		11.5681	35.2843	7.36164
11.0744	0	0		10.4036	5.2e-05	0		11.5848	36.0281	0
11.0911	0	1.87108e-05		10.4202	0	0		11.6015	1.12388	0
11.1077	0	0		10.4369	0	0		11.6182	0	0
11.1244	8.4e-05	0		10.4536	0	0		11.6348	0	0
11.1411	0.000113	0		10.4703	0	0		11.6515	0	0
11.1578	2.4e-05	0		10.4869	0	0		11.6682	0	0
11.1744	2.5e-05	0		10.5036	1.7e-05	0.000105461		11.6849	0	0
11.1911	0	0		10.5203	4.7e-05	8.5049e-05		11.7015	0	0
11.2078	3.8e-05	0		10.5369	2.8e-05	0.00012077		11.7182	0	11.9514
11.2245	8e-06	0		10.5536	0	4.93284e-05		11.7349	0	16.6881
11.2411	9e-06	5.61323e-05		10.5703	0	0		11.7515	0	5.39239
11.2578	3e-05	0		10.587	1.4e-05	0		11.7682	0	28.1819
11.2745	3.5e-05	3.23186e-05		10.6036	0	0		11.7849	0	51.9674
11.2911	4e-06	4.42255e-05		10.6203	0	0		11.8016	0	23.3355
11.3078	1.2e-05	0		10.637	0	0		11.8182	0	0.69844
11.3245	0	0		10.6537	0	0		11.8349	0	0.71568
11.3412	0	0		10.6703	0	0		11.8516	0	23.1618
11.3578	0	0		10.687	0	0		11.8682	0	23.7493
11.3745	3e-05	0		10.7037	0	0		11.8849	0	1.19882
11.3912	0	9.52549e-05		10.7203	0	0		11.9016	0	32.6839
11.4078	0	7.48431e-05		10.737	6.4e-05	0.000170098		11.9183	0	63.8017
11.4245	0	1.53088e-05		10.7537	0	1.36078e-05		11.9349	3.02637	32.3494
11.4412	0	6.80392e-06		10.7704	0	0		11.9516	3.10314	2.36365
11.4579	0	4.25245e-05		10.787	0	0		11.9683	0	2.42362
11.4745	9e-06	0		10.8037	0	0		11.9849	0	0
11.4912	1.4e-05	0		10.8204	0	0.000100358		12.0016	0.000114	0
11.5079	5e-06	0		10.837	0	0		12.0183	0.000117	0
11.5245	2e-06	0		10.8537	5.6e-05	0		12.035	0	0
11.5412	1e-05	0		10.8704	0	0		12.0516	0.32936	0
11.5579	1e-05	0		10.8871	0	0		12.0683	0.33771	0
11.5746	0	6.80392e-06		10.9037	0	4.25245e-05		12.085	0	0
11.5912	8e-06	8.5049e-06		10.9204	0	0		12.1016	0	0
11.6079	1.4e-05	0		10.9371	0	0		12.1183	0	0
11.6246	0	0		10.9537	0	0		12.135	0	0
11.6413	3e-05	0		10.9704	0	0		12.1517	0	0
11.6579	4.4e-05	0		10.9871	0	0		12.1683	0	0
11.6746	0	8.5049e-06		11.0038	0	0		12.185	0	0
11.6913	0	0		11.0204	0	0		12.2017	0	0
11.708	0	4.42255e-05		11.0371	0	0		12.2184	0	0
11.7246	1.4e-05	0		11.0538	0	0		12.235	0	0
11.7413	3.8e-05	0		11.0705	0	4.93284e-05		12.2517	0	0
11.758	2e-05	0		11.0871	5e-05	5.10294e-05		12.2684	0.01207	0
11.7746	4.8e-05	0		11.1038	3e-05	0.000149686		12.2851	0.01238	0
11.7913	9e-05	0		11.1205	1.3e-05	0.000122471		12.3017	0	0
11.808	3.3e-05	0		11.1372	1.9e-05	0.00015649		12.3184	0	0
11.8247	0	0		11.1538	3.7e-05	0		12.3351	0	0
11.8413	0	2.72157e-05		11.1705	3.7e-05	0		12.3517	0	0
11.858	0	0		11.1872	0	0		12.3684	0	0
11.8747	0	5.78333e-05		11.2038	0	2.38137e-05		12.3851	0	0
11.8913	3.7e-05	3.91225e-05		11.2205	0	0		12.4018	0	0
11.908	0	0		11.2372	0	0		12.4184	0	0
11.9247	0	1.02059e-05		11.2539	0	0		12.4351	0	0
11.9414	4e-06	0.000112265		11.2705	0	0		12.4518	0	0
11.958	0	0		11.2872	0	0		12.4685	0	0
11.9747	0	0		11.3039	0	0		12.4851	0	0
11.9914	0	0		11.3206	0	0		12.5018	0	0
12.0081	0	0		11.3372	0	0		12.5185	0	0
12.0247	3.5e-05	4.76274e-05		11.3539	0	1.53088e-05		12.5351	0	0
12.0414	3.6e-05	4.93284e-05		11.3706	5.5e-05	0.000200716		12.5518	0	0
12.0581	4.6e-05	0		11.3872	0	3.91225e-05		12.5685	0	0
12.0747	3.5e-05	0		11.4039	4.4e-05	3.06176e-05		12.5852	0	0
12.0914	0	0		11.4206	0	0		12.6018	0	0
12.1081	3.8e-05	0		11.4373	0	0		12.6185	0	0
12.1248	6.3e-05	0		11.4539	0	0		12.6366	0	0
12.1414	0	4.59265e-05		11.4706	0	1.53088e-05		12.6532	0	0
12.1581	4e-06	2.21127e-05		11.4873	0	0		12.6699	0	0
12.1748	0	0		11.5039	1e-05	0		12.6866	0	0
12.1914	0	0		11.5206	0	0		12.7033	0	0
12.2081	0	0		11.5373	0	0		12.7199	0	0
12.2248	1.3e-05	0		11.554	0	0		12.7366	0	0
12.2415	3e-06	0		11.5706	0	0		12.7533	0	0
12.2581	0	0		11.5873	0	0		12.7699	0	0
12.2748	0	3.57206e-05		11.604	0	0		12.7861	0	0
12.2915	0	1.70098e-05		11.6206	0	6.46372e-05		12.8027	0	0
12.3082	1.6e-05	2.38137e-05		11.6373	0	3.40196e-05		12.8194	0	0
12.3248	1.7e-05	0		11.654	0	0		12.8361	0.07664	0
12.3415	0	0		11.6707	1.6e-05	0		12.8528	0.07859	0
12.3582	0	0		11.6873	0	0		12.8694	0	0
12.3749	2.3e-05	7.82451e-05		11.704	0	3.40196e-06		12.8861	0.08294	0
12.3915	8.5e-05	0		11.7207	1e-06	0		12.9028	0.12915	0
12.4082	9e-06	0		11.7374	0	7.48431e-05		12.9194	0	0
12.4249	3e-06	0		11.754	0	7.99461e-05		12.9361	0	0
12.4415	3e-06	0		11.7707	0.000125	0		12.9528	0	0
12.4582	1.7e-05	0		11.7874	0.000126	0		12.9695	0	0
12.4749	0	0		11.8041	0	4.59265e-05		12.9861	0	0
12.4916	8e-06	0		11.8207	0.48205	0.000154789		13.0028	0.43671	0
12.5082	1e-05	3.40196e-05		11.8374	0.49428	0.000105461		13.0195	0.44786	0
12.5249	0	3.40196e-05		11.8541	1.8e-05	0		13.0361	7.3e-05	0
12.5416	0	1.70098e-06		11.8707	1.8e-05	3.23186e-05		13.0528	0	0
12.5582	0	3.06176e-05		11.8874	0	6.12353e-05		13.0695	0	0
12.5749	0	5.10294e-05		11.9041	0	0		13.0862	0.168	0
12.5916	0	2.38137e-05		11.9207	0	0		13.1028	0.17226	0
12.6083	0	1.19069e-05		11.9374	0	0		13.1195	0	0
12.6252	1.6e-05	5.10294e-05		11.9541	0	0		13.1362	0	0
12.6419	8.1e-05	0.000129274		11.9708	0	0.00010376		13.1529	0	0
12.6586	8.8e-05	0.000115667		11.9874	2e-06	0		13.1695	3.48264	0
12.6752	5.4e-05	7.14412e-05		12.0041	2.3e-05	0		13.1862	3.57099	0
12.6919	5.2e-05	6.97402e-05		12.0208	0	0		13.2029	0	0
12.7086	4.7e-05	2.89167e-05		12.0375	0	0		13.2195	0	0
12.7253	0.000105	0.000112265		12.0541	0	0		13.2362	0	0
12.7419	0.000137	9.35539e-05		12.0708	0	0.000105461		13.2529	0	0
12.7586	0	6.80392e-06		12.0875	0	0		13.2696	0	0
12.7758	0	6.97402e-05		12.1041	0	0		13.2862	0	0
12.7925	0.000161	0.000700804		12.1208	0	0		13.3029	0	0
12.8092	0.00051	0.00157		12.1375	0	0		13.3187	0	0
12.8259	0.000495	0.00132		12.1542	0	0		13.3354	0	0
12.8425	0.000534	0.00097126		12.1708	2.3e-05	0		13.3521	0	0
12.8592	0.000733	0.000705907		12.1875	2.4e-05	0		13.3688	0.87751	0
12.8759	0.000383	0.000654877		12.2042	0	0		13.3854	0.89977	61.4468
12.8925	0.000102	0.000605549		12.2209	0	6.46372e-05		13.4021	0	102.373
12.9092	0.00026	0.000341897		12.2375	0	0		13.4188	0	73.0674
12.9259	0.000394	0.000928735		12.2542	0	0		13.4354	0	38.9513
12.9426	0.000289	0.00104		12.2709	0	0		13.4521	0	3.81364
12.9592	0.000408	0.000796059		12.2875	0	7.65441e-05		13.4688	0	0
12.9759	0.000462	0.000540912		12.3042	0	0.00012077		13.4855	0	0
12.9926	0.000498	0.000377618		12.3209	0	0		13.5021	0	0
13.0092	0.000957	0.000159892		12.3376	0	0		13.5188	0	0
13.0259	0.00115	0.00012077		12.3542	0	0.000115667		13.5355	0	4.50615
13.0426	0.000875	0.0013		12.3709	0	0		13.5521	0	4.62047
13.0593	0.00039	0.00146		12.3876	1e-05	0		13.5688	0	0
13.0759	0.000233	0.000896416		12.4042	0	0		13.5855	0	0.17319
13.0926	0.000354	0.0013		12.4209	0	0.000153088		13.6021	0	0.17758
13.1093	0.000483	0.00121		12.4376	4.2e-05	5.95343e-05		13.6188	0	0
13.1259	0.00061	0.000753534		12.4543	0.000114	4.08235e-05		13.6355	0	0
13.1426	0.000502	0.000311279		12.4709	1.5e-05	1.19069e-05		13.6521	0	0
13.1593	7.7e-05	0.000285765		12.4876	2.6e-05	4.42255e-05		13.6688	0	0
13.176	0	0.000828377		12.5043	0	3.23186e-05		13.6855	0	0
13.1926	0.000155	0.00104		12.5209	0	0		13.7021	0	0
13.2093	0.000617	0.000683794		12.5376	4.3e-05	0		13.7188	0	0
13.226	0.000826	0.000221127		12.5543	4.4e-05	0		13.7355	0	0
13.2426	0.000365	0.000887912		12.571	0	0.000115667		13.7522	0	0
13.2593	0.000392	0.00176		12.5876	0	5.44314e-05		13.7688	0	0
13.276	0.000547	0.000901519		12.6043	0.000178	0		13.7855	0	0
13.2927	0.000119	0.00038272		12.621	9.3e-05	0		13.8022	0	0

## Sheet: Fig 4G
	UDP-glucose	UDP-galactose	UDP-glcNAC/UDPG-galNAC	UDP-glcA	UDP-xyl	GDP-fuc	GDP-Man	CMP-sialic_acid	TIC
ctrl 1	9746	2746	406137	5911				30076	109784
ctrl 2	9112	2384	361457	6571				28840	97046
ctrl 3	11703	2499	496054	1412				34777	132086
SLC35A2OE 1	9047	3202	176250	4141				13151	51222
SLC35A2OE 2	9171	2950	207186	4337				14208	57053
SLC35A2OE 3	5595	1964	152588	3025				10939	43364
	normalization
	UDP-glucose	UDP-galactose	UDP-glcNAC/UDPG-galNAC	UDP-glcA	UDP-xyl	GDP-fuc	GDP-Man	CMP-sialic_acid
ctrl 1	0.981766	1.09548	0.992728	1.22144				0.984951
ctrl 2	1.03838	1.0759	0.999484	1.53605				1.06844
ctrl 3	0.979853	0.828616	1.00779	0.24251				0.946606
SLC35A2OE 1	1.9533	2.73784	0.923357	1.834				0.923073
SLC35A2OE 2	1.7777	2.26458	0.974493	1.7245				0.89534
SLC35A2OE 3	1.42689	1.98361	0.944252	1.58251				0.906947

## Sheet: Fig 5H
	UDP-glc & UDP-gal				CMP-SA					UDP-glcNAc & UDP-galNAc
	Ctrl	SLC35D3OE			Ctrl		SLC35D3OE			Ctrl	SLC35D3OE
Retention time (min)	Ion intensity			Retention time (min)	Ion intensity	Retention time (min)	Ion intensity		Retention time (min)	Ion intensity
5.45358	0.000539	0.000895679		4.62016	0.08901	4.77016	0.03411		5.8144	0	0
5.47025	0.000539	0.000895679		4.63683	0.08901	4.78684	0.03411		5.83107	0	0
5.48692	0.000475	0.000740024		4.6535	0.04867	4.8035	0.06325		5.84774	8.5e-05	0
5.50359	0.000386	0.000608112		4.67017	0.00245	4.82017	0.07574		5.86441	8.7e-05	0
5.52026	0.000598	0.000823128		4.68683	0.02663	4.83684	0.03818		5.88108	0	0
5.53693	0.00106	0.0014		4.7035	0.06219	4.85351	0.07337		5.89775	0	0
5.5536	0.000881	0.00152		4.72017	0.05788	4.87018	0.08468		5.91442	0	0
5.57027	0.000499	0.000999889		4.73684	0.06641	4.88685	0.05474		5.93109	0	0
5.58694	0.000571	0.000960316		4.75351	0.09745	4.90351	0.05577		5.94776	0	0
5.60361	0.000747	0.000758491		4.78017	0.07496	4.93017	0.04118		5.96444	0	0
5.62028	0.00103	0.000271738		4.79684	0.00278	4.94684	0.000947125		5.98111	0	0
5.63695	0.00085	0		4.81351	0	4.96351	0.000612069		5.99778	0	0
5.65362	0.000475	0.000246675		4.83018	0.00114	4.98018	0.000829723		6.01445	0	0
5.67029	0.000667	0.00113		4.84684	0.000649	4.99685	0.000561943		6.03112	0	0
5.68696	0.00119	0.000951082		4.86351	5.6e-05	5.01352	0.000168847		6.04779	0	0
5.70363	0.00127	0.000538199		4.88018	0.000456	5.03019	0.000213697		6.06446	0	0
5.7203	0.00118	0.000915466		4.89685	0.000334	5.04685	0.000236122		6.08113	0	0
5.73697	0.00103	0.00133		4.91352	0.000757	5.06352	0.000786193		6.0978	0	0
5.75364	0.00082	0.000929976		4.93019	0.000377	5.08019	0.000776959		6.11447	0	0
5.77031	0.00143	0.00107		4.94686	0.000567	5.09686	0.000251951		6.13114	0	0
5.78698	0.00111	0.000683302		4.96353	0.000574	5.11353	0.000572496		6.14781	0	0
5.80365	0.00054	0.00059624		4.9802	9.1e-05	5.1302	0.000527646		6.16448	0	0
5.82032	0.000579	0.000255908		4.99686	8.1e-05	5.14687	0.00029812		6.18115	0	0
5.83699	0.000346	0.000543476		5.01353	0.000241	5.16354	0.000234802		6.19782	0	0
5.85366	0.000193	0.000997251		5.0302	0.000588	5.1802	0.000288886		6.21449	0	0
5.87033	0.000576	0.000753215		5.04687	0.000594	5.19687	0.000554028		6.23116	0	0
5.887	0.00044	0.000776959		5.06354	9.9e-05	5.21354	0.000271738		6.24784	0	0
5.90367	0.000402	0.000803341		5.08021	0.000528	5.23021	0.000151698		6.26451	0	0
5.92034	0.000603	0.000765087		5.09688	0.000429	5.24688	0.000860063		6.28118	0	0
5.93701	0.000621	0.000956359		5.11354	0.000176	5.26355	0.000951082		6.29785	0	0
5.95726	0.000539	0.000852149		5.13022	0.000178	5.28022	0.000133231		6.31452	0	0
5.97393	0.000219	6.72749e-05		5.14688	0.000242	5.29689	0.000101572		6.33119	0	0
5.9906	0	0		5.16355	0.000209	5.31355	0.000130592		6.34786	0	0
6.00727	0.00105	0.0013		5.18022	0.000436	5.33022	0.000437946		6.36453	0	0
6.02394	0.000141	0		5.19689	0.000436	5.34689	0.000602836		6.3812	0	0
6.04062	0.00106	0.00146		5.21356	0.000129	5.36356	0.00032846		6.39787	0	0
6.05728	0.000719	0.000379905		5.23023	0.000108	5.38023	0.00108		6.41454	0	0
6.07396	0.000904	0.000547433		5.24689	0.000196	5.3969	0.00185		6.43121	0	0
6.09063	0.000326	0.000976145		5.26356	0.000417	5.41357	0.000802022		6.44788	0	0
6.1073	0.000342	0.000893041		5.28023	0.000192	5.43024	0.000139826		6.46455	0	0
6.12397	0.000568	0.000304716		5.2969	0.000987	5.44691	0.000327141		6.48122	0	0
6.14064	0.000455	0.00113		5.31607	0.000847	5.46608	0.00121		6.49789	0	0
6.15731	0.000395	0.00174		5.33274	0.000249	5.48275	0.000788831		6.51456	0	0
6.17398	0.000309	0.00106		5.34941	0.000896	5.49942	0.000960316		6.53123	0	0
6.19065	0.00041	0.000585687		5.36608	0.000906	5.51609	0.000997251		6.5479	0	0
6.20732	0.000552	0.000485434		5.38275	0.000595	5.53276	0.0012		6.56457	0	0
6.22399	0.000547	0.000874574		5.39942	0.000787	5.54943	0.00139		6.58124	0	0
6.24066	0.000597	0.00154		5.41609	0.000675	5.5661	0.00151		6.59791	0	0
6.25733	0.00117	0.00104		5.43276	0.000783	5.58276	0.0018		6.61458	0	0
6.274	0.00126	0.000588325		5.44943	0.00102	5.59943	0.00132		6.63125	0	0
6.29067	0.000874	0.000945806		5.4661	0.0012	5.61611	0.000729471		6.64792	0	0
6.30734	0.00103	0.000587006		5.48277	0.00125	5.63278	0.00173		6.66459	0	0
6.32401	0.00103	0.000707046		5.49944	0.000831	5.64945	0.00199		6.68126	0	0
6.34068	0.00101	0.000464329		5.51611	0.000806	5.66612	0.000466967		6.69793	0	0
6.35735	0.000568	0.000213697		5.53278	0.000964	5.68278	0.000827085		6.7146	0	0
6.37402	0.0011	0.000899637		5.54945	0.000678	5.69946	0.00141		6.73127	0	0
6.39069	0.00112	0.000726833		5.56612	0.00103	5.71613	0.00119		6.74794	0	0
6.40736	0	0.000579092		5.58279	0.00118	5.7328	0.000970869		6.76461	0	0
6.42403	0.000887	0.000594921		5.59946	0.000454	5.74947	0.000815213		6.78128	0	0
6.4407	0.00125	0.00055139		5.61613	0.000737	5.76614	0.000854787		6.79796	0	0
6.45738	0.000566	0.000683302		5.6328	0.00105	5.78281	0.00126		6.81463	0	0
6.47405	0.000578	0.000799384		5.64947	0.000646	5.79948	0.00243		6.83129	0	0
6.49071	0.000617	0.000778278		5.66614	0.00113	5.81615	0.00163		6.84796	0	0
6.50738	0.000678	0.000138507		5.68281	0.00121	5.83282	0.000767725		6.86463	0	0
6.52405	0.0005	0.000222931		5.69948	0.000658	5.84949	0.00161		6.88131	0	0
6.54073	0.000163	0.00102		5.71615	0.00021	5.86616	0.00123		6.89798	0	0
6.5574	0.000366	0.00122		5.73282	0.000779	5.88283	0.00115		6.91465	0	0
6.57407	0.000554	0.00119		5.74949	0.000689	5.8995	0.00089436		6.93132	0	0
6.59074	0.000456	0.00112		5.76616	0.000709	5.91617	0.000779597		6.94798	0	0
6.60741	0.000653	0.000783555		5.78283	0.000763	5.93283	0.000947125		6.96466	0	0
6.62408	0.000527	0.000782235		5.7995	0.000662	5.94951	0.00159		6.98133	0	0
6.64075	6.9e-05	0.000692536		5.81796	0.000855	5.96796	0.00184		6.998	0	0
6.65742	9.1e-05	0.000617346		5.83463	0.000361	5.98463	0.000493349		7.01467	0	0
6.67409	0.00033	0.000709684		5.85129	0	6.0013	0		7.03134	0	0
6.69076	0.000315	0.000645047		5.86797	0.00234	6.01797	0.00324		7.04801	0	0
6.70743	0.000502	0.000650324		5.88464	3.2e-05	6.03465	0		7.06468	0	0
6.7241	0.00113	0.000765087		5.90131	0.00284	6.05131	0.00213		7.08135	0	0
6.74077	0.00107	0.00119		5.91798	0.00163	6.06799	0.00202		7.09802	0	0
6.75744	0.000331	0.00115		5.93465	0.000578	6.08466	0.00156		7.11469	0	0
6.77411	0.000598	0.000585687		5.95132	0.00117	6.10133	0.00247		7.13136	0	0
6.79079	0.000645	0.00038782		5.96799	0.000968	6.118	0.00252		7.14803	0	0
6.80746	0.000174	0.000480158		5.98466	0.000969	6.13467	0.00159		7.1647	0	0
6.82413	0.000372	0.000497307		6.00133	0.000836	6.15134	0.00159		7.18137	0	0
6.8408	0.000749	0.00061207		6.018	0.000464	6.16801	0.00223		7.19804	0	0
6.85747	0.00116	0.000819171		6.03467	0.000473	6.18468	0.00292		7.21471	0	0
6.87414	0.000692	0.000675387		6.05134	0.000462	6.20135	0.00264		7.23138	0	0
6.89081	0.000877	0.000352204		6.06801	0.00158	6.21802	0.00117		7.24805	0	0
6.90748	0.00116	0.000617346		6.08468	0.00141	6.23469	0.000667472		7.26472	0	0
6.92415	0.00045	0.00050654		6.10135	0.000189	6.25136	0.00108		7.28139	0	0
6.94082	0.000515	7.65087e-05		6.11802	0.00127	6.26803	0.00113		7.29806	0	0
6.95749	0.000542	0.000717599		6.1347	0.00209	6.2847	0.000841595		7.31473	0	0
6.97416	0.000936	0.000914147		6.15137	0.00109	6.30137	0.000958997		7.3314	0	0
6.99083	0.000863	0.000875893		6.16804	0.00103	6.31804	0.00149		7.34807	0	0
7.0075	0.000214	0.0011		6.18471	0.00189	6.33471	0.00131		7.36474	0	0
7.02417	0.000548	0.00086534		6.20138	0.00169	6.35138	0.00124		7.38141	0	0
7.04085	0.000627	0.000601517		6.21805	0.00145	6.36805	0.00146		7.39808	0	0
7.05752	0.000355	0.000929976		6.23472	0.00134	6.38472	0.00133		7.41475	0	0
7.07418	0.00103	0.00121		6.25139	0.00173	6.40139	0.000965592		7.43142	0	0
7.09085	0.00113	0.00056722		6.26806	0.00172	6.41806	0.00126		7.44809	0	0
7.10753	0.000272	0.000320545		6.28473	0.000563	6.43473	0.00268		7.46476	0	0
7.1242	0.000659	0.000914147		6.3014	0.000903	6.45141	0.00279		7.48143	0	0
7.14087	0.000878	0.00105		6.31807	0.000948	6.46808	0.000886445		7.4981	0	0
7.15754	0.00047	0.000390458		6.33474	0.000649	6.48474	0.00106		7.51478	0	0
7.17421	0.000942	0.000633175		6.35141	0.00121	6.50141	0.00173		7.53145	0	0
7.19088	0.000789	0.000962954		6.36808	0.000638	6.51808	0.00153		7.54812	0	0
7.20755	0.000213	0.000701769		6.38476	0.000545	6.53476	0.00161		7.56479	0.000179	0
7.22422	0.0004	0.0011		6.40143	0.00083	6.55143	0.00148		7.58146	0.000184	0
7.24089	0.00127	0.000780916		6.4181	0.000567	6.5681	0.00164		7.59813	0	0
7.25756	0.00119	0.000840277		6.43476	0.000884	6.58477	0.00163		7.6148	0	0
7.27423	0.000199	0.00123		6.45144	0.000746	6.60144	0.00113		7.63147	0	0
7.2909	0.00101	0.00046301		6.46811	0.000756	6.61811	0.00151		7.64814	0	0
7.30757	0.00103	0.000354842		6.48478	0.00237	6.63478	0.00196		7.66481	0	0
7.32424	4e-05	0.00028361		6.50145	0.00204	6.65145	0.00205		7.68148	0	0
7.34091	0.00021	0		6.51812	0.000401	6.66812	0.00396		7.69815	0	0
7.35758	0.000241	0.00119		6.53479	0.00104	6.68479	0.00365		7.71482	0	0
7.37425	0.000215	0.00154		6.55146	0.00148	6.70146	0.00102		7.73149	0	0
7.39092	0.000441	0		6.56813	0.00137	6.71813	0.00163		7.74816	0	0
7.40759	0.000604	0.000309992		6.5848	0.00104	6.7348	0.00244		7.76483	0	0
7.42426	0.000427	0.00062658		6.60147	0.00177	6.75147	0.000956358		7.7815	0	0
7.44093	0.000433	0.000525008		6.61814	0.00129	6.76814	0.00186		7.79817	0	0
7.45761	0.000722	0.000451137		6.63481	0.00084	6.78482	0.00193		7.81484	0	0
7.47428	0.00077	0.000459052		6.65148	0.00186	6.80149	0.00111		7.83151	0	0
7.49095	0.00122	0.00073079		6.66815	0.000588	6.81816	0.00209		7.84818	0	0
7.50762	0.000815	0.000476201		6.68482	0.00163	6.83483	0.00138		7.86485	0	0
7.52429	0	0.000391777		6.70149	0.00259	6.8515	0.00196		7.88153	0	0
7.54096	0.000231	0.000426074		6.71817	0.00174	6.86817	0.00267		7.8982	0	0
7.55763	0.000586	0.000747938		6.73484	0.00144	6.88484	0.00127		7.91487	0	0
7.5743	0.00047	0.000398373		6.75151	0.00166	6.90151	0.00189		7.93153	0	0
7.59097	0.000632	0.000199186		6.76818	0.00258	6.91818	0.00188		7.9482	0	0
7.60764	0.000227	0.000829724		6.78485	0.00201	6.93485	0.00132		7.96488	0	0
7.62431	0.000175	0.000993294		6.80152	0.00189	6.95152	0.00222		7.98155	0	0
7.64098	0.000131	0.000769044		6.81819	0.00222	6.96819	0.00179		7.99822	0	0
7.65765	0.000145	0.000807299		6.83486	0.00146	6.98486	0.00148		8.01489	0	0
7.67432	0.00045	0.00084951		6.85153	0.00108	7.00153	0.00156		8.03156	0	0
7.69099	0.00138	0.00098406		6.8682	0.00164	7.0182	0.00148		8.04823	0	0
7.70766	0.00103	0.00103		6.88487	0.00162	7.03487	0.00192		8.0649	0	0
7.72433	1.7e-05	0.000311311		6.90154	0.0014	7.05154	0.00116		8.08157	0	0
7.741	0.000305	0.000680664		6.91821	0.00215	7.06821	0.000375948		8.09824	0	0
7.75767	0.000351	0.00122		6.93488	0.00207	7.08488	0.00128		8.11491	0	0
7.77434	0.000357	0.000800703		6.95155	0.00139	7.10155	0.00261		8.13158	0	0
7.79101	0.000563	0.00131		6.96822	0.00113	7.11823	0.00213		8.1493	0	0
7.80768	0.000424	0.0014		6.98489	0.000915	7.1349	0.00179		8.16598	0	0
7.82435	0.000199	0.000774321		7.00156	0.000567	7.15157	0.00241		8.18265	0	0
7.84102	0.000104	0.00112		7.01823	0.00107	7.16824	0.00143		8.19932	0	0
7.85769	0.000479	0.00109		7.0349	0.00165	7.18491	0.00141		8.216	0	0
7.87437	0.000531	0.00053688		7.05157	0.00101	7.20158	0.00215		8.23267	0	0
7.89104	0.000663	0.000666153		7.06824	0.00133	7.21825	0.00246		8.24934	0	0
7.90771	0.000857	0.000552709		7.08491	0.00174	7.23492	0.00155		8.26601	0	0
7.92438	0.000441	0.000480158		7.10158	0.00174	7.25159	0.000761129		8.28268	0	0
7.94105	0.000536	0.000747938		7.11826	0.0014	7.26826	0.00159		8.29936	0	0
7.95772	0.000786	0.000476201		7.13493	0.000352	7.28493	0.0019		8.31603	0	0
7.97439	0.000526	0.000639771		7.1516	0.000693	7.3016	0.00154		8.33271	0	0
7.99106	0.000533	0.00111		7.16827	0.00144	7.31827	0.00104		8.34938	0	0
8.00773	0.0006	0.00086534		7.18494	0.00159	7.33494	0.00253		8.36605	0	0
8.0244	0.000908	0.000528965		7.20161	0.00109	7.35161	0.00298		8.38272	0	0
8.04108	0.0013	0.000858744		7.21828	0.000782	7.36828	0.00135		8.3994	0	0
8.05774	0.000894	0.000815213		7.23495	0.00153	7.38495	0.0011		8.41607	0	0
8.07441	0.000602	0.0009247		7.25162	0.00113	7.40162	0.00141		8.43274	0	0
8.09108	0.000378	0.00106		7.26829	0.000681	7.41829	0.00207		8.44941	0	0
8.10775	0.000342	0.000228207		7.28496	0.00138	7.43496	0.00202		8.46609	0	0
8.12443	0.00052	0.000460371		7.30163	0.00132	7.45164	0.00153		8.48276	0	0
8.1411	0.000389	0.000771683		7.3183	0.000968	7.46831	0.00265		8.49943	0	0
8.15777	0.000287	0.000916785		7.33497	0.000846	7.48498	0.00239		8.51611	0	0
8.17444	0.000348	0.00166		7.35164	0.00141	7.50165	0.000584368		8.53278	0	0
8.19111	0.000488	0.00136		7.36831	0.00124	7.51832	0.00116		8.54945	0	0
8.20778	0.000252	0.000614708		7.38498	0.000526	7.53499	0.00125		8.56612	0	0
8.22445	0.000787	0.00127		7.40165	0.00107	7.55166	0.00126		8.5828	0	0
8.24112	0.00133	0.00121		7.41832	0.00172	7.56833	0.0023		8.59947	0	0
8.25779	0.000431	0.00031263		7.43499	0.00154	7.585	0.00204		8.61614	0	0
8.27446	0.000586	0.000499945		7.45166	0.00127	7.60167	0.00166		8.63282	0	0
8.2905	0.000762	0.00113		7.46833	0.00131	7.61834	0.0018		8.64949	0	0
8.30717	7.9e-05	0.00108		7.485	0.00123	7.63501	0.0023		8.66616	0	0
8.32384	5.4e-05	7.91469e-06		7.50167	0.0013	7.65168	0.00259		8.68283	0	0
8.34052	9.9e-05	5.27646e-06		7.51834	0.00115	7.66835	0.00237		8.6995	0	0
8.35719	0.00011	0.000230845		7.53501	0.00111	7.68502	0.00106		8.71618	0	0
8.37386	3.6e-05	0		7.55169	0.00163	7.70169	0.000540837		8.73285	0	0
8.39053	3.3e-05	0.000217654		7.56836	0.00161	7.71836	0.00305		8.74952	0	0
8.40721	0.00012	0.000404968		7.58503	0.00113	7.73503	0.00363		8.7662	0	0
8.42388	0.000297	7.51896e-05		7.6017	0.00106	7.7517	0.00188		8.78287	0	0
8.44055	0.000251	0		7.61837	0.000594	7.76837	0.00202		8.79954	0	0
8.45723	4.8e-05	1.58294e-05		7.63504	0.000785	7.78504	0.00154		8.81695	0	0
8.4739	0.000199	9.1019e-05		7.65171	0.0022	7.80171	0.00123		8.83362	0	0
8.49057	0.000222	0.000131912		7.66838	0.00231	7.81838	0.00183		8.85029	0	0
8.50724	0	0.000129273		7.68505	0.00248	7.83505	0.00215		8.86696	0	0
8.52392	8.7e-05	0.000158294		7.70172	0.00202	7.85172	0.00359		8.88364	0	0
8.54059	0.000131	0.00013455		7.71839	0.00183	7.8684	0.00305		8.90031	0	0
8.55726	0.000233	5.6722e-05		7.73506	0.00248	7.88507	0.00149		8.91698	0	0
8.57394	0.000326	0.000130592		7.75173	0.0011	7.90174	0.00236		8.93365	0	0
8.59061	0.000111	0.000196548		7.7684	0.00118	7.91841	0.00243		8.95033	0	0
8.60728	8.7e-05	0.000174123		7.78507	0.00233	7.93508	0.00151		8.967	0	0
8.62395	0.000158	0.000101572		7.80175	0.00144	7.95175	0.00107		8.98367	0	0
8.64063	4.9e-05	0.000369352		7.81842	0.00108	7.96842	0.00114		9.00035	0	0
8.6573	0.000168	0.000523689		7.83509	0.00199	7.98509	0.000944486		9.01702	0	0
8.67397	0.00021	0.000241398		7.85176	0.000987	8.00176	0.000431351		9.03369	0	0
8.69064	0.000139	0.000258547		7.86842	0.000356	8.01843	0.00161		9.05036	0	0
8.70732	0.000247	0.000110806		7.8851	0.00108	8.03511	0.00286		9.06703	0	0
8.72399	0.000296	0.000304716		7.90177	0.00193	8.05177	0.0031		9.08371	0	0
8.74066	0.000221	0.000439265		7.91844	0.00164	8.06844	0.00193		9.10038	0	0
8.75734	0.000114	3.29779e-05		7.93511	0.00066	8.08511	0.000304716		9.11705	0	0
8.77401	8.7e-05	0.000135869		7.95178	0.000976	8.10178	0.00111		9.13372	0	0
8.79068	0.000219	0.000306035		7.96845	0.00112	8.11846	0.00161		9.1504	0	0
8.80736	0.000297	0.000263823		7.98512	0.00185	8.13513	0.00244		9.16707	0	0
8.82403	0.000268	4.48499e-05		8.00179	0.00135	8.1518	0.00253		9.18374	0	0
8.8407	0.000203	0.0001794		8.01846	0.00102	8.16847	0.00218		9.20041	0	0
8.85737	9.3e-05	0.000258547		8.03513	0.00179	8.18514	0.00305		9.21708	0	0
8.87405	0.000168	3.03397e-05		8.0518	0.000707	8.20181	0.00174		9.23375	0	0
8.89072	0.000182	0.000138507		8.06847	0.00113	8.21848	0.00189		9.25043	0	0
8.90739	7.2e-05	0.000205782		8.08514	0.00178	8.23515	0.00323		9.2671	0	0
8.92406	5.8e-05	0.000199186		8.10181	0.00159	8.25182	0.00253		9.28377	2.47889	0
8.94073	0.000126	0.000196548		8.11848	0.00204	8.26849	0.000977464		9.30044	2.54178	0
8.95697	0.000204	0.00025327		8.13516	0.00109	8.28516	0.00216		9.31712	0	0
8.97364	0	0.000113444		8.15225	0.000694	8.30225	0.0024		9.33379	0	0
8.99031	0	0		8.16892	0.000663	8.31892	0.000262504		9.35046	0	0
9.00698	0	0		8.18559	5.5e-05	8.33559	0.000466967		9.36713	0	0
9.02366	1.7e-05	0		8.20226	0.000317	8.35226	0.00077564		9.3838	0	0
9.04033	0	2.50632e-05		8.21894	0.000379	8.36894	0.000440584		9.40048	0	0
9.057	1e-05	0		8.23561	0.000623	8.38561	0.000207101		9.41715	0	0
9.07367	0	6.59558e-05		8.25228	0.000818	8.40228	0.000249313		9.43382	0	0
9.09034	2e-06	7.78278e-05		8.26895	0.000394	8.41896	0.000336374		9.45049	0	0
9.10702	1.1e-05	0		8.28563	0.00017	8.43563	0.000515774		9.46717	0	0
9.12369	1.4e-05	0		8.3023	3.4e-05	8.4523	0.00108		9.48384	0	0
9.14036	0	7.91469e-06		8.31898	0.000332	8.46898	0.000629218		9.50051	0	0
9.15703	0	7.91469e-06		8.33565	0.000581	8.48565	0.00020842		9.51718	0	0
9.17371	1.6e-05	0		8.35232	0.000457	8.50232	0.000362757		9.53385	0.000211	0
9.19038	1.7e-05	0		8.36899	0.0007	8.51899	0.000221611		9.55053	0.000216	0
9.20705	0	0		8.38566	0.000659	8.53567	0.000631856		9.5672	0	0
9.22372	0	0		8.40234	0.000392	8.55234	0.00101		9.58387	0	0
9.2404	6.5e-05	3.16588e-05		8.41901	0.000615	8.56901	0.000507859		9.60054	0	0
9.25707	4.1e-05	0		8.43568	0.000562	8.58568	0.000616027		9.61721	0	0
9.27374	2.8e-05	1.97867e-05		8.45235	0.000356	8.60236	0.000658238		9.63389	0	0
9.29041	4e-06	0		8.46903	0.000222	8.61903	7.91469e-05		9.65056	0	0
9.30709	2.3e-05	0		8.4857	0.000213	8.6357	0.000254589		9.66723	0	0
9.32376	2.1e-05	0		8.50237	0.000296	8.65238	0.000534242		9.68416	0	0
9.34043	7e-06	0		8.51905	0.000201	8.66905	0.000448499		9.70083	0	0
9.3571	2.2e-05	0		8.53572	0.000628	8.68572	0.000445861		9.71751	0	0
9.37378	2.2e-05	0		8.55239	0.000632	8.7024	12.8086		9.73418	0	0
9.39045	2e-06	1.1872e-05		8.56906	0.00048	8.71907	24.0285		9.75085	0	0
9.40712	7.3e-05	1.1872e-05		8.58574	0.000646	8.73574	30.314		9.76752	0	11.1644
9.42379	5e-06	5.40837e-05		8.60241	0.000256	8.75241	76.7925		9.78419	2.92525	11.4477
9.44047	4.8e-05	5.93602e-05		8.61908	0.000128	8.76909	204.413		9.80087	30.7287	0
9.45714	0	1.73764		8.63576	7.8e-05	8.78576	539.841		9.81754	103.466	18.1341
9.47381	9.3e-05	20.1088		8.65243	0.000106	8.80243	1078.23		9.83421	305.497	103.684
9.49048	0.000122	72.1534		8.6691	0.000285	8.81911	1668.38		9.85088	788.491	306.072
9.50716	0	148.724		8.68577	0.90768	8.83578	2448.75		9.86756	1602.38	645.002
9.52383	0	232.014		8.70244	3.10523	8.85245	3433.18		9.88423	3257.63	1450.11
9.5405	0	293.538		8.71912	52.0062	8.86912	4065.52		9.9009	6896.44	2783.78
9.55717	0	221.693		8.73579	202.824	8.8858	4076.55		9.91757	11499.8	5433.96
9.57384	0	264.133		8.75246	374.207	8.90247	3400.92		9.93424	17136.4	9179.23
9.59052	2.30298	401.157		8.76914	575.374	8.91914	3149.24		9.95092	22348.3	14281.5
9.60719	25.7223	331.436		8.78581	1067.22	8.93581	2829.8		9.96759	27123.3	19328.8
9.62386	50.6113	195.572		8.80248	1724.66	8.95249	1864.43		9.98426	31654.3	23063.1
9.64054	72.8448	197.193		8.81945	2328.49	8.96945	1427.76		10.0009	35003.1	27887.8
9.65721	143.854	197.896		8.83612	2756.45	8.98612	1020.21		10.0176	38364.9	31662
9.67388	206.541	56.7304		8.85279	3086.28	9.0028	546.64		10.0343	37033.4	34571
9.69055	254.266	24.7435		8.86946	3347	9.01947	318.854		10.051	32528.7	34715.6
9.70723	260.616	67.9379		8.88614	2924.74	9.03614	194.079		10.0676	26970.7	30186
9.7239	272.908	86.866		8.90281	2593.92	9.05281	180.9		10.0843	20578	27892.9
9.74057	250.799	109.765		8.91948	2173.84	9.06948	78.6859		10.101	15821.3	23534.3
9.75724	186.884	241.444		8.93615	1566.34	9.08616	62.7388		10.1176	11886.8	17880.7
9.77391	238.48	396.727		8.95283	1330.36	9.10283	55.4383		10.1343	8746.58	15367.6
9.79059	202.44	583.43		8.9695	980.079	9.1195	24.8845		10.151	6059.24	11168.5
9.80726	123.834	885.777		8.98617	630.627	9.13617	6.65429		10.1677	3866.05	8128.78
9.82393	114.237	1129.98		9.00284	399.734	9.15285	10.1621		10.1843	2528.6	6196.63
9.8406	75.805	1367.5		9.01952	239.809	9.16952	23.1038		10.201	1846.15	4008.96
9.85727	77.3305	1424.53		9.03619	183.538	9.18619	13.0025		10.2177	1148.67	2743.75
9.87395	104.272	1231.89		9.05286	91.549	9.20286	2.63823e-06		10.2343	668.841	1742.13
9.89062	173.019	1017.47		9.06953	24.5725	9.21953	1.45103e-05		10.251	403.332	1205.04
9.90729	276.628	853.4		9.0862	42.4534	9.23621	1.84676e-05		10.2677	206.559	827.273
9.92396	387.664	784.328		9.10288	37.1063	9.25288	0		10.2844	198.915	524.274
9.94064	611.967	506.954		9.11955	32.2637	9.26955	0		10.301	274.49	448.983
9.95731	893.051	394.921		9.13622	22.1124	9.28623	0		10.3177	227.18	271.854
9.97398	845.68	274.506		9.15289	0.9349	9.3029	0		10.3344	95.9554	109.514
9.99066	905.416	181.128		9.16957	1.5e-05	9.31957	0		10.3511	76.5137	145.987
10.0073	982.926	150.091		9.18624	1.8e-05	9.33624	0		10.3677	50.1791	246.411
10.024	875.351	58.0805		9.20291	0	9.35291	0		10.3844	67.1617	299.36
10.0407	815.383	64.0393		9.21958	0	9.36959	0		10.4011	113.61	123.805
10.0573	774.251	51.2718		9.23625	0	9.38626	0.000100253		10.4177	171.632	40.6336
10.074	503.926	7.90085		9.25293	1.2e-05	9.40293	0		10.4344	133.086	53.2498
10.0907	305.563	1.05529e-05		9.2696	1.2e-05	9.4196	0		10.4511	53.729	58.3117
10.1074	229.027	0		9.28627	0	9.43628	0		10.4678	70.9524	41.7804
10.124	207.872	1.45103e-05		9.30294	1.8e-05	9.45295	0		10.4844	99.6525	98.2023
10.1407	103.182	0		9.31962	7e-06	9.46962	0		10.5011	104.048	124.06
10.1574	39.6175	0		9.33629	0	9.4863	8.96998e-05		10.5178	95.4496	111.279
10.174	33.8613	0		9.35296	0	9.50297	1.31912e-06		10.5344	112.23	101.571
10.1907	17.2087	2.37441e-05		9.36963	0	9.51964	0		10.5511	132.91	55.5606
10.2074	22.4179	0		9.3863	2.3e-05	9.53631	0		10.5678	123.117	55.7017
10.2241	26.1984	0		9.40298	2.9e-05	9.55298	0		10.5845	60.697	60.0632
10.2407	5.26549	0		9.41965	2.7e-05	9.56966	0		10.6011	47.6927	68.2656
10.2574	2.1e-05	0		9.43632	0	9.58633	7.78278e-05		10.6178	40.0717	58.5336
10.2741	0	0		9.45299	5.8e-05	9.603	0		10.6345	41.4255	60.4734
10.2908	0	0		9.46967	2e-06	9.61967	4.6169e-05		10.6512	45.0915	56.6058
10.3074	1e-05	0		9.48634	0	9.63635	2.11058e-05		10.6678	36.4749	79.0573
10.3241	4.6e-05	3.16588e-05		9.50301	0	9.65302	6.99131e-05		10.6845	38.9642	81.6994
10.3408	4.7e-05	0		9.51968	0	9.66969	5.14455e-05		10.7012	56.6386	39.2918
10.3575	0	5.27646e-06		9.53635	8e-05	9.68636	3.95735e-05		10.7179	51.4298	58.7364
10.3741	0	3.03397e-05		9.55303	4.3e-05	9.70304	0		10.7345	36.5415	73.0174
10.3908	0	4.08926e-05		9.5697	0	9.71971	0		10.7512	50.7208	32.081
10.4075	3.6e-05	1.05529e-05		9.58637	0	9.73638	0		10.7679	67.1337	29.4515
10.4241	2.4e-05	6.59558e-06		9.60304	0	9.75305	5.01264e-05		10.7845	57.9923	34.5907
10.4408	1.1e-05	0		9.61971	1e-05	9.76972	5.27646e-06		10.8012	52.4894	20.9576
10.4575	0	0		9.63639	0.73834	9.7864	0		10.8179	57.3719	28.7693
10.4742	8e-06	0		9.65306	0.75703	9.80307	0		10.8346	64.4465	71.4527
10.4908	3e-06	1.71485e-05		9.66973	5.9e-05	9.81974	0		10.8512	40.2379	86.0446
10.5075	1.5e-05	0		9.6864	0	9.83641	0		10.8679	18.1088	44.0268
10.5242	1.6e-05	0		9.70308	0	9.85309	0		10.8846	29.7025	34.8257
10.5409	1.2e-05	0		9.71975	0	9.86976	0		10.9012	37.5485	63.1259
10.5575	0.42709	3.03397e-05		9.73642	0	9.88643	2.2425e-05		10.9179	52.8923	32.4033
10.5742	0.43792	4.88073e-05		9.75309	3e-05	9.9031	0		10.9346	57.7353	2.46364
10.5909	1.5e-05	0		9.76977	1.1e-05	9.91978	0		10.9513	37.0384	36.9077
10.6075	0.000182	0		9.78644	1.1e-05	9.93645	0		10.9679	13.023	49.3404
10.6242	0.000174	0		9.80311	0	9.95312	1.31912e-05		10.9846	0.38876	24.5912
10.6409	0	3.29779e-05		9.81978	0	9.9698	1.31912e-05		11.0013	6.63313	21.8588
10.6576	0	0		9.83646	0	9.98647	0		11.018	6.8014	8.952
10.6742	0	4.74882e-05		9.85313	0	10.0031	0		11.0346	59.3282	0
10.6909	0	0		9.8698	0	10.0198	0		11.0513	101.478	1.67165
10.7076	3.6e-05	5.14455e-05		9.88647	3.5e-05	10.0365	0		11.068	49.471	16.6874
10.7242	0	5.27646e-05		9.90315	0	10.0532	3.4297e-05		11.0846	45.1052	17.427
10.7409	0	0		9.91982	4e-06	10.0698	6.19984e-05		11.1013	58.0103	2.12637
10.7576	0	0		9.93649	2.9e-05	10.0865	0		11.118	15.4729	0
10.7743	0	1.05529e-05		9.95316	4e-06	10.1032	1.84676e-05		11.1347	10.2567	0
10.7909	0	0		9.96984	0	10.1198	2.90205e-05		11.1513	25.4635	0
10.8076	0	0		9.98651	0	10.1365	4.48499e-05		11.168	26.0933	0
10.8243	5.9e-05	0		10.0032	0	10.1532	0		11.1847	12.039	66.2941
10.8409	0	1.71485e-05		10.0198	5e-05	10.1699	0		11.2013	15.0596	67.9759
10.8576	0	0		10.0365	0	10.1865	0		11.218	16.0916	0
10.8743	0	0		10.0532	0	10.2032	4.48499e-05		11.2347	3.93453	0
10.891	0.000107	0		10.0699	0	10.2199	0		11.2514	23.2717	0
10.9076	0	0		10.0865	8.4e-05	10.2365	0		11.268	24.4788	0.32771
10.9243	0	8.17852e-05		10.1032	3.1e-05	10.2532	0		11.2847	4.31655	5.06927
10.941	0	0		10.1199	0	10.2699	6.99131e-05		11.3014	0	13.4146
10.9577	2.2e-05	0		10.1366	0	10.2866	1.1872e-05		11.3181	10.0802	26.1396
10.9743	1.5e-05	0		10.1532	0	10.3032	2.37441e-05		11.3347	10.3359	18.3201
10.991	6.8e-05	0		10.1699	0	10.3199	0		11.3514	0	0
11.0077	0	0		10.1866	0	10.3366	2.11058e-05		11.3681	0	0
11.0243	0	1.05529e-05		10.2033	0	10.3533	2.2425e-05		11.3847	6.70535	0
11.041	0	3.4297e-05		10.2199	0	10.3699	2.2425e-05		11.4014	42.7016	0
11.0577	0	1.97867e-05		10.2366	4e-05	10.3866	0		11.4181	42.3059	0
11.0744	0	0		10.2533	4.1e-05	10.4033	0		11.4348	22.9486	0.000200716
11.091	0	0		10.2699	0	10.42	6.59558e-05		11.4514	33.6172	0.000205819
11.1077	0	1.1872e-05		10.2866	0	10.4366	0		11.4681	14.8301	0
11.1244	3e-06	3.95735e-06		10.3033	0	10.4533	0		11.4848	2.08791	0
11.141	3e-06	2.50632e-05		10.32	1.6e-05	10.47	0		11.5015	7.18507	0
11.1577	7e-06	0		10.3366	0	10.4866	8.44234e-05		11.5181	17.2396	0
11.1744	1.9e-05	0		10.3533	0	10.5033	5.27646e-06		11.5348	28.5844	0
11.1911	0	0		10.37	9e-06	10.52	3.95735e-06		11.5515	19.5418	0.18928
11.2077	0	0		10.3866	0	10.5367	0		11.5681	35.2843	15.1919
11.2244	0	0		10.4033	5.2e-05	10.5533	0		11.5848	36.0281	24.0842
11.2411	0	0		10.42	0	10.57	0		11.6015	1.12388	26.8672
11.2577	0	4.74882e-05		10.4367	0	10.5867	0		11.6182	0	23.854
11.2744	8.4e-05	0		10.4533	0	10.6034	0		11.6348	0	3.27722
11.2911	0.000113	0		10.47	0	10.62	3.03396e-05		11.6515	0	0
11.3078	2.4e-05	6.59558e-06		10.4867	0	10.6367	3.03396e-05		11.6682	0	0
11.3245	2.5e-05	6.59558e-06		10.5033	1.7e-05	10.6534	0		11.6849	0	3.36196
11.3411	0	0		10.52	4.7e-05	10.67	0		11.7015	0	3.44725
11.3578	3.8e-05	1.31912e-05		10.5367	2.8e-05	10.6867	0		11.7182	0	3.05433
11.3745	8e-06	1.71485e-05		10.5534	0	10.7034	0		11.7349	0	11.6141
11.3911	9e-06	1.58294e-05		10.57	0	10.7201	0		11.7515	0	8.69745
11.4078	3e-05	4.08926e-05		10.5867	1.4e-05	10.7367	1.1872e-05		11.7682	0	11.0204
11.4245	3.5e-05	1.45103e-05		10.6034	0	10.7534	1.84676e-05		11.7849	0	25.9409
11.4412	4e-06	0		10.6201	0	10.7701	3.95735e-05		11.8016	0	15.0588
11.4578	1.2e-05	4.82597		10.6367	0	10.7867	0		11.8182	0	6.63382e-05
11.4745	0	4.94826		10.6534	0	10.8034	0		11.8349	0	0
11.4912	0	0		10.6701	0	10.8201	0		11.8516	0	0.000557921
11.5078	0	3.03397e-05		10.6867	0	10.8368	0		11.8682	0	0.000571529
11.5245	3e-05	3.03397e-05		10.7034	0	10.8534	0		11.8849	0	0
11.5412	0	5.01264e-05		10.7201	0	10.8701	0		11.9016	0	0
11.5579	0	0.000178081		10.7368	6.4e-05	10.8868	0		11.9183	0	0
11.5745	0	0		10.7534	0	10.9034	0		11.9349	3.02637	0
11.5912	0	0		10.7701	0	10.9201	4.08926e-05		11.9516	3.10314	12.6733
11.6079	0	0		10.7868	0	10.9368	0.000138507		11.9683	0	16.685
11.6245	9e-06	5.27646e-06		10.8035	0	10.9535	0		11.9849	0	3.78383
11.6412	1.4e-05	5.27646e-06		10.8201	0	10.9701	0		12.0016	0.000114	0
11.6579	5e-06	9.23381e-06		10.8368	0	10.9868	0		12.0183	0.000117	4.79912
11.6746	2e-06	1.1872e-05		10.8535	5.6e-05	11.0035	0		12.035	0	4.92086
11.6912	1e-05	0		10.8702	0	11.0202	0		12.0516	0.32936	5.84078
11.7079	1e-05	6.06793e-05		10.8868	0	11.0368	0		12.0683	0.33771	16.5133
11.7246	0	6.8594e-05		10.9035	0	11.0535	0		12.085	0	10.7913
11.7413	8e-06	0		10.9202	0	11.0702	2.63823e-06		12.1016	0	0
11.7579	1.4e-05	3.95735e-06		10.9368	0	11.0868	0		12.1183	0	0
11.7746	0	5.14455e-05		10.9535	0	11.1035	6.19984e-05		12.135	0	0
11.7913	3e-05	0.000254589		10.9702	0	11.1202	0		12.1517	0	0
11.8079	4.4e-05	0.000261185		10.9869	0	11.1369	0		12.1683	0	0
11.8246	0	0		11.0035	0	11.1535	2.50632e-05		12.185	0	0
11.8413	0	7.65087e-05		11.0202	0	11.1702	2.63823e-05		12.2017	0	0
11.858	0	0		11.0369	0	11.1869	7.91469e-05		12.2184	0	0
11.8746	1.4e-05	2.90205e-05		11.0535	0	11.2035	2.37441e-05		12.235	0	0
11.8913	3.8e-05	0		11.0702	0	11.2202	0		12.2517	0	0
11.908	2e-05	0		11.0869	5e-05	11.2369	0		12.2684	0.01207	0
11.9246	4.8e-05	0		11.1036	3e-05	11.2536	0		12.2851	0.01238	0
11.9413	9e-05	0		11.1202	1.3e-05	11.2702	9.62954e-05		12.3017	0	0
11.958	3.3e-05	0		11.1369	1.9e-05	11.2869	2.11058e-05		12.3184	0	0
11.9747	0	0		11.1536	3.7e-05	11.3036	1.58294e-05		12.3351	0	0
11.9913	0	4.88073e-05		11.1702	3.7e-05	11.3203	0		12.3517	0	0
12.008	0	5.01264e-05		11.1869	0	11.3369	0		12.3684	0	0
12.0247	0	2.63823e-05		11.2036	0	11.3536	5.54028e-05		12.3851	0	0
12.0413	3.7e-05	0		11.2203	0	11.3703	5.67219e-05		12.4018	0	13.8932
12.058	0	0		11.2369	0	11.3869	5.27646e-06		12.4184	0	14.2456
12.0747	0	0		11.2536	0	11.4036	2.11058e-05		12.4351	0	0
12.0914	4e-06	2.37441e-05		11.2703	0	11.4203	0		12.4518	0	0
12.108	0	1.31912e-05		11.2869	0	11.437	0		12.4685	0	7.73657
12.1247	0	5.27646e-06		11.3036	0	11.4536	3.4297e-05		12.4851	0	14.6791
12.1414	0	0		11.3203	0	11.4703	2.50632e-05		12.5018	0	6.91746
12.1581	0	5.27646e-06		11.337	0	11.487	2.63823e-05		12.5185	0	0
12.1747	3.5e-05	0		11.3536	0	11.5037	0		12.5351	0	0
12.1914	3.6e-05	0		11.3703	5.5e-05	11.5203	0		12.5518	0	0
12.2081	4.6e-05	0		11.387	0	11.537	0		12.5685	0	0
12.2248	3.5e-05	2.37441e-05		11.4037	4.4e-05	11.5537	0		12.5852	0	0
12.2414	0	0		11.4203	0	11.5703	0		12.6018	0	0
12.2581	3.8e-05	0		11.437	0	11.587	0		12.6185	0	0
12.2748	6.3e-05	0		11.4537	0	11.6037	8.31042e-05		12.6366	0	0
12.2914	0	0		11.4703	0	11.6204	0		12.6532	0	0
12.3081	4e-06	0		11.487	0	11.637	4.22117e-05		12.6699	0	0
12.3248	0	0		11.5037	1e-05	11.6537	5.93602e-05		12.6866	0	0
12.3415	0	4.88073e-05		11.5204	0	11.6704	0		12.7033	0	0
12.3581	0	5.01264e-05		11.537	0	11.687	4.48499e-05		12.7199	0	0
12.3748	1.3e-05	0		11.5537	0	11.7037	4.6169e-05		12.7366	0	13.3292
12.3915	3e-06	0		11.5704	0	11.7204	1.45103e-05		12.7533	0	13.6673
12.4081	0	0		11.587	0	11.7371	0		12.7699	0	0
12.4248	0	5.01264e-05		11.6037	0	11.7537	0		12.7861	0	0
12.4415	0	0		11.6204	0	11.7704	3.4297e-05		12.8027	0	0
12.4582	1.6e-05	8.57425e-05		11.6371	0	11.7871	6.06793e-05		12.8194	0	0
12.4748	1.7e-05	6.19984e-05		11.6537	0	11.8038	1.31912e-05		12.8361	0.07664	0
12.4915	0	0		11.6704	1.6e-05	11.8204	7.91469e-06		12.8528	0.07859	0
12.5082	0	1.45103e-05		11.6871	0	11.8371	2.2425e-05		12.8694	0	0
12.5249	2.3e-05	0		11.7038	0	11.8538	5.67219e-05		12.8861	0.08294	0
12.5415	8.5e-05	6.59558e-06		11.7204	1e-06	11.8704	8.83807e-05		12.9028	0.12915	0
12.5582	9e-06	0		11.7371	0	11.8871	4.48499e-05		12.9194	0	0
12.5749	3e-06	0		11.7538	0	11.9038	1.58294e-05		12.9361	0	0
12.5915	3e-06	0		11.7705	0.000125	11.9205	2.11058e-05		12.9528	0	0
12.6082	1.7e-05	0		11.7871	0.000126	11.9371	2.77014e-05		12.9695	0	0
12.6249	0	0		11.8038	0	11.9538	4.48499e-05		12.9861	0	0
12.6416	8e-06	0		11.8205	0.48205	11.9705	3.16588e-05		13.0028	0.43671	0
12.6582	1e-05	0		11.8371	0.49428	11.9871	0		13.0195	0.44786	0
12.6749	0	0		11.8538	1.8e-05	12.0038	0		13.0361	7.3e-05	0
12.6916	0	6.06793e-05		11.8705	1.8e-05	12.0205	0.000125316		13.0528	0	0
12.7082	0	0.000183357		11.8872	0	12.0372	3.16588e-05		13.0695	0	0
12.7249	0	0.000116082		11.9038	0	12.0538	0		13.0862	0.168	0
12.7416	0	0		11.9205	0	12.0705	5.01264e-05		13.1028	0.17226	0
12.7583	0	0		11.9372	0	12.0872	0		13.1195	0	0
12.7752	1.6e-05	2.50632e-05		11.9538	0	12.1038	0		13.1362	0	4.23739
12.7919	8.1e-05	0		11.9705	0	12.1205	0		13.1529	0	4.34489
12.8086	8.8e-05	1.31912e-05		11.9872	2e-06	12.1372	0		13.1695	3.48264	0
12.8252	5.4e-05	4.22117e-05		12.0039	2.3e-05	12.1539	0		13.1862	3.57099	0
12.8419	5.2e-05	0.000123997		12.0205	0	12.1705	0		13.2029	0	0
12.8586	4.7e-05	0.000205782		12.0372	0	12.1872	1.31912e-05		13.2195	0	0
12.8753	0.000105	0.000182038		12.0539	0	12.2039	0		13.2362	0	0
12.8919	0.000137	5.6722e-05		12.0706	0	12.2206	0		13.2529	0	0
12.9086	0	0		12.0872	0	12.2372	0		13.2696	0	0
12.9258	0	9.1019e-05		12.1039	0	12.2539	3.29779e-05		13.2862	0	0
12.9425	0.000161	0.000733428		12.1206	0	12.2706	1.97867e-05		13.3029	0	0
12.9592	0.00051	0.000609431		12.1372	0	12.2873	0		13.3187	0	0
12.9758	0.000495	0		12.1539	0	12.3039	3.16588e-05		13.3354	0	0
12.9925	0.000534	0.0002691		12.1706	2.3e-05	12.3206	3.16588e-05		13.3521	0	0
13.0092	0.000733	0.000325822		12.1873	2.4e-05	12.3373	0		13.3688	0.87751	0
13.0259	0.000383	0		12.2039	0	12.3539	0		13.3854	0.89977	0
13.0425	0.000102	0.000587006		12.2206	0	12.3706	7.91469e-06		13.4021	0	0
13.0592	0.00026	0.000577773		12.2373	0	12.3873	7.91469e-06		13.4188	0	0
13.0759	0.000394	0		12.2539	0	12.404	0		13.4354	0	0
13.0925	0.000289	0.000122678		12.2706	0	12.4206	0		13.4521	0	0
13.1092	0.000408	0.000469605		12.2873	0	12.4373	2.63823e-05		13.4688	0	0
13.1259	0.000462	0.000391777		12.304	0	12.454	6.06793e-05		13.4855	0	0
13.1426	0.000498	0.000531604		12.3207	0	12.4706	9.49763e-05		13.5021	0	0
13.1593	0.000957	0.000858744		12.3373	0	12.4873	0.000120039		13.5188	0	0
13.1759	0.00115	0.000783555		12.354	0	12.504	7.38704e-05		13.5355	0	0
13.1926	0.000875	0.000448499		12.3707	0	12.5207	0		13.5521	0	0
13.2093	0.00039	0.000728152		12.3873	1e-05	12.5373	0		13.5688	0	0.62351
13.2259	0.000233	0.000606793		12.404	0	12.554	0		13.5855	0	0.63932
13.2426	0.000354	0.000502583		12.4207	0	12.5707	0		13.6021	0	0
13.2593	0.000483	0.00127		12.4374	4.2e-05	12.5874	0		13.6188	0	0
13.2759	0.00061	0.00135		12.454	0.000114	12.604	0		13.6355	0	0
13.2926	0.000502	0.000625261		12.4707	1.5e-05	12.6207	0		13.6521	0	0
13.3093	7.7e-05	0.000472243		12.4874	2.6e-05	12.6374	0		13.6688	0	0
13.326	0	0.000893041		12.504	0	12.654	4.22117e-05		13.6855	0	0
13.3426	0.000155	0.000712322		12.5207	0	12.6707	0		13.7021	0	0
13.3593	0.000617	0.000313949		12.5374	4.3e-05	12.6874	6.33175e-05		13.7188	0	0
13.376	0.000826	0.000548752		12.5541	4.4e-05	12.7041	7.38704e-05		13.7355	0	0
13.3927	0.000365	0.00175		12.5707	0	12.7207	1.05529e-05		13.7522	0	0
13.4093	0.000392	0.00182		12.5874	0	12.7374	6.59558e-06		13.7688	0	0
13.426	0.000547	0.000613389		12.6041	0.000178	12.7541	0		13.7855	0	0
13.4427	0.000119	0.000883807		12.6207	9.3e-05	12.7707	0		13.8022	0	0

## Sheet: Fig 4I
	UDP-glucose	UDP-galactose	UDP-glcNAC/UDPG-galNAC	UDP-glcA	UDP-xyl	GDP-fuc	GDP-Man	CMP-sialic_acid	TIC
ctrl 1	9746	2746	406137	5911				30076	109784
ctrl 2	9112	2384	361457	6571				28840	97046
ctrl 3	11703	2499	496054	1412				34777	132086
SLC35D3OE 1	8451	1208	220182	434				23952	63579
SLC35D3OE 2	11090	2797	322016	5824				31243	92062
SLC35D3OE 3	8778	1854	268318	5301				24946	73569
	normalization
	UDP-glucose	UDP-galactose	UDP-glcNAC/UDPG-galNAC	UDP-glcA	UDP-xyl	GDP-fuc	GDP-Man	CMP-sialic_acid
ctrl 1	0.981766	1.09548	0.992728	1.22144				0.984951
ctrl 2	1.03838	1.0759	0.999484	1.53605				1.06844
ctrl 3	0.979853	0.828616	1.00779	0.24251				0.946606
SLC35D3OE 1	1.46999	0.832141	0.929319	0.154856				1.35445
SLC35D3OE 2	1.33221	1.33063	0.938629	1.43513				1.22013
SLC35D3OE 3	1.31954	1.10372	0.978705	1.63461				1.2191
