# Supplementary material for: Localization, proteomics, and metabolite profiling reveal a putative vesicular transporter for UDP-glucose
Source: eLife. 2021 Jul 16;10:e65417. doi: 10.7554/eLife.65417 (PMC8373376; doi:10.7554/eLife.65417)
Supplement: Figure 5—source data 1. [file elife-65417-fig5-data1.xlsx]

## Sheet: Fig 5B
	normalized UDP-glc transport					normalized UDP-gal transport					normalized UDP-glcNAc transport
	ctrl	mSLC35D3OE	hSLC35D3OE	SLC35A2OE		ctrl	mSLC35D3OE	hSLC35D3OE	SLC35A2OE		ctrl	mSLC35D3OE	hSLC35D3OE	SLC35A2OE
sample1	1.08351	1.89614	1.95094	1.59396	--	1.25773	1.31959	1.18557	5.26366	--	0.99043	1.07081	1.30909	0.96983
sample2	0.91754	1.92589	1.84916	1.66659	--	0.87629	0.8866	1.29897	5.20441	--	0.99904	1.04211	1.26603	1.09855
sample3	0.99896	1.92432	2.01983	1.64822	--	0.86598	0.87629	1.34021	5.24827	--	1.01053	0.89569	1.1512	1.1424

## Sheet: Fig 5C
	normalized competition
	Mock	UDP-glc	GDP-Man	UDP-glcA	UDP-gal	UDP-xyl	GDP-fuc	UDP-glcNAc	CMP-SA	PAPS	UDP-galNAc
sample1	0.84073	0.08468	0.12737	0.25474	0.22379	0.68835	0.73713	0.7379	0.7832	0.96206	1.39113
sample2	1.23387	-0.00605	-0.03794	0.2439	0.36593	0.7561	0.82656	0.92843	1.00542	1.04878	1.10383
sample3	0.9254	0.03024	0.04607	0.38482	0.51411	0.71003	0.63686	0.62298	0.74526	1.11653	1.19456

## Sheet: Fig 5D
Time (min)	radioactive signal (c.p.m.)	SE
0	18	6.12826
0.5	91.3333	51.9194
1.5	299	17.5773
2.5	448.333	24.596
3.5	506.667	17.9959

## Sheet: Fig 5E
Concentration (uM)	Radioactive signal (c.p.m.)	SE
0	0
0.125	435.333	22.9056
0.25	582.333	59.778
0.5	1120.67	43.5388
1	1533	49.4286
2	2037	15.3285
4	2859	397.5

## Sheet: Fig 5G
	normalized phamacology treatment
	Mock	NEM	FCCP	Nig	Baf A1	Val
sample1	1.02879	-0.00762	0.4674	0.53091	0.92972	0.90178
sample2	0.96782	-0.01524	0.47756	0.64776	1.10754	1.28789
sample3	1.00339	0.00254	0.2591	0.75953	0.97798	0.91956
