# Supplementary figures and images for: Localization, proteomics, and metabolite profiling reveal a putative vesicular transporter for UDP-glucose
Source: eLife journal article supplement (doi:10.7554/elife.65417), 2021-07-16

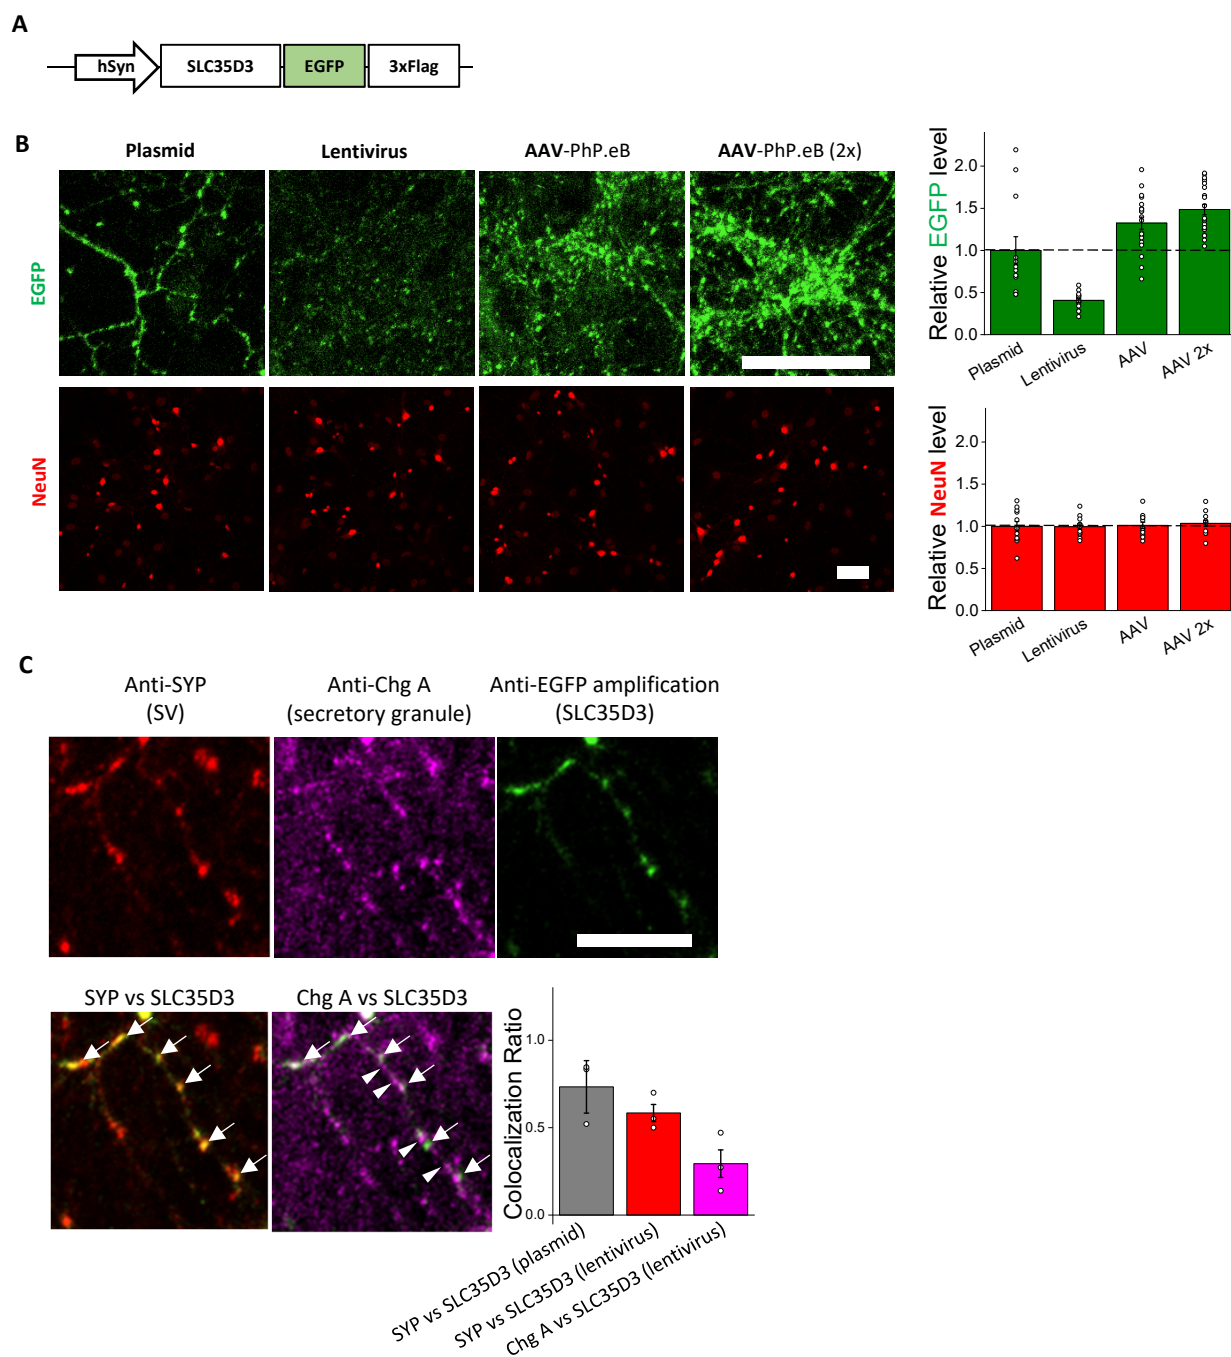

**Figure 1-figure supplement 1. Subcellular localization of SLC35D3 at a reduced expression level**

Supplement: supp [file elife_poa_e65417_Figure_1_figure_supplement_1.pdf › elife_poa_e65417_Figure_1_figure_supplement_1.pdf]

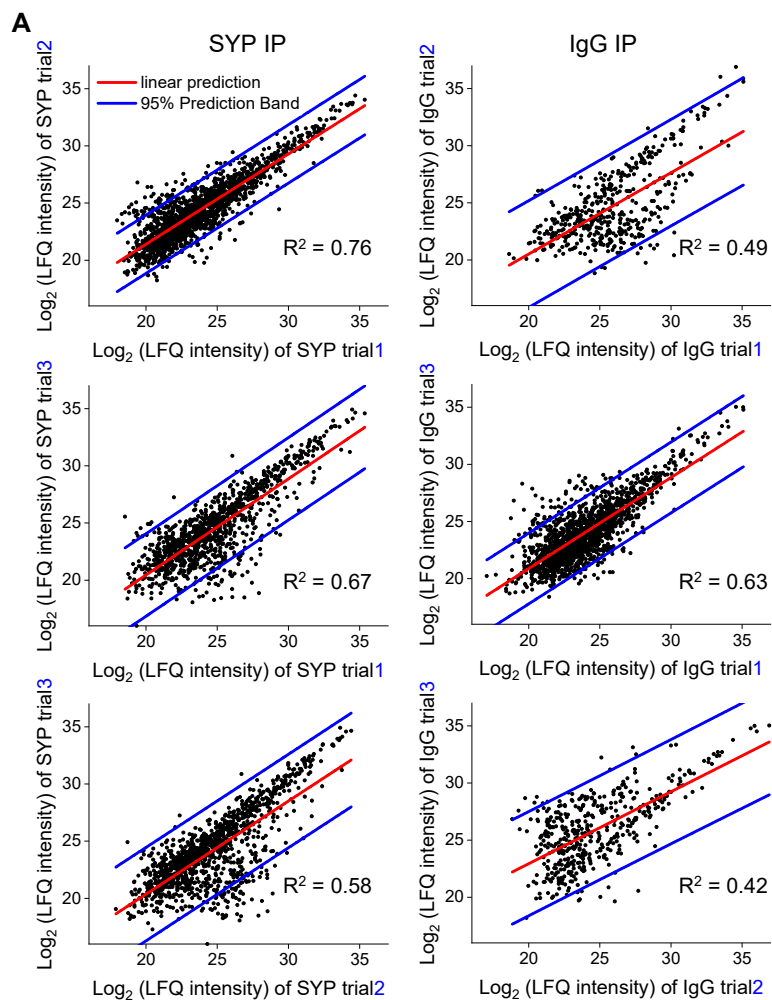

**Figure 2-figure supplement 1. Repeatability of the proteomic data**

Supplement: supp [file elife_poa_e65417_Figure_2_figure_supplement_1.pdf › elife_poa_e65417_Figure_2_figure_supplement_1.pdf]

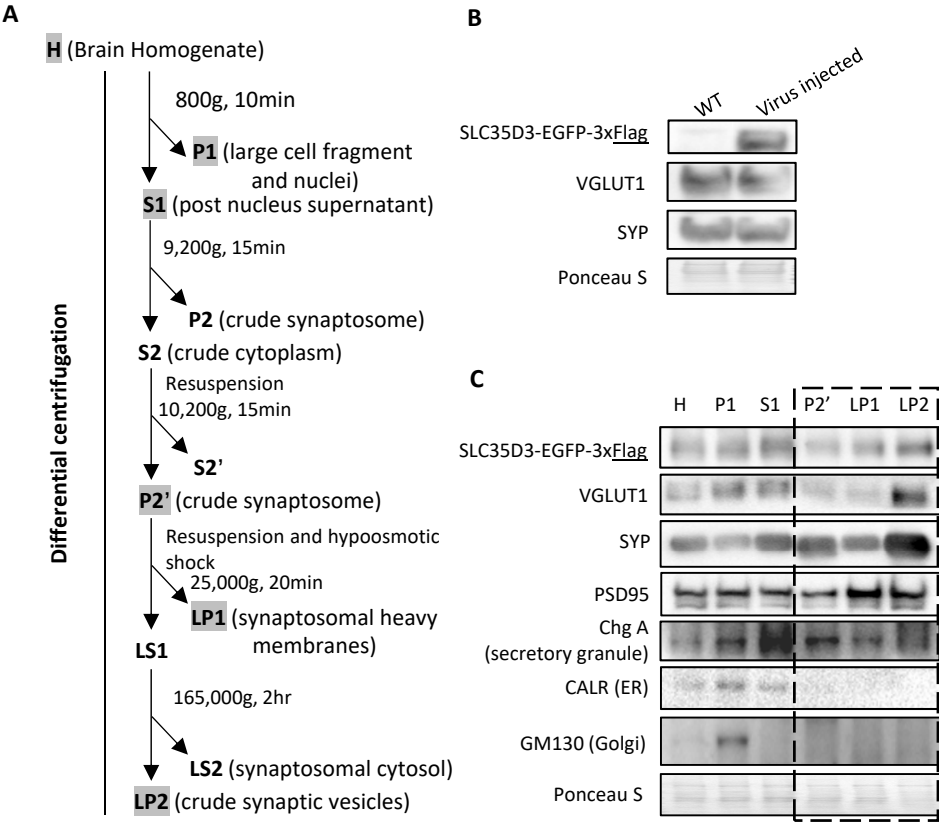

Figure 2-figure supplement 2. SLC35D3 in subcellular fractionation of SVs

Supplement: supp [file elife_poa_e65417_Figure_2_figure_supplement_2.pdf › elife_poa_e65417_Figure_2_figure_supplement_2.pdf]

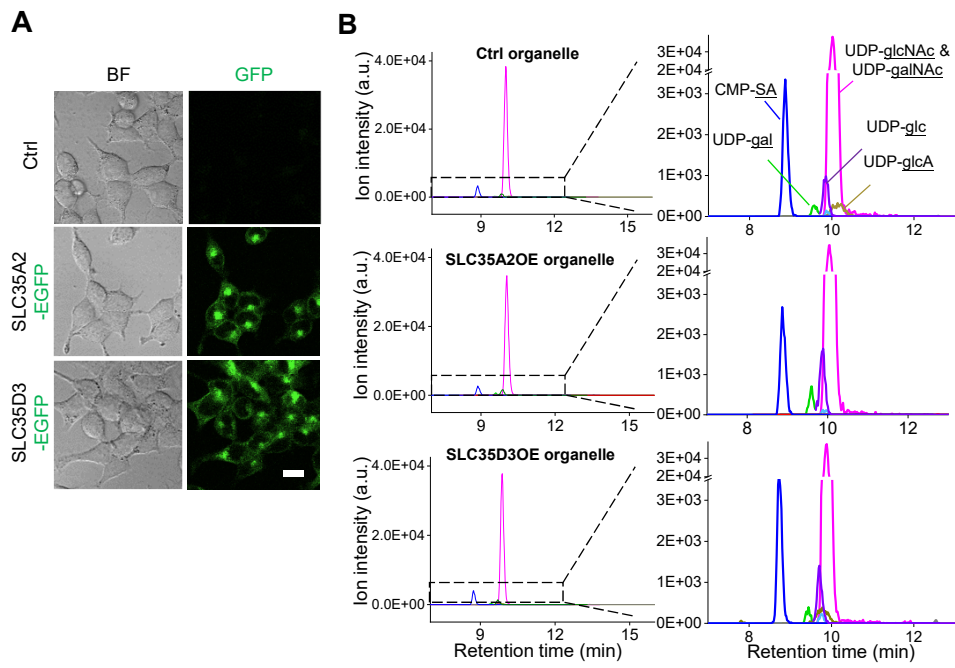

**Figure 4-figure supplement 1. Additional analysis of metabolite profiling**

Supplement: supp [file elife_poa_e65417_Figure_4_figure_supplement_1.pdf › elife_poa_e65417_Figure_4_figure_supplement_1.pdf]

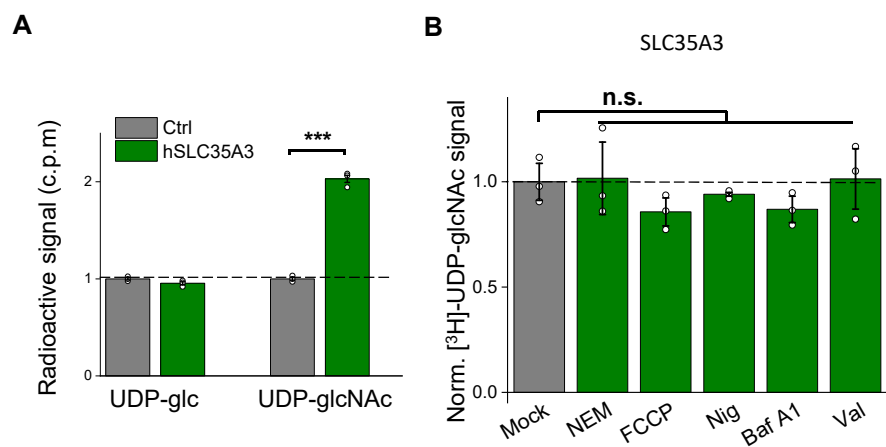

Figure 5-figure supplement 1. Pharmacology insensitive transport activity by SLC35A3

Supplement: supp [file elife_poa_e65417_Figure_5_figure_supplement_1.pdf › elife_poa_e65417_Figure_5_figure_supplement_1.pdf]
